# Supplementary material for: Differential effects of cisplatin on cybrid cells with varying mitochondrial DNA haplogroups
Source: PubMed Central journal article supplement (PMC7533064; doi:10.7717/peerj.9908), 2020-10-01
Supplement: peerj-08-9908-s001.pdf [file peerj-08-9908-s001.pdf]

# Human mtDNA Migrations

From <http://www.mitomap.org>

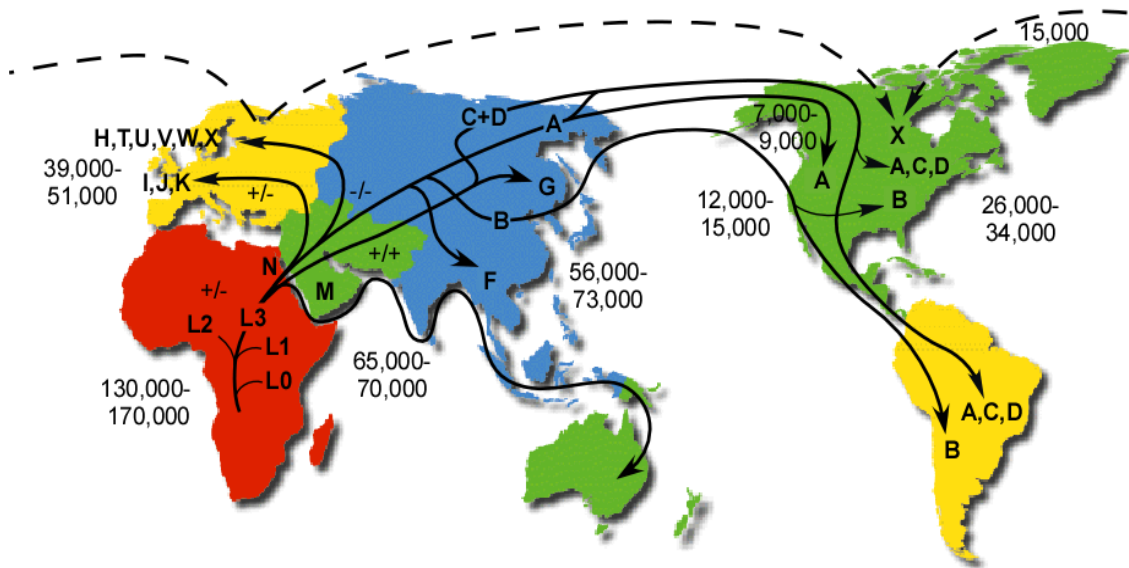

Symbols +/-, +/+, and -/- represent RFLP status for Dde I 10394 / Alu I 10397

Mutation rate = 2.2 - 2.9 % / MYR  
Time estimates are YBP

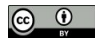

This is licensed by a Creative Commons Attribution 3.0 license.
