# Supplementary material for: Differential effects of cisplatin on cybrid cells with varying mitochondrial DNA haplogroups
Source: PeerJ. 2020 Oct 1;8:e9908. doi: 10.7717/peerj.9908 (PMC7533064; doi:10.7717/peerj.9908)
Supplement: Supplemental Information 3 — Raw and normalized data for the L, A, B, and D haplogroups. Values were normalized to the L untreated average. These values were used to evaluate cell viability as well as growth rate. [file peerj-08-9908-s003.xlsx]

## Sheet: MTT
Normalized	11.30 U	11.30 T	13.124 U	13.124 T	11.17 U	11.17 T	11.31 U	11.31 T	11.38 U	11.38 T	13.125 U	13.125 T	13.126 U	13.126 T		11.14 U	11.14 T	11.16 U	11.16 T
L Haplogroup	1.12526	0.57892	0.932288	0.59897	0.694203	0.90472	0.862115	0.927275	1.40344	0.917251	0.779412	0.779412	1.48615	0.689191		1.22049	0.90472	0.962361	0.74182
	0.614007	0.711746	0.706734	0.478675	1.50369	0.280689	1.06762	0.909732	1.24556	0.959855	0.819511	0.862115	1.7518	0.827029		1.11022	0.887177	1.02502	0.882165
	1.19543	0.649093	0.897201	0.586439	1.32826	0.243096	1.24305	0.947324	1.24305	1.17288	0.829535	0.822017	1.74929	0.829535		1.1403	0.917251	1.14782	0.448601
	0.694203	0.546341	0.731796	0.451107	1.25809	0.779412	1.08266	0.967374	0.661623	1.13779	0.824523	0.686685	1.08767	0.619019		1.11774	0.932288	0.7744	0.358379
	1.03003	0.608994	0.679166	0.714253	1.30821	0.64408	0.999954	1.10521	0.754351	1.00747	0.884671	0.771894	1.43853	0.280689		1.1403	0.944818	0.691697	0.862115
	0.947324	0.779412	0.764376	0.518773	0.411008	0.37091	0.984917	1.15784	0.794449	1.13278	0.689191	0.528798	1.28816	0.776906		1.23303	1.06511	0.458625	0.421033
			0.884671	0.443588	0.278183	0.250615	1.23553	0.987423	0.897201	0.83956	0.731796	0.974892	1.32826	0.827029		1.24806	0.887177	0.724277	0.847078
			0.859609	0.646587	0.6115	0.483687	1.28315	0.992435	0.724277	1.15784	0.756857	0.899708	1.61647	0.293219		1.19293	0.867128	0.671648	0.721771
	0.934376	0.645751	0.80698	0.554799	0.924143	0.494651	1.09487	0.999327	0.965494	1.04068	0.789437	0.79069	1.46829	0.642827		1.23052	0.90472
																1.16536	0.899708
Normalized	12.40 U	12.40 T	13.68 U	13.68 T	B Haplo	12.40 U	12.40 T	13.68 U	13.68 T	A Haplo	11.14 U	11.14 T	11.16 U	11.16 T		1.13027	0.994941
B Haplogroup	0.769388	0.588945	1.08767	0.438576		1.02735	0.858225	1.11064	0.689104		0.994531	0.646193	1.12831	0.979386		1.23804	0.982411
	0.473662	0.829535	0.556365	0.456119		1.76441	0.845604	1.2419	0.646193		0.820362	0.696676	0.944047	0.785023		1.18061	0.932288	1.05645	0.66037
	0.556365	0.463638	0.556365	0.451107		1.67354	0.782499	1.12326	0.752209		0.941523	0.484645	0.865797	0.777451
	1.15533	1.25809	0.862115	0.7744		1.55743	0.817838	1.01472	0.663862		0.938999	0.509886	1.0021	0.832983
	1.12526	0.857103	0.571402	0.43607		1.65082	0.802692	0.625999	0.739588		0.838031	0.636096	0.964241	0.777451
	0.789437	0.543834	0.811992	0.593957		1.59276	0.911233	0.782499	0.832983		0.87337	0.790072	0.964241	0.800168
	1.02251	0.877152	0.365898	0.461131		0.959192	0.598233	1.22928	0.699201		0.901136	0.627261	0.978124	0.82541
	0.641574	0.974892	0.433564	0.639068		0.926378	0.691628	1.11317	0.646193
	0.816691	0.799148	0.655671	0.531304		0.994531	0.613378	1.16113	0.623475
						0.8557	0.585612	1.10307	0.676483
						0.946571	0.633572	1.252	0.628523
						1.12579	0.585612	1.24443	0.759781
						1.25621	0.727177	1.08351	0.696466
Normalized	13.55 U	13.55 T	12.41 U	12.41 T	11.18 U	11.18 T	11.29 U	11.29 T	D Haplo	13.55 U	13.55 T	12.41 U	12.41 T	11.29 U	11.29 T
D Haplogroup	1.28565	1.0576	1.16035	1.06511	1.37337	1.11022	1.15032	0.922263		1.34792	0.830459	1.1788	0.926378	1.34539	0.888515
	1.14782	0.992435	0.947324	0.934794	1.09769	1.1428	1.1829	0.834548		1.32268	0.8557	0.901136	0.792596	1.07278	0.800168
	1.10772	0.979904	0.66413	0.764376	1.10521	1.01499	1.15784	0.894695		1.26967	0.774926	0.782499	0.832983	1.19899	0.777451
	1.04506	0.924769	1.01499	0.884671	1.13779	0.947324	1.10521	0.842066		1.252	0.888515	0.931426	0.858225	1.13084	0.774926
	1.04005	0.914745	0.847078	0.907226	1.24054	0.817005	1.13278	0.874646		1.20404	0.835507	1.04501	0.923854	1.12326	0.76483
	0.977398	0.822017	1.15032	1.04005	1.0175	0.869634	1.13027	0.922263		1.18637	0.785023	1.15608	0.956668	1.28481	0.84308
	0.972386	0.814499			1.12526	1.11273	0.979904	0.842066		1.26378	0.828355	0.999159	0.881784	1.19268	0.808162
	0.862115	0.781919			1.17538	0.63155	1.23804	0.857103
		0.769388			1.15533	0.498724	1.20045	0.739314
		0.751845			1.20295	1.11774	1.24054	0.967374
		0.724277			1.33578	1.05008	1.21548	0.844572
		0.666636			1.26561	0.666636	1.33578	0.932288
	1.05478	0.850002	0.964032	0.932705	1.18604	0.914953	1.17246	0.872767
	L-Unt	L-treated	A+B-Unt	A+B-T	D-Unt	D-treated
	93	65	82	80	105	85
	81	55	66	53	96	93
	92	49	126	73	119	91
	109	100	108	70	117	87
	97	104	90	63	126	83
	79	79	98	83	100	88
	147	64	95	70.3333	119	81
	118	93			111.714	86.8571
	106	66
	102.444	75
