# Supplementary material for: Differential effects of cisplatin on cybrid cells with varying mitochondrial DNA haplogroups
Source: PeerJ. 2020 Oct 1;8:e9908. doi: 10.7717/peerj.9908 (PMC7533064; doi:10.7717/peerj.9908)
Supplement: Supplemental Information 11 — Data for the grouped gene expression fold values of the BRCA, ALK, EGFR, and ERB2 genes. [file peerj-08-9908-s011.xlsx]

## Sheet: Sheet1
BALD Experiment Fold Gene Expression Values
BRCA
	CY L 13-126 U	CY L 13-126 Cis	CY L 13-125 U	CY L 13-125 Cis	CY L 13-124 U	CY L 13-124 Cis	CY L 11-38 U	CY L 11-38 Cis	CY L 11-30 U	CY L 11-30 Cis	CY D 13-55 U	CY D 13-55 Cis	CY D 11-29 U	CY D 11-29 Cis	CY D 11-18 U	CY D 11-18 Cis	CY B 13-68 U	CY B 13-68 Cis	CY B 12-40 U	CY B 12-40 Cis	CY A 11-16 U	CY A 11-16 Cis	CY A 11-14 U	CY A 11-14 Cis
	1	1.37	0.921	2.23	0.912	0.55	0.806	0.4	1.222	2.36	0.968	3.1	1.916	2.14	0.683	4.05	0.56	0.81	3.3	2.12	0.738	0.9	0.839	2.42
	L Haplgroup										D Haplgroup						B Haplogroup				A Haplogroup
	1		2		3		4		5		1		2		3		1		2		1		2
	1.37		2.42128		0.60307		0.496278		1.93126		3.20248		1.11691		5.92972		1.44643		0.642424		1.21951		2.88439
	Average L Fold Treated/ Untreated										Average D Fold Treated/ Untreated						Average B and A Fold Treated/ Untreated
average	1.36438									average	3.41637					average	1.54819
std dev.	0.832409									std dev.	2.41352					std dev.	0.952928
ALK
	CY L 13-126 U	CY L 13-126 Cis	CY L 13-125 U	CY L 13-125 Cis	CY L 13-124 U	CY L 13-124 Cis	CY L 11-38 U	CY L 11-38 Cis	CY L 11-30 U	CY L 11-30 Cis	CY D 13-55 U	CY D 13-55 Cis	CY D 11-29 U	CY D 11-29 Cis	CY D 11-18 U	CY D 11-18 Cis	CY B 13-68 U	CY B 13-68 Cis	CY B 12-40 U	CY B 12-40 Cis	CY A 11-16 U	CY A 11-16 Cis	CY A 11-14 U	CY A 11-14 Cis
	1	0.54	0.969	0.17	0.581	0.12	7.027	0.07	8.085	0.05	4.635	13.09	5.705	1.49	2.253	12.1	30.852	0.38	35.208	15.71	0.577	0.09	2.768	0.24
	L Haplgroup										D Haplgroup						B Haplogroup				A Haplogroup
	1		2		3		4		5		1		2		3		1		2		1		2
	0.54		0.175439		0.20654		0.00996158		0.00618429		2.82416		0.261174		5.37062		0.0123169		0.446205		0.155979		0.0867052
	Average L Fold Treated/ Untreated										Average D Fold Treated/ Untreated						Average B and A Fold Treated/ Untreated
average	0.187625										2.81865					average	0.175302
std dev.	0.217462										2.55473					std dev.	0.189891
EGFR
	CY L 13-126 U	CY L 13-126 Cis	CY L 13-125 U	CY L 13-125 Cis	CY L 13-124 U	CY L 13-124 Cis	CY L 11-38 U	CY L 11-38 Cis	CY L 11-30 U	CY L 11-30 Cis	CY D 13-55 U	CY D 13-55 Cis	CY D 11-29 U	CY D 11-29 Cis	CY D 11-18 U	CY D 11-18 Cis	CY B 13-68 U	CY B 13-68 Cis	CY B 12-40 U	CY B 12-40 Cis	CY A 11-16 U	CY A 11-16 Cis	CY A 11-14 U	CY A 11-14 Cis
	1	0.54	0.6	0.43	0.36	0.56	1.7	1.25	1.35	0.34	0.48	0.28	1.3	0.18	0.36	0.39	3.14	1.35	2.83	0.47	0.71	0.69	0.7	0.28
	L Haplgroup										D Haplgroup						B Haplogroup				A Haplogroup
	1		2		3		4		5		1		2		3		1		2		1		2
	0.54		0.716667		1.55556		0.735294		0.251852		0.583333		0.138462		1.08333		0.429936		0.166078		0.971831		0.4
	Average L Fold Treated/ Untreated										Average D Fold Treated/ Untreated						Average B and A Fold Treated/ Untreated
average	0.759874									average	0.601709					average	0.491961
std dev.	0.485286									std dev.	0.472704					std dev.	0.340969
ERB2
	CY L 13-126 U	CY L 13-126 Cis	CY L 13-125 U	CY L 13-125 Cis	CY L 13-124 U	CY L 13-124 Cis	CY L 11-38 U	CY L 11-38 Cis	CY L 11-30 U	CY L 11-30 Cis	CY D 13-55 U	CY D 13-55 Cis	CY D 11-29 U	CY D 11-29 Cis	CY D 11-18 U	CY D 11-18 Cis	CY B 13-68 U	CY B 13-68 Cis	CY B 12-40 U	CY B 12-40 Cis	CY A 11-16 U	CY A 11-16 Cis	CY A 11-14 U	CY A 11-14 Cis
	1	0.68	0.67	0.73	0.42	0.92	1.36	1.16	1	0.5	0.36	0.4	0.84	5.42	0.38	0.5	1.05	0.98	1.11	0.3	0.72	0.68	0.45	0.51
	L Haplgroup										D Haplgroup						B Haplogroup				A Haplogroup
	1		2		3		4		5		1		2		3		1		2		1		2
	0.68		1.08955		2.19048		0.852941		0.5		1.11111		6.45238		1.31579		0.933333		0.27027		0.944444		1.13333
	Average L Fold Treated/ Untreated										Average D Fold Treated/ Untreated						Average B and A Fold Treated/ Untreated
average	1.06259									average	2.95976					average	0.820345
std dev.	0.667025									std dev.	3.02643					std dev.	0.378026
