# Supplementary material for: Differential effects of cisplatin on cybrid cells with varying mitochondrial DNA haplogroups
Source: PeerJ. 2020 Oct 1;8:e9908. doi: 10.7717/peerj.9908 (PMC7533064; doi:10.7717/peerj.9908)
Supplement: Supplemental Information 14 — The raw and normalized data for the ALK, BRCA1, and housekeeper genes. Normalized data was input into GraphPad Prism for analysis afterward. [file peerj-08-9908-s014.xls]

## Sheet: Sample Setup
Block Type	384-Well Block
Calibration Background is expired	Yes
Calibration Background performed on	2016-02-12 13:07:10 PM PST
Calibration FAM is expired	Yes
Calibration FAM performed on	2016-02-12 14:10:50 PM PST
Calibration NED is expired	Yes
Calibration NED performed on	2014-11-24 13:16:28 PM PST
Calibration ROI is expired	Yes
Calibration ROI performed on	2016-02-12 12:57:08 PM PST
Calibration ROX is expired	Yes
Calibration ROX performed on	2016-02-12 14:26:17 PM PST
Calibration SYBR is expired	Yes
Calibration SYBR performed on	2016-02-12 14:49:42 PM PST
Calibration TAMRA is expired	Yes
Calibration TAMRA performed on	2016-02-12 14:38:45 PM PST
Calibration Uniformity is expired	Yes
Calibration Uniformity performed on	2016-02-12 13:16:49 PM PST
Calibration VIC is expired	Yes
Calibration VIC performed on	2016-02-12 14:01:38 PM PST
Chemistry	SYBR_GREEN
Experiment Barcode
Experiment Comments
Experiment File Name	D:\Documents and Settings\INSTR-USER\Viia7 Experiments\Kenney Lab\2016-11-21 101524 BALD ALK BRCA1 PDCD1 HMBS.eds
Experiment Name	2016-11-21 101524 BALD ALK BRCA1 PDCD1 HMBS
Experiment Run Start Time	2016-11-21 11:10:35 AM PST
Experiment Run Stop Time	2016-11-21 12:57:52 PM PST
Experiment Type	Comparative Cт (ΔΔCт)
Experiment User Name	SHARI
Instrument Name	278880281
Instrument Serial Number	278880281
Instrument Type	ViiA(TM) 7 System
Passive Reference	ROX
Quantification Cycle Method	Ct
Signal Smoothing On	true
Stage/ Cycle where Analysis is performed	Stage 2, Step 2
Well	Well Position	Sample Name	Sample Color	Biogroup Name	Biogroup Color	Target Name	Target Color	Task	Reporter	Quencher	Quantity	Comments
1	A1	CY L 13-126 U	RGB(176,23,31)			HMBS	RGB(176,23,31)	UNKNOWN	SYBR	None
2	A2	CY L 11-30 U	RGB(0,245,255)			HMBS	RGB(176,23,31)	UNKNOWN	SYBR	None
3	A3	CY L 13-126 T	RGB(0,0,255)			HMBS	RGB(176,23,31)	UNKNOWN	SYBR	None
4	A4	CY L 11-30 T	RGB(238,220,130)			HMBS	RGB(176,23,31)	UNKNOWN	SYBR	None
5	A5	CY L 13-125 U	RGB(0,139,69)			HMBS	RGB(176,23,31)	UNKNOWN	SYBR	None
6	A6	CY D 13-55 U	RGB(238,238,0)			HMBS	RGB(176,23,31)	UNKNOWN	SYBR	None
7	A7	CY L 13-125 T	RGB(255,127,0)			HMBS	RGB(176,23,31)	UNKNOWN	SYBR	None
8	A8	CY D 13-55 T	RGB(142,142,56)			HMBS	RGB(176,23,31)	UNKNOWN	SYBR	None
9	A9	CY L 13-124 U	RGB(139,137,112)			HMBS	RGB(176,23,31)	UNKNOWN	SYBR	None
10	A10	CY D 11-29 U	RGB(238,44,44)			HMBS	RGB(176,23,31)	UNKNOWN	SYBR	None
11	A11	CY L 13-124 T	RGB(238,121,66)			HMBS	RGB(176,23,31)	UNKNOWN	SYBR	None
12	A12	CY D 11-29 T	RGB(51,161,201)			HMBS	RGB(176,23,31)	UNKNOWN	SYBR	None
13	A13	CY L 11-38 U	RGB(142,56,142)			HMBS	RGB(176,23,31)	UNKNOWN	SYBR	None
14	A14	CY D 11-18 U	RGB(238,18,137)			HMBS	RGB(176,23,31)	UNKNOWN	SYBR	None
15	A15	CY L 11-38 T	RGB(198,113,113)			HMBS	RGB(176,23,31)	UNKNOWN	SYBR	None
16	A16	CY D 11-18 T	RGB(176,23,31)			HMBS	RGB(176,23,31)	UNKNOWN	SYBR	None
17	A17	CY B 13-68 U	RGB(0,0,255)			HMBS	RGB(176,23,31)	UNKNOWN	SYBR	None
18	A18	CY A 11-16 U	RGB(238,121,66)			HMBS	RGB(176,23,31)	UNKNOWN	SYBR	None
19	A19	CY B 13-68 T	RGB(0,139,69)			HMBS	RGB(176,23,31)	UNKNOWN	SYBR	None
20	A20	CY A 11-16 T	RGB(142,56,142)			HMBS	RGB(176,23,31)	UNKNOWN	SYBR	None
21	A21	CY B 12-40 U	RGB(255,127,0)			HMBS	RGB(176,23,31)	UNKNOWN	SYBR	None
22	A22	CY A 11-14 U	RGB(198,113,113)			HMBS	RGB(176,23,31)	UNKNOWN	SYBR	None
23	A23	CY B 12-40 T	RGB(139,137,112)			HMBS	RGB(176,23,31)	UNKNOWN	SYBR	None
24	A24	CY A 11-14 T	RGB(0,245,255)			HMBS	RGB(176,23,31)	UNKNOWN	SYBR	None
25	B1	CY L 13-126 U	RGB(176,23,31)			HMBS	RGB(176,23,31)	UNKNOWN	SYBR	None
26	B2	CY L 11-30 U	RGB(0,245,255)			HMBS	RGB(176,23,31)	UNKNOWN	SYBR	None
27	B3	CY L 13-126 T	RGB(0,0,255)			HMBS	RGB(176,23,31)	UNKNOWN	SYBR	None
28	B4	CY L 11-30 T	RGB(238,220,130)			HMBS	RGB(176,23,31)	UNKNOWN	SYBR	None
29	B5	CY L 13-125 U	RGB(0,139,69)			HMBS	RGB(176,23,31)	UNKNOWN	SYBR	None
30	B6	CY D 13-55 U	RGB(238,238,0)			HMBS	RGB(176,23,31)	UNKNOWN	SYBR	None
31	B7	CY L 13-125 T	RGB(255,127,0)			HMBS	RGB(176,23,31)	UNKNOWN	SYBR	None
32	B8	CY D 13-55 T	RGB(142,142,56)			HMBS	RGB(176,23,31)	UNKNOWN	SYBR	None
33	B9	CY L 13-124 U	RGB(139,137,112)			HMBS	RGB(176,23,31)	UNKNOWN	SYBR	None
34	B10	CY D 11-29 U	RGB(238,44,44)			HMBS	RGB(176,23,31)	UNKNOWN	SYBR	None
35	B11	CY L 13-124 T	RGB(238,121,66)			HMBS	RGB(176,23,31)	UNKNOWN	SYBR	None
36	B12	CY D 11-29 T	RGB(51,161,201)			HMBS	RGB(176,23,31)	UNKNOWN	SYBR	None
37	B13	CY L 11-38 U	RGB(142,56,142)			HMBS	RGB(176,23,31)	UNKNOWN	SYBR	None
38	B14	CY D 11-18 U	RGB(238,18,137)			HMBS	RGB(176,23,31)	UNKNOWN	SYBR	None
39	B15	CY L 11-38 T	RGB(198,113,113)			HMBS	RGB(176,23,31)	UNKNOWN	SYBR	None
40	B16	CY D 11-18 T	RGB(176,23,31)			HMBS	RGB(176,23,31)	UNKNOWN	SYBR	None
41	B17	CY B 13-68 U	RGB(0,0,255)			HMBS	RGB(176,23,31)	UNKNOWN	SYBR	None
42	B18	CY A 11-16 U	RGB(238,121,66)			HMBS	RGB(176,23,31)	UNKNOWN	SYBR	None
43	B19	CY B 13-68 T	RGB(0,139,69)			HMBS	RGB(176,23,31)	UNKNOWN	SYBR	None
44	B20	CY A 11-16 T	RGB(142,56,142)			HMBS	RGB(176,23,31)	UNKNOWN	SYBR	None
45	B21	CY B 12-40 U	RGB(255,127,0)			HMBS	RGB(176,23,31)	UNKNOWN	SYBR	None
46	B22	CY A 11-14 U	RGB(198,113,113)			HMBS	RGB(176,23,31)	UNKNOWN	SYBR	None
47	B23	CY B 12-40 T	RGB(139,137,112)			HMBS	RGB(176,23,31)	UNKNOWN	SYBR	None
48	B24	CY A 11-14 T	RGB(0,245,255)			HMBS	RGB(176,23,31)	UNKNOWN	SYBR	None
49	C1	CY L 13-126 U	RGB(176,23,31)			HMBS	RGB(176,23,31)	UNKNOWN	SYBR	None
50	C2	CY L 11-30 U	RGB(0,245,255)			HMBS	RGB(176,23,31)	UNKNOWN	SYBR	None
51	C3	CY L 13-126 T	RGB(0,0,255)			HMBS	RGB(176,23,31)	UNKNOWN	SYBR	None
52	C4	CY L 11-30 T	RGB(238,220,130)			HMBS	RGB(176,23,31)	UNKNOWN	SYBR	None
53	C5	CY L 13-125 U	RGB(0,139,69)			HMBS	RGB(176,23,31)	UNKNOWN	SYBR	None
54	C6	CY D 13-55 U	RGB(238,238,0)			HMBS	RGB(176,23,31)	UNKNOWN	SYBR	None
55	C7	CY L 13-125 T	RGB(255,127,0)			HMBS	RGB(176,23,31)	UNKNOWN	SYBR	None
56	C8	CY D 13-55 T	RGB(142,142,56)			HMBS	RGB(176,23,31)	UNKNOWN	SYBR	None
57	C9	CY L 13-124 U	RGB(139,137,112)			HMBS	RGB(176,23,31)	UNKNOWN	SYBR	None
58	C10	CY D 11-29 U	RGB(238,44,44)			HMBS	RGB(176,23,31)	UNKNOWN	SYBR	None
59	C11	CY L 13-124 T	RGB(238,121,66)			HMBS	RGB(176,23,31)	UNKNOWN	SYBR	None
60	C12	CY D 11-29 T	RGB(51,161,201)			HMBS	RGB(176,23,31)	UNKNOWN	SYBR	None
61	C13	CY L 11-38 U	RGB(142,56,142)			HMBS	RGB(176,23,31)	UNKNOWN	SYBR	None
62	C14	CY D 11-18 U	RGB(238,18,137)			HMBS	RGB(176,23,31)	UNKNOWN	SYBR	None
63	C15	CY L 11-38 T	RGB(198,113,113)			HMBS	RGB(176,23,31)	UNKNOWN	SYBR	None
64	C16	CY D 11-18 T	RGB(176,23,31)			HMBS	RGB(176,23,31)	UNKNOWN	SYBR	None
65	C17	CY B 13-68 U	RGB(0,0,255)			HMBS	RGB(176,23,31)	UNKNOWN	SYBR	None
66	C18	CY A 11-16 U	RGB(238,121,66)			HMBS	RGB(176,23,31)	UNKNOWN	SYBR	None
67	C19	CY B 13-68 T	RGB(0,139,69)			HMBS	RGB(176,23,31)	UNKNOWN	SYBR	None
68	C20	CY A 11-16 T	RGB(142,56,142)			HMBS	RGB(176,23,31)	UNKNOWN	SYBR	None
69	C21	CY B 12-40 U	RGB(255,127,0)			HMBS	RGB(176,23,31)	UNKNOWN	SYBR	None
70	C22	CY A 11-14 U	RGB(198,113,113)			HMBS	RGB(176,23,31)	UNKNOWN	SYBR	None
71	C23	CY B 12-40 T	RGB(139,137,112)			HMBS	RGB(176,23,31)	UNKNOWN	SYBR	None
72	C24	CY A 11-14 T	RGB(0,245,255)			HMBS	RGB(176,23,31)	UNKNOWN	SYBR	None
73	D1	CY L 13-126 U	RGB(176,23,31)			ALK	RGB(0,0,255)	UNKNOWN	SYBR	None
74	D2	CY L 11-30 U	RGB(0,245,255)			ALK	RGB(0,0,255)	UNKNOWN	SYBR	None
75	D3	CY L 13-126 T	RGB(0,0,255)			ALK	RGB(0,0,255)	UNKNOWN	SYBR	None
76	D4	CY L 11-30 T	RGB(238,220,130)			ALK	RGB(0,0,255)	UNKNOWN	SYBR	None
77	D5	CY L 13-125 U	RGB(0,139,69)			ALK	RGB(0,0,255)	UNKNOWN	SYBR	None
78	D6	CY D 13-55 U	RGB(238,238,0)			ALK	RGB(0,0,255)	UNKNOWN	SYBR	None
79	D7	CY L 13-125 T	RGB(255,127,0)			ALK	RGB(0,0,255)	UNKNOWN	SYBR	None
80	D8	CY D 13-55 T	RGB(142,142,56)			ALK	RGB(0,0,255)	UNKNOWN	SYBR	None
81	D9	CY L 13-124 U	RGB(139,137,112)			ALK	RGB(0,0,255)	UNKNOWN	SYBR	None
82	D10	CY D 11-29 U	RGB(238,44,44)			ALK	RGB(0,0,255)	UNKNOWN	SYBR	None
83	D11	CY L 13-124 T	RGB(238,121,66)			ALK	RGB(0,0,255)	UNKNOWN	SYBR	None
84	D12	CY D 11-29 T	RGB(51,161,201)			ALK	RGB(0,0,255)	UNKNOWN	SYBR	None
85	D13	CY L 11-38 U	RGB(142,56,142)			ALK	RGB(0,0,255)	UNKNOWN	SYBR	None
86	D14	CY D 11-18 U	RGB(238,18,137)			ALK	RGB(0,0,255)	UNKNOWN	SYBR	None
87	D15	CY L 11-38 T	RGB(198,113,113)			ALK	RGB(0,0,255)	UNKNOWN	SYBR	None
88	D16	CY D 11-18 T	RGB(176,23,31)			ALK	RGB(0,0,255)	UNKNOWN	SYBR	None
89	D17	CY B 13-68 U	RGB(0,0,255)			ALK	RGB(0,0,255)	UNKNOWN	SYBR	None
90	D18	CY A 11-16 U	RGB(238,121,66)			ALK	RGB(0,0,255)	UNKNOWN	SYBR	None
91	D19	CY B 13-68 T	RGB(0,139,69)			ALK	RGB(0,0,255)	UNKNOWN	SYBR	None
92	D20	CY A 11-16 T	RGB(142,56,142)			ALK	RGB(0,0,255)	UNKNOWN	SYBR	None
93	D21	CY B 12-40 U	RGB(255,127,0)			ALK	RGB(0,0,255)	UNKNOWN	SYBR	None
94	D22	CY A 11-14 U	RGB(198,113,113)			ALK	RGB(0,0,255)	UNKNOWN	SYBR	None
95	D23	CY B 12-40 T	RGB(139,137,112)			ALK	RGB(0,0,255)	UNKNOWN	SYBR	None
96	D24	CY A 11-14 T	RGB(0,245,255)			ALK	RGB(0,0,255)	UNKNOWN	SYBR	None
97	E1	CY L 13-126 U	RGB(176,23,31)			ALK	RGB(0,0,255)	UNKNOWN	SYBR	None
98	E2	CY L 11-30 U	RGB(0,245,255)			ALK	RGB(0,0,255)	UNKNOWN	SYBR	None
99	E3	CY L 13-126 T	RGB(0,0,255)			ALK	RGB(0,0,255)	UNKNOWN	SYBR	None
100	E4	CY L 11-30 T	RGB(238,220,130)			ALK	RGB(0,0,255)	UNKNOWN	SYBR	None
101	E5	CY L 13-125 U	RGB(0,139,69)			ALK	RGB(0,0,255)	UNKNOWN	SYBR	None
102	E6	CY D 13-55 U	RGB(238,238,0)			ALK	RGB(0,0,255)	UNKNOWN	SYBR	None
103	E7	CY L 13-125 T	RGB(255,127,0)			ALK	RGB(0,0,255)	UNKNOWN	SYBR	None
104	E8	CY D 13-55 T	RGB(142,142,56)			ALK	RGB(0,0,255)	UNKNOWN	SYBR	None
105	E9	CY L 13-124 U	RGB(139,137,112)			ALK	RGB(0,0,255)	UNKNOWN	SYBR	None
106	E10	CY D 11-29 U	RGB(238,44,44)			ALK	RGB(0,0,255)	UNKNOWN	SYBR	None
107	E11	CY L 13-124 T	RGB(238,121,66)			ALK	RGB(0,0,255)	UNKNOWN	SYBR	None
108	E12	CY D 11-29 T	RGB(51,161,201)			ALK	RGB(0,0,255)	UNKNOWN	SYBR	None
109	E13	CY L 11-38 U	RGB(142,56,142)			ALK	RGB(0,0,255)	UNKNOWN	SYBR	None
110	E14	CY D 11-18 U	RGB(238,18,137)			ALK	RGB(0,0,255)	UNKNOWN	SYBR	None
111	E15	CY L 11-38 T	RGB(198,113,113)			ALK	RGB(0,0,255)	UNKNOWN	SYBR	None
112	E16	CY D 11-18 T	RGB(176,23,31)			ALK	RGB(0,0,255)	UNKNOWN	SYBR	None
113	E17	CY B 13-68 U	RGB(0,0,255)			ALK	RGB(0,0,255)	UNKNOWN	SYBR	None
114	E18	CY A 11-16 U	RGB(238,121,66)			ALK	RGB(0,0,255)	UNKNOWN	SYBR	None
115	E19	CY B 13-68 T	RGB(0,139,69)			ALK	RGB(0,0,255)	UNKNOWN	SYBR	None
116	E20	CY A 11-16 T	RGB(142,56,142)			ALK	RGB(0,0,255)	UNKNOWN	SYBR	None
117	E21	CY B 12-40 U	RGB(255,127,0)			ALK	RGB(0,0,255)	UNKNOWN	SYBR	None
118	E22	CY A 11-14 U	RGB(198,113,113)			ALK	RGB(0,0,255)	UNKNOWN	SYBR	None
119	E23	CY B 12-40 T	RGB(139,137,112)			ALK	RGB(0,0,255)	UNKNOWN	SYBR	None
120	E24	CY A 11-14 T	RGB(0,245,255)			ALK	RGB(0,0,255)	UNKNOWN	SYBR	None
121	F1	CY L 13-126 U	RGB(176,23,31)			ALK	RGB(0,0,255)	UNKNOWN	SYBR	None
122	F2	CY L 11-30 U	RGB(0,245,255)			ALK	RGB(0,0,255)	UNKNOWN	SYBR	None
123	F3	CY L 13-126 T	RGB(0,0,255)			ALK	RGB(0,0,255)	UNKNOWN	SYBR	None
124	F4	CY L 11-30 T	RGB(238,220,130)			ALK	RGB(0,0,255)	UNKNOWN	SYBR	None
125	F5	CY L 13-125 U	RGB(0,139,69)			ALK	RGB(0,0,255)	UNKNOWN	SYBR	None
126	F6	CY D 13-55 U	RGB(238,238,0)			ALK	RGB(0,0,255)	UNKNOWN	SYBR	None
127	F7	CY L 13-125 T	RGB(255,127,0)			ALK	RGB(0,0,255)	UNKNOWN	SYBR	None
128	F8	CY D 13-55 T	RGB(142,142,56)			ALK	RGB(0,0,255)	UNKNOWN	SYBR	None
129	F9	CY L 13-124 U	RGB(139,137,112)			ALK	RGB(0,0,255)	UNKNOWN	SYBR	None
130	F10	CY D 11-29 U	RGB(238,44,44)			ALK	RGB(0,0,255)	UNKNOWN	SYBR	None
131	F11	CY L 13-124 T	RGB(238,121,66)			ALK	RGB(0,0,255)	UNKNOWN	SYBR	None
132	F12	CY D 11-29 T	RGB(51,161,201)			ALK	RGB(0,0,255)	UNKNOWN	SYBR	None
133	F13	CY L 11-38 U	RGB(142,56,142)			ALK	RGB(0,0,255)	UNKNOWN	SYBR	None
134	F14	CY D 11-18 U	RGB(238,18,137)			ALK	RGB(0,0,255)	UNKNOWN	SYBR	None
135	F15	CY L 11-38 T	RGB(198,113,113)			ALK	RGB(0,0,255)	UNKNOWN	SYBR	None
136	F16	CY D 11-18 T	RGB(176,23,31)			ALK	RGB(0,0,255)	UNKNOWN	SYBR	None
137	F17	CY B 13-68 U	RGB(0,0,255)			ALK	RGB(0,0,255)	UNKNOWN	SYBR	None
138	F18	CY A 11-16 U	RGB(238,121,66)			ALK	RGB(0,0,255)	UNKNOWN	SYBR	None
139	F19	CY B 13-68 T	RGB(0,139,69)			ALK	RGB(0,0,255)	UNKNOWN	SYBR	None
140	F20	CY A 11-16 T	RGB(142,56,142)			ALK	RGB(0,0,255)	UNKNOWN	SYBR	None
141	F21	CY B 12-40 U	RGB(255,127,0)			ALK	RGB(0,0,255)	UNKNOWN	SYBR	None
142	F22	CY A 11-14 U	RGB(198,113,113)			ALK	RGB(0,0,255)	UNKNOWN	SYBR	None
143	F23	CY B 12-40 T	RGB(139,137,112)			ALK	RGB(0,0,255)	UNKNOWN	SYBR	None
144	F24	CY A 11-14 T	RGB(0,245,255)			ALK	RGB(0,0,255)	UNKNOWN	SYBR	None
145	G1	CY L 13-126 U	RGB(176,23,31)			BRCA1	RGB(0,139,69)	UNKNOWN	SYBR	None
146	G2	CY L 11-30 U	RGB(0,245,255)			BRCA1	RGB(0,139,69)	UNKNOWN	SYBR	None
147	G3	CY L 13-126 T	RGB(0,0,255)			BRCA1	RGB(0,139,69)	UNKNOWN	SYBR	None
148	G4	CY L 11-30 T	RGB(238,220,130)			BRCA1	RGB(0,139,69)	UNKNOWN	SYBR	None
149	G5	CY L 13-125 U	RGB(0,139,69)			BRCA1	RGB(0,139,69)	UNKNOWN	SYBR	None
150	G6	CY D 13-55 U	RGB(238,238,0)			BRCA1	RGB(0,139,69)	UNKNOWN	SYBR	None
151	G7	CY L 13-125 T	RGB(255,127,0)			BRCA1	RGB(0,139,69)	UNKNOWN	SYBR	None
152	G8	CY D 13-55 T	RGB(142,142,56)			BRCA1	RGB(0,139,69)	UNKNOWN	SYBR	None
153	G9	CY L 13-124 U	RGB(139,137,112)			BRCA1	RGB(0,139,69)	UNKNOWN	SYBR	None
154	G10	CY D 11-29 U	RGB(238,44,44)			BRCA1	RGB(0,139,69)	UNKNOWN	SYBR	None
155	G11	CY L 13-124 T	RGB(238,121,66)			BRCA1	RGB(0,139,69)	UNKNOWN	SYBR	None
156	G12	CY D 11-29 T	RGB(51,161,201)			BRCA1	RGB(0,139,69)	UNKNOWN	SYBR	None
157	G13	CY L 11-38 U	RGB(142,56,142)			BRCA1	RGB(0,139,69)	UNKNOWN	SYBR	None
158	G14	CY D 11-18 U	RGB(238,18,137)			BRCA1	RGB(0,139,69)	UNKNOWN	SYBR	None
159	G15	CY L 11-38 T	RGB(198,113,113)			BRCA1	RGB(0,139,69)	UNKNOWN	SYBR	None
160	G16	CY D 11-18 T	RGB(176,23,31)			BRCA1	RGB(0,139,69)	UNKNOWN	SYBR	None
161	G17	CY B 13-68 U	RGB(0,0,255)			BRCA1	RGB(0,139,69)	UNKNOWN	SYBR	None
162	G18	CY A 11-16 U	RGB(238,121,66)			BRCA1	RGB(0,139,69)	UNKNOWN	SYBR	None
163	G19	CY B 13-68 T	RGB(0,139,69)			BRCA1	RGB(0,139,69)	UNKNOWN	SYBR	None
164	G20	CY A 11-16 T	RGB(142,56,142)			BRCA1	RGB(0,139,69)	UNKNOWN	SYBR	None
165	G21	CY B 12-40 U	RGB(255,127,0)			BRCA1	RGB(0,139,69)	UNKNOWN	SYBR	None
166	G22	CY A 11-14 U	RGB(198,113,113)			BRCA1	RGB(0,139,69)	UNKNOWN	SYBR	None
167	G23	CY B 12-40 T	RGB(139,137,112)			BRCA1	RGB(0,139,69)	UNKNOWN	SYBR	None
168	G24	CY A 11-14 T	RGB(0,245,255)			BRCA1	RGB(0,139,69)	UNKNOWN	SYBR	None
169	H1	CY L 13-126 U	RGB(176,23,31)			BRCA1	RGB(0,139,69)	UNKNOWN	SYBR	None
170	H2	CY L 11-30 U	RGB(0,245,255)			BRCA1	RGB(0,139,69)	UNKNOWN	SYBR	None
171	H3	CY L 13-126 T	RGB(0,0,255)			BRCA1	RGB(0,139,69)	UNKNOWN	SYBR	None
172	H4	CY L 11-30 T	RGB(238,220,130)			BRCA1	RGB(0,139,69)	UNKNOWN	SYBR	None
173	H5	CY L 13-125 U	RGB(0,139,69)			BRCA1	RGB(0,139,69)	UNKNOWN	SYBR	None
174	H6	CY D 13-55 U	RGB(238,238,0)			BRCA1	RGB(0,139,69)	UNKNOWN	SYBR	None
175	H7	CY L 13-125 T	RGB(255,127,0)			BRCA1	RGB(0,139,69)	UNKNOWN	SYBR	None
176	H8	CY D 13-55 T	RGB(142,142,56)			BRCA1	RGB(0,139,69)	UNKNOWN	SYBR	None
177	H9	CY L 13-124 U	RGB(139,137,112)			BRCA1	RGB(0,139,69)	UNKNOWN	SYBR	None
178	H10	CY D 11-29 U	RGB(238,44,44)			BRCA1	RGB(0,139,69)	UNKNOWN	SYBR	None
179	H11	CY L 13-124 T	RGB(238,121,66)			BRCA1	RGB(0,139,69)	UNKNOWN	SYBR	None
180	H12	CY D 11-29 T	RGB(51,161,201)			BRCA1	RGB(0,139,69)	UNKNOWN	SYBR	None
181	H13	CY L 11-38 U	RGB(142,56,142)			BRCA1	RGB(0,139,69)	UNKNOWN	SYBR	None
182	H14	CY D 11-18 U	RGB(238,18,137)			BRCA1	RGB(0,139,69)	UNKNOWN	SYBR	None
183	H15	CY L 11-38 T	RGB(198,113,113)			BRCA1	RGB(0,139,69)	UNKNOWN	SYBR	None
184	H16	CY D 11-18 T	RGB(176,23,31)			BRCA1	RGB(0,139,69)	UNKNOWN	SYBR	None
185	H17	CY B 13-68 U	RGB(0,0,255)			BRCA1	RGB(0,139,69)	UNKNOWN	SYBR	None
186	H18	CY A 11-16 U	RGB(238,121,66)			BRCA1	RGB(0,139,69)	UNKNOWN	SYBR	None
187	H19	CY B 13-68 T	RGB(0,139,69)			BRCA1	RGB(0,139,69)	UNKNOWN	SYBR	None
188	H20	CY A 11-16 T	RGB(142,56,142)			BRCA1	RGB(0,139,69)	UNKNOWN	SYBR	None
189	H21	CY B 12-40 U	RGB(255,127,0)			BRCA1	RGB(0,139,69)	UNKNOWN	SYBR	None
190	H22	CY A 11-14 U	RGB(198,113,113)			BRCA1	RGB(0,139,69)	UNKNOWN	SYBR	None
191	H23	CY B 12-40 T	RGB(139,137,112)			BRCA1	RGB(0,139,69)	UNKNOWN	SYBR	None
192	H24	CY A 11-14 T	RGB(0,245,255)			BRCA1	RGB(0,139,69)	UNKNOWN	SYBR	None
193	I1	CY L 13-126 U	RGB(176,23,31)			BRCA1	RGB(0,139,69)	UNKNOWN	SYBR	None
194	I2	CY L 11-30 U	RGB(0,245,255)			BRCA1	RGB(0,139,69)	UNKNOWN	SYBR	None
195	I3	CY L 13-126 T	RGB(0,0,255)			BRCA1	RGB(0,139,69)	UNKNOWN	SYBR	None
196	I4	CY L 11-30 T	RGB(238,220,130)			BRCA1	RGB(0,139,69)	UNKNOWN	SYBR	None
197	I5	CY L 13-125 U	RGB(0,139,69)			BRCA1	RGB(0,139,69)	UNKNOWN	SYBR	None
198	I6	CY D 13-55 U	RGB(238,238,0)			BRCA1	RGB(0,139,69)	UNKNOWN	SYBR	None
199	I7	CY L 13-125 T	RGB(255,127,0)			BRCA1	RGB(0,139,69)	UNKNOWN	SYBR	None
200	I8	CY D 13-55 T	RGB(142,142,56)			BRCA1	RGB(0,139,69)	UNKNOWN	SYBR	None
201	I9	CY L 13-124 U	RGB(139,137,112)			BRCA1	RGB(0,139,69)	UNKNOWN	SYBR	None
202	I10	CY D 11-29 U	RGB(238,44,44)			BRCA1	RGB(0,139,69)	UNKNOWN	SYBR	None
203	I11	CY L 13-124 T	RGB(238,121,66)			BRCA1	RGB(0,139,69)	UNKNOWN	SYBR	None
204	I12	CY D 11-29 T	RGB(51,161,201)			BRCA1	RGB(0,139,69)	UNKNOWN	SYBR	None
205	I13	CY L 11-38 U	RGB(142,56,142)			BRCA1	RGB(0,139,69)	UNKNOWN	SYBR	None
206	I14	CY D 11-18 U	RGB(238,18,137)			BRCA1	RGB(0,139,69)	UNKNOWN	SYBR	None
207	I15	CY L 11-38 T	RGB(198,113,113)			BRCA1	RGB(0,139,69)	UNKNOWN	SYBR	None
208	I16	CY D 11-18 T	RGB(176,23,31)			BRCA1	RGB(0,139,69)	UNKNOWN	SYBR	None
209	I17	CY B 13-68 U	RGB(0,0,255)			BRCA1	RGB(0,139,69)	UNKNOWN	SYBR	None
210	I18	CY A 11-16 U	RGB(238,121,66)			BRCA1	RGB(0,139,69)	UNKNOWN	SYBR	None
211	I19	CY B 13-68 T	RGB(0,139,69)			BRCA1	RGB(0,139,69)	UNKNOWN	SYBR	None
212	I20	CY A 11-16 T	RGB(142,56,142)			BRCA1	RGB(0,139,69)	UNKNOWN	SYBR	None
213	I21	CY B 12-40 U	RGB(255,127,0)			BRCA1	RGB(0,139,69)	UNKNOWN	SYBR	None
214	I22	CY A 11-14 U	RGB(198,113,113)			BRCA1	RGB(0,139,69)	UNKNOWN	SYBR	None
215	I23	CY B 12-40 T	RGB(139,137,112)			BRCA1	RGB(0,139,69)	UNKNOWN	SYBR	None
216	I24	CY A 11-14 T	RGB(0,245,255)			BRCA1	RGB(0,139,69)	UNKNOWN	SYBR	None
217	J1	CY L 13-126 U	RGB(176,23,31)			PDCD1	RGB(238,238,0)	UNKNOWN	SYBR	None
218	J2	CY L 11-30 U	RGB(0,245,255)			PDCD1	RGB(238,238,0)	UNKNOWN	SYBR	None
219	J3	CY L 13-126 T	RGB(0,0,255)			PDCD1	RGB(238,238,0)	UNKNOWN	SYBR	None
220	J4	CY L 11-30 T	RGB(238,220,130)			PDCD1	RGB(238,238,0)	UNKNOWN	SYBR	None
221	J5	CY L 13-125 U	RGB(0,139,69)			PDCD1	RGB(238,238,0)	UNKNOWN	SYBR	None
222	J6	CY D 13-55 U	RGB(238,238,0)			PDCD1	RGB(238,238,0)	UNKNOWN	SYBR	None
223	J7	CY L 13-125 T	RGB(255,127,0)			PDCD1	RGB(238,238,0)	UNKNOWN	SYBR	None
224	J8	CY D 13-55 T	RGB(142,142,56)			PDCD1	RGB(238,238,0)	UNKNOWN	SYBR	None
225	J9	CY L 13-124 U	RGB(139,137,112)			PDCD1	RGB(238,238,0)	UNKNOWN	SYBR	None
226	J10	CY D 11-29 U	RGB(238,44,44)			PDCD1	RGB(238,238,0)	UNKNOWN	SYBR	None
227	J11	CY L 13-124 T	RGB(238,121,66)			PDCD1	RGB(238,238,0)	UNKNOWN	SYBR	None
228	J12	CY D 11-29 T	RGB(51,161,201)			PDCD1	RGB(238,238,0)	UNKNOWN	SYBR	None
229	J13	CY L 11-38 U	RGB(142,56,142)			PDCD1	RGB(238,238,0)	UNKNOWN	SYBR	None
230	J14	CY D 11-18 U	RGB(238,18,137)			PDCD1	RGB(238,238,0)	UNKNOWN	SYBR	None
231	J15	CY L 11-38 T	RGB(198,113,113)			PDCD1	RGB(238,238,0)	UNKNOWN	SYBR	None
232	J16	CY D 11-18 T	RGB(176,23,31)			PDCD1	RGB(238,238,0)	UNKNOWN	SYBR	None
233	J17	CY B 13-68 U	RGB(0,0,255)			PDCD1	RGB(238,238,0)	UNKNOWN	SYBR	None
234	J18	CY A 11-16 U	RGB(238,121,66)			PDCD1	RGB(238,238,0)	UNKNOWN	SYBR	None
235	J19	CY B 13-68 T	RGB(0,139,69)			PDCD1	RGB(238,238,0)	UNKNOWN	SYBR	None
236	J20	CY A 11-16 T	RGB(142,56,142)			PDCD1	RGB(238,238,0)	UNKNOWN	SYBR	None
237	J21	CY B 12-40 U	RGB(255,127,0)			PDCD1	RGB(238,238,0)	UNKNOWN	SYBR	None
238	J22	CY A 11-14 U	RGB(198,113,113)			PDCD1	RGB(238,238,0)	UNKNOWN	SYBR	None
239	J23	CY B 12-40 T	RGB(139,137,112)			PDCD1	RGB(238,238,0)	UNKNOWN	SYBR	None
240	J24	CY A 11-14 T	RGB(0,245,255)			PDCD1	RGB(238,238,0)	UNKNOWN	SYBR	None
241	K1	CY L 13-126 U	RGB(176,23,31)			PDCD1	RGB(238,238,0)	UNKNOWN	SYBR	None
242	K2	CY L 11-30 U	RGB(0,245,255)			PDCD1	RGB(238,238,0)	UNKNOWN	SYBR	None
243	K3	CY L 13-126 T	RGB(0,0,255)			PDCD1	RGB(238,238,0)	UNKNOWN	SYBR	None
244	K4	CY L 11-30 T	RGB(238,220,130)			PDCD1	RGB(238,238,0)	UNKNOWN	SYBR	None
245	K5	CY L 13-125 U	RGB(0,139,69)			PDCD1	RGB(238,238,0)	UNKNOWN	SYBR	None
246	K6	CY D 13-55 U	RGB(238,238,0)			PDCD1	RGB(238,238,0)	UNKNOWN	SYBR	None
247	K7	CY L 13-125 T	RGB(255,127,0)			PDCD1	RGB(238,238,0)	UNKNOWN	SYBR	None
248	K8	CY D 13-55 T	RGB(142,142,56)			PDCD1	RGB(238,238,0)	UNKNOWN	SYBR	None
249	K9	CY L 13-124 U	RGB(139,137,112)			PDCD1	RGB(238,238,0)	UNKNOWN	SYBR	None
250	K10	CY D 11-29 U	RGB(238,44,44)			PDCD1	RGB(238,238,0)	UNKNOWN	SYBR	None
251	K11	CY L 13-124 T	RGB(238,121,66)			PDCD1	RGB(238,238,0)	UNKNOWN	SYBR	None
252	K12	CY D 11-29 T	RGB(51,161,201)			PDCD1	RGB(238,238,0)	UNKNOWN	SYBR	None
253	K13	CY L 11-38 U	RGB(142,56,142)			PDCD1	RGB(238,238,0)	UNKNOWN	SYBR	None
254	K14	CY D 11-18 U	RGB(238,18,137)			PDCD1	RGB(238,238,0)	UNKNOWN	SYBR	None
255	K15	CY L 11-38 T	RGB(198,113,113)			PDCD1	RGB(238,238,0)	UNKNOWN	SYBR	None
256	K16	CY D 11-18 T	RGB(176,23,31)			PDCD1	RGB(238,238,0)	UNKNOWN	SYBR	None
257	K17	CY B 13-68 U	RGB(0,0,255)			PDCD1	RGB(238,238,0)	UNKNOWN	SYBR	None
258	K18	CY A 11-16 U	RGB(238,121,66)			PDCD1	RGB(238,238,0)	UNKNOWN	SYBR	None
259	K19	CY B 13-68 T	RGB(0,139,69)			PDCD1	RGB(238,238,0)	UNKNOWN	SYBR	None
260	K20	CY A 11-16 T	RGB(142,56,142)			PDCD1	RGB(238,238,0)	UNKNOWN	SYBR	None
261	K21	CY B 12-40 U	RGB(255,127,0)			PDCD1	RGB(238,238,0)	UNKNOWN	SYBR	None
262	K22	CY A 11-14 U	RGB(198,113,113)			PDCD1	RGB(238,238,0)	UNKNOWN	SYBR	None
263	K23	CY B 12-40 T	RGB(139,137,112)			PDCD1	RGB(238,238,0)	UNKNOWN	SYBR	None
264	K24	CY A 11-14 T	RGB(0,245,255)			PDCD1	RGB(238,238,0)	UNKNOWN	SYBR	None
265	L1	CY L 13-126 U	RGB(176,23,31)			PDCD1	RGB(238,238,0)	UNKNOWN	SYBR	None
266	L2	CY L 11-30 U	RGB(0,245,255)			PDCD1	RGB(238,238,0)	UNKNOWN	SYBR	None
267	L3	CY L 13-126 T	RGB(0,0,255)			PDCD1	RGB(238,238,0)	UNKNOWN	SYBR	None
268	L4	CY L 11-30 T	RGB(238,220,130)			PDCD1	RGB(238,238,0)	UNKNOWN	SYBR	None
269	L5	CY L 13-125 U	RGB(0,139,69)			PDCD1	RGB(238,238,0)	UNKNOWN	SYBR	None
270	L6	CY D 13-55 U	RGB(238,238,0)			PDCD1	RGB(238,238,0)	UNKNOWN	SYBR	None
271	L7	CY L 13-125 T	RGB(255,127,0)			PDCD1	RGB(238,238,0)	UNKNOWN	SYBR	None
272	L8	CY D 13-55 T	RGB(142,142,56)			PDCD1	RGB(238,238,0)	UNKNOWN	SYBR	None
273	L9	CY L 13-124 U	RGB(139,137,112)			PDCD1	RGB(238,238,0)	UNKNOWN	SYBR	None
274	L10	CY D 11-29 U	RGB(238,44,44)			PDCD1	RGB(238,238,0)	UNKNOWN	SYBR	None
275	L11	CY L 13-124 T	RGB(238,121,66)			PDCD1	RGB(238,238,0)	UNKNOWN	SYBR	None
276	L12	CY D 11-29 T	RGB(51,161,201)			PDCD1	RGB(238,238,0)	UNKNOWN	SYBR	None
277	L13	CY L 11-38 U	RGB(142,56,142)			PDCD1	RGB(238,238,0)	UNKNOWN	SYBR	None
278	L14	CY D 11-18 U	RGB(238,18,137)			PDCD1	RGB(238,238,0)	UNKNOWN	SYBR	None
279	L15	CY L 11-38 T	RGB(198,113,113)			PDCD1	RGB(238,238,0)	UNKNOWN	SYBR	None
280	L16	CY D 11-18 T	RGB(176,23,31)			PDCD1	RGB(238,238,0)	UNKNOWN	SYBR	None
281	L17	CY B 13-68 U	RGB(0,0,255)			PDCD1	RGB(238,238,0)	UNKNOWN	SYBR	None
282	L18	CY A 11-16 U	RGB(238,121,66)			PDCD1	RGB(238,238,0)	UNKNOWN	SYBR	None
283	L19	CY B 13-68 T	RGB(0,139,69)			PDCD1	RGB(238,238,0)	UNKNOWN	SYBR	None
284	L20	CY A 11-16 T	RGB(142,56,142)			PDCD1	RGB(238,238,0)	UNKNOWN	SYBR	None
285	L21	CY B 12-40 U	RGB(255,127,0)			PDCD1	RGB(238,238,0)	UNKNOWN	SYBR	None
286	L22	CY A 11-14 U	RGB(198,113,113)			PDCD1	RGB(238,238,0)	UNKNOWN	SYBR	None
287	L23	CY B 12-40 T	RGB(139,137,112)			PDCD1	RGB(238,238,0)	UNKNOWN	SYBR	None
288	L24	CY A 11-14 T	RGB(0,245,255)			PDCD1	RGB(238,238,0)	UNKNOWN	SYBR	None
289	M1
290	M2
291	M3
292	M4
293	M5
294	M6
295	M7
296	M8
297	M9
298	M10
299	M11
300	M12
301	M13
302	M14
303	M15
304	M16
305	M17
306	M18
307	M19
308	M20
309	M21
310	M22
311	M23
312	M24
313	N1
314	N2
315	N3
316	N4
317	N5
318	N6
319	N7
320	N8
321	N9
322	N10
323	N11
324	N12
325	N13
326	N14
327	N15
328	N16
329	N17
330	N18
331	N19
332	N20
333	N21
334	N22
335	N23
336	N24
337	O1
338	O2
339	O3
340	O4
341	O5
342	O6
343	O7
344	O8
345	O9
346	O10
347	O11
348	O12
349	O13
350	O14
351	O15
352	O16
353	O17
354	O18
355	O19
356	O20
357	O21
358	O22
359	O23
360	O24
361	P1
362	P2
363	P3
364	P4
365	P5
366	P6
367	P7
368	P8
369	P9
370	P10
371	P11
372	P12
373	P13
374	P14
375	P15
376	P16
377	P17
378	P18
379	P19
380	P20
381	P21					PDCD1	RGB(238,238,0)	NTC	SYBR	None
382	P22					BRCA1	RGB(0,139,69)	NTC	SYBR	None
383	P23					ALK	RGB(0,0,255)	NTC	SYBR	None
384	P24					HMBS	RGB(176,23,31)	NTC	SYBR	None

## Sheet: Amplification Data
Block Type	384-Well Block
Calibration Background is expired	Yes
Calibration Background performed on	2016-02-12 13:07:10 PM PST
Calibration FAM is expired	Yes
Calibration FAM performed on	2016-02-12 14:10:50 PM PST
Calibration NED is expired	Yes
Calibration NED performed on	2014-11-24 13:16:28 PM PST
Calibration ROI is expired	Yes
Calibration ROI performed on	2016-02-12 12:57:08 PM PST
Calibration ROX is expired	Yes
Calibration ROX performed on	2016-02-12 14:26:17 PM PST
Calibration SYBR is expired	Yes
Calibration SYBR performed on	2016-02-12 14:49:42 PM PST
Calibration TAMRA is expired	Yes
Calibration TAMRA performed on	2016-02-12 14:38:45 PM PST
Calibration Uniformity is expired	Yes
Calibration Uniformity performed on	2016-02-12 13:16:49 PM PST
Calibration VIC is expired	Yes
Calibration VIC performed on	2016-02-12 14:01:38 PM PST
Chemistry	SYBR_GREEN
Experiment Barcode
Experiment Comments
Experiment File Name	D:\Documents and Settings\INSTR-USER\Viia7 Experiments\Kenney Lab\2016-11-21 101524 BALD ALK BRCA1 PDCD1 HMBS.eds
Experiment Name	2016-11-21 101524 BALD ALK BRCA1 PDCD1 HMBS
Experiment Run Start Time	2016-11-21 11:10:35 AM PST
Experiment Run Stop Time	2016-11-21 12:57:52 PM PST
Experiment Type	Comparative Cт (ΔΔCт)
Experiment User Name	SHARI
Instrument Name	278880281
Instrument Serial Number	278880281
Instrument Type	ViiA(TM) 7 System
Passive Reference	ROX
Quantification Cycle Method	Ct
Signal Smoothing On	true
Stage/ Cycle where Analysis is performed	Stage 2, Step 2
Well	Cycle	Target Name	Rn	Delta Rn
1	1	HMBS	1.07496	-0.00349422
1	2	HMBS	1.08519	-0.0276662
1	3	HMBS	1.12841	-0.0188472
1	4	HMBS	1.16736	-0.0143065
1	5	HMBS	1.20313	-0.0129367
1	6	HMBS	1.23456	-0.015914
1	7	HMBS	1.27334	-0.0115419
1	8	HMBS	1.31464	-0.00464541
1	9	HMBS	1.36318	0.00949268
1	10	HMBS	1.43966	0.0515651
1	11	HMBS	1.48701	0.0645117
1	12	HMBS	1.48904	0.0321376
1	13	HMBS	1.4994	0.00808894
1	14	HMBS	1.51493	-0.0107839
1	15	HMBS	1.54941	-0.0107021
1	16	HMBS	1.56863	-0.0258867
1	17	HMBS	1.58869	-0.0402315
1	18	HMBS	1.62676	-0.0365743
1	19	HMBS	1.67611	-0.0216286
1	20	HMBS	1.7549	0.0227611
1	21	HMBS	1.88911	0.12257
1	22	HMBS	2.13901	0.338067
1	23	HMBS	2.52983	0.694475
1	24	HMBS	3.08255	1.21279
1	25	HMBS	3.66269	1.75853
1	26	HMBS	4.21716	2.2786
1	27	HMBS	4.74638	2.77341
1	28	HMBS	5.18832	3.18094
1	29	HMBS	5.61224	3.57046
1	30	HMBS	5.94864	3.87246
1	31	HMBS	6.24309	4.1325
1	32	HMBS	6.44898	4.30398
1	33	HMBS	6.62446	4.44506
1	34	HMBS	6.77362	4.55982
1	35	HMBS	6.88816	4.63995
1	36	HMBS	6.99067	4.70806
1	37	HMBS	7.17823	4.86121
1	38	HMBS	7.33116	4.97974
1	39	HMBS	7.39295	5.00712
1	40	HMBS	7.45712	5.03689
2	1	HMBS	2.90078	-0.13944
2	2	HMBS	2.97227	-0.10483
2	3	HMBS	3.07424	-0.0397415
2	4	HMBS	3.1378	-0.0130629
2	5	HMBS	3.17708	-0.0106609
2	6	HMBS	3.22986	0.00524193
2	7	HMBS	3.29981	0.038308
2	8	HMBS	3.31995	0.0215701
2	9	HMBS	3.34685	0.0115923
2	10	HMBS	3.3954	0.0232655
2	11	HMBS	3.4308	0.0217845
2	12	HMBS	3.43901	-0.0068903
2	13	HMBS	3.46395	-0.0188293
2	14	HMBS	3.49828	-0.0213806
2	15	HMBS	3.54834	-0.00820294
2	16	HMBS	3.60253	0.00910818
2	17	HMBS	3.63236	0.00206008
2	18	HMBS	3.65302	-0.0141621
2	19	HMBS	3.7001	-0.00395421
2	20	HMBS	3.8124	0.071461
2	21	HMBS	3.96237	0.184556
2	22	HMBS	4.17536	0.360658
2	23	HMBS	4.47879	0.627215
2	24	HMBS	4.85217	0.963709
2	25	HMBS	5.23282	1.30748
2	26	HMBS	5.60369	1.64147
2	27	HMBS	5.95562	1.95652
2	28	HMBS	6.28421	2.24823
2	29	HMBS	6.58257	2.50971
2	30	HMBS	6.81235	2.70261
2	31	HMBS	6.99142	2.8448
2	32	HMBS	7.17554	2.99204
2	33	HMBS	7.36396	3.14358
2	34	HMBS	7.4617	3.20444
2	35	HMBS	7.57472	3.28058
2	36	HMBS	7.72729	3.39627
2	37	HMBS	7.86553	3.49763
2	38	HMBS	7.94033	3.53556
2	39	HMBS	7.97379	3.53213
2	40	HMBS	7.98422	3.50569
3	1	HMBS	1.15571	-0.000176476
3	2	HMBS	1.17783	0.000637548
3	3	HMBS	1.20672	0.00822493
3	4	HMBS	1.22613	0.00633063
3	5	HMBS	1.24534	0.00424191
3	6	HMBS	1.25976	-0.00264451
3	7	HMBS	1.27962	-0.00408747
3	8	HMBS	1.29845	-0.00655802
3	9	HMBS	1.32448	-0.00183465
3	10	HMBS	1.35384	0.00622194
3	11	HMBS	1.36751	-0.00140882
3	12	HMBS	1.37186	-0.0183659
3	13	HMBS	1.39988	-0.0116489
3	14	HMBS	1.42518	-0.007649
3	15	HMBS	1.45844	0.00430561
3	16	HMBS	1.48841	0.0129739
3	17	HMBS	1.50864	0.0118984
3	18	HMBS	1.54021	0.0221579
3	19	HMBS	1.59807	0.0587168
3	20	HMBS	1.68478	0.124127
3	21	HMBS	1.81939	0.237436
3	22	HMBS	2.06319	0.459926
3	23	HMBS	2.46862	0.844052
3	24	HMBS	3.03051	1.38464
3	25	HMBS	3.68967	2.0225
3	26	HMBS	4.32738	2.6389
3	27	HMBS	4.9117	3.20192
3	28	HMBS	5.41415	3.68307
3	29	HMBS	5.8503	4.09791
3	30	HMBS	6.21838	4.44469
3	31	HMBS	6.49844	4.70344
3	32	HMBS	6.74047	4.92417
3	33	HMBS	6.9595	5.1219
3	34	HMBS	7.1069	5.248
3	35	HMBS	7.25544	5.37523
3	36	HMBS	7.44038	5.53887
3	37	HMBS	7.61063	5.68782
3	38	HMBS	7.73919	5.79507
3	39	HMBS	7.81227	5.84685
3	40	HMBS	7.87983	5.8931
4	1	HMBS	1.33879	-0.0774528
4	2	HMBS	1.37854	-0.0627133
4	3	HMBS	1.44289	-0.0233916
4	4	HMBS	1.49712	0.00582624
4	5	HMBS	1.51708	0.000767628
4	6	HMBS	1.54091	-0.000429673
4	7	HMBS	1.57185	0.00549149
4	8	HMBS	1.59457	0.00319591
4	9	HMBS	1.62439	0.00799162
4	10	HMBS	1.65059	0.00917517
4	11	HMBS	1.67617	0.00973227
4	12	HMBS	1.69549	0.00403696
4	13	HMBS	1.71823	0.00175974
4	14	HMBS	1.73285	-0.00864087
4	15	HMBS	1.75775	-0.0087604
4	16	HMBS	1.78478	-0.00675443
4	17	HMBS	1.81102	-0.00552511
4	18	HMBS	1.85545	0.0138841
4	19	HMBS	1.91714	0.050549
4	20	HMBS	2.01854	0.126932
4	21	HMBS	2.20239	0.285762
4	22	HMBS	2.51369	0.572039
4	23	HMBS	2.98308	1.01642
4	24	HMBS	3.56195	1.57026
4	25	HMBS	4.15498	2.13828
4	26	HMBS	4.7083	2.66657
4	27	HMBS	5.21048	3.14374
4	28	HMBS	5.63769	3.54593
4	29	HMBS	6.00238	3.8856
4	30	HMBS	6.30441	4.16261
4	31	HMBS	6.56463	4.39781
4	32	HMBS	6.79138	4.59954
4	33	HMBS	7.01407	4.79721
4	34	HMBS	7.16648	4.9246
4	35	HMBS	7.30118	5.03428
4	36	HMBS	7.46292	5.171
4	37	HMBS	7.61356	5.29662
4	38	HMBS	7.73246	5.3905
4	39	HMBS	7.8026	5.43562
4	40	HMBS	7.86836	5.47636
5	1	HMBS	2.42258	-0.063145
5	2	HMBS	2.47945	-0.0391331
5	3	HMBS	2.53661	-0.0148305
5	4	HMBS	2.57858	-0.00572185
5	5	HMBS	2.61528	-0.00188225
5	6	HMBS	2.65434	0.0043177
5	7	HMBS	2.69371	0.0108278
5	8	HMBS	2.72343	0.00768796
5	9	HMBS	2.75152	0.0029247
5	10	HMBS	2.78886	0.00740589
5	11	HMBS	2.82331	0.00899124
5	12	HMBS	2.84312	-0.00405611
5	13	HMBS	2.86932	-0.0107148
5	14	HMBS	2.91366	0.000770171
5	15	HMBS	2.95409	0.00833673
5	16	HMBS	2.97322	-0.00539703
5	17	HMBS	3.00281	-0.00865968
5	18	HMBS	3.04773	0.00339821
5	19	HMBS	3.09084	0.0136451
5	20	HMBS	3.17479	0.0647438
5	21	HMBS	3.30704	0.164132
5	22	HMBS	3.52468	0.348911
5	23	HMBS	3.87947	0.67084
5	24	HMBS	4.35628	1.11479
5	25	HMBS	4.85927	1.58493
5	26	HMBS	5.34632	2.03912
5	27	HMBS	5.80907	2.469
5	28	HMBS	6.19998	2.82706
5	29	HMBS	6.55718	3.15139
5	30	HMBS	6.85569	3.41705
5	31	HMBS	7.13142	3.65992
5	32	HMBS	7.38012	3.87576
5	33	HMBS	7.5745	4.03728
5	34	HMBS	7.73118	4.1611
5	35	HMBS	7.86907	4.26614
5	36	HMBS	8.01578	4.37999
5	37	HMBS	8.15615	4.48749
5	38	HMBS	8.24354	4.54202
5	39	HMBS	8.32371	4.58934
5	40	HMBS	8.40833	4.6411
6	1	HMBS	2.77199	-0.0893572
6	2	HMBS	2.81948	-0.0783064
6	3	HMBS	2.90442	-0.0298043
6	4	HMBS	2.95884	-0.0118208
6	5	HMBS	2.99922	-0.00787941
6	6	HMBS	3.04498	0.00143379
6	7	HMBS	3.09821	0.0182214
6	8	HMBS	3.13553	0.0191056
6	9	HMBS	3.16841	0.015547
6	10	HMBS	3.19725	0.00794846
6	11	HMBS	3.23084	0.00510088
6	12	HMBS	3.27814	0.0159576
6	13	HMBS	3.3109	0.0122758
6	14	HMBS	3.32737	-0.0076974
6	15	HMBS	3.36719	-0.00431367
6	16	HMBS	3.3957	-0.0122443
6	17	HMBS	3.42255	-0.0218306
6	18	HMBS	3.46901	-0.0118136
6	19	HMBS	3.53616	0.0188984
6	20	HMBS	3.65141	0.0977028
6	21	HMBS	3.81453	0.224382
6	22	HMBS	4.10521	0.47862
6	23	HMBS	4.56844	0.90542
6	24	HMBS	5.15847	1.459
6	25	HMBS	5.79024	2.05434
6	26	HMBS	6.36625	2.59391
6	27	HMBS	6.83221	3.02343
6	28	HMBS	7.30998	3.46475
6	29	HMBS	7.77868	3.89701
6	30	HMBS	8.15711	4.23901
6	31	HMBS	8.44995	4.4954
6	32	HMBS	8.71328	4.7223
6	33	HMBS	8.91271	4.88528
6	34	HMBS	9.07978	5.01591
6	35	HMBS	9.27422	5.17392
6	36	HMBS	9.41816	5.28142
6	37	HMBS	9.57846	5.40528
6	38	HMBS	9.69465	5.48502
6	39	HMBS	9.86004	5.61397
6	40	HMBS	9.9524	5.6699
7	1	HMBS	1.28128	-0.0418448
7	2	HMBS	1.3067	-0.0396891
7	3	HMBS	1.35154	-0.0181182
7	4	HMBS	1.3881	-0.00482155
7	5	HMBS	1.41635	0.000156897
7	6	HMBS	1.44551	0.00605195
7	7	HMBS	1.47057	0.0078549
7	8	HMBS	1.48711	0.00112104
7	9	HMBS	1.51325	0.00400295
7	10	HMBS	1.53935	0.00683361
7	11	HMBS	1.56395	0.00817355
7	12	HMBS	1.58305	0.0040071
7	13	HMBS	1.60669	0.00437954
7	14	HMBS	1.62409	-0.00148815
7	15	HMBS	1.64921	0.000362967
7	16	HMBS	1.66863	-0.00347304
7	17	HMBS	1.68033	-0.0150436
7	18	HMBS	1.7087	-0.0099365
7	19	HMBS	1.75159	0.00968907
7	20	HMBS	1.80941	0.0442413
7	21	HMBS	1.89659	0.108152
7	22	HMBS	2.06126	0.249559
7	23	HMBS	2.34423	0.50927
7	24	HMBS	2.81046	0.952229
7	25	HMBS	3.49523	1.61374
7	26	HMBS	4.30865	2.40388
7	27	HMBS	5.09744	3.16942
7	28	HMBS	5.7999	3.84861
7	29	HMBS	6.42454	4.44999
7	30	HMBS	6.97971	4.98189
7	31	HMBS	7.42193	5.40085
7	32	HMBS	7.7512	5.70684
7	33	HMBS	8.05522	5.9876
7	34	HMBS	8.32032	6.22943
7	35	HMBS	8.54879	6.43465
7	36	HMBS	8.79126	6.65384
7	37	HMBS	8.97094	6.81026
7	38	HMBS	9.13169	6.94775
7	39	HMBS	9.24598	7.03877
7	40	HMBS	9.35378	7.1233
8	1	HMBS	1.45034	-0.0531199
8	2	HMBS	1.48738	-0.0383755
8	3	HMBS	1.52819	-0.0198637
8	4	HMBS	1.56339	-0.00696516
8	5	HMBS	1.5928	0.000148846
8	6	HMBS	1.61688	0.00192978
8	7	HMBS	1.64956	0.0123127
8	8	HMBS	1.66829	0.00874404
8	9	HMBS	1.68941	0.00757109
8	10	HMBS	1.70741	0.00326365
8	11	HMBS	1.73428	0.0078398
8	12	HMBS	1.75144	0.00270279
8	13	HMBS	1.77202	0.000980518
8	14	HMBS	1.79338	4.93231e-05
8	15	HMBS	1.81656	0.000933328
8	16	HMBS	1.83182	-0.00610281
8	17	HMBS	1.84668	-0.0135443
8	18	HMBS	1.87189	-0.0106339
8	19	HMBS	1.90742	0.00260384
8	20	HMBS	1.98183	0.0547075
8	21	HMBS	2.10121	0.151792
8	22	HMBS	2.29086	0.31915
8	23	HMBS	2.62899	0.634983
8	24	HMBS	3.16006	1.14375
8	25	HMBS	3.80264	1.76403
8	26	HMBS	4.41883	2.35792
8	27	HMBS	5.00551	2.9223
8	28	HMBS	5.51052	3.40502
8	29	HMBS	5.9481	3.8203
8	30	HMBS	6.32941	4.17932
8	31	HMBS	6.66025	4.48786
8	32	HMBS	6.88789	4.6932
8	33	HMBS	7.13209	4.9151
8	34	HMBS	7.34177	5.10248
8	35	HMBS	7.52824	5.26666
8	36	HMBS	7.68995	5.40607
8	37	HMBS	7.82346	5.51728
8	38	HMBS	7.9229	5.59443
8	39	HMBS	8.05445	5.70368
8	40	HMBS	8.1468	5.77373
9	1	HMBS	2.02495	-0.0748452
9	2	HMBS	2.07435	-0.0554587
9	3	HMBS	2.135	-0.0248334
9	4	HMBS	2.17622	-0.0136356
9	5	HMBS	2.21263	-0.00725501
9	6	HMBS	2.25871	0.00880867
9	7	HMBS	2.29217	0.0122493
9	8	HMBS	2.32191	0.0119577
9	9	HMBS	2.35283	0.0128615
9	10	HMBS	2.37972	0.00972916
9	11	HMBS	2.4126	0.0125847
9	12	HMBS	2.43922	0.00918627
9	13	HMBS	2.46571	0.00564693
9	14	HMBS	2.48774	-0.00234153
9	15	HMBS	2.51576	-0.00434592
9	16	HMBS	2.5358	-0.0143247
9	17	HMBS	2.56386	-0.0162881
9	18	HMBS	2.59627	-0.0139049
9	19	HMBS	2.64815	0.00795954
9	20	HMBS	2.74747	0.0772506
9	21	HMBS	2.90269	0.202456
9	22	HMBS	3.16116	0.430903
9	23	HMBS	3.53681	0.77653
9	24	HMBS	4.03665	1.24635
9	25	HMBS	4.57031	1.74998
9	26	HMBS	5.0605	2.21015
9	27	HMBS	5.52476	2.64438
9	28	HMBS	5.91817	3.00778
9	29	HMBS	6.25983	3.31941
9	30	HMBS	6.57451	3.60407
9	31	HMBS	6.81561	3.81515
9	32	HMBS	7.03462	4.00413
9	33	HMBS	7.23198	4.17147
9	34	HMBS	7.41745	4.32692
9	35	HMBS	7.55388	4.43333
9	36	HMBS	7.64913	4.49856
9	37	HMBS	7.75531	4.57471
9	38	HMBS	7.88899	4.67837
9	39	HMBS	8.00098	4.76034
9	40	HMBS	8.08221	4.81154
10	1	HMBS	0.73951	-0.00324633
10	2	HMBS	0.750871	-0.000823043
10	3	HMBS	0.762912	0.00227992
10	4	HMBS	0.770752	0.00118201
10	5	HMBS	0.776239	-0.00226963
10	6	HMBS	0.790081	0.00263506
10	7	HMBS	0.796745	0.000360491
10	8	HMBS	0.805035	-0.000287109
10	9	HMBS	0.813995	-0.000265289
10	10	HMBS	0.820128	-0.00307093
10	11	HMBS	0.828702	-0.0034344
10	12	HMBS	0.840287	-0.000787232
10	13	HMBS	0.84689	-0.00312224
10	14	HMBS	0.861042	0.00209109
10	15	HMBS	0.870556	0.00266729
10	16	HMBS	0.877592	0.000764654
10	17	HMBS	0.885243	-0.000521729
10	18	HMBS	0.896481	0.00177806
10	19	HMBS	0.912968	0.00932652
10	20	HMBS	0.943505	0.0309254
10	21	HMBS	0.998724	0.0772063
10	22	HMBS	1.09414	0.163687
10	23	HMBS	1.27751	0.338112
10	24	HMBS	1.58371	0.635377
10	25	HMBS	2.10656	1.14929
10	26	HMBS	2.81019	1.84398
10	27	HMBS	3.59387	2.61872
10	28	HMBS	4.32574	3.34165
10	29	HMBS	4.96616	3.97314
10	30	HMBS	5.48611	4.48415
10	31	HMBS	5.94369	4.93279
10	32	HMBS	6.31448	5.29464
10	33	HMBS	6.63908	5.6103
10	34	HMBS	6.88491	5.8472
10	35	HMBS	7.07753	6.03087
10	36	HMBS	7.25688	6.20129
10	37	HMBS	7.43622	6.3717
10	38	HMBS	7.59223	6.51876
10	39	HMBS	7.72333	6.64093
10	40	HMBS	7.85162	6.76028
11	1	HMBS	1.73163	-0.0480024
11	2	HMBS	1.76239	-0.0385648
11	3	HMBS	1.81248	-0.00978733
11	4	HMBS	1.83814	-0.00545086
11	5	HMBS	1.86172	-0.00319017
11	6	HMBS	1.8866	0.000368104
11	7	HMBS	1.91453	0.00697719
11	8	HMBS	1.93648	0.00761674
11	9	HMBS	1.95646	0.00627325
11	10	HMBS	1.97621	0.00469933
11	11	HMBS	1.99553	0.0027083
11	12	HMBS	2.01495	0.000805719
11	13	HMBS	2.03658	0.00111197
11	14	HMBS	2.05742	0.000633818
11	15	HMBS	2.07681	-0.00129129
11	16	HMBS	2.09609	-0.00333228
11	17	HMBS	2.1126	-0.00814249
11	18	HMBS	2.1374	-0.00465908
11	19	HMBS	2.17721	0.0138254
11	20	HMBS	2.24603	0.0613316
11	21	HMBS	2.36467	0.15865
11	22	HMBS	2.57416	0.346827
11	23	HMBS	2.92277	0.674116
11	24	HMBS	3.42976	1.15978
11	25	HMBS	4.05047	1.75918
11	26	HMBS	4.66477	2.35215
11	27	HMBS	5.22077	2.88684
11	28	HMBS	5.68785	3.3326
11	29	HMBS	6.11186	3.73529
11	30	HMBS	6.47154	4.07365
11	31	HMBS	6.77054	4.35133
11	32	HMBS	7.03199	4.59146
11	33	HMBS	7.24041	4.77856
11	34	HMBS	7.40804	4.92487
11	35	HMBS	7.61094	5.10645
11	36	HMBS	7.77101	5.24521
11	37	HMBS	7.88459	5.33747
11	38	HMBS	8.02096	5.45252
11	39	HMBS	8.11216	5.52239
11	40	HMBS	8.18644	5.57535
12	1	HMBS	1.8189	-0.0917838
12	2	HMBS	1.86216	-0.0759234
12	3	HMBS	1.93537	-0.0301102
12	4	HMBS	1.97959	-0.0132824
12	5	HMBS	2.01014	-0.0101348
12	6	HMBS	2.04089	-0.00677552
12	7	HMBS	2.07693	0.00186736
12	8	HMBS	2.12334	0.0208707
12	9	HMBS	2.15457	0.0247028
12	10	HMBS	2.18297	0.0257086
12	11	HMBS	2.20356	0.0189049
12	12	HMBS	2.22703	0.0149793
12	13	HMBS	2.24735	0.00790058
12	14	HMBS	2.26167	-0.00517863
12	15	HMBS	2.2885	-0.00574586
12	16	HMBS	2.30977	-0.0118694
12	17	HMBS	2.33367	-0.0153697
12	18	HMBS	2.36874	-0.00769789
12	19	HMBS	2.39507	-0.00876986
12	20	HMBS	2.42183	-0.00940528
12	21	HMBS	2.46568	0.00704867
12	22	HMBS	2.53803	0.0520041
12	23	HMBS	2.67364	0.160217
12	24	HMBS	2.91037	0.369544
12	25	HMBS	3.27606	0.70784
12	26	HMBS	3.75744	1.16182
12	27	HMBS	4.2986	1.67558
12	28	HMBS	4.81328	2.16286
12	29	HMBS	5.28465	2.60684
12	30	HMBS	5.69978	2.99457
12	31	HMBS	6.02651	3.2939
12	32	HMBS	6.33643	3.57643
12	33	HMBS	6.6183	3.8309
12	34	HMBS	6.86475	4.04995
12	35	HMBS	7.08781	4.24561
12	36	HMBS	7.29699	4.42739
12	37	HMBS	7.41797	4.52098
12	38	HMBS	7.52679	4.6024
12	39	HMBS	7.6409	4.68912
12	40	HMBS	7.70512	4.72594
13	1	HMBS	1.39897	-0.0346289
13	2	HMBS	1.4289	-0.0278785
13	3	HMBS	1.46882	-0.0111488
13	4	HMBS	1.49802	-0.00512701
13	5	HMBS	1.52749	0.00115016
13	6	HMBS	1.55262	0.00309574
13	7	HMBS	1.57505	0.00234421
13	8	HMBS	1.60176	0.00586752
13	9	HMBS	1.62399	0.00491166
13	10	HMBS	1.64717	0.00490722
13	11	HMBS	1.67194	0.00649481
13	12	HMBS	1.68666	-0.00197266
13	13	HMBS	1.71181	-3.59487e-06
13	14	HMBS	1.73624	0.00123662
13	15	HMBS	1.75668	-0.0015032
13	16	HMBS	1.77656	-0.00480843
13	17	HMBS	1.79911	-0.00544421
13	18	HMBS	1.82178	-0.00595839
13	19	HMBS	1.86275	0.011822
13	20	HMBS	1.92189	0.0477775
13	21	HMBS	2.03758	0.140283
13	22	HMBS	2.2326	0.312113
13	23	HMBS	2.56616	0.62249
13	24	HMBS	3.05311	1.08626
13	25	HMBS	3.60265	1.61261
13	26	HMBS	4.18336	2.17014
13	27	HMBS	4.71562	2.67922
13	28	HMBS	5.16477	3.10518
13	29	HMBS	5.56076	3.47798
13	30	HMBS	5.91296	3.807
13	31	HMBS	6.21691	4.08776
13	32	HMBS	6.43838	4.28605
13	33	HMBS	6.64611	4.47059
13	34	HMBS	6.8548	4.6561
13	35	HMBS	6.99041	4.76852
13	36	HMBS	7.11026	4.86518
13	37	HMBS	7.27392	5.00567
13	38	HMBS	7.41053	5.11908
13	39	HMBS	7.48604	5.17141
13	40	HMBS	7.60584	5.26803
14	1	HMBS	2.85847	-0.110477
14	2	HMBS	2.92163	-0.0803048
14	3	HMBS	3.00957	-0.0253478
14	4	HMBS	3.05604	-0.0118587
14	5	HMBS	3.09124	-0.00964602
14	6	HMBS	3.12297	-0.0108928
14	7	HMBS	3.17539	0.00853745
14	8	HMBS	3.22222	0.0223844
14	9	HMBS	3.26124	0.0284216
14	10	HMBS	3.28952	0.0237184
14	11	HMBS	3.30365	0.00486508
14	12	HMBS	3.33199	0.000216753
14	13	HMBS	3.37972	0.0149612
14	14	HMBS	3.40673	0.00899246
14	15	HMBS	3.4149	-0.0158218
14	16	HMBS	3.44263	-0.0210831
14	17	HMBS	3.47925	-0.0174471
14	18	HMBS	3.5182	-0.0114789
14	19	HMBS	3.57565	0.012993
14	20	HMBS	3.64337	0.047729
14	21	HMBS	3.76813	0.139502
14	22	HMBS	3.9866	0.324985
14	23	HMBS	4.31352	0.618927
14	24	HMBS	4.71875	0.991164
14	25	HMBS	5.16423	1.40366
14	26	HMBS	5.58789	1.79434
14	27	HMBS	5.995	2.16846
14	28	HMBS	6.31983	2.46032
14	29	HMBS	6.65971	2.7672
14	30	HMBS	6.90738	2.98189
14	31	HMBS	7.13248	3.17401
14	32	HMBS	7.34444	3.35298
14	33	HMBS	7.56145	3.53701
14	34	HMBS	7.71915	3.66173
14	35	HMBS	7.86426	3.77386
14	36	HMBS	7.95	3.82661
14	37	HMBS	8.02815	3.87177
14	38	HMBS	8.15949	3.97013
14	39	HMBS	8.30434	4.082
14	40	HMBS	8.42491	4.16959
15	1	HMBS	1.97987	-0.0887508
15	2	HMBS	2.02398	-0.0779842
15	3	HMBS	2.10999	-0.0253249
15	4	HMBS	2.1542	-0.0144583
15	5	HMBS	2.19069	-0.0113142
15	6	HMBS	2.23519	-0.000157933
15	7	HMBS	2.27875	0.0100545
15	8	HMBS	2.31374	0.011696
15	9	HMBS	2.35587	0.0204781
15	10	HMBS	2.3905	0.0217587
15	11	HMBS	2.41598	0.0138982
15	12	HMBS	2.4498	0.0143717
15	13	HMBS	2.48159	0.0128165
15	14	HMBS	2.50051	-0.0016071
15	15	HMBS	2.52392	-0.0115463
15	16	HMBS	2.54828	-0.0205304
15	17	HMBS	2.58202	-0.0201346
15	18	HMBS	2.61327	-0.0222382
15	19	HMBS	2.66366	-0.00519032
15	20	HMBS	2.73537	0.0331734
15	21	HMBS	2.86797	0.132424
15	22	HMBS	3.06792	0.299029
15	23	HMBS	3.37126	0.56903
15	24	HMBS	3.80626	0.970682
15	25	HMBS	4.3152	1.44628
15	26	HMBS	4.8102	1.90793
15	27	HMBS	5.2607	2.32508
15	28	HMBS	5.65142	2.68246
15	29	HMBS	6.04714	3.04483
15	30	HMBS	6.36476	3.32911
15	31	HMBS	6.63359	3.56459
15	32	HMBS	6.87575	3.7734
15	33	HMBS	7.10896	3.97327
15	34	HMBS	7.25379	4.08475
15	35	HMBS	7.39063	4.18824
15	36	HMBS	7.54257	4.30684
15	37	HMBS	7.66266	4.39358
15	38	HMBS	7.7486	4.44618
15	39	HMBS	7.84798	4.51221
15	40	HMBS	7.97078	4.60166
16	1	HMBS	0.959029	-0.0696403
16	2	HMBS	0.993426	-0.0520885
16	3	HMBS	1.04627	-0.0160948
16	4	HMBS	1.07015	-0.00905101
16	5	HMBS	1.08959	-0.00645764
16	6	HMBS	1.1153	0.00240756
16	7	HMBS	1.1365	0.00675998
16	8	HMBS	1.16024	0.0136555
16	9	HMBS	1.1786	0.0151682
16	10	HMBS	1.18838	0.00809968
16	11	HMBS	1.20404	0.00691185
16	12	HMBS	1.21632	0.00235159
16	13	HMBS	1.23394	0.00312535
16	14	HMBS	1.24328	-0.00438106
16	15	HMBS	1.25486	-0.0096443
16	16	HMBS	1.27351	-0.00784236
16	17	HMBS	1.29319	-0.00500855
16	18	HMBS	1.31316	-0.00188684
16	19	HMBS	1.34353	0.0116446
16	20	HMBS	1.3811	0.0323712
16	21	HMBS	1.46359	0.098013
16	22	HMBS	1.60795	0.225523
16	23	HMBS	1.8551	0.455826
16	24	HMBS	2.28514	0.869028
16	25	HMBS	2.92117	1.4882
16	26	HMBS	3.68465	2.23484
16	27	HMBS	4.44998	2.98333
16	28	HMBS	5.13894	3.65544
16	29	HMBS	5.72996	4.22962
16	30	HMBS	6.22549	4.7083
16	31	HMBS	6.67574	5.14171
16	32	HMBS	6.99591	5.44503
16	33	HMBS	7.2973	5.72957
16	34	HMBS	7.53854	5.95397
16	35	HMBS	7.77674	6.17533
16	36	HMBS	8.01095	6.39269
16	37	HMBS	8.22756	6.59245
16	38	HMBS	8.34976	6.69781
16	39	HMBS	8.46378	6.79499
16	40	HMBS	8.57404	6.8884
17	1	HMBS	1.29524	-0.0450875
17	2	HMBS	1.32177	-0.0415586
17	3	HMBS	1.3673	-0.01904
17	4	HMBS	1.40729	-0.00204997
17	5	HMBS	1.43194	-0.000413469
17	6	HMBS	1.46318	0.00782568
17	7	HMBS	1.48921	0.0108457
17	8	HMBS	1.50789	0.00652165
17	9	HMBS	1.5261	0.00172872
17	10	HMBS	1.55005	0.00266749
17	11	HMBS	1.57082	0.000433388
17	12	HMBS	1.59157	-0.0018205
17	13	HMBS	1.62017	0.00377137
17	14	HMBS	1.64192	0.00251418
17	15	HMBS	1.66311	0.000698507
17	16	HMBS	1.68033	-0.00508779
17	17	HMBS	1.69983	-0.00859493
17	18	HMBS	1.73239	0.000955877
17	19	HMBS	1.76827	0.0138352
17	20	HMBS	1.82915	0.0517121
17	21	HMBS	1.94292	0.142471
17	22	HMBS	2.13251	0.309057
17	23	HMBS	2.44905	0.602593
17	24	HMBS	2.91803	1.04857
17	25	HMBS	3.46745	1.57497
17	26	HMBS	4.02992	2.11444
17	27	HMBS	4.55684	2.61835
17	28	HMBS	5.02672	3.06523
17	29	HMBS	5.43811	3.45361
17	30	HMBS	5.77431	3.76681
17	31	HMBS	6.06603	4.03552
17	32	HMBS	6.32977	4.27625
17	33	HMBS	6.53436	4.45784
17	34	HMBS	6.7153	4.61577
17	35	HMBS	6.87676	4.75423
17	36	HMBS	7.00359	4.85805
17	37	HMBS	7.14859	4.98004
17	38	HMBS	7.24127	5.04972
17	39	HMBS	7.36058	5.14602
17	40	HMBS	7.44328	5.20571
18	1	HMBS	1.36029	-0.0939142
18	2	HMBS	1.40703	-0.0783775
18	3	HMBS	1.4759	-0.040702
18	4	HMBS	1.51933	-0.0284712
18	5	HMBS	1.56975	-0.00925206
18	6	HMBS	1.62256	0.0123583
18	7	HMBS	1.66087	0.0194697
18	8	HMBS	1.69813	0.0255342
18	9	HMBS	1.72928	0.0254863
18	10	HMBS	1.75298	0.0179828
18	11	HMBS	1.78145	0.0152523
18	12	HMBS	1.81289	0.0154937
18	13	HMBS	1.83598	0.00738298
18	14	HMBS	1.85704	-0.00274904
18	15	HMBS	1.88663	-0.00435807
18	16	HMBS	1.9014	-0.0207902
18	17	HMBS	1.92075	-0.0326379
18	18	HMBS	1.95505	-0.0295323
18	19	HMBS	2.0012	-0.0145819
18	20	HMBS	2.06014	0.0131513
18	21	HMBS	2.18795	0.109767
18	22	HMBS	2.4021	0.292715
18	23	HMBS	2.75075	0.610171
18	24	HMBS	3.25019	1.07841
18	25	HMBS	3.82304	1.62006
18	26	HMBS	4.36397	2.12979
18	27	HMBS	4.86819	2.60281
18	28	HMBS	5.32515	3.02857
18	29	HMBS	5.75588	3.42811
18	30	HMBS	6.08101	3.72203
18	31	HMBS	6.37532	3.98515
18	32	HMBS	6.61003	4.18866
18	33	HMBS	6.83778	4.38521
18	34	HMBS	7.01883	4.53506
18	35	HMBS	7.16767	4.6527
18	36	HMBS	7.33063	4.78447
18	37	HMBS	7.43025	4.85288
18	38	HMBS	7.55622	4.94766
18	39	HMBS	7.61118	4.97142
18	40	HMBS	7.69503	5.02407
19	1	HMBS	0.761546	-0.0200778
19	2	HMBS	0.780622	-0.0136884
19	3	HMBS	0.804568	-0.00242799
19	4	HMBS	0.819068	-0.00061475
19	5	HMBS	0.831165	-0.00120376
19	6	HMBS	0.847182	0.00212641
19	7	HMBS	0.858174	0.000432037
19	8	HMBS	0.868105	-0.00232241
19	9	HMBS	0.884321	0.00120649
19	10	HMBS	0.897401	0.00160066
19	11	HMBS	0.9089	0.000413691
19	12	HMBS	0.92402	0.00284711
19	13	HMBS	0.93739	0.00353037
19	14	HMBS	0.948714	0.00216804
19	15	HMBS	0.957887	-0.00134475
19	16	HMBS	0.967176	-0.00474263
19	17	HMBS	0.981788	-0.00281674
19	18	HMBS	0.998439	0.00114822
19	19	HMBS	1.01574	0.00576741
19	20	HMBS	1.05414	0.0314723
19	21	HMBS	1.11837	0.0830204
19	22	HMBS	1.22937	0.181329
19	23	HMBS	1.43152	0.370798
19	24	HMBS	1.79134	0.71793
19	25	HMBS	2.33039	1.2443
19	26	HMBS	3.01326	1.91448
19	27	HMBS	3.69833	2.58686
19	28	HMBS	4.29925	3.1751
19	29	HMBS	4.81338	3.67654
19	30	HMBS	5.27355	4.12403
19	31	HMBS	5.66798	4.50577
19	32	HMBS	6.01364	4.83874
19	33	HMBS	6.27855	5.09096
19	34	HMBS	6.52487	5.3246
19	35	HMBS	6.7255	5.51254
19	36	HMBS	6.89677	5.67112
19	37	HMBS	7.04793	5.8096
19	38	HMBS	7.17453	5.92352
19	39	HMBS	7.29799	6.03429
19	40	HMBS	7.40763	6.13124
20	1	HMBS	1.08543	-0.0335071
20	2	HMBS	1.11073	-0.0258253
20	3	HMBS	1.14377	-0.010395
20	4	HMBS	1.16618	-0.0056045
20	5	HMBS	1.18587	-0.00352295
20	6	HMBS	1.20806	0.00104901
20	7	HMBS	1.22729	0.00265993
20	8	HMBS	1.2481	0.00585549
20	9	HMBS	1.26779	0.00793061
20	10	HMBS	1.28385	0.00637211
20	11	HMBS	1.30284	0.00775021
20	12	HMBS	1.31699	0.00427983
20	13	HMBS	1.33017	-0.000150777
20	14	HMBS	1.34799	5.12061e-05
20	15	HMBS	1.36715	0.00159191
20	16	HMBS	1.37431	-0.00885865
20	17	HMBS	1.39178	-0.00900845
20	18	HMBS	1.41637	-0.00203634
20	19	HMBS	1.44543	0.00941078
20	20	HMBS	1.48922	0.0355827
20	21	HMBS	1.57591	0.104665
20	22	HMBS	1.72015	0.231282
20	23	HMBS	1.964	0.457515
20	24	HMBS	2.3836	0.859499
20	25	HMBS	2.96868	1.42697
20	26	HMBS	3.64286	2.08353
20	27	HMBS	4.29238	2.71544
20	28	HMBS	4.87356	3.279
20	29	HMBS	5.37515	3.76298
20	30	HMBS	5.82543	4.19564
20	31	HMBS	6.19659	4.54918
20	32	HMBS	6.50401	4.83898
20	33	HMBS	6.75157	5.06893
20	34	HMBS	6.99307	5.29281
20	35	HMBS	7.20006	5.48219
20	36	HMBS	7.35112	5.61564
20	37	HMBS	7.48353	5.73043
20	38	HMBS	7.64463	5.87391
20	39	HMBS	7.75099	5.96266
20	40	HMBS	7.84081	6.03486
21	1	HMBS	1.94239	-0.0553519
21	2	HMBS	1.98272	-0.0578286
21	3	HMBS	2.04322	-0.0401432
21	4	HMBS	2.10253	-0.0236514
21	5	HMBS	2.15635	-0.012645
21	6	HMBS	2.20175	-0.0100561
21	7	HMBS	2.25609	0.00147205
21	8	HMBS	2.31042	0.012993
21	9	HMBS	2.36918	0.0289384
21	10	HMBS	2.40891	0.0258476
21	11	HMBS	2.44908	0.0232051
21	12	HMBS	2.50028	0.0315933
21	13	HMBS	2.54387	0.0323733
21	14	HMBS	2.57327	0.0189573
21	15	HMBS	2.60524	0.00812133
21	16	HMBS	2.62487	-0.0150707
21	17	HMBS	2.66376	-0.0189904
21	18	HMBS	2.70267	-0.0228915
21	19	HMBS	2.72832	-0.040053
21	20	HMBS	2.76584	-0.0453472
21	21	HMBS	2.8465	-0.00750413
21	22	HMBS	2.96416	0.0673416
21	23	HMBS	3.15052	0.210888
21	24	HMBS	3.45682	0.474377
21	25	HMBS	3.88879	0.863538
21	26	HMBS	4.38556	1.31749
21	27	HMBS	4.91039	1.79951
21	28	HMBS	5.3627	2.209
21	29	HMBS	5.76611	2.5696
21	30	HMBS	6.10423	2.86491
21	31	HMBS	6.44037	3.15824
21	32	HMBS	6.71908	3.39413
21	33	HMBS	6.98351	3.61575
21	34	HMBS	7.1719	3.76133
21	35	HMBS	7.32876	3.87537
21	36	HMBS	7.48017	3.98397
21	37	HMBS	7.59111	4.05209
21	38	HMBS	7.72326	4.14143
21	39	HMBS	7.84721	4.22257
21	40	HMBS	7.96737	4.29992
22	1	HMBS	1.8527	-0.0773062
22	2	HMBS	1.89422	-0.0617264
22	3	HMBS	1.94478	-0.0371071
22	4	HMBS	1.99052	-0.0173059
22	5	HMBS	2.04142	0.00765388
22	6	HMBS	2.07106	0.0113497
22	7	HMBS	2.096	0.0103492
22	8	HMBS	2.12414	0.012544
22	9	HMBS	2.15145	0.0139198
22	10	HMBS	2.17854	0.0150643
22	11	HMBS	2.19652	0.00710338
22	12	HMBS	2.22032	0.00496608
22	13	HMBS	2.24873	0.00743336
22	14	HMBS	2.27453	0.00728661
22	15	HMBS	2.29159	-0.00159484
22	16	HMBS	2.29785	-0.0212678
22	17	HMBS	2.32467	-0.0203946
22	18	HMBS	2.35989	-0.011109
22	19	HMBS	2.39263	-0.00431781
22	20	HMBS	2.43813	0.0152479
22	21	HMBS	2.53352	0.0846893
22	22	HMBS	2.69143	0.216659
22	23	HMBS	2.96127	0.460561
22	24	HMBS	3.34978	0.823133
22	25	HMBS	3.82773	1.27514
22	26	HMBS	4.3267	1.74817
22	27	HMBS	4.79041	2.18593
22	28	HMBS	5.19714	2.56673
22	29	HMBS	5.57252	2.91616
22	30	HMBS	5.90009	3.21779
22	31	HMBS	6.142	3.43376
22	32	HMBS	6.40903	3.67486
22	33	HMBS	6.61483	3.85471
22	34	HMBS	6.79902	4.01296
22	35	HMBS	6.96045	4.14845
22	36	HMBS	7.09861	4.26067
22	37	HMBS	7.19769	4.33381
22	38	HMBS	7.31362	4.42379
22	39	HMBS	7.42886	4.5131
22	40	HMBS	7.53616	4.59445
23	1	HMBS	1.46683	-0.0497398
23	2	HMBS	1.49789	-0.0389697
23	3	HMBS	1.54239	-0.01475
23	4	HMBS	1.56872	-0.00871079
23	5	HMBS	1.59656	-0.00116098
23	6	HMBS	1.62144	0.00342838
23	7	HMBS	1.64739	0.0090892
23	8	HMBS	1.66684	0.00825264
23	9	HMBS	1.68384	0.0049674
23	10	HMBS	1.70536	0.00619411
23	11	HMBS	1.72518	0.00572996
23	12	HMBS	1.7444	0.00465832
23	13	HMBS	1.76497	0.00494089
23	14	HMBS	1.78119	0.000873876
23	15	HMBS	1.79243	-0.00816989
23	16	HMBS	1.80723	-0.0136599
23	17	HMBS	1.83714	-0.0040442
23	18	HMBS	1.86383	0.00236097
23	19	HMBS	1.88463	0.00287326
23	20	HMBS	1.92398	0.0219319
23	21	HMBS	1.98894	0.0666085
23	22	HMBS	2.11123	0.168609
23	23	HMBS	2.32538	0.362464
23	24	HMBS	2.68055	0.697351
23	25	HMBS	3.16234	1.15886
23	26	HMBS	3.71112	1.68735
23	27	HMBS	4.25628	2.21222
23	28	HMBS	4.755	2.69065
23	29	HMBS	5.20472	3.12008
23	30	HMBS	5.59852	3.49359
23	31	HMBS	5.8878	3.76259
23	32	HMBS	6.15054	4.00503
23	33	HMBS	6.39239	4.2266
23	34	HMBS	6.62221	4.43613
23	35	HMBS	6.77485	4.56848
23	36	HMBS	6.88416	4.6575
23	37	HMBS	7.01348	4.76654
23	38	HMBS	7.15049	4.88325
23	39	HMBS	7.25899	4.97147
23	40	HMBS	7.33886	5.03105
24	1	HMBS	0.844428	-0.0417248
24	2	HMBS	0.870205	-0.0345505
24	3	HMBS	0.908663	-0.0146961
24	4	HMBS	0.934182	-0.00778008
24	5	HMBS	0.958649	-0.00191534
24	6	HMBS	0.979747	0.000579345
24	7	HMBS	1.00553	0.00775985
24	8	HMBS	1.02679	0.010418
24	9	HMBS	1.04445	0.00947277
24	10	HMBS	1.0586	0.00501773
24	11	HMBS	1.07448	0.00229243
24	12	HMBS	1.10051	0.00972268
24	13	HMBS	1.11078	0.00138917
24	14	HMBS	1.12664	-0.0013558
24	15	HMBS	1.14007	-0.00652335
24	16	HMBS	1.15562	-0.00957958
24	17	HMBS	1.179	-0.00480174
24	18	HMBS	1.20165	-0.000749397
24	19	HMBS	1.23318	0.0121756
24	20	HMBS	1.27611	0.0365037
24	21	HMBS	1.35701	0.0987924
24	22	HMBS	1.49276	0.215946
24	23	HMBS	1.72802	0.432604
24	24	HMBS	2.11548	0.801459
24	25	HMBS	2.63724	1.30462
24	26	HMBS	3.20557	1.85434
24	27	HMBS	3.73815	2.36832
24	28	HMBS	4.22258	2.83415
24	29	HMBS	4.6532	3.24616
24	30	HMBS	5.03637	3.61073
24	31	HMBS	5.3396	3.89535
24	32	HMBS	5.62966	4.16681
24	33	HMBS	5.85488	4.37343
24	34	HMBS	6.04463	4.54458
24	35	HMBS	6.17937	4.66072
24	36	HMBS	6.30052	4.76327
24	37	HMBS	6.44312	4.88725
24	38	HMBS	6.55871	4.98424
24	39	HMBS	6.68284	5.08977
24	40	HMBS	6.79683	5.18516
25	1	HMBS	1.80496	-0.0537475
25	2	HMBS	1.84395	-0.0378005
25	3	HMBS	1.89802	-0.00677184
25	4	HMBS	1.93393	0.00609356
25	5	HMBS	1.95353	0.00265328
25	6	HMBS	1.97304	-0.000878429
25	7	HMBS	1.99795	0.000989324
25	8	HMBS	2.01883	-0.00117387
25	9	HMBS	2.04762	0.00457343
25	10	HMBS	2.07813	0.012045
25	11	HMBS	2.09424	0.00511437
25	12	HMBS	2.09903	-0.0131373
25	13	HMBS	2.11605	-0.0191629
25	14	HMBS	2.14492	-0.0133381
25	15	HMBS	2.18778	0.00647948
25	16	HMBS	2.21623	0.0118892
25	17	HMBS	2.232	0.00462479
25	18	HMBS	2.26263	0.0122086
25	19	HMBS	2.31466	0.0411998
25	20	HMBS	2.40947	0.112965
25	21	HMBS	2.56584	0.246296
25	22	HMBS	2.83426	0.491671
25	23	HMBS	3.28022	0.914591
25	24	HMBS	3.8852	1.49652
25	25	HMBS	4.57946	2.16774
25	26	HMBS	5.2388	2.80405
25	27	HMBS	5.8261	3.3683
25	28	HMBS	6.35658	3.87573
25	29	HMBS	6.82684	4.32295
25	30	HMBS	7.18727	4.66035
25	31	HMBS	7.49498	4.94501
25	32	HMBS	7.72923	5.15622
25	33	HMBS	7.94685	5.3508
25	34	HMBS	8.13338	5.51428
25	35	HMBS	8.29693	5.65479
25	36	HMBS	8.4358	5.77063
25	37	HMBS	8.58196	5.89374
25	38	HMBS	8.73915	6.02789
25	39	HMBS	8.83645	6.10214
25	40	HMBS	8.91421	6.15687
26	1	HMBS	2.46426	-0.115147
26	2	HMBS	2.54143	-0.0736879
26	3	HMBS	2.63604	-0.0147972
26	4	HMBS	2.68589	-0.000668879
26	5	HMBS	2.71603	-0.00624585
26	6	HMBS	2.75246	-0.00553071
26	7	HMBS	2.80174	0.00803542
26	8	HMBS	2.8359	0.00646818
26	9	HMBS	2.87559	0.0104487
26	10	HMBS	2.9188	0.0179363
26	11	HMBS	2.94463	0.00805283
26	12	HMBS	2.96753	-0.00477254
26	13	HMBS	2.9972	-0.0108199
26	14	HMBS	3.03753	-0.00620735
26	15	HMBS	3.08861	0.00915551
26	16	HMBS	3.1255	0.0103298
26	17	HMBS	3.14224	-0.0086453
26	18	HMBS	3.17387	-0.0127391
26	19	HMBS	3.21681	-0.00551129
26	20	HMBS	3.29884	0.0408009
26	21	HMBS	3.42896	0.1352
26	22	HMBS	3.63891	0.309433
26	23	HMBS	3.94726	0.582064
26	24	HMBS	4.32972	0.928805
26	25	HMBS	4.7137	1.27707
26	26	HMBS	5.06673	1.59438
26	27	HMBS	5.43972	1.93165
26	28	HMBS	5.7564	2.21262
26	29	HMBS	6.00133	2.42183
26	30	HMBS	6.23016	2.61494
26	31	HMBS	6.436	2.78506
26	32	HMBS	6.58591	2.89926
26	33	HMBS	6.72536	3.00299
26	34	HMBS	6.85594	3.09785
26	35	HMBS	6.99341	3.1996
26	36	HMBS	7.10598	3.27646
26	37	HMBS	7.24804	3.3828
26	38	HMBS	7.3258	3.42484
26	39	HMBS	7.36125	3.42457
26	40	HMBS	7.38259	3.41019
27	1	HMBS	1.32406	-0.0216293
27	2	HMBS	1.35148	-0.0142085
27	3	HMBS	1.38669	0.00100329
27	4	HMBS	1.40787	0.00219532
27	5	HMBS	1.4238	-0.00186752
27	6	HMBS	1.44166	-0.0040093
27	7	HMBS	1.4652	-0.000459193
27	8	HMBS	1.48443	-0.00122494
27	9	HMBS	1.50673	0.00108265
27	10	HMBS	1.52673	0.00108627
27	11	HMBS	1.55123	0.00559578
27	12	HMBS	1.56554	-9.48657e-05
27	13	HMBS	1.58573	0.00010069
27	14	HMBS	1.60221	-0.00340818
27	15	HMBS	1.62778	0.00216157
27	16	HMBS	1.65496	0.00935208
27	17	HMBS	1.68244	0.0168355
27	18	HMBS	1.71796	0.0323613
27	19	HMBS	1.77184	0.0662476
27	20	HMBS	1.86376	0.138173
27	21	HMBS	2.01897	0.273389
27	22	HMBS	2.27442	0.508846
27	23	HMBS	2.67645	0.890879
27	24	HMBS	3.23978	1.43421
27	25	HMBS	3.86131	2.03575
27	26	HMBS	4.46528	2.61973
27	27	HMBS	5.01938	3.15383
27	28	HMBS	5.52397	3.63843
27	29	HMBS	5.93356	4.02803
27	30	HMBS	6.25935	4.33382
27	31	HMBS	6.55048	4.60495
27	32	HMBS	6.78582	4.8203
27	33	HMBS	7.00765	5.02214
27	34	HMBS	7.15802	5.1525
27	35	HMBS	7.29948	5.27397
27	36	HMBS	7.44685	5.40135
27	37	HMBS	7.59711	5.53162
27	38	HMBS	7.69788	5.61239
27	39	HMBS	7.79221	5.68673
27	40	HMBS	7.86577	5.74029
28	1	HMBS	1.66769	-0.0669285
28	2	HMBS	1.69859	-0.062674
28	3	HMBS	1.76277	-0.0251416
28	4	HMBS	1.81174	-0.00281348
28	5	HMBS	1.83831	-0.00289054
28	6	HMBS	1.87462	0.00677883
28	7	HMBS	1.91171	0.017227
28	8	HMBS	1.93618	0.0150511
28	9	HMBS	1.95419	0.00641712
28	10	HMBS	1.97522	0.000802437
28	11	HMBS	2.00452	0.0034604
28	12	HMBS	2.02765	-4.90532e-05
28	13	HMBS	2.05264	-0.00171028
28	14	HMBS	2.07661	-0.00438122
28	15	HMBS	2.10105	-0.00658747
28	16	HMBS	2.13091	-0.00336517
28	17	HMBS	2.15812	-0.00279814
28	18	HMBS	2.19192	0.00435591
28	19	HMBS	2.27291	0.0586975
28	20	HMBS	2.39916	0.158311
28	21	HMBS	2.60685	0.339357
28	22	HMBS	2.96141	0.667266
28	23	HMBS	3.49009	1.16931
28	24	HMBS	4.09329	1.74586
28	25	HMBS	4.67666	2.30259
28	26	HMBS	5.22196	2.82125
28	27	HMBS	5.70331	3.27596
28	28	HMBS	6.13482	3.68082
28	29	HMBS	6.49786	4.01722
28	30	HMBS	6.77299	4.26571
28	31	HMBS	7.01329	4.47936
28	32	HMBS	7.21301	4.65244
28	33	HMBS	7.391	4.80378
28	34	HMBS	7.55918	4.94531
28	35	HMBS	7.71929	5.07878
28	36	HMBS	7.89479	5.22764
28	37	HMBS	8.00204	5.30825
28	38	HMBS	8.07615	5.35571
28	39	HMBS	8.13515	5.38807
28	40	HMBS	8.22729	5.45356
29	1	HMBS	2.57487	-0.0766794
29	2	HMBS	2.63955	-0.0454532
29	3	HMBS	2.70449	-0.0139788
29	4	HMBS	2.74033	-0.0116019
29	5	HMBS	2.78296	-0.00243272
29	6	HMBS	2.83846	0.0196084
29	7	HMBS	2.85572	0.00341297
29	8	HMBS	2.87991	-0.00586359
29	9	HMBS	2.92261	0.00337425
29	10	HMBS	2.96283	0.0101378
29	11	HMBS	3.00007	0.0139201
29	12	HMBS	3.02533	0.00571478
29	13	HMBS	3.05042	-0.00265411
29	14	HMBS	3.07771	-0.00882431
29	15	HMBS	3.1215	0.00149881
29	16	HMBS	3.15617	0.00270862
29	17	HMBS	3.1719	-0.0150204
29	18	HMBS	3.21146	-0.00891558
29	19	HMBS	3.26783	0.0139929
29	20	HMBS	3.36848	0.0811756
29	21	HMBS	3.51663	0.195871
29	22	HMBS	3.76081	0.406583
29	23	HMBS	4.18301	0.795326
29	24	HMBS	4.76182	1.34068
29	25	HMBS	5.46258	2.00797
29	26	HMBS	6.12573	2.63766
29	27	HMBS	6.74687	3.22535
29	28	HMBS	7.29298	3.73799
29	29	HMBS	7.78979	4.20134
29	30	HMBS	8.18749	4.56558
29	31	HMBS	8.54472	4.88935
29	32	HMBS	8.86101	5.17218
29	33	HMBS	9.14182	5.41953
29	34	HMBS	9.34783	5.59208
29	35	HMBS	9.54842	5.7592
29	36	HMBS	9.70309	5.88041
29	37	HMBS	9.83414	5.978
29	38	HMBS	9.98973	6.10013
29	39	HMBS	10.1206	6.19757
29	40	HMBS	10.2239	6.26736
30	1	HMBS	2.74673	-0.169502
30	2	HMBS	2.8106	-0.141145
30	3	HMBS	2.93844	-0.0488306
30	4	HMBS	3.0121	-0.0106882
30	5	HMBS	3.06214	0.00382856
30	6	HMBS	3.10371	0.00987456
30	7	HMBS	3.15098	0.0216245
30	8	HMBS	3.19156	0.0266837
30	9	HMBS	3.22152	0.0211258
30	10	HMBS	3.24973	0.0138056
30	11	HMBS	3.28271	0.0112638
30	12	HMBS	3.30854	0.0015787
30	13	HMBS	3.33563	-0.00685589
30	14	HMBS	3.36274	-0.0152633
30	15	HMBS	3.38538	-0.0281472
30	16	HMBS	3.42233	-0.0267142
30	17	HMBS	3.47546	-0.00910773
30	18	HMBS	3.52745	0.00735717
30	19	HMBS	3.57981	0.0241945
30	20	HMBS	3.68024	0.0891024
30	21	HMBS	3.85542	0.228763
30	22	HMBS	4.1561	0.493927
30	23	HMBS	4.61219	0.914496
30	24	HMBS	5.1823	1.44908
30	25	HMBS	5.78783	2.01909
30	26	HMBS	6.37479	2.57052
30	27	HMBS	6.90403	3.06425
30	28	HMBS	7.3272	3.4519
30	29	HMBS	7.70846	3.79763
30	30	HMBS	8.05941	4.11306
30	31	HMBS	8.35981	4.37795
30	32	HMBS	8.61163	4.59424
30	33	HMBS	8.83094	4.77803
30	34	HMBS	9.0315	4.94307
30	35	HMBS	9.18667	5.06272
30	36	HMBS	9.31674	5.15727
30	37	HMBS	9.49731	5.30232
30	38	HMBS	9.62284	5.39232
30	39	HMBS	9.75061	5.48457
30	40	HMBS	9.86796	5.5664
31	1	HMBS	1.27081	-0.0337675
31	2	HMBS	1.29313	-0.0319437
31	3	HMBS	1.32591	-0.0196558
31	4	HMBS	1.35463	-0.0114364
31	5	HMBS	1.38555	-0.00100302
31	6	HMBS	1.41482	0.00777023
31	7	HMBS	1.43145	0.00390111
31	8	HMBS	1.45333	0.00528804
31	9	HMBS	1.47679	0.00825187
31	10	HMBS	1.50239	0.0133623
31	11	HMBS	1.52974	0.0202187
31	12	HMBS	1.53466	0.00463794
31	13	HMBS	1.55067	0.000157628
31	14	HMBS	1.56649	-0.00451342
31	15	HMBS	1.58266	-0.00884472
31	16	HMBS	1.60236	-0.00963909
31	17	HMBS	1.62399	-0.00849534
31	18	HMBS	1.65397	0.000989353
31	19	HMBS	1.68029	0.00681146
31	20	HMBS	1.73217	0.0381935
31	21	HMBS	1.81744	0.102972
31	22	HMBS	1.97791	0.242949
31	23	HMBS	2.25481	0.499354
31	24	HMBS	2.71742	0.941474
31	25	HMBS	3.37328	1.57684
31	26	HMBS	4.15899	2.34205
31	27	HMBS	4.94444	3.10701
31	28	HMBS	5.65654	3.79861
31	29	HMBS	6.26268	4.38426
31	30	HMBS	6.79294	4.89403
31	31	HMBS	7.20975	5.29034
31	32	HMBS	7.52	5.58009
31	33	HMBS	7.84495	5.88455
31	34	HMBS	8.1121	6.13121
31	35	HMBS	8.32293	6.32154
31	36	HMBS	8.53551	6.51363
31	37	HMBS	8.7242	6.68182
31	38	HMBS	8.88976	6.82689
31	39	HMBS	9.02211	6.93875
31	40	HMBS	9.04982	6.94595
32	1	HMBS	1.43986	-0.0426535
32	2	HMBS	1.47263	-0.0309549
32	3	HMBS	1.51232	-0.0123423
32	4	HMBS	1.53355	-0.0121973
32	5	HMBS	1.56015	-0.00667451
32	6	HMBS	1.59104	0.00313533
32	7	HMBS	1.61676	0.0077828
32	8	HMBS	1.63682	0.00676199
32	9	HMBS	1.66207	0.0109313
32	10	HMBS	1.68406	0.0118475
32	11	HMBS	1.69349	0.000196247
32	12	HMBS	1.72202	0.00764502
32	13	HMBS	1.74498	0.00952648
32	14	HMBS	1.7625	0.00597593
32	15	HMBS	1.77052	-0.0070899
32	16	HMBS	1.78532	-0.0133632
32	17	HMBS	1.80763	-0.0121355
32	18	HMBS	1.84149	0.000645297
32	19	HMBS	1.88174	0.0198157
32	20	HMBS	1.94599	0.0629924
32	21	HMBS	2.05754	0.153463
32	22	HMBS	2.25792	0.332759
32	23	HMBS	2.60774	0.661511
32	24	HMBS	3.12635	1.15904
32	25	HMBS	3.70508	1.71669
32	26	HMBS	4.25506	2.24559
32	27	HMBS	4.76137	2.73083
32	28	HMBS	5.2152	3.16357
32	29	HMBS	5.59409	3.52138
32	30	HMBS	5.93235	3.83857
32	31	HMBS	6.20736	4.0925
32	32	HMBS	6.43778	4.30184
32	33	HMBS	6.63935	4.48233
32	34	HMBS	6.81904	4.64094
32	35	HMBS	6.96443	4.76525
32	36	HMBS	7.08093	4.86067
32	37	HMBS	7.21613	4.97479
32	38	HMBS	7.30461	5.0422
32	39	HMBS	7.43099	5.1475
32	40	HMBS	7.48533	5.18076
33	1	HMBS	1.61788	-0.0598601
33	2	HMBS	1.65609	-0.0489853
33	3	HMBS	1.71111	-0.0212944
33	4	HMBS	1.74025	-0.0194896
33	5	HMBS	1.77351	-0.01357
33	6	HMBS	1.81861	0.00419795
33	7	HMBS	1.86187	0.0201272
33	8	HMBS	1.88779	0.0187092
33	9	HMBS	1.91018	0.0137593
33	10	HMBS	1.93253	0.00878141
33	11	HMBS	1.9644	0.0133092
33	12	HMBS	1.98995	0.0115263
33	13	HMBS	2.00588	0.000123402
33	14	HMBS	2.03179	-0.00130157
33	15	HMBS	2.05929	-0.00113844
33	16	HMBS	2.08291	-0.00484794
33	17	HMBS	2.0862	-0.0288919
33	18	HMBS	2.11711	-0.0253161
33	19	HMBS	2.16037	-0.00939561
33	20	HMBS	2.24446	0.0473576
33	21	HMBS	2.377	0.152569
33	22	HMBS	2.60266	0.350889
33	23	HMBS	2.96967	0.690569
33	24	HMBS	3.47041	1.16397
33	25	HMBS	4.05755	1.72378
33	26	HMBS	4.61007	2.24897
33	27	HMBS	5.13034	2.7419
33	28	HMBS	5.57969	3.16392
33	29	HMBS	5.9236	3.48049
33	30	HMBS	6.27768	3.80724
33	31	HMBS	6.54542	4.04764
33	32	HMBS	6.7308	4.20569
33	33	HMBS	6.93805	4.3856
33	34	HMBS	7.09995	4.52016
33	35	HMBS	7.30432	4.6972
33	36	HMBS	7.45376	4.8193
33	37	HMBS	7.58057	4.91879
33	38	HMBS	7.69884	5.00972
33	39	HMBS	7.76255	5.04609
33	40	HMBS	7.83659	5.0928
34	1	HMBS	0.774716	-0.0151869
34	2	HMBS	0.785543	-0.0151076
34	3	HMBS	0.80783	-0.00356802
34	4	HMBS	0.822849	0.000704206
34	5	HMBS	0.83398	0.00108836
34	6	HMBS	0.84452	0.000880645
34	7	HMBS	0.853109	-0.0012774
34	8	HMBS	0.859407	-0.0057261
34	9	HMBS	0.879043	0.00316191
34	10	HMBS	0.891102	0.00447435
34	11	HMBS	0.898106	0.000730642
34	12	HMBS	0.9099	0.00177778
34	13	HMBS	0.922209	0.00333984
34	14	HMBS	0.930309	0.000692747
34	15	HMBS	0.938656	-0.00170753
34	16	HMBS	0.951559	0.000448079
34	17	HMBS	0.956839	-0.00501951
34	18	HMBS	0.969403	-0.00320246
34	19	HMBS	0.992565	0.00921206
34	20	HMBS	1.02319	0.029089
34	21	HMBS	1.07964	0.0747899
34	22	HMBS	1.1808	0.16521
34	23	HMBS	1.36269	0.336349
34	24	HMBS	1.67747	0.640379
34	25	HMBS	2.19314	1.1453
34	26	HMBS	2.86929	1.81071
34	27	HMBS	3.60503	2.5357
34	28	HMBS	4.26404	3.18396
34	29	HMBS	4.84677	3.75594
34	30	HMBS	5.33433	4.23276
34	31	HMBS	5.73563	4.62331
34	32	HMBS	6.06966	4.9466
34	33	HMBS	6.36164	5.22782
34	34	HMBS	6.55882	5.41426
34	35	HMBS	6.77527	5.61996
34	36	HMBS	6.97911	5.81306
34	37	HMBS	7.14679	5.96999
34	38	HMBS	7.24143	6.05388
34	39	HMBS	7.38506	6.18676
34	40	HMBS	7.50318	6.29414
35	1	HMBS	1.06898	-0.0275312
35	2	HMBS	1.0894	-0.0201132
35	3	HMBS	1.11437	-0.00814303
35	4	HMBS	1.13103	-0.00449145
35	5	HMBS	1.14564	-0.002883
35	6	HMBS	1.16405	0.00252156
35	7	HMBS	1.18359	0.009053
35	8	HMBS	1.19229	0.00474975
35	9	HMBS	1.2026	0.00205666
35	10	HMBS	1.21674	0.00319149
35	11	HMBS	1.22882	0.00226735
35	12	HMBS	1.24077	0.00121648
35	13	HMBS	1.25286	0.000297345
35	14	HMBS	1.2616	-0.00396061
35	15	HMBS	1.27807	-0.000501189
35	16	HMBS	1.29076	-0.000813076
35	17	HMBS	1.30002	-0.00456129
35	18	HMBS	1.31766	7.4843e-05
35	19	HMBS	1.33777	0.00717789
35	20	HMBS	1.38195	0.0383606
35	21	HMBS	1.46324	0.106641
35	22	HMBS	1.60282	0.233218
35	23	HMBS	1.85039	0.467786
35	24	HMBS	2.26005	0.864442
35	25	HMBS	2.83538	1.42677
35	26	HMBS	3.52165	2.10004
35	27	HMBS	4.17963	2.74501
35	28	HMBS	4.77018	3.32256
35	29	HMBS	5.26572	3.80509
35	30	HMBS	5.66748	4.19384
35	31	HMBS	6.02856	4.54192
35	32	HMBS	6.29208	4.79244
35	33	HMBS	6.52112	5.00847
35	34	HMBS	6.755	5.22935
35	35	HMBS	6.97315	5.43449
35	36	HMBS	7.13523	5.58357
35	37	HMBS	7.26215	5.69748
35	38	HMBS	7.41057	5.8329
35	39	HMBS	7.48736	5.89669
35	40	HMBS	7.50278	5.8991
36	1	HMBS	1.74659	-0.0887143
36	2	HMBS	1.78892	-0.0703186
36	3	HMBS	1.84072	-0.0424545
36	4	HMBS	1.8866	-0.0205159
36	5	HMBS	1.91593	-0.0151288
36	6	HMBS	1.95285	-0.0021464
36	7	HMBS	1.99672	0.0177864
36	8	HMBS	2.02431	0.0214322
36	9	HMBS	2.04601	0.0191933
36	10	HMBS	2.06918	0.0184259
36	11	HMBS	2.09752	0.0228266
36	12	HMBS	2.1177	0.0190699
36	13	HMBS	2.14186	0.0192893
36	14	HMBS	2.16012	0.0136129
36	15	HMBS	2.17283	0.00238625
36	16	HMBS	2.1831	-0.0112801
36	17	HMBS	2.20099	-0.0173282
36	18	HMBS	2.22107	-0.0211891
36	19	HMBS	2.24222	-0.0239796
36	20	HMBS	2.27771	-0.0124341
36	21	HMBS	2.32365	0.00956843
36	22	HMBS	2.39669	0.0586739
36	23	HMBS	2.51906	0.157108
36	24	HMBS	2.73377	0.347878
36	25	HMBS	3.08019	0.670358
36	26	HMBS	3.56466	1.13089
36	27	HMBS	4.10046	1.64275
36	28	HMBS	4.59461	2.11296
36	29	HMBS	5.04536	2.53977
36	30	HMBS	5.45832	2.9288
36	31	HMBS	5.81965	3.26618
36	32	HMBS	6.09917	3.52176
36	33	HMBS	6.33654	3.7352
36	34	HMBS	6.53059	3.9053
36	35	HMBS	6.73618	4.08696
36	36	HMBS	6.89859	4.22543
36	37	HMBS	6.99754	4.30044
36	38	HMBS	7.1244	4.40336
36	39	HMBS	7.24965	4.50467
36	40	HMBS	7.35252	4.58361
37	1	HMBS	1.12586	-0.0413777
37	2	HMBS	1.15167	-0.0407713
37	3	HMBS	1.1994	-0.0182506
37	4	HMBS	1.23591	-0.00694347
37	5	HMBS	1.26693	-0.0011321
37	6	HMBS	1.28798	-0.00528912
37	7	HMBS	1.31286	-0.00561679
37	8	HMBS	1.35254	0.00885669
37	9	HMBS	1.38217	0.0132732
37	10	HMBS	1.41319	0.0190835
37	11	HMBS	1.43372	0.0144089
37	12	HMBS	1.45479	0.0102678
37	13	HMBS	1.47993	0.0102063
37	14	HMBS	1.49424	-0.000698893
37	15	HMBS	1.51858	-0.00156169
37	16	HMBS	1.52618	-0.0191702
37	17	HMBS	1.55312	-0.0174335
37	18	HMBS	1.58539	-0.0103789
37	19	HMBS	1.61594	-0.00503434
37	20	HMBS	1.67606	0.0298746
37	21	HMBS	1.77786	0.106476
37	22	HMBS	1.95489	0.258291
37	23	HMBS	2.26667	0.544868
37	24	HMBS	2.75218	1.00517
37	25	HMBS	3.39048	1.61826
37	26	HMBS	4.0381	2.24067
37	27	HMBS	4.61775	2.79512
37	28	HMBS	5.16512	3.31728
37	29	HMBS	5.61719	3.74414
37	30	HMBS	5.98684	4.08859
37	31	HMBS	6.33154	4.40808
37	32	HMBS	6.61317	4.6645
37	33	HMBS	6.83453	4.86065
37	34	HMBS	7.03969	5.0406
37	35	HMBS	7.21491	5.19061
37	36	HMBS	7.33224	5.28274
37	37	HMBS	7.4524	5.37769
37	38	HMBS	7.60443	5.50451
37	39	HMBS	7.71101	5.58588
37	40	HMBS	7.8722	5.72186
38	1	HMBS	2.5534	-0.10955
38	2	HMBS	2.61529	-0.0781171
38	3	HMBS	2.69288	-0.0309818
38	4	HMBS	2.73444	-0.0198827
38	5	HMBS	2.77446	-0.0103219
38	6	HMBS	2.83503	0.0197958
38	7	HMBS	2.85332	0.00763409
38	8	HMBS	2.88673	0.0105886
38	9	HMBS	2.92663	0.0200278
38	10	HMBS	2.9631	0.0260476
38	11	HMBS	2.97524	0.00772484
38	12	HMBS	2.998	3.67733e-05
38	13	HMBS	3.03065	0.00222353
38	14	HMBS	3.06591	0.00702931
38	15	HMBS	3.08787	-0.00146008
38	16	HMBS	3.11177	-0.00801614
38	17	HMBS	3.13836	-0.0118893
38	18	HMBS	3.16214	-0.0185564
38	19	HMBS	3.20168	-0.00948009
38	20	HMBS	3.27786	0.0362493
38	21	HMBS	3.41624	0.144172
38	22	HMBS	3.62529	0.322771
38	23	HMBS	3.92629	0.593308
38	24	HMBS	4.3179	0.95447
38	25	HMBS	4.74778	1.35389
38	26	HMBS	5.15695	1.7326
38	27	HMBS	5.55098	2.09618
38	28	HMBS	5.87984	2.39459
38	29	HMBS	6.17979	2.66408
38	30	HMBS	6.45067	2.9045
38	31	HMBS	6.64353	3.0669
38	32	HMBS	6.86472	3.25765
38	33	HMBS	7.04368	3.40614
38	34	HMBS	7.18363	3.51564
38	35	HMBS	7.30029	3.60185
38	36	HMBS	7.44593	3.71703
38	37	HMBS	7.5475	3.78814
38	38	HMBS	7.67717	3.88736
38	39	HMBS	7.76244	3.94218
38	40	HMBS	7.84444	3.99371
39	1	HMBS	1.47742	-0.0358107
39	2	HMBS	1.51033	-0.0253997
39	3	HMBS	1.54968	-0.00854794
39	4	HMBS	1.57492	-0.00580691
39	5	HMBS	1.59764	-0.0055831
39	6	HMBS	1.62097	-0.00475501
39	7	HMBS	1.64929	0.00106985
39	8	HMBS	1.67757	0.00685465
39	9	HMBS	1.7023	0.00908285
39	10	HMBS	1.72237	0.00665056
39	11	HMBS	1.74716	0.00894909
39	12	HMBS	1.7687	0.00798581
39	13	HMBS	1.78833	0.00511936
39	14	HMBS	1.81425	0.00854216
39	15	HMBS	1.82613	-0.00207671
39	16	HMBS	1.83799	-0.0127179
39	17	HMBS	1.85844	-0.0147668
39	18	HMBS	1.8878	-0.00790278
39	19	HMBS	1.93482	0.0166181
39	20	HMBS	1.99143	0.0507266
39	21	HMBS	2.07941	0.116213
39	22	HMBS	2.23889	0.253189
39	23	HMBS	2.52087	0.512673
39	24	HMBS	2.97891	0.948212
39	25	HMBS	3.54115	1.48796
39	26	HMBS	4.12788	2.05219
39	27	HMBS	4.68929	2.5911
39	28	HMBS	5.17176	3.05107
39	29	HMBS	5.59373	3.45054
39	30	HMBS	5.92196	3.75627
39	31	HMBS	6.23646	4.04827
39	32	HMBS	6.48757	4.27689
39	33	HMBS	6.71243	4.47925
39	34	HMBS	6.89881	4.64313
39	35	HMBS	7.07601	4.79783
39	36	HMBS	7.21581	4.91513
39	37	HMBS	7.36997	5.04679
39	38	HMBS	7.51018	5.16451
39	39	HMBS	7.61307	5.2449
39	40	HMBS	7.66584	5.27517
40	1	HMBS	0.887595	-0.0561607
40	2	HMBS	0.909402	-0.0513305
40	3	HMBS	0.953374	-0.0243354
40	4	HMBS	0.987223	-0.00746285
40	5	HMBS	1.01397	0.0023096
40	6	HMBS	1.03022	0.00157883
40	7	HMBS	1.05158	0.00596618
40	8	HMBS	1.07392	0.0113263
40	9	HMBS	1.09114	0.0115669
40	10	HMBS	1.10567	0.00912611
40	11	HMBS	1.11962	0.00609519
40	12	HMBS	1.13684	0.00634038
40	13	HMBS	1.15382	0.0063394
40	14	HMBS	1.16586	0.00140865
40	15	HMBS	1.17508	-0.00635572
40	16	HMBS	1.18788	-0.0105313
40	17	HMBS	1.20201	-0.0133723
40	18	HMBS	1.22067	-0.0116896
40	19	HMBS	1.25145	0.00211174
40	20	HMBS	1.28919	0.0228689
40	21	HMBS	1.35734	0.0740468
40	22	HMBS	1.47868	0.178407
40	23	HMBS	1.68879	0.371542
40	24	HMBS	2.06882	0.734591
40	25	HMBS	2.64605	1.29484
40	26	HMBS	3.35041	1.98223
40	27	HMBS	4.04184	2.65668
40	28	HMBS	4.67741	3.27528
40	29	HMBS	5.25813	3.83902
40	30	HMBS	5.75528	4.3192
40	31	HMBS	6.17027	4.71721
40	32	HMBS	6.50553	5.03549
40	33	HMBS	6.80878	5.32177
40	34	HMBS	7.04881	5.54482
40	35	HMBS	7.26449	5.74351
40	36	HMBS	7.43561	5.89766
40	37	HMBS	7.60172	6.0468
40	38	HMBS	7.69096	6.11906
40	39	HMBS	7.81808	6.2292
40	40	HMBS	7.96572	6.35986
41	1	HMBS	1.42797	-0.0228539
41	2	HMBS	1.45889	-0.0119733
41	3	HMBS	1.49296	0.00205459
41	4	HMBS	1.49949	-0.0114525
41	5	HMBS	1.52106	-0.00992072
41	6	HMBS	1.55033	-0.000687675
41	7	HMBS	1.58283	0.0117827
41	8	HMBS	1.59954	0.00845196
41	9	HMBS	1.61092	-0.000201156
41	10	HMBS	1.63722	0.00605333
41	11	HMBS	1.65667	0.0054683
41	12	HMBS	1.67178	0.00054071
41	13	HMBS	1.68915	-0.00212452
41	14	HMBS	1.71178	0.000470116
41	15	HMBS	1.72543	-0.00591826
41	16	HMBS	1.74687	-0.00451691
41	17	HMBS	1.76459	-0.0068263
41	18	HMBS	1.79962	0.00816265
41	19	HMBS	1.83003	0.0185306
41	20	HMBS	1.88953	0.0579945
41	21	HMBS	2.00726	0.155688
41	22	HMBS	2.1973	0.32569
41	23	HMBS	2.51457	0.622931
41	24	HMBS	2.98386	1.07218
41	25	HMBS	3.53381	1.6021
41	26	HMBS	4.08481	2.13306
41	27	HMBS	4.61048	2.63869
41	28	HMBS	5.08392	3.09209
41	29	HMBS	5.48718	3.47532
41	30	HMBS	5.82343	3.79153
41	31	HMBS	6.09755	4.04562
41	32	HMBS	6.32177	4.24979
41	33	HMBS	6.51026	4.41825
41	34	HMBS	6.68582	4.57377
41	35	HMBS	6.85106	4.71897
41	36	HMBS	6.95835	4.80623
41	37	HMBS	7.10358	4.93142
41	38	HMBS	7.25654	5.06434
41	39	HMBS	7.33425	5.12201
41	40	HMBS	7.43347	5.20119
42	1	HMBS	1.55541	-0.0499086
42	2	HMBS	1.5889	-0.0417515
42	3	HMBS	1.64435	-0.0116369
42	4	HMBS	1.68256	0.00123633
42	5	HMBS	1.7063	-0.000357664
42	6	HMBS	1.73731	0.00531463
42	7	HMBS	1.76077	0.003443
42	8	HMBS	1.78922	0.00656254
42	9	HMBS	1.80993	0.00193121
42	10	HMBS	1.8284	-0.00492468
42	11	HMBS	1.85194	-0.00671918
42	12	HMBS	1.88277	-0.0012288
42	13	HMBS	1.91804	0.00870903
42	14	HMBS	1.94482	0.0101569
42	15	HMBS	1.96213	0.00213026
42	16	HMBS	1.98043	-0.0049023
42	17	HMBS	2.00096	-0.00971435
42	18	HMBS	2.021	-0.0150065
42	19	HMBS	2.06976	0.00841682
42	20	HMBS	2.14668	0.0600019
42	21	HMBS	2.25912	0.147115
42	22	HMBS	2.46432	0.326974
42	23	HMBS	2.79733	0.634647
42	24	HMBS	3.25481	1.0668
42	25	HMBS	3.7642	1.55085
42	26	HMBS	4.26248	2.02379
42	27	HMBS	4.70184	2.43782
42	28	HMBS	5.09647	2.80712
42	29	HMBS	5.44721	3.13252
42	30	HMBS	5.76024	3.42022
42	31	HMBS	6.00524	3.63989
42	32	HMBS	6.2185	3.82781
42	33	HMBS	6.42004	4.00402
42	34	HMBS	6.61026	4.1689
42	35	HMBS	6.73828	4.27159
42	36	HMBS	6.84984	4.35781
42	37	HMBS	6.96096	4.4436
42	38	HMBS	7.0545	4.5118
42	39	HMBS	7.14457	4.57654
42	40	HMBS	7.17937	4.58601
43	1	HMBS	1.68998	-0.0134134
43	2	HMBS	1.70329	-0.00797827
43	3	HMBS	1.71676	-0.00236983
43	4	HMBS	1.72367	-0.0033334
43	5	HMBS	1.7344	-0.000464039
43	6	HMBS	1.74211	-0.000627002
43	7	HMBS	1.75044	-0.000162209
43	8	HMBS	1.75984	0.0013732
43	9	HMBS	1.76776	0.00142172
43	10	HMBS	1.77462	0.000415349
43	11	HMBS	1.78948	0.00740554
43	12	HMBS	1.79414	0.00420155
43	13	HMBS	1.80038	0.00257422
43	14	HMBS	1.80169	-0.00398587
43	15	HMBS	1.81489	0.00135172
43	16	HMBS	1.81888	-0.00252426
43	17	HMBS	1.824	-0.00527668
43	18	HMBS	1.83588	-0.00126136
43	19	HMBS	1.85271	0.00770127
43	20	HMBS	1.88735	0.0344719
43	21	HMBS	1.94126	0.0805158
43	22	HMBS	2.03266	0.16405
43	23	HMBS	2.20071	0.324229
43	24	HMBS	2.47683	0.592486
43	25	HMBS	2.89345	1.00124
43	26	HMBS	3.38464	1.48456
43	27	HMBS	3.86309	1.95515
43	28	HMBS	4.29255	2.37673
43	29	HMBS	4.6587	2.73501
43	30	HMBS	4.97083	3.03928
43	31	HMBS	5.2345	3.29508
43	32	HMBS	5.4681	3.52082
43	33	HMBS	5.65894	3.70379
43	34	HMBS	5.83754	3.87452
43	35	HMBS	5.96593	3.99505
43	36	HMBS	6.08035	4.10159
43	37	HMBS	6.16762	4.181
43	38	HMBS	6.30635	4.31186
43	39	HMBS	6.39838	4.39602
43	40	HMBS	6.46387	4.45365
44	1	HMBS	1.04059	-0.0370496
44	2	HMBS	1.06483	-0.0309642
44	3	HMBS	1.10313	-0.0108251
44	4	HMBS	1.12602	-0.00609405
44	5	HMBS	1.14972	-0.000553084
44	6	HMBS	1.17046	0.00202506
44	7	HMBS	1.18949	0.00289648
44	8	HMBS	1.20573	0.000975309
44	9	HMBS	1.22431	0.0013966
44	10	HMBS	1.24656	0.00549538
44	11	HMBS	1.26795	0.00871987
44	12	HMBS	1.28766	0.010277
44	13	HMBS	1.30457	0.00902434
44	14	HMBS	1.31062	-0.00308255
44	15	HMBS	1.32666	-0.00520579
44	16	HMBS	1.34988	-0.000138553
44	17	HMBS	1.36102	-0.00716188
44	18	HMBS	1.37859	-0.00774899
44	19	HMBS	1.40562	0.00111995
44	20	HMBS	1.45421	0.0315563
44	21	HMBS	1.53478	0.0939628
44	22	HMBS	1.67575	0.216781
44	23	HMBS	1.92652	0.449386
44	24	HMBS	2.32603	0.830739
44	25	HMBS	2.88893	1.37548
44	26	HMBS	3.5295	1.99789
44	27	HMBS	4.14908	2.59931
44	28	HMBS	4.69415	3.12622
44	29	HMBS	5.15472	3.56863
44	30	HMBS	5.55221	3.94796
44	31	HMBS	5.89793	4.27553
44	32	HMBS	6.19286	4.5523
44	33	HMBS	6.43835	4.77963
44	34	HMBS	6.66517	4.9883
44	35	HMBS	6.84775	5.15271
44	36	HMBS	6.99552	5.28232
44	37	HMBS	7.12949	5.39814
44	38	HMBS	7.25236	5.50285
44	39	HMBS	7.38194	5.61426
44	40	HMBS	7.49218	5.70635
45	1	HMBS	1.6032	-0.0807199
45	2	HMBS	1.63749	-0.0728046
45	3	HMBS	1.70931	-0.027367
45	4	HMBS	1.75353	-0.00952346
45	5	HMBS	1.79121	0.00177213
45	6	HMBS	1.81943	0.00361274
45	7	HMBS	1.84543	0.0032375
45	8	HMBS	1.88075	0.0121746
45	9	HMBS	1.90469	0.00974066
45	10	HMBS	1.9337	0.0123716
45	11	HMBS	1.95985	0.0121387
45	12	HMBS	1.98585	0.0117601
45	13	HMBS	2.00683	0.00636845
45	14	HMBS	2.02379	-0.00305669
45	15	HMBS	2.04913	-0.00409569
45	16	HMBS	2.07094	-0.00866233
45	17	HMBS	2.09389	-0.0120912
45	18	HMBS	2.12398	-0.00838023
45	19	HMBS	2.15754	-0.00119308
45	20	HMBS	2.20301	0.0178921
45	21	HMBS	2.27315	0.0616625
45	22	HMBS	2.40088	0.163005
45	23	HMBS	2.6262	0.361954
45	24	HMBS	2.98565	0.69502
45	25	HMBS	3.5143	1.19729
45	26	HMBS	4.19989	1.85651
45	27	HMBS	4.94257	2.5728
45	28	HMBS	5.59398	3.19784
45	29	HMBS	6.16149	3.73897
45	30	HMBS	6.64998	4.20108
45	31	HMBS	7.05951	4.58423
45	32	HMBS	7.43104	4.92938
45	33	HMBS	7.7615	5.23346
45	34	HMBS	8.06555	5.51114
45	35	HMBS	8.30507	5.72427
45	36	HMBS	8.50376	5.89659
45	37	HMBS	8.64982	6.01627
45	38	HMBS	8.81824	6.15831
45	39	HMBS	8.95107	6.26477
45	40	HMBS	9.06863	6.35594
46	1	HMBS	2.02394	-0.0790851
46	2	HMBS	2.07149	-0.0675088
46	3	HMBS	2.13696	-0.0380186
46	4	HMBS	2.1858	-0.0251568
46	5	HMBS	2.25023	0.00329572
46	6	HMBS	2.29343	0.0105261
46	7	HMBS	2.31878	-0.000108184
46	8	HMBS	2.35914	0.00427431
46	9	HMBS	2.40848	0.0176411
46	10	HMBS	2.45913	0.0323099
46	11	HMBS	2.49681	0.0340202
46	12	HMBS	2.52573	0.026957
46	13	HMBS	2.54349	0.00874048
46	14	HMBS	2.56053	-0.0102003
46	15	HMBS	2.5958	-0.010905
46	16	HMBS	2.6205	-0.0221794
46	17	HMBS	2.64746	-0.0311965
46	18	HMBS	2.68107	-0.0335694
46	19	HMBS	2.72634	-0.0242717
46	20	HMBS	2.79616	0.00956981
46	21	HMBS	2.9057	0.0831299
46	22	HMBS	3.09756	0.23902
46	23	HMBS	3.42424	0.529714
46	24	HMBS	3.91673	0.986227
46	25	HMBS	4.54095	1.57448
46	26	HMBS	5.20853	2.20608
46	27	HMBS	5.83595	2.79752
46	28	HMBS	6.35419	3.27978
46	29	HMBS	6.81915	3.70877
46	30	HMBS	7.20792	4.06156
46	31	HMBS	7.53669	4.35435
46	32	HMBS	7.85124	4.63293
46	33	HMBS	8.11568	4.86139
46	34	HMBS	8.34721	5.05693
46	35	HMBS	8.61149	5.28524
46	36	HMBS	8.77141	5.40919
46	37	HMBS	8.82054	5.42234
46	38	HMBS	8.97118	5.537
46	39	HMBS	9.14145	5.67129
46	40	HMBS	9.24558	5.73944
47	1	HMBS	1.13524	-0.0656569
47	2	HMBS	1.17227	-0.0451396
47	3	HMBS	1.22516	-0.00874677
47	4	HMBS	1.24935	-0.0010697
47	5	HMBS	1.2626	-0.00432447
47	6	HMBS	1.27822	-0.0052027
47	7	HMBS	1.29457	-0.0053591
47	8	HMBS	1.32078	0.00434703
47	9	HMBS	1.34844	0.0154946
47	10	HMBS	1.35927	0.00982623
47	11	HMBS	1.3643	-0.00165244
47	12	HMBS	1.39325	0.0107916
47	13	HMBS	1.41072	0.0117545
47	14	HMBS	1.41516	-0.000306108
47	15	HMBS	1.42313	-0.00884341
47	16	HMBS	1.44039	-0.00808882
47	17	HMBS	1.4592	-0.00577676
47	18	HMBS	1.47864	-0.00284374
47	19	HMBS	1.50117	0.00317978
47	20	HMBS	1.53423	0.0197339
47	21	HMBS	1.59281	0.061804
47	22	HMBS	1.69654	0.149032
47	23	HMBS	1.86237	0.298357
47	24	HMBS	2.16157	0.581052
47	25	HMBS	2.60278	1.00576
47	26	HMBS	3.15274	1.53921
47	27	HMBS	3.71053	2.08049
47	28	HMBS	4.22462	2.57808
47	29	HMBS	4.69214	3.0291
47	30	HMBS	5.09193	3.41239
47	31	HMBS	5.42148	3.72543
47	32	HMBS	5.72019	4.00764
47	33	HMBS	5.95391	4.22485
47	34	HMBS	6.16028	4.41471
47	35	HMBS	6.33891	4.57684
47	36	HMBS	6.50323	4.72465
47	37	HMBS	6.62668	4.8316
47	38	HMBS	6.73532	4.92373
47	39	HMBS	6.83844	5.01035
47	40	HMBS	6.92366	5.07907
48	1	HMBS	0.959862	-0.0434289
48	2	HMBS	0.988562	-0.0340489
48	3	HMBS	1.03021	-0.0117206
48	4	HMBS	1.05644	-0.00481288
48	5	HMBS	1.08031	-0.000262444
48	6	HMBS	1.10257	0.00267652
48	7	HMBS	1.1199	0.000691072
48	8	HMBS	1.14435	0.00581884
48	9	HMBS	1.16796	0.0101093
48	10	HMBS	1.18358	0.00641318
48	11	HMBS	1.2009	0.00441772
48	12	HMBS	1.21849	0.00268356
48	13	HMBS	1.23722	0.00209095
48	14	HMBS	1.2518	-0.0026418
48	15	HMBS	1.2651	-0.00866522
48	16	HMBS	1.28748	-0.0056024
48	17	HMBS	1.30909	-0.00330931
48	18	HMBS	1.33384	0.0021135
48	19	HMBS	1.36014	0.00909259
48	20	HMBS	1.40931	0.0389448
48	21	HMBS	1.49286	0.10318
48	22	HMBS	1.64969	0.240693
48	23	HMBS	1.90655	0.478229
48	24	HMBS	2.29549	0.847845
48	25	HMBS	2.82006	1.3531
48	26	HMBS	3.37973	1.89345
48	27	HMBS	3.91051	2.40491
48	28	HMBS	4.36753	2.84261
48	29	HMBS	4.7706	3.22636
48	30	HMBS	5.11953	3.55597
48	31	HMBS	5.41531	3.83243
48	32	HMBS	5.66836	4.06616
48	33	HMBS	5.87412	4.2526
48	34	HMBS	6.06005	4.41921
48	35	HMBS	6.20864	4.54849
48	36	HMBS	6.33789	4.65842
48	37	HMBS	6.46943	4.77063
48	38	HMBS	6.57833	4.86022
48	39	HMBS	6.67275	4.93532
48	40	HMBS	6.77802	5.02126
49	1	HMBS	0.862901	-0.0270046
49	2	HMBS	0.880473	-0.0220138
49	3	HMBS	0.91004	-0.00502789
49	4	HMBS	0.921556	-0.00609326
49	5	HMBS	0.93581	-0.00441997
49	6	HMBS	0.949655	-0.00315623
49	7	HMBS	0.971827	0.00643458
49	8	HMBS	0.979046	0.00107196
49	9	HMBS	0.990677	0.000121684
49	10	HMBS	1.01397	0.0108366
49	11	HMBS	1.02995	0.0142327
49	12	HMBS	1.0372	0.00890015
49	13	HMBS	1.03875	-0.00212968
49	14	HMBS	1.04609	-0.00736964
49	15	HMBS	1.06161	-0.00443435
49	16	HMBS	1.07476	-0.00386273
49	17	HMBS	1.0861	-0.00510393
49	18	HMBS	1.10527	0.0014862
49	19	HMBS	1.13565	0.0192861
49	20	HMBS	1.18901	0.0600565
49	21	HMBS	1.27712	0.135586
49	22	HMBS	1.43586	0.281746
49	23	HMBS	1.72164	0.554943
49	24	HMBS	2.18182	1.00255
49	25	HMBS	2.80267	1.61082
49	26	HMBS	3.46869	2.26426
49	27	HMBS	4.08531	2.8683
49	28	HMBS	4.62994	3.40034
49	29	HMBS	5.11042	3.86824
49	30	HMBS	5.52361	4.26884
49	31	HMBS	5.86517	4.59782
49	32	HMBS	6.1439	4.86397
49	33	HMBS	6.36263	5.07012
49	34	HMBS	6.52588	5.2208
49	35	HMBS	6.69114	5.37347
49	36	HMBS	6.85209	5.52185
49	37	HMBS	7.01039	5.66756
49	38	HMBS	7.1361	5.78069
49	39	HMBS	7.17074	5.80275
49	40	HMBS	7.25844	5.87787
50	1	HMBS	2.35094	-0.0451375
50	2	HMBS	2.36936	-0.0415846
50	3	HMBS	2.40372	-0.0220911
50	4	HMBS	2.43036	-0.0103169
[truncated: 13,396 more rows]

## Sheet: Results
Block Type	384-Well Block
Calibration Background is expired	Yes
Calibration Background performed on	2016-02-12 13:07:10 PM PST
Calibration FAM is expired	Yes
Calibration FAM performed on	2016-02-12 14:10:50 PM PST
Calibration NED is expired	Yes
Calibration NED performed on	2014-11-24 13:16:28 PM PST
Calibration ROI is expired	Yes
Calibration ROI performed on	2016-02-12 12:57:08 PM PST
Calibration ROX is expired	Yes
Calibration ROX performed on	2016-02-12 14:26:17 PM PST
Calibration SYBR is expired	Yes
Calibration SYBR performed on	2016-02-12 14:49:42 PM PST
Calibration TAMRA is expired	Yes
Calibration TAMRA performed on	2016-02-12 14:38:45 PM PST
Calibration Uniformity is expired	Yes
Calibration Uniformity performed on	2016-02-12 13:16:49 PM PST
Calibration VIC is expired	Yes
Calibration VIC performed on	2016-02-12 14:01:38 PM PST
Chemistry	SYBR_GREEN
Experiment Barcode
Experiment Comments
Experiment File Name	D:\Documents and Settings\INSTR-USER\Viia7 Experiments\Kenney Lab\2016-11-21 101524 BALD ALK BRCA1 PDCD1 HMBS.eds
Experiment Name	2016-11-21 101524 BALD ALK BRCA1 PDCD1 HMBS
Experiment Run Start Time	2016-11-21 11:10:35 AM PST
Experiment Run Stop Time	2016-11-21 12:57:52 PM PST
Experiment Type	Comparative Cт (ΔΔCт)
Experiment User Name	SHARI
Instrument Name	278880281
Instrument Serial Number	278880281
Instrument Type	ViiA(TM) 7 System
Passive Reference	ROX
Quantification Cycle Method	Ct
Signal Smoothing On	true
Stage/ Cycle where Analysis is performed	Stage 2, Step 2
Well	Well Position	Omit	Sample Name	Target Name	Task	Reporter	Quencher	Quantity	Quantity Mean	Quantity SD	RQ	RQ Min	RQ Max	CT	Ct Mean	Ct SD	Delta Ct	Delta Ct Mean	Delta Ct SE	Delta Delta Ct	Automatic Ct Threshold	Ct Threshold	Automatic Baseline	Baseline Start	Baseline End	Comments	Custom1	Custom2	Custom3	Custom4	Custom5	Custom6	Tm1	Tm2	Tm3	MTP
1	A1	FALSE	CY L 13-126 U	HMBS	UNKNOWN	SYBR	None							21.0918	20.854	0.43674					TRUE	0.142622	TRUE	1	40								82.304			N
2	A2	FALSE	CY L 11-30 U	HMBS	UNKNOWN	SYBR	None							20.7122	21.2423	0.671433					TRUE	0.142622	TRUE	1	40								82.17			N
3	A3	FALSE	CY L 13-126 T	HMBS	UNKNOWN	SYBR	None							20.3052	20.2695	0.168836					TRUE	0.142622	TRUE	1	40								82.17			N
4	A4	FALSE	CY L 11-30 T	HMBS	UNKNOWN	SYBR	None							20.1407	20.4037	0.660453					TRUE	0.142622	TRUE	1	40								82.17			N
5	A5	FALSE	CY L 13-125 U	HMBS	UNKNOWN	SYBR	None							20.8584	20.8038	0.110433					TRUE	0.142622	TRUE	1	40								82.17			N
6	A6	FALSE	CY D 13-55 U	HMBS	UNKNOWN	SYBR	None							20.4931	20.4666	0.031018					TRUE	0.142622	TRUE	1	40								82.036			N
7	A7	FALSE	CY L 13-125 T	HMBS	UNKNOWN	SYBR	None							21.3448	21.4066	0.0652405					TRUE	0.142622	TRUE	1	40								82.17			N
8	A8	FALSE	CY D 13-55 T	HMBS	UNKNOWN	SYBR	None							20.9736	21.0406	0.154202					TRUE	0.142622	TRUE	1	40								82.17			N
9	A9	FALSE	CY L 13-124 U	HMBS	UNKNOWN	SYBR	None							20.6008	20.7595	0.17041					TRUE	0.142622	TRUE	1	40								82.036			N
10	A10	FALSE	CY D 11-29 U	HMBS	UNKNOWN	SYBR	None							21.8197	21.6901	0.234658					TRUE	0.142622	TRUE	1	40								82.17			N
11	A11	FALSE	CY L 13-124 T	HMBS	UNKNOWN	SYBR	None							20.8883	21.0328	0.327717					TRUE	0.142622	TRUE	1	40								82.036			N
12	A12	FALSE	CY D 11-29 T	HMBS	UNKNOWN	SYBR	None							22.8718	22.8217	0.105279					TRUE	0.142622	TRUE	1	40								82.036			N
13	A13	FALSE	CY L 11-38 U	HMBS	UNKNOWN	SYBR	None							21.0409	21.1156	0.195591					TRUE	0.142622	TRUE	1	40								82.17			N
14	A14	FALSE	CY D 11-18 U	HMBS	UNKNOWN	SYBR	None							20.9458	20.9132	0.103802					TRUE	0.142622	TRUE	1	40								82.036			N
15	A15	FALSE	CY L 11-38 T	HMBS	UNKNOWN	SYBR	None							21.1018	21.1346	0.141347					TRUE	0.142622	TRUE	1	40								81.9019			N
16	A16	FALSE	CY D 11-18 T	HMBS	UNKNOWN	SYBR	None							21.4888	21.5965	0.157271					TRUE	0.142622	TRUE	1	40								82.036			N
17	A17	FALSE	CY B 13-68 U	HMBS	UNKNOWN	SYBR	None							21.0314	21.1516	0.301137					TRUE	0.142622	TRUE	1	40								81.9019			N
18	A18	FALSE	CY A 11-16 U	HMBS	UNKNOWN	SYBR	None							21.2311	20.9703	0.251235					TRUE	0.142622	TRUE	1	40								82.036			N
19	A19	FALSE	CY B 13-68 T	HMBS	UNKNOWN	SYBR	None							21.7272	21.7713	0.0400839					TRUE	0.142622	TRUE	1	40								82.036			N
20	A20	FALSE	CY A 11-16 T	HMBS	UNKNOWN	SYBR	None							21.4377	21.3374	0.232978					TRUE	0.142622	TRUE	1	40								81.9019			N
21	A21	FALSE	CY B 12-40 U	HMBS	UNKNOWN	SYBR	None							22.5913	22.2823	0.386187					TRUE	0.142622	TRUE	1	40								82.036			N
22	A22	FALSE	CY A 11-14 U	HMBS	UNKNOWN	SYBR	None							21.5156	21.4127	0.139833					TRUE	0.142622	TRUE	1	40								81.9019			N
23	A23	FALSE	CY B 12-40 T	HMBS	UNKNOWN	SYBR	None							21.8193	22.0291	0.232435					TRUE	0.142622	TRUE	1	40								82.036			N
24	A24	FALSE	CY A 11-14 T	HMBS	UNKNOWN	SYBR	None							21.4964	21.4368	0.071066					TRUE	0.142622	TRUE	1	40								81.9019			N
25	B1	FALSE	CY L 13-126 U	HMBS	UNKNOWN	SYBR	None							20.35	20.854	0.43674					TRUE	0.142622	TRUE	1	40								82.304			N
26	B2	FALSE	CY L 11-30 U	HMBS	UNKNOWN	SYBR	None							21.0174	21.2423	0.671433					TRUE	0.142622	TRUE	1	40								82.17			N
27	B3	FALSE	CY L 13-126 T	HMBS	UNKNOWN	SYBR	None							20.0856	20.2695	0.168836					TRUE	0.142622	TRUE	1	40								82.304			N
28	B4	FALSE	CY L 11-30 T	HMBS	UNKNOWN	SYBR	None							19.9153	20.4037	0.660453					TRUE	0.142622	TRUE	1	40								82.17			N
29	B5	FALSE	CY L 13-125 U	HMBS	UNKNOWN	SYBR	None							20.6767	20.8038	0.110433					TRUE	0.142622	TRUE	1	40								82.17			N
30	B6	FALSE	CY D 13-55 U	HMBS	UNKNOWN	SYBR	None							20.4742	20.4666	0.031018					TRUE	0.142622	TRUE	1	40								82.17			N
31	B7	FALSE	CY L 13-125 T	HMBS	UNKNOWN	SYBR	None							21.4001	21.4066	0.0652405					TRUE	0.142622	TRUE	1	40								82.17			N
32	B8	FALSE	CY D 13-55 T	HMBS	UNKNOWN	SYBR	None							20.9313	21.0406	0.154202					TRUE	0.142622	TRUE	1	40								82.17			N
33	B9	FALSE	CY L 13-124 U	HMBS	UNKNOWN	SYBR	None							20.9396	20.7595	0.17041					TRUE	0.142622	TRUE	1	40								82.036			N
34	B10	FALSE	CY D 11-29 U	HMBS	UNKNOWN	SYBR	None							21.8315	21.6901	0.234658					TRUE	0.142622	TRUE	1	40								82.17			N
35	B11	FALSE	CY L 13-124 T	HMBS	UNKNOWN	SYBR	None							21.4079	21.0328	0.327717					TRUE	0.142622	TRUE	1	40								82.036			N
36	B12	FALSE	CY D 11-29 T	HMBS	UNKNOWN	SYBR	None							22.8926	22.8217	0.105279					TRUE	0.142622	TRUE	1	40								82.036			N
37	B13	FALSE	CY L 11-38 U	HMBS	UNKNOWN	SYBR	None							21.3376	21.1156	0.195591					TRUE	0.142622	TRUE	1	40								82.17			N
38	B14	FALSE	CY D 11-18 U	HMBS	UNKNOWN	SYBR	None							20.9968	20.9132	0.103802					TRUE	0.142622	TRUE	1	40								82.036			N
39	B15	FALSE	CY L 11-38 T	HMBS	UNKNOWN	SYBR	None							21.2894	21.1346	0.141347					TRUE	0.142622	TRUE	1	40								82.036			N
40	B16	FALSE	CY D 11-18 T	HMBS	UNKNOWN	SYBR	None							21.777	21.5965	0.157271					TRUE	0.142622	TRUE	1	40								82.036			N
41	B17	FALSE	CY B 13-68 U	HMBS	UNKNOWN	SYBR	None							20.9292	21.1516	0.301137					TRUE	0.142622	TRUE	1	40								82.036			N
42	B18	FALSE	CY A 11-16 U	HMBS	UNKNOWN	SYBR	None							20.95	20.9703	0.251235					TRUE	0.142622	TRUE	1	40								81.9019			N
43	B19	FALSE	CY B 13-68 T	HMBS	UNKNOWN	SYBR	None							21.8055	21.7713	0.0400839					TRUE	0.142622	TRUE	1	40								82.036	90.8825		Y
44	B20	FALSE	CY A 11-16 T	HMBS	UNKNOWN	SYBR	None							21.5034	21.3374	0.232978					TRUE	0.142622	TRUE	1	40								81.9019			N
45	B21	FALSE	CY B 12-40 U	HMBS	UNKNOWN	SYBR	None							21.8493	22.2823	0.386187					TRUE	0.142622	TRUE	1	40								82.036			N
46	B22	FALSE	CY A 11-14 U	HMBS	UNKNOWN	SYBR	None							21.4689	21.4127	0.139833					TRUE	0.142622	TRUE	1	40								81.9019			N
47	B23	FALSE	CY B 12-40 T	HMBS	UNKNOWN	SYBR	None							21.9889	22.0291	0.232435					TRUE	0.142622	TRUE	1	40								82.036			N
48	B24	FALSE	CY A 11-14 T	HMBS	UNKNOWN	SYBR	None							21.3582	21.4368	0.071066					TRUE	0.142622	TRUE	1	40								81.9019			N
49	C1	FALSE	CY L 13-126 U	HMBS	UNKNOWN	SYBR	None							21.1203	20.854	0.43674					TRUE	0.142622	TRUE	1	40								82.17			N
50	C2	FALSE	CY L 11-30 U	HMBS	UNKNOWN	SYBR	None							21.9973	21.2423	0.671433					TRUE	0.142622	TRUE	1	40								82.036			N
51	C3	FALSE	CY L 13-126 T	HMBS	UNKNOWN	SYBR	None							20.4176	20.2695	0.168836					TRUE	0.142622	TRUE	1	40								82.17			N
52	C4	FALSE	CY L 11-30 T	HMBS	UNKNOWN	SYBR	None							21.1552	20.4037	0.660453					TRUE	0.142622	TRUE	1	40								81.6338			N
53	C5	FALSE	CY L 13-125 U	HMBS	UNKNOWN	SYBR	None							20.8763	20.8038	0.110433					TRUE	0.142622	TRUE	1	40								82.17			N
54	C6	FALSE	CY D 13-55 U	HMBS	UNKNOWN	SYBR	None							20.4325	20.4666	0.031018					TRUE	0.142622	TRUE	1	40								82.17			N
55	C7	FALSE	CY L 13-125 T	HMBS	UNKNOWN	SYBR	None							21.4748	21.4066	0.0652405					TRUE	0.142622	TRUE	1	40								82.17			N
56	C8	FALSE	CY D 13-55 T	HMBS	UNKNOWN	SYBR	None							21.217	21.0406	0.154202					TRUE	0.142622	TRUE	1	40								82.17			N
57	C9	FALSE	CY L 13-124 U	HMBS	UNKNOWN	SYBR	None							20.738	20.7595	0.17041					TRUE	0.142622	TRUE	1	40								81.9019			N
58	C10	FALSE	CY D 11-29 U	HMBS	UNKNOWN	SYBR	None							21.4193	21.6901	0.234658					TRUE	0.142622	TRUE	1	40								82.036			N
59	C11	FALSE	CY L 13-124 T	HMBS	UNKNOWN	SYBR	None							20.8022	21.0328	0.327717					TRUE	0.142622	TRUE	1	40								82.036			N
60	C12	FALSE	CY D 11-29 T	HMBS	UNKNOWN	SYBR	None							22.7007	22.8217	0.105279					TRUE	0.142622	TRUE	1	40								82.036			N
61	C13	FALSE	CY L 11-38 U	HMBS	UNKNOWN	SYBR	None							20.9684	21.1156	0.195591					TRUE	0.142622	TRUE	1	40								82.036			N
62	C14	FALSE	CY D 11-18 U	HMBS	UNKNOWN	SYBR	None							20.797	20.9132	0.103802					TRUE	0.142622	TRUE	1	40								82.036			N
63	C15	FALSE	CY L 11-38 T	HMBS	UNKNOWN	SYBR	None							21.0125	21.1346	0.141347					TRUE	0.142622	TRUE	1	40								82.036			N
64	C16	FALSE	CY D 11-18 T	HMBS	UNKNOWN	SYBR	None							21.5237	21.5965	0.157271					TRUE	0.142622	TRUE	1	40								82.036			N
65	C17	FALSE	CY B 13-68 U	HMBS	UNKNOWN	SYBR	None							21.4943	21.1516	0.301137					TRUE	0.142622	TRUE	1	40								81.9019			N
66	C18	FALSE	CY A 11-16 U	HMBS	UNKNOWN	SYBR	None							20.7299	20.9703	0.251235					TRUE	0.142622	TRUE	1	40								81.9019			N
67	C19	FALSE	CY B 13-68 T	HMBS	UNKNOWN	SYBR	None							21.7812	21.7713	0.0400839					TRUE	0.142622	TRUE	1	40								81.9019			N
68	C20	FALSE	CY A 11-16 T	HMBS	UNKNOWN	SYBR	None							21.0711	21.3374	0.232978					TRUE	0.142622	TRUE	1	40								81.7679			N
69	C21	FALSE	CY B 12-40 U	HMBS	UNKNOWN	SYBR	None							22.4063	22.2823	0.386187					TRUE	0.142622	TRUE	1	40								82.036			N
70	C22	FALSE	CY A 11-14 U	HMBS	UNKNOWN	SYBR	None							21.2535	21.4127	0.139833					TRUE	0.142622	TRUE	1	40								81.9019			N
71	C23	FALSE	CY B 12-40 T	HMBS	UNKNOWN	SYBR	None							22.279	22.0291	0.232435					TRUE	0.142622	TRUE	1	40								81.9019			N
72	C24	FALSE	CY A 11-14 T	HMBS	UNKNOWN	SYBR	None							21.4558	21.4368	0.071066					TRUE	0.142622	TRUE	1	40								81.9019			N
73	D1	FALSE	CY L 13-126 U	ALK	UNKNOWN	SYBR	None				1	0.41379	2.41669	28.7205	29.48	0.663291		8.62596	0.458511	0	TRUE	0.0561964	TRUE	1	40								78.685			N
74	D2	FALSE	CY L 11-30 U	ALK	UNKNOWN	SYBR	None				8.08455	3.55669	18.3766	27.1086	26.8531	0.308749		5.6108	0.426673	-3.01517	TRUE	0.0561964	TRUE	1	40								78.685			N
75	D3	FALSE	CY L 13-126 T	ALK	UNKNOWN	SYBR	None				0.544693	0.130806	2.26817	28.9737	29.7719	1.27272		9.50245	0.74124	0.876486	TRUE	0.0561964	TRUE	1	40								78.819			N
76	D4	FALSE	CY L 11-30 T	ALK	UNKNOWN	SYBR	None				0.0459956	0.0182344	0.116022	32.8894	33.4721	0.507171		13.0683	0.480771	4.44236	TRUE	0.0561964	TRUE	1	40								78.819			N
77	D5	FALSE	CY L 13-125 U	ALK	UNKNOWN	SYBR	None				0.968772	0.571387	1.64253	29.4662	29.4755	0.462159		8.67173	0.274339	0.0457713	TRUE	0.0561964	TRUE	1	40								78.685			N
78	D6	FALSE	CY D 13-55 U	ALK	UNKNOWN	SYBR	None				4.63456	3.53796	6.07105	26.7961	26.8801	0.241006		6.41353	0.140292	-2.21243	TRUE	0.0561964	TRUE	1	40								78.685			N
79	D7	FALSE	CY L 13-125 T	ALK	UNKNOWN	SYBR	None							Undetermined	32.585	0.941074					TRUE	0.0561964	TRUE	1	40								79.7573	84.0465		Y
80	D8	FALSE	CY D 13-55 T	ALK	UNKNOWN	SYBR	None				13.0902	9.78089	17.5192	25.7201	25.9562	0.212175		4.91555	0.151434	-3.71041	TRUE	0.0561964	TRUE	1	40								78.5509			N
81	D9	FALSE	CY L 13-124 U	ALK	UNKNOWN	SYBR	None				0.581469	0.266171	1.27026	29.7859	30.1677	0.682324		9.40819	0.40604	0.782225	TRUE	0.0561964	TRUE	1	40								78.5509			N
82	D10	FALSE	CY D 11-29 U	ALK	UNKNOWN	SYBR	None				5.70548	4.29218	7.58416	27.9199	27.8038	0.102761		6.11361	0.147901	-2.51235	TRUE	0.0561964	TRUE	1	40								78.819			N
83	D11	FALSE	CY L 13-124 T	ALK	UNKNOWN	SYBR	None				0.122757	0.0703973	0.21406	32.5183	32.6849	0.23555		11.6521	0.252074	3.02612	TRUE	0.0561964	TRUE	1	40								78.685			N
84	D12	FALSE	CY D 11-29 T	ALK	UNKNOWN	SYBR	None				1.48506	0.82408	2.6762	30.6508	30.8772	0.519492		8.05544	0.306026	-0.57052	TRUE	0.0561964	TRUE	1	40								78.685			N
85	D13	FALSE	CY L 11-38 U	ALK	UNKNOWN	SYBR	None				7.02682	5.1985	9.49817	26.7222	26.9287	0.187909		5.81309	0.156595	-2.81287	TRUE	0.0561964	TRUE	1	40								78.685			N
86	D14	FALSE	CY D 11-18 U	ALK	UNKNOWN	SYBR	None				2.2535	1.67011	3.04067	28.324	28.367	0.248856		7.45379	0.155675	-1.17217	TRUE	0.0561964	TRUE	1	40								78.819			N
87	D15	FALSE	CY L 11-38 T	ALK	UNKNOWN	SYBR	None				0.0719275	0.0466774	0.110837	33.3836	33.5579	0.362585		12.4233	0.224683	3.79731	TRUE	0.0561964	TRUE	1	40								78.685			N
88	D16	FALSE	CY D 11-18 T	ALK	UNKNOWN	SYBR	None				12.1007	8.29972	17.6423	26.4787	26.6254	0.300693		5.02895	0.195917	-3.59702	TRUE	0.0561964	TRUE	1	40								78.685			N
89	D17	FALSE	CY B 13-68 U	ALK	UNKNOWN	SYBR	None				30.852	19.2974	49.3253	24.9945	24.8303	0.296085		3.67867	0.243824	-4.94729	TRUE	0.0561964	TRUE	1	40								78.4169			N
90	D18	FALSE	CY A 11-16 U	ALK	UNKNOWN	SYBR	None				0.577095	0.435099	0.765433	30.4085	30.3894	0.0386619		9.41908	0.146758	0.793118	TRUE	0.0561964	TRUE	1	40								78.5509			N
91	D19	FALSE	CY B 13-68 T	ALK	UNKNOWN	SYBR	None				0.379058	0.244385	0.587945	31.8955	31.7968	0.393014		10.0255	0.228084	1.39951	TRUE	0.0561964	TRUE	1	40								78.5509			N
92	D20	FALSE	CY A 11-16 T	ALK	UNKNOWN	SYBR	None				0.0916242	0.0435481	0.192775	32.7481	33.4115	0.627605		12.0741	0.386509	3.44813	TRUE	0.0561964	TRUE	1	40								78.5509			N
93	D21	FALSE	CY B 12-40 U	ALK	UNKNOWN	SYBR	None				35.2075	18.6868	66.3338	26.2102	25.7704	0.419374		3.48815	0.329148	-5.13781	TRUE	0.0561964	TRUE	1	40								78.5509			N
94	D22	FALSE	CY A 11-14 U	ALK	UNKNOWN	SYBR	None				2.76797	1.31717	5.81672	28.1383	28.5698	0.653576		7.15714	0.385882	-1.46883	TRUE	0.0561964	TRUE	1	40								78.5509			N
95	D23	FALSE	CY B 12-40 T	ALK	UNKNOWN	SYBR	None				15.7099	9.5785	25.7662	27.0594	26.6814	0.379821		4.65236	0.257093	-3.9736	TRUE	0.0561964	TRUE	1	40								78.4169			N
96	D24	FALSE	CY A 11-14 T	ALK	UNKNOWN	SYBR	None				0.23903	0.0945887	0.604039	31.3917	32.1275	0.831321		10.6907	0.481714	2.06474	TRUE	0.0561964	TRUE	1	40								78.5509			N
97	E1	FALSE	CY L 13-126 U	ALK	UNKNOWN	SYBR	None				1	0.41379	2.41669	29.9451	29.48	0.663291		8.62596	0.458511	0	TRUE	0.0561964	TRUE	1	40								78.685			N
98	E2	FALSE	CY L 11-30 U	ALK	UNKNOWN	SYBR	None				8.08455	3.55669	18.3766	26.51	26.8531	0.308749		5.6108	0.426673	-3.01517	TRUE	0.0561964	TRUE	1	40								78.685			N
99	E3	FALSE	CY L 13-126 T	ALK	UNKNOWN	SYBR	None				0.544693	0.130806	2.26817	29.1024	29.7719	1.27272		9.50245	0.74124	0.876486	TRUE	0.0561964	TRUE	1	40								78.819			N
100	E4	FALSE	CY L 11-30 T	ALK	UNKNOWN	SYBR	None				0.0459956	0.0182344	0.116022	33.8141	33.4721	0.507171		13.0683	0.480771	4.44236	TRUE	0.0561964	TRUE	1	40								78.819			N
101	E5	FALSE	CY L 13-125 U	ALK	UNKNOWN	SYBR	None				0.968772	0.571387	1.64253	29.0181	29.4755	0.462159		8.67173	0.274339	0.0457713	TRUE	0.0561964	TRUE	1	40								78.685			N
102	E6	FALSE	CY D 13-55 U	ALK	UNKNOWN	SYBR	None				4.63456	3.53796	6.07105	26.6924	26.8801	0.241006		6.41353	0.140292	-2.21243	TRUE	0.0561964	TRUE	1	40								78.685			N
103	E7	FALSE	CY L 13-125 T	ALK	UNKNOWN	SYBR	None				0.17046	0.0391834	0.741551	31.9196	32.585	0.941074		11.1785	0.666505	2.5525	TRUE	0.0561964	TRUE	1	40								78.685			N
104	E8	FALSE	CY D 13-55 T	ALK	UNKNOWN	SYBR	None				13.0902	9.78089	17.5192	26.131	25.9562	0.212175		4.91555	0.151434	-3.71041	TRUE	0.0561964	TRUE	1	40								78.685			N
105	E9	FALSE	CY L 13-124 U	ALK	UNKNOWN	SYBR	None				0.581469	0.266171	1.27026	30.9554	30.1677	0.682324		9.40819	0.40604	0.782225	TRUE	0.0561964	TRUE	1	40								78.5509			N
106	E10	FALSE	CY D 11-29 U	ALK	UNKNOWN	SYBR	None				5.70548	4.29218	7.58416	27.7668	27.8038	0.102761		6.11361	0.147901	-2.51235	TRUE	0.0561964	TRUE	1	40								78.685			N
107	E11	FALSE	CY L 13-124 T	ALK	UNKNOWN	SYBR	None							Undetermined	32.6849	0.23555					TRUE	0.0561964	TRUE	1	40								84.4487	61.9301	79.3552	Y
108	E12	FALSE	CY D 11-29 T	ALK	UNKNOWN	SYBR	None				1.48506	0.82408	2.6762	31.4714	30.8772	0.519492		8.05544	0.306026	-0.57052	TRUE	0.0561964	TRUE	1	40								78.685			N
109	E13	FALSE	CY L 11-38 U	ALK	UNKNOWN	SYBR	None				7.02682	5.1985	9.49817	26.9743	26.9287	0.187909		5.81309	0.156595	-2.81287	TRUE	0.0561964	TRUE	1	40								78.685			N
110	E14	FALSE	CY D 11-18 U	ALK	UNKNOWN	SYBR	None				2.2535	1.67011	3.04067	28.6345	28.367	0.248856		7.45379	0.155675	-1.17217	TRUE	0.0561964	TRUE	1	40								78.5509			N
111	E15	FALSE	CY L 11-38 T	ALK	UNKNOWN	SYBR	None				0.0719275	0.0466774	0.110837	33.3153	33.5579	0.362585		12.4233	0.224683	3.79731	TRUE	0.0561964	TRUE	1	40								78.5509			N
112	E16	FALSE	CY D 11-18 T	ALK	UNKNOWN	SYBR	None				12.1007	8.29972	17.6423	26.4263	26.6254	0.300693		5.02895	0.195917	-3.59702	TRUE	0.0561964	TRUE	1	40								78.5509			N
113	E17	FALSE	CY B 13-68 U	ALK	UNKNOWN	SYBR	None				30.852	19.2974	49.3253	24.4885	24.8303	0.296085		3.67867	0.243824	-4.94729	TRUE	0.0561964	TRUE	1	40								78.4169			N
114	E18	FALSE	CY A 11-16 U	ALK	UNKNOWN	SYBR	None				0.577095	0.435099	0.765433	30.3449	30.3894	0.0386619		9.41908	0.146758	0.793118	TRUE	0.0561964	TRUE	1	40								78.5509			N
115	E19	FALSE	CY B 13-68 T	ALK	UNKNOWN	SYBR	None				0.379058	0.244385	0.587945	32.131	31.7968	0.393014		10.0255	0.228084	1.39951	TRUE	0.0561964	TRUE	1	40								78.5509			N
116	E20	FALSE	CY A 11-16 T	ALK	UNKNOWN	SYBR	None				0.0916242	0.0435481	0.192775	33.4905	33.4115	0.627605		12.0741	0.386509	3.44813	TRUE	0.0561964	TRUE	1	40								78.5509			N
117	E21	FALSE	CY B 12-40 U	ALK	UNKNOWN	SYBR	None				35.2075	18.6868	66.3338	25.375	25.7704	0.419374		3.48815	0.329148	-5.13781	TRUE	0.0561964	TRUE	1	40								78.5509			N
118	E22	FALSE	CY A 11-14 U	ALK	UNKNOWN	SYBR	None				2.76797	1.31717	5.81672	28.2494	28.5698	0.653576		7.15714	0.385882	-1.46883	TRUE	0.0561964	TRUE	1	40								78.5509			N
119	E23	FALSE	CY B 12-40 T	ALK	UNKNOWN	SYBR	None				15.7099	9.5785	25.7662	26.6852	26.6814	0.379821		4.65236	0.257093	-3.9736	TRUE	0.0561964	TRUE	1	40								78.5509			N
120	E24	FALSE	CY A 11-14 T	ALK	UNKNOWN	SYBR	None				0.23903	0.0945887	0.604039	31.9616	32.1275	0.831321		10.6907	0.481714	2.06474	TRUE	0.0561964	TRUE	1	40								78.4169			N
121	F1	FALSE	CY L 13-126 U	ALK	UNKNOWN	SYBR	None				1	0.41379	2.41669	29.7745	29.48	0.663291		8.62596	0.458511	0	TRUE	0.0561964	TRUE	1	40								78.5509			N
122	F2	FALSE	CY L 11-30 U	ALK	UNKNOWN	SYBR	None				8.08455	3.55669	18.3766	26.9408	26.8531	0.308749		5.6108	0.426673	-3.01517	TRUE	0.0561964	TRUE	1	40								78.5509			N
123	F3	FALSE	CY L 13-126 T	ALK	UNKNOWN	SYBR	None				0.544693	0.130806	2.26817	31.2396	29.7719	1.27272		9.50245	0.74124	0.876486	TRUE	0.0561964	TRUE	1	40								78.685			N
124	F4	FALSE	CY L 11-30 T	ALK	UNKNOWN	SYBR	None				0.0459956	0.0182344	0.116022	33.7127	33.4721	0.507171		13.0683	0.480771	4.44236	TRUE	0.0561964	TRUE	1	40								78.5509	73.3234		Y
125	F5	FALSE	CY L 13-125 U	ALK	UNKNOWN	SYBR	None				0.968772	0.571387	1.64253	29.9423	29.4755	0.462159		8.67173	0.274339	0.0457713	TRUE	0.0561964	TRUE	1	40								78.685			N
126	F6	FALSE	CY D 13-55 U	ALK	UNKNOWN	SYBR	None				4.63456	3.53796	6.07105	27.1519	26.8801	0.241006		6.41353	0.140292	-2.21243	TRUE	0.0561964	TRUE	1	40								78.5509			N
127	F7	FALSE	CY L 13-125 T	ALK	UNKNOWN	SYBR	None				0.17046	0.0391834	0.741551	33.2505	32.585	0.941074		11.1785	0.666505	2.5525	TRUE	0.0561964	TRUE	1	40								78.819			N
128	F8	FALSE	CY D 13-55 T	ALK	UNKNOWN	SYBR	None				13.0902	9.78089	17.5192	26.0175	25.9562	0.212175		4.91555	0.151434	-3.71041	TRUE	0.0561964	TRUE	1	40								78.685			N
129	F9	FALSE	CY L 13-124 U	ALK	UNKNOWN	SYBR	None				0.581469	0.266171	1.27026	29.7616	30.1677	0.682324		9.40819	0.40604	0.782225	TRUE	0.0561964	TRUE	1	40								78.5509			N
130	F10	FALSE	CY D 11-29 U	ALK	UNKNOWN	SYBR	None				5.70548	4.29218	7.58416	27.7246	27.8038	0.102761		6.11361	0.147901	-2.51235	TRUE	0.0561964	TRUE	1	40								78.685			N
131	F11	FALSE	CY L 13-124 T	ALK	UNKNOWN	SYBR	None				0.122757	0.0703973	0.21406	32.8514	32.6849	0.23555		11.6521	0.252074	3.02612	TRUE	0.0561964	TRUE	1	40								78.685			N
132	F12	FALSE	CY D 11-29 T	ALK	UNKNOWN	SYBR	None				1.48506	0.82408	2.6762	30.5093	30.8772	0.519492		8.05544	0.306026	-0.57052	TRUE	0.0561964	TRUE	1	40								78.5509			N
133	F13	FALSE	CY L 11-38 U	ALK	UNKNOWN	SYBR	None				7.02682	5.1985	9.49817	27.0896	26.9287	0.187909		5.81309	0.156595	-2.81287	TRUE	0.0561964	TRUE	1	40								78.5509			N
134	F14	FALSE	CY D 11-18 U	ALK	UNKNOWN	SYBR	None				2.2535	1.67011	3.04067	28.1424	28.367	0.248856		7.45379	0.155675	-1.17217	TRUE	0.0561964	TRUE	1	40								78.5509			N
135	F15	FALSE	CY L 11-38 T	ALK	UNKNOWN	SYBR	None				0.0719275	0.0466774	0.110837	33.9747	33.5579	0.362585		12.4233	0.224683	3.79731	TRUE	0.0561964	TRUE	1	40								78.5509	73.3234		Y
136	F16	FALSE	CY D 11-18 T	ALK	UNKNOWN	SYBR	None				12.1007	8.29972	17.6423	26.9713	26.6254	0.300693		5.02895	0.195917	-3.59702	TRUE	0.0561964	TRUE	1	40								78.5509			N
137	F17	FALSE	CY B 13-68 U	ALK	UNKNOWN	SYBR	None				30.852	19.2974	49.3253	25.0079	24.8303	0.296085		3.67867	0.243824	-4.94729	TRUE	0.0561964	TRUE	1	40								78.5509			N
138	F18	FALSE	CY A 11-16 U	ALK	UNKNOWN	SYBR	None				0.577095	0.435099	0.765433	30.4148	30.3894	0.0386619		9.41908	0.146758	0.793118	TRUE	0.0561964	TRUE	1	40								78.5509			N
139	F19	FALSE	CY B 13-68 T	ALK	UNKNOWN	SYBR	None				0.379058	0.244385	0.587945	31.3638	31.7968	0.393014		10.0255	0.228084	1.39951	TRUE	0.0561964	TRUE	1	40								78.5509			N
140	F20	FALSE	CY A 11-16 T	ALK	UNKNOWN	SYBR	None				0.0916242	0.0435481	0.192775	33.9959	33.4115	0.627605		12.0741	0.386509	3.44813	TRUE	0.0561964	TRUE	1	40								78.5509			N
141	F21	FALSE	CY B 12-40 U	ALK	UNKNOWN	SYBR	None				35.2075	18.6868	66.3338	25.7261	25.7704	0.419374		3.48815	0.329148	-5.13781	TRUE	0.0561964	TRUE	1	40								78.5509			N
142	F22	FALSE	CY A 11-14 U	ALK	UNKNOWN	SYBR	None				2.76797	1.31717	5.81672	29.3218	28.5698	0.653576		7.15714	0.385882	-1.46883	TRUE	0.0561964	TRUE	1	40								78.5509			N
143	F23	FALSE	CY B 12-40 T	ALK	UNKNOWN	SYBR	None				15.7099	9.5785	25.7662	26.2997	26.6814	0.379821		4.65236	0.257093	-3.9736	TRUE	0.0561964	TRUE	1	40								78.4169			N
144	F24	FALSE	CY A 11-14 T	ALK	UNKNOWN	SYBR	None				0.23903	0.0945887	0.604039	33.0293	32.1275	0.831321		10.6907	0.481714	2.06474	TRUE	0.0561964	TRUE	1	40								78.5509			N
145	G1	FALSE	CY L 13-126 U	BRCA1	UNKNOWN	SYBR	None				1	0.530035	1.88667	25.9003	25.5199	0.368351		4.66584	0.329861	0	TRUE	0.04	TRUE	1	40								78.819			N
146	G2	FALSE	CY L 11-30 U	BRCA1	UNKNOWN	SYBR	None				1.22236	0.575261	2.59738	25.6831	25.6185	0.0966367		4.37617	0.391647	-0.289675	TRUE	0.04	TRUE	1	40								78.819			N
147	G3	FALSE	CY L 13-126 T	BRCA1	UNKNOWN	SYBR	None				1.37304	0.765316	2.46334	23.9182	24.4779	0.498217		4.20847	0.303714	-0.457372	TRUE	0.04	TRUE	1	40								78.819			N
148	G4	FALSE	CY L 11-30 T	BRCA1	UNKNOWN	SYBR	None				2.35726	1.07912	5.14928	23.9648	23.8325	0.241511		3.42873	0.406007	-1.23711	TRUE	0.04	TRUE	1	40								78.685			N
149	G5	FALSE	CY L 13-125 U	BRCA1	UNKNOWN	SYBR	None				0.92146	0.622531	1.36393	25.8105	25.5876	0.33523		4.78385	0.203777	0.118006	TRUE	0.04	TRUE	1	40								78.819	73.0553		Y
150	G6	FALSE	CY D 13-55 U	BRCA1	UNKNOWN	SYBR	None				0.967534	0.723228	1.29437	25.2219	25.18	0.260083		4.71346	0.151223	0.0476151	TRUE	0.04	TRUE	1	40								78.685			N
151	G7	FALSE	CY L 13-125 T	BRCA1	UNKNOWN	SYBR	None				2.22813	2.03037	2.44514	24.8676	24.9166	0.0523536		3.51001	0.048295	-1.15583	TRUE	0.04	TRUE	1	40								78.819			N
152	G8	FALSE	CY D 13-55 T	BRCA1	UNKNOWN	SYBR	None				3.09817	2.52099	3.80749	23.963	24.0751	0.103193		3.03443	0.107125	-1.63141	TRUE	0.04	TRUE	1	40								78.685			N
153	G9	FALSE	CY L 13-124 U	BRCA1	UNKNOWN	SYBR	None				0.911739	0.540524	1.53789	25.3777	25.5586	0.438595		4.79915	0.271665	0.133308	TRUE	0.04	TRUE	1	40								78.685			N
154	G10	FALSE	CY D 11-29 U	BRCA1	UNKNOWN	SYBR	None				1.91557	1.28233	2.86153	25.2864	25.4182	0.274604		3.72806	0.208544	-0.937775	TRUE	0.04	TRUE	1	40								78.819			N
155	G11	FALSE	CY L 13-124 T	BRCA1	UNKNOWN	SYBR	None				0.547151	0.355686	0.841679	26.3298	26.5686	0.206987		5.53583	0.223787	0.86999	TRUE	0.04	TRUE	1	40								78.685			N
156	G12	FALSE	CY D 11-29 T	BRCA1	UNKNOWN	SYBR	None				2.13928	1.20034	3.81268	25.8052	26.3904	0.509313		3.56871	0.300268	-1.09713	TRUE	0.04	TRUE	1	40								78.685			N
157	G13	FALSE	CY L 11-38 U	BRCA1	UNKNOWN	SYBR	None				0.805511	0.587592	1.10425	25.8706	26.0935	0.205778		4.97786	0.163911	0.312023	TRUE	0.04	TRUE	1	40								78.685			N
158	G14	FALSE	CY D 11-18 U	BRCA1	UNKNOWN	SYBR	None				0.683151	0.50991	0.915249	26.1738	26.1288	0.241904		5.21556	0.151979	0.549724	TRUE	0.04	TRUE	1	40								78.685			N
159	G15	FALSE	CY L 11-38 T	BRCA1	UNKNOWN	SYBR	None				0.402117	0.241671	0.669085	26.9574	27.1147	0.43591		5.98015	0.264573	1.31431	TRUE	0.04	TRUE	1	40								78.5509			N
160	G16	FALSE	CY D 11-18 T	BRCA1	UNKNOWN	SYBR	None				4.05003	3.3386	4.91306	24.1834	24.2444	0.0741083		2.64791	0.100376	-2.01793	TRUE	0.04	TRUE	1	40								78.685			N
161	G17	FALSE	CY B 13-68 U	BRCA1	UNKNOWN	SYBR	None				0.560469	0.315539	0.995521	26.9041	26.6528	0.420302		5.50113	0.298517	0.835293	TRUE	0.04	TRUE	1	40								78.685			N
162	G18	FALSE	CY A 11-16 U	BRCA1	UNKNOWN	SYBR	None				0.738134	0.502714	1.0838	25.8634	26.0742	0.23746		5.10389	0.199588	0.438046	TRUE	0.04	TRUE	1	40								78.685			N
163	G19	FALSE	CY B 13-68 T	BRCA1	UNKNOWN	SYBR	None				0.812379	0.720791	0.915604	26.7879	26.7369	0.0999161		4.96562	0.0621556	0.299775	TRUE	0.04	TRUE	1	40								78.685			N
164	G20	FALSE	CY A 11-16 T	BRCA1	UNKNOWN	SYBR	None				0.900612	0.547739	1.48082	26.5955	26.1543	0.382131		4.81686	0.258394	0.151022	TRUE	0.04	TRUE	1	40								78.685			N
165	G21	FALSE	CY B 12-40 U	BRCA1	UNKNOWN	SYBR	None				3.29976	2.03982	5.33794	25.3469	25.2258	0.195593		2.94348	0.249931	-1.72236	TRUE	0.04	TRUE	1	40								78.685			N
166	G22	FALSE	CY A 11-14 U	BRCA1	UNKNOWN	SYBR	None				0.838638	0.643729	1.09256	26.5069	26.3324	0.192656		4.91972	0.13744	0.25388	TRUE	0.04	TRUE	1	40								78.685			N
167	G23	FALSE	CY B 12-40 T	BRCA1	UNKNOWN	SYBR	None				2.12343	1.55867	2.89283	25.6619	25.6085	0.15302		3.57944	0.160666	-1.0864	TRUE	0.04	TRUE	1	40								78.685			N
168	G24	FALSE	CY A 11-14 T	BRCA1	UNKNOWN	SYBR	None				2.4192	1.32287	4.42411	24.5478	24.8281	0.538605		3.39131	0.313659	-1.27453	TRUE	0.04	TRUE	1	40								78.685			N
169	H1	FALSE	CY L 13-126 U	BRCA1	UNKNOWN	SYBR	None				1	0.530035	1.88667	25.1649	25.5199	0.368351		4.66584	0.329861	0	TRUE	0.04	TRUE	1	40								78.819			N
170	H2	FALSE	CY L 11-30 U	BRCA1	UNKNOWN	SYBR	None				1.22236	0.575261	2.59738	25.6649	25.6185	0.0966367		4.37617	0.391647	-0.289675	TRUE	0.04	TRUE	1	40								78.819			N
171	H3	FALSE	CY L 13-126 T	BRCA1	UNKNOWN	SYBR	None				1.37304	0.765316	2.46334	24.6428	24.4779	0.498217		4.20847	0.303714	-0.457372	TRUE	0.04	TRUE	1	40								78.819			N
172	H4	FALSE	CY L 11-30 T	BRCA1	UNKNOWN	SYBR	None				2.35726	1.07912	5.14928	23.9789	23.8325	0.241511		3.42873	0.406007	-1.23711	TRUE	0.04	TRUE	1	40								78.819			N
173	H5	FALSE	CY L 13-125 U	BRCA1	UNKNOWN	SYBR	None				0.92146	0.622531	1.36393	25.7503	25.5876	0.33523		4.78385	0.203777	0.118006	TRUE	0.04	TRUE	1	40								78.685			N
174	H6	FALSE	CY D 13-55 U	BRCA1	UNKNOWN	SYBR	None				0.967534	0.723228	1.29437	24.9016	25.18	0.260083		4.71346	0.151223	0.0476151	TRUE	0.04	TRUE	1	40								78.685			N
175	H7	FALSE	CY L 13-125 T	BRCA1	UNKNOWN	SYBR	None				2.22813	2.03037	2.44514	24.9718	24.9166	0.0523536		3.51001	0.048295	-1.15583	TRUE	0.04	TRUE	1	40								78.685			N
176	H8	FALSE	CY D 13-55 T	BRCA1	UNKNOWN	SYBR	None				3.09817	2.52099	3.80749	24.0961	24.0751	0.103193		3.03443	0.107125	-1.63141	TRUE	0.04	TRUE	1	40								78.685			N
177	H9	FALSE	CY L 13-124 U	BRCA1	UNKNOWN	SYBR	None				0.911739	0.540524	1.53789	25.2394	25.5586	0.438595		4.79915	0.271665	0.133308	TRUE	0.04	TRUE	1	40								78.685			N
178	H10	FALSE	CY D 11-29 U	BRCA1	UNKNOWN	SYBR	None				1.91557	1.28233	2.86153	25.7339	25.4182	0.274604		3.72806	0.208544	-0.937775	TRUE	0.04	TRUE	1	40								78.819			N
179	H11	FALSE	CY L 13-124 T	BRCA1	UNKNOWN	SYBR	None				0.547151	0.355686	0.841679	26.6956	26.5686	0.206987		5.53583	0.223787	0.86999	TRUE	0.04	TRUE	1	40								78.685			N
180	H12	FALSE	CY D 11-29 T	BRCA1	UNKNOWN	SYBR	None				2.13928	1.20034	3.81268	26.633	26.3904	0.509313		3.56871	0.300268	-1.09713	TRUE	0.04	TRUE	1	40								78.685			N
181	H13	FALSE	CY L 11-38 U	BRCA1	UNKNOWN	SYBR	None				0.805511	0.587592	1.10425	26.1337	26.0935	0.205778		4.97786	0.163911	0.312023	TRUE	0.04	TRUE	1	40								78.819			N
182	H14	FALSE	CY D 11-18 U	BRCA1	UNKNOWN	SYBR	None				0.683151	0.50991	0.915249	26.345	26.1288	0.241904		5.21556	0.151979	0.549724	TRUE	0.04	TRUE	1	40								78.685			N
183	H15	FALSE	CY L 11-38 T	BRCA1	UNKNOWN	SYBR	None				0.402117	0.241671	0.669085	26.7794	27.1147	0.43591		5.98015	0.264573	1.31431	TRUE	0.04	TRUE	1	40								78.685			N
184	H16	FALSE	CY D 11-18 T	BRCA1	UNKNOWN	SYBR	None				4.05003	3.3386	4.91306	24.2229	24.2444	0.0741083		2.64791	0.100376	-2.01793	TRUE	0.04	TRUE	1	40								78.685			N
185	H17	FALSE	CY B 13-68 U	BRCA1	UNKNOWN	SYBR	None				0.560469	0.315539	0.995521	26.8867	26.6528	0.420302		5.50113	0.298517	0.835293	TRUE	0.04	TRUE	1	40								78.685			N
186	H18	FALSE	CY A 11-16 U	BRCA1	UNKNOWN	SYBR	None				0.738134	0.502714	1.0838	26.0278	26.0742	0.23746		5.10389	0.199588	0.438046	TRUE	0.04	TRUE	1	40								78.685			N
187	H19	FALSE	CY B 13-68 T	BRCA1	UNKNOWN	SYBR	None				0.812379	0.720791	0.915604	26.6218	26.7369	0.0999161		4.96562	0.0621556	0.299775	TRUE	0.04	TRUE	1	40								78.685			N
188	H20	FALSE	CY A 11-16 T	BRCA1	UNKNOWN	SYBR	None				0.900612	0.547739	1.48082	25.9298	26.1543	0.382131		4.81686	0.258394	0.151022	TRUE	0.04	TRUE	1	40								78.685			N
189	H21	FALSE	CY B 12-40 U	BRCA1	UNKNOWN	SYBR	None				3.29976	2.03982	5.33794	25.3303	25.2258	0.195593		2.94348	0.249931	-1.72236	TRUE	0.04	TRUE	1	40								78.685			N
190	H22	FALSE	CY A 11-14 U	BRCA1	UNKNOWN	SYBR	None				0.838638	0.643729	1.09256	26.1257	26.3324	0.192656		4.91972	0.13744	0.25388	TRUE	0.04	TRUE	1	40								78.685			N
191	H23	FALSE	CY B 12-40 T	BRCA1	UNKNOWN	SYBR	None				2.12343	1.55867	2.89283	25.436	25.6085	0.15302		3.57944	0.160666	-1.0864	TRUE	0.04	TRUE	1	40								78.819			N
192	H24	FALSE	CY A 11-14 T	BRCA1	UNKNOWN	SYBR	None				2.4192	1.32287	4.42411	24.4874	24.8281	0.538605		3.39131	0.313659	-1.27453	TRUE	0.04	TRUE	1	40								78.685			N
193	I1	FALSE	CY L 13-126 U	BRCA1	UNKNOWN	SYBR	None				1	0.530035	1.88667	25.4944	25.5199	0.368351		4.66584	0.329861	0	TRUE	0.04	TRUE	1	40								78.685			N
194	I2	FALSE	CY L 11-30 U	BRCA1	UNKNOWN	SYBR	None				1.22236	0.575261	2.59738	25.5074	25.6185	0.0966367		4.37617	0.391647	-0.289675	TRUE	0.04	TRUE	1	40								78.685			N
195	I3	FALSE	CY L 13-126 T	BRCA1	UNKNOWN	SYBR	None				1.37304	0.765316	2.46334	24.8728	24.4779	0.498217		4.20847	0.303714	-0.457372	TRUE	0.04	TRUE	1	40								78.819			N
196	I4	FALSE	CY L 11-30 T	BRCA1	UNKNOWN	SYBR	None				2.35726	1.07912	5.14928	23.5537	23.8325	0.241511		3.42873	0.406007	-1.23711	TRUE	0.04	TRUE	1	40								78.685			N
197	I5	FALSE	CY L 13-125 U	BRCA1	UNKNOWN	SYBR	None				0.92146	0.622531	1.36393	25.2021	25.5876	0.33523		4.78385	0.203777	0.118006	TRUE	0.04	TRUE	1	40								78.685			N
198	I6	FALSE	CY D 13-55 U	BRCA1	UNKNOWN	SYBR	None				0.967534	0.723228	1.29437	25.4166	25.18	0.260083		4.71346	0.151223	0.0476151	TRUE	0.04	TRUE	1	40								78.5509	91.0166		Y
199	I7	FALSE	CY L 13-125 T	BRCA1	UNKNOWN	SYBR	None				2.22813	2.03037	2.44514	24.9104	24.9166	0.0523536		3.51001	0.048295	-1.15583	TRUE	0.04	TRUE	1	40								78.819			N
200	I8	FALSE	CY D 13-55 T	BRCA1	UNKNOWN	SYBR	None				3.09817	2.52099	3.80749	24.1661	24.0751	0.103193		3.03443	0.107125	-1.63141	TRUE	0.04	TRUE	1	40								78.685			N
201	I9	FALSE	CY L 13-124 U	BRCA1	UNKNOWN	SYBR	None				0.911739	0.540524	1.53789	26.0587	25.5586	0.438595		4.79915	0.271665	0.133308	TRUE	0.04	TRUE	1	40								78.5509			N
202	I10	FALSE	CY D 11-29 U	BRCA1	UNKNOWN	SYBR	None				1.91557	1.28233	2.86153	25.2343	25.4182	0.274604		3.72806	0.208544	-0.937775	TRUE	0.04	TRUE	1	40								78.685			N
203	I11	FALSE	CY L 13-124 T	BRCA1	UNKNOWN	SYBR	None				0.547151	0.355686	0.841679	26.6804	26.5686	0.206987		5.53583	0.223787	0.86999	TRUE	0.04	TRUE	1	40								78.685			N
204	I12	FALSE	CY D 11-29 T	BRCA1	UNKNOWN	SYBR	None				2.13928	1.20034	3.81268	26.7331	26.3904	0.509313		3.56871	0.300268	-1.09713	TRUE	0.04	TRUE	1	40								78.685			N
205	I13	FALSE	CY L 11-38 U	BRCA1	UNKNOWN	SYBR	None				0.805511	0.587592	1.10425	26.2762	26.0935	0.205778		4.97786	0.163911	0.312023	TRUE	0.04	TRUE	1	40								78.5509			N
206	I14	FALSE	CY D 11-18 U	BRCA1	UNKNOWN	SYBR	None				0.683151	0.50991	0.915249	25.8675	26.1288	0.241904		5.21556	0.151979	0.549724	TRUE	0.04	TRUE	1	40								78.685			N
207	I15	FALSE	CY L 11-38 T	BRCA1	UNKNOWN	SYBR	None				0.402117	0.241671	0.669085	27.6075	27.1147	0.43591		5.98015	0.264573	1.31431	TRUE	0.04	TRUE	1	40								78.5509			N
208	I16	FALSE	CY D 11-18 T	BRCA1	UNKNOWN	SYBR	None				4.05003	3.3386	4.91306	24.3269	24.2444	0.0741083		2.64791	0.100376	-2.01793	TRUE	0.04	TRUE	1	40								78.2829			N
209	I17	FALSE	CY B 13-68 U	BRCA1	UNKNOWN	SYBR	None				0.560469	0.315539	0.995521	26.1676	26.6528	0.420302		5.50113	0.298517	0.835293	TRUE	0.04	TRUE	1	40								78.685			N
210	I18	FALSE	CY A 11-16 U	BRCA1	UNKNOWN	SYBR	None				0.738134	0.502714	1.0838	26.3315	26.0742	0.23746		5.10389	0.199588	0.438046	TRUE	0.04	TRUE	1	40								78.685			N
211	I19	FALSE	CY B 13-68 T	BRCA1	UNKNOWN	SYBR	None				0.812379	0.720791	0.915604	26.8011	26.7369	0.0999161		4.96562	0.0621556	0.299775	TRUE	0.04	TRUE	1	40								78.685			N
212	I20	FALSE	CY A 11-16 T	BRCA1	UNKNOWN	SYBR	None				0.900612	0.547739	1.48082	25.9375	26.1543	0.382131		4.81686	0.258394	0.151022	TRUE	0.04	TRUE	1	40								78.5509			N
213	I21	FALSE	CY B 12-40 U	BRCA1	UNKNOWN	SYBR	None				3.29976	2.03982	5.33794	25.0001	25.2258	0.195593		2.94348	0.249931	-1.72236	TRUE	0.04	TRUE	1	40								78.685			N
214	I22	FALSE	CY A 11-14 U	BRCA1	UNKNOWN	SYBR	None				0.838638	0.643729	1.09256	26.3646	26.3324	0.192656		4.91972	0.13744	0.25388	TRUE	0.04	TRUE	1	40								78.685			N
215	I23	FALSE	CY B 12-40 T	BRCA1	UNKNOWN	SYBR	None				2.12343	1.55867	2.89283	25.7277	25.6085	0.15302		3.57944	0.160666	-1.0864	TRUE	0.04	TRUE	1	40								78.685			N
216	I24	FALSE	CY A 11-14 T	BRCA1	UNKNOWN	SYBR	None				2.4192	1.32287	4.42411	25.4491	24.8281	0.538605		3.39131	0.313659	-1.27453	TRUE	0.04	TRUE	1	40								78.685			N
217	J1	FALSE	CY L 13-126 U	PDCD1	UNKNOWN	SYBR	None							Undetermined							TRUE	0.04	TRUE	1	40								83.7785	61.2599		Y
218	J2	FALSE	CY L 11-30 U	PDCD1	UNKNOWN	SYBR	None							Undetermined							TRUE	0.04	TRUE	1	40								83.9125	90.4804	61.1259	Y
219	J3	FALSE	CY L 13-126 T	PDCD1	UNKNOWN	SYBR	None							31.1011	30.88	0.526434		10.6105	0.319186		TRUE	0.04	TRUE	1	40								61.9301	83.9125		Y
220	J4	FALSE	CY L 11-30 T	PDCD1	UNKNOWN	SYBR	None							39.1622	25.3346	19.5552		4.93087	13.8329		TRUE	0.04	TRUE	1	40								84.4487	61.528		Y
221	J5	FALSE	CY L 13-125 U	PDCD1	UNKNOWN	SYBR	None							Undetermined							TRUE	0.04	TRUE	1	40								84.4487	90.6145	61.3939	Y
222	J6	FALSE	CY D 13-55 U	PDCD1	UNKNOWN	SYBR	None							31.1173	31.4532	0.290864		10.9866	0.168883		TRUE	0.04	TRUE	1	40								84.4487			N
223	J7	FALSE	CY L 13-125 T	PDCD1	UNKNOWN	SYBR	None							Undetermined							TRUE	0.04	TRUE	1	40								61.3939	90.8825	83.9125	Y
224	J8	FALSE	CY D 13-55 T	PDCD1	UNKNOWN	SYBR	None							30.7048	30.7711	0.470219		9.73044	0.285706		TRUE	0.04	TRUE	1	40								84.3146			N
225	J9	FALSE	CY L 13-124 U	PDCD1	UNKNOWN	SYBR	None							Undetermined	37.2934						TRUE	0.04	TRUE	1	40								84.3146	61.2599		Y
226	J10	FALSE	CY D 11-29 U	PDCD1	UNKNOWN	SYBR	None							Undetermined							TRUE	0.04	TRUE	1	40								61.3939			N
227	J11	FALSE	CY L 13-124 T	PDCD1	UNKNOWN	SYBR	None							11.1478	8.78696	3.33878		-12.2458	2.36845		TRUE	0.04	TRUE	1	40								83.9125	61.3939		Y
228	J12	FALSE	CY D 11-29 T	PDCD1	UNKNOWN	SYBR	None							Undetermined							TRUE	0.04	TRUE	1	40								84.0465	90.7485	61.1259	Y
229	J13	FALSE	CY L 11-38 U	PDCD1	UNKNOWN	SYBR	None							Undetermined	7.92584						TRUE	0.04	TRUE	1	40								84.0465	61.3939		Y
230	J14	FALSE	CY D 11-18 U	PDCD1	UNKNOWN	SYBR	None							33.8016	33.9156	0.621707		13.0025	0.363911		TRUE	0.04	TRUE	1	40								84.3146			N
231	J15	FALSE	CY L 11-38 T	PDCD1	UNKNOWN	SYBR	None							Undetermined	15.1648						TRUE	0.04	TRUE	1	40								84.3146	61.1259		Y
232	J16	FALSE	CY D 11-18 T	PDCD1	UNKNOWN	SYBR	None							31.3218	31.114	0.264106		9.51751	0.177469		TRUE	0.04	TRUE	1	40								84.3146			N
233	J17	FALSE	CY B 13-68 U	PDCD1	UNKNOWN	SYBR	None							34.1975	34.5475	0.337457		13.3958	0.261126		TRUE	0.04	TRUE	1	40								84.1806	67.5597		Y
234	J18	FALSE	CY A 11-16 U	PDCD1	UNKNOWN	SYBR	None							Undetermined							TRUE	0.04	TRUE	1	40								84.1806	61.662		Y
235	J19	FALSE	CY B 13-68 T	PDCD1	UNKNOWN	SYBR	None							Undetermined	26.9194	14.9056					TRUE	0.04	TRUE	1	40								90.8825	84.0465	61.528	Y
236	J20	FALSE	CY A 11-16 T	PDCD1	UNKNOWN	SYBR	None							Undetermined							TRUE	0.04	TRUE	1	40								84.1806	61.1259		Y
237	J21	FALSE	CY B 12-40 U	PDCD1	UNKNOWN	SYBR	None							30.5565	31.2596	0.702522		8.97729	0.462845		TRUE	0.04	TRUE	1	40								84.4487			N
238	J22	FALSE	CY A 11-14 U	PDCD1	UNKNOWN	SYBR	None							Undetermined	9.18264	4.0315					TRUE	0.04	TRUE	1	40								84.1806	61.662		Y
239	J23	FALSE	CY B 12-40 T	PDCD1	UNKNOWN	SYBR	None							30.7227	30.7512	0.175391		8.72212	0.168115		TRUE	0.04	TRUE	1	40								84.3146			N
240	J24	FALSE	CY A 11-14 T	PDCD1	UNKNOWN	SYBR	None							12.777	12.777			-8.65983			TRUE	0.04	TRUE	1	40								80.5615	84.1806	61.662	Y
241	K1	FALSE	CY L 13-126 U	PDCD1	UNKNOWN	SYBR	None							Undetermined							TRUE	0.04	TRUE	1	40								84.3146	90.6145	61.2599	Y
242	K2	FALSE	CY L 11-30 U	PDCD1	UNKNOWN	SYBR	None							Undetermined							TRUE	0.04	TRUE	1	40								84.0465	61.3939		Y
243	K3	FALSE	CY L 13-126 T	PDCD1	UNKNOWN	SYBR	None							30.2791	30.88	0.526434		10.6105	0.319186		TRUE	0.04	TRUE	1	40								61.7961	90.8825	83.9125	Y
244	K4	FALSE	CY L 11-30 T	PDCD1	UNKNOWN	SYBR	None							Undetermined	25.3346	19.5552					TRUE	0.04	TRUE	1	40								83.3763	61.3939		Y
245	K5	FALSE	CY L 13-125 U	PDCD1	UNKNOWN	SYBR	None							Undetermined							TRUE	0.04	TRUE	1	40								83.5104	61.528	90.7485	Y
246	K6	FALSE	CY D 13-55 U	PDCD1	UNKNOWN	SYBR	None							31.6205	31.4532	0.290864		10.9866	0.168883		TRUE	0.04	TRUE	1	40								84.3146			N
247	K7	FALSE	CY L 13-125 T	PDCD1	UNKNOWN	SYBR	None							Undetermined							TRUE	0.04	TRUE	1	40								83.9125	91.0166	61.1259	Y
248	K8	FALSE	CY D 13-55 T	PDCD1	UNKNOWN	SYBR	None							31.2709	30.7711	0.470219		9.73044	0.285706		TRUE	0.04	TRUE	1	40								84.3146			N
249	K9	FALSE	CY L 13-124 U	PDCD1	UNKNOWN	SYBR	None							37.2934	37.2934			16.5339			TRUE	0.04	TRUE	1	40								80.2934	64.4768	84.1806	Y
250	K10	FALSE	CY D 11-29 U	PDCD1	UNKNOWN	SYBR	None							Undetermined							TRUE	0.04	TRUE	1	40								84.0465	90.8825	61.2599	Y
251	K11	FALSE	CY L 13-124 T	PDCD1	UNKNOWN	SYBR	None							Undetermined	8.78696	3.33878					TRUE	0.04	TRUE	1	40								83.3763	61.2599		Y
252	K12	FALSE	CY D 11-29 T	PDCD1	UNKNOWN	SYBR	None							Undetermined							TRUE	0.04	TRUE	1	40								82.7061			N
253	K13	FALSE	CY L 11-38 U	PDCD1	UNKNOWN	SYBR	None							Undetermined	7.92584						TRUE	0.04	TRUE	1	40								83.9125	61.2599	91.1506	Y
254	K14	FALSE	CY D 11-18 U	PDCD1	UNKNOWN	SYBR	None							33.3589	33.9156	0.621707		13.0025	0.363911		TRUE	0.04	TRUE	1	40								84.3146			N
255	K15	FALSE	CY L 11-38 T	PDCD1	UNKNOWN	SYBR	None							15.1648	15.1648			-5.96977			TRUE	0.04	TRUE	1	40								82.7061			N
256	K16	FALSE	CY D 11-18 T	PDCD1	UNKNOWN	SYBR	None							30.8168	31.114	0.264106		9.51751	0.177469		TRUE	0.04	TRUE	1	40								84.3146			N
257	K17	FALSE	CY B 13-68 U	PDCD1	UNKNOWN	SYBR	None							34.8709	34.5475	0.337457		13.3958	0.261126		TRUE	0.04	TRUE	1	40								84.3146			N
258	K18	FALSE	CY A 11-16 U	PDCD1	UNKNOWN	SYBR	None							Undetermined							TRUE	0.04	TRUE	1	40								84.1806	61.662		Y
259	K19	FALSE	CY B 13-68 T	PDCD1	UNKNOWN	SYBR	None							37.4592	26.9194	14.9056		5.14806	10.5399		TRUE	0.04	TRUE	1	40								83.6444	61.3939		Y
260	K20	FALSE	CY A 11-16 T	PDCD1	UNKNOWN	SYBR	None							Undetermined							TRUE	0.04	TRUE	1	40								84.1806	61.2599		Y
261	K21	FALSE	CY B 12-40 U	PDCD1	UNKNOWN	SYBR	None							31.9615	31.2596	0.702522		8.97729	0.462845		TRUE	0.04	TRUE	1	40								84.3146	69.1682		Y
262	K22	FALSE	CY A 11-14 U	PDCD1	UNKNOWN	SYBR	None							12.0333	9.18264	4.0315		-12.23	2.85185		TRUE	0.04	TRUE	1	40								84.3146	63.6726		Y
263	K23	FALSE	CY B 12-40 T	PDCD1	UNKNOWN	SYBR	None							30.5918	30.7512	0.175391		8.72212	0.168115		TRUE	0.04	TRUE	1	40								84.3146			N
264	K24	FALSE	CY A 11-14 T	PDCD1	UNKNOWN	SYBR	None							Undetermined	12.777						TRUE	0.04	TRUE	1	40								83.6444	61.528		Y
265	L1	FALSE	CY L 13-126 U	PDCD1	UNKNOWN	SYBR	None							Undetermined							TRUE	0.04	TRUE	1	40								83.6444	61.2599	91.1506	Y
266	L2	FALSE	CY L 11-30 U	PDCD1	UNKNOWN	SYBR	None							Undetermined							TRUE	0.04	TRUE	1	40								83.7785	61.7961		Y
267	L3	FALSE	CY L 13-126 T	PDCD1	UNKNOWN	SYBR	None							31.2599	30.88	0.526434		10.6105	0.319186		TRUE	0.04	TRUE	1	40								61.7961			N
268	L4	FALSE	CY L 11-30 T	PDCD1	UNKNOWN	SYBR	None							11.507	25.3346	19.5552		4.93087	13.8329		TRUE	0.04	TRUE	1	40								80.4275	61.7961	90.4804	Y
269	L5	FALSE	CY L 13-125 U	PDCD1	UNKNOWN	SYBR	None							Undetermined							TRUE	0.04	TRUE	1	40								84.1806	61.3939	78.4169	Y
270	L6	FALSE	CY D 13-55 U	PDCD1	UNKNOWN	SYBR	None							31.6217	31.4532	0.290864		10.9866	0.168883		TRUE	0.04	TRUE	1	40								84.3146	70.6426		Y
271	L7	FALSE	CY L 13-125 T	PDCD1	UNKNOWN	SYBR	None							Undetermined							TRUE	0.04	TRUE	1	40								82.9742	61.1259	91.6868	Y
272	L8	FALSE	CY D 13-55 T	PDCD1	UNKNOWN	SYBR	None							30.3375	30.7711	0.470219		9.73044	0.285706		TRUE	0.04	TRUE	1	40								84.3146			N
273	L9	FALSE	CY L 13-124 U	PDCD1	UNKNOWN	SYBR	None							Undetermined	37.2934						TRUE	0.04	TRUE	1	40								90.8825	83.7785	61.3939	Y
274	L10	FALSE	CY D 11-29 U	PDCD1	UNKNOWN	SYBR	None							Undetermined							TRUE	0.04	TRUE	1	40								84.1806	90.6145	61.2599	Y
275	L11	FALSE	CY L 13-124 T	PDCD1	UNKNOWN	SYBR	None							6.42608	8.78696	3.33878		-12.2458	2.36845		TRUE	0.04	TRUE	1	40								84.1806	61.2599		Y
276	L12	FALSE	CY D 11-29 T	PDCD1	UNKNOWN	SYBR	None							Undetermined							TRUE	0.04	TRUE	1	40								84.0465	61.528	90.6145	Y
277	L13	FALSE	CY L 11-38 U	PDCD1	UNKNOWN	SYBR	None							7.92584	7.92584			-13.1898			TRUE	0.04	TRUE	1	40								83.7785	61.3939		Y
278	L14	FALSE	CY D 11-18 U	PDCD1	UNKNOWN	SYBR	None							34.5865	33.9156	0.621707		13.0025	0.363911		TRUE	0.04	TRUE	1	40								84.3146			N
279	L15	FALSE	CY L 11-38 T	PDCD1	UNKNOWN	SYBR	None							Undetermined	15.1648						TRUE	0.04	TRUE	1	40								84.0465	90.7485		Y
280	L16	FALSE	CY D 11-18 T	PDCD1	UNKNOWN	SYBR	None							31.2034	31.114	0.264106		9.51751	0.177469		TRUE	0.04	TRUE	1	40								84.1806	69.8384		Y
281	L17	FALSE	CY B 13-68 U	PDCD1	UNKNOWN	SYBR	None							34.5739	34.5475	0.337457		13.3958	0.261126		TRUE	0.04	TRUE	1	40								84.3146			N
282	L18	FALSE	CY A 11-16 U	PDCD1	UNKNOWN	SYBR	None							Undetermined							TRUE	0.04	TRUE	1	40								84.0465	61.528		Y
283	L19	FALSE	CY B 13-68 T	PDCD1	UNKNOWN	SYBR	None							16.3795	26.9194	14.9056		5.14806	10.5399		TRUE	0.04	TRUE	1	40								84.3146	90.6145	63.6726	Y
284	L20	FALSE	CY A 11-16 T	PDCD1	UNKNOWN	SYBR	None							Undetermined							TRUE	0.04	TRUE	1	40								83.9125	61.2599	90.3464	Y
285	L21	FALSE	CY B 12-40 U	PDCD1	UNKNOWN	SYBR	None							31.2607	31.2596	0.702522		8.97729	0.462845		TRUE	0.04	TRUE	1	40								84.3146			N
286	L22	FALSE	CY A 11-14 U	PDCD1	UNKNOWN	SYBR	None							6.33194	9.18264	4.0315		-12.23	2.85185		TRUE	0.04	TRUE	1	40								83.9125			N
287	L23	FALSE	CY B 12-40 T	PDCD1	UNKNOWN	SYBR	None							30.9391	30.7512	0.175391		8.72212	0.168115		TRUE	0.04	TRUE	1	40								84.3146			N
288	L24	FALSE	CY A 11-14 T	PDCD1	UNKNOWN	SYBR	None							Undetermined	12.777						TRUE	0.04	TRUE	1	40								83.5104			N
381	P21	FALSE		PDCD1	NTC	SYBR	None							Undetermined							TRUE	0.04	TRUE	1	40								61.3939			N
382	P22	FALSE		BRCA1	NTC	SYBR	None							Undetermined							TRUE	0.04	TRUE	1	40								61.2599			N
383	P23	FALSE		ALK	NTC	SYBR	None							Undetermined							TRUE	0.0561964	TRUE	1	40								61.1259			N
384	P24	FALSE		HMBS	NTC	SYBR	None							Undetermined							TRUE	0.142622	TRUE	1	40								62.0641			N
Analysis Type	Singleplex
Endogenous Control	HMBS
RQ Min/Max Confidence Level	95.0
Reference Sample	CY L 13-126 U

## Sheet: Sheet2
Well	Sample Name	Target	CT	Ct Mean	Ct SD	Δ Ct	Δ Ct Mean	Δ Ct SE	Δ Δ Ct			Sample Name	Target	CT	Ct Mean	Ct SD				Sample Name	Target	CT	Ct Mean	Ct SD	Δ Ct	Δ Ct Mean	Δ Ct SE	Δ Δ Ct untreated	FOLD	Δ Δ Ct Cisplatin	FOLD
A1	CY L 13-126 U	ALK	28.7205	29.48	0.663291	7.6286	8.62596	0.458511	0			CY L 13-126 U	HMBS	21.0918	20.854	0.43674				CY L 13-126 U	ALK	28.7205	29.48	0.663291	28.7205	8.62596	0.458511	0	1	0.876486	0.544693
A2	CY L 13-126 U	ALK	29.9451			9.59505						CY L 13-126 U	HMBS	20.35						CY L 13-125 U	ALK	29.4662	29.4755	0.462159	29.4662	8.67173	0.274339	0.0457713	0.968772	2.5525	0.17046
A3	CY L 13-126 U	ALK	29.7745			8.65423						CY L 13-126 U	HMBS	21.1203						CY L 13-124 U	ALK	29.7859	30.1677	0.682324	29.7859	9.40819	0.40604	0.782225	0.581469	3.02612	0.122757
A4	CY L 13-126 T	ALK	28.9737	29.7719	1.27272	8.66851	9.50245	0.74124	0.876486			CY L 13-126 T	HMBS	20.3052	20.2695	0.168836				CY L 11-38 U	ALK	26.7222	26.9287	0.187909	26.7222	5.81309	0.156595	-2.81287	7.02682	3.79731	0.0719275
A5	CY L 13-126 T	ALK	29.1024			9.01679						CY L 13-126 T	HMBS	20.0856						CY L 11-30 U	ALK	27.1086	26.8531	0.308749	27.1086	5.6108	0.426673	-3.01517	8.08455	4.44236	0.0459956
A6	CY L 13-126 T	ALK	31.2396			10.822						CY L 13-126 T	HMBS	20.4176						CY D 13-55 U	ALK	26.7961	26.8801	0.241006	26.7961	6.41353	0.140292	-2.21243	4.63456	-3.71041	13.0902
A7	CY L 13-125 U	ALK	29.4662	29.4755	0.462159	8.60776	8.67173	0.274339	0.0457713			CY L 13-125 U	HMBS	20.8584	20.8038	0.110433				CY D 11-29 U	ALK	27.9199	27.8038	0.102761	27.9199	6.11361	0.147901	-2.51235	5.70548	-0.57052	1.48506
A8	CY L 13-125 U	ALK	29.0181			8.34142						CY L 13-125 U	HMBS	20.6767						CY D 11-18 U	ALK	28.324	28.367	0.248856	28.324	7.45379	0.155675	-1.17217	2.2535	-3.59702	12.1007
A9	CY L 13-125 U	ALK	29.9423			9.06602						CY L 13-125 U	HMBS	20.8763						CY B 13-68 U	ALK	24.9945	24.8303	0.296085	24.9945	3.67867	0.243824	-4.94729	30.852	1.39951	0.379058
A10	CY L 13-125 T	ALK	Undetermined	32.585	0.941074		11.1785	0.666505	2.5525			CY L 13-125 T	HMBS	21.3448	21.4066	0.0652405				CY B 12-40 U	ALK	26.2102	25.7704	0.419374	26.2102	3.48815	0.329148	-5.13781	35.2075	-3.9736	15.7099
A11	CY L 13-125 T	ALK	31.9196			10.5195						CY L 13-125 T	HMBS	21.4001						CY A 11-16 U	ALK	30.4085	30.3894	0.0386619	30.4085	9.41908	0.146758	0.793118	0.577095	3.44813	0.0916242
A12	CY L 13-125 T	ALK	33.2505			11.7757						CY L 13-125 T	HMBS	21.4748						CY A 11-14 U	ALK	28.1383	28.5698	0.653576	28.1383	7.15714	0.385882	-1.46883	2.76797	2.06474	0.23903
A13	CY L 13-124 U	ALK	29.7859	30.1677	0.682324	9.18508	9.40819	0.40604	0.782225			CY L 13-124 U	HMBS	20.6008	20.7595	0.17041
A14	CY L 13-124 U	ALK	30.9554			10.0158						CY L 13-124 U	HMBS	20.9396						CY L 13-126 U	BRCA1	25.9003	25.5199	0.368351	25.9003	4.66584	0.329861	0	1	-0.457372	1.37304
A15	CY L 13-124 U	ALK	29.7616			9.02368						CY L 13-124 U	HMBS	20.738						CY L 13-125 U	BRCA1	25.8105	25.5876	0.33523	25.8105	4.78385	0.203777	0.118006	0.92146	-1.15583	2.22813
A16	CY L 13-124 T	ALK	32.5183	32.6849	0.23555	11.63	11.6521	0.252074	3.02612			CY L 13-124 T	HMBS	20.8883	21.0328	0.327717				CY L 13-124 U	BRCA1	25.3777	25.5586	0.438595	25.3777	4.79915	0.271665	0.133308	0.911739	0.86999	0.547151
A17	CY L 13-124 T	ALK	Undetermined									CY L 13-124 T	HMBS	21.4079						CY L 11-38 U	BRCA1	25.8706	26.0935	0.205778	25.8706	4.97786	0.163911	0.312023	0.805511	1.31431	0.402117
A18	CY L 13-124 T	ALK	32.8514			12.0493						CY L 13-124 T	HMBS	20.8022						CY L 11-30 U	BRCA1	25.6831	25.6185	0.0966367	25.6831	4.37617	0.391647	-0.289675	1.22236	-1.23711	2.35726
A19	CY L 11-38 U	ALK	26.7222	26.9287	0.187909	5.68128	5.81309	0.156595	-2.81287			CY L 11-38 U	HMBS	21.0409	21.1156	0.195591				CY D 13-55 U	BRCA1	25.2219	25.18	0.260083	25.2219	4.71346	0.151223	0.0476151	0.967534	-1.63141	3.09817
A20	CY L 11-38 U	ALK	26.9743			5.63677						CY L 11-38 U	HMBS	21.3376						CY D 11-29 U	BRCA1	25.2864	25.4182	0.274604	25.2864	3.72806	0.208544	-0.937775	1.91557	-1.09713	2.13928
A21	CY L 11-38 U	ALK	27.0896			6.12122						CY L 11-38 U	HMBS	20.9684						CY D 11-18 U	BRCA1	26.1738	26.1288	0.241904	26.1738	5.21556	0.151979	0.549724	0.683151	-2.01793	4.05003
A22	CY L 11-38 T	ALK	33.3836	33.5579	0.362585	12.2818	12.4233	0.224683	3.79731			CY L 11-38 T	HMBS	21.1018	21.1346	0.141347				CY B 13-68 U	BRCA1	26.9041	26.6528	0.420302	26.9041	5.50113	0.298517	0.835293	0.560469	0.299775	0.812379
A23	CY L 11-38 T	ALK	33.3153			12.0259						CY L 11-38 T	HMBS	21.2894						CY B 12-40 U	BRCA1	25.3469	25.2258	0.195593	25.3469	2.94348	0.249931	-1.72236	3.29976	-1.0864	2.12343
A24	CY L 11-38 T	ALK	33.9747			12.9622						CY L 11-38 T	HMBS	21.0125						CY A 11-16 U	BRCA1	25.8634	26.0742	0.23746	25.8634	5.10389	0.199588	0.438046	0.738134	0.151022	0.900612
B1	CY L 11-30 U	ALK	27.1086	26.8531	0.308749	6.39632	5.6108	0.426673	-3.01517			CY L 11-30 U	HMBS	20.7122	21.2423	0.671433				CY A 11-14 U	BRCA1	26.5069	26.3324	0.192656	26.5069	4.91972	0.13744	0.25388	0.838638	-1.27453	2.4192
B2	CY L 11-30 U	ALK	26.51			5.49266						CY L 11-30 U	HMBS	21.0174
B3	CY L 11-30 U	ALK	26.9408			4.94341						CY L 11-30 U	HMBS	21.9973
B4	CY L 11-30 T	ALK	32.8894	33.4721	0.507171	12.7487	13.0683	0.480771	4.44236			CY L 11-30 T	HMBS	20.1407	20.4037	0.660453				Sample Name	Target	Δ Δ Ct untreated	FOLD	Δ Δ Ct Cisplatin	FOLD
B5	CY L 11-30 T	ALK	33.8141			13.8987						CY L 11-30 T	HMBS	19.9153						CY L 13-126 U	ALK	0	1	0.876486	0.544693
B6	CY L 11-30 T	ALK	33.7127			12.5576						CY L 11-30 T	HMBS	21.1552						CY L 13-125 U	ALK	0.0457713	0.968772	2.5525	0.17046
B7	CY D 13-55 U	ALK	26.7961	26.8801	0.241006	6.303	6.41353	0.140292	-2.21243			CY D 13-55 U	HMBS	20.4931	20.4666	0.031018				CY L 13-124 U	ALK	0.782225	0.581469	3.02612	0.122757
B8	CY D 13-55 U	ALK	26.6924			6.21816						CY D 13-55 U	HMBS	20.4742						CY L 11-38 U	ALK	-2.81287	7.02682	3.79731	0.0719275
B9	CY D 13-55 U	ALK	27.1519			6.71944						CY D 13-55 U	HMBS	20.4325						CY L 11-30 U	ALK	-3.01517	8.08455	4.44236	0.0459956
B10	CY D 13-55 T	ALK	25.7201	25.9562	0.212175	4.74652	4.91555	0.151434	-3.71041			CY D 13-55 T	HMBS	20.9736	21.0406	0.154202				CY D 13-55 U	ALK	-2.21243	4.63456	-3.71041	13.0902
B11	CY D 13-55 T	ALK	26.131			5.19963						CY D 13-55 T	HMBS	20.9313						CY D 11-29 U	ALK	-2.51235	5.70548	-0.57052	1.48506
B12	CY D 13-55 T	ALK	26.0175			4.80049						CY D 13-55 T	HMBS	21.217						CY D 11-18 U	ALK	-1.17217	2.2535	-3.59702	12.1007
B13	CY D 11-29 U	ALK	27.9199	27.8038	0.102761	6.10023	6.11361	0.147901	-2.51235			CY D 11-29 U	HMBS	21.8197	21.6901	0.234658				CY B 13-68 U	ALK	-4.94729	30.852	1.39951	0.379058
B14	CY D 11-29 U	ALK	27.7668			5.9353						CY D 11-29 U	HMBS	21.8315						CY B 12-40 U	ALK	-5.13781	35.2075	-3.9736	15.7099
B15	CY D 11-29 U	ALK	27.7246			6.30532						CY D 11-29 U	HMBS	21.4193						CY A 11-16 U	ALK	0.793118	0.577095	3.44813	0.0916242
B16	CY D 11-29 T	ALK	30.6508	30.8772	0.519492	7.77898	8.05544	0.306026	-0.57052			CY D 11-29 T	HMBS	22.8718	22.8217	0.105279				CY A 11-14 U	ALK	-1.46883	2.76797	2.06474	0.23903
B17	CY D 11-29 T	ALK	31.4714			8.57882						CY D 11-29 T	HMBS	22.8926
B18	CY D 11-29 T	ALK	30.5093			7.80853						CY D 11-29 T	HMBS	22.7007						CY L 13-126 U	BRCA1	0	1	-0.457372	1.37304
B19	CY D 11-18 U	ALK	28.324	28.367	0.248856	7.37824	7.45379	0.155675	-1.17217			CY D 11-18 U	HMBS	20.9458	20.9132	0.103802				CY L 13-125 U	BRCA1	0.118006	0.92146	-1.15583	2.22813
B20	CY D 11-18 U	ALK	28.6345			7.63773						CY D 11-18 U	HMBS	20.9968						CY L 13-124 U	BRCA1	0.133308	0.911739	0.86999	0.547151
B21	CY D 11-18 U	ALK	28.1424			7.34541						CY D 11-18 U	HMBS	20.797						CY L 11-38 U	BRCA1	0.312023	0.805511	1.31431	0.402117
B22	CY D 11-18 T	ALK	26.4787	26.6254	0.300693	4.98982	5.02895	0.195917	-3.59702			CY D 11-18 T	HMBS	21.4888	21.5965	0.157271				CY L 11-30 U	BRCA1	-0.289675	1.22236	-1.23711	2.35726
B23	CY D 11-18 T	ALK	26.4263			4.64934						CY D 11-18 T	HMBS	21.777						CY D 13-55 U	BRCA1	0.0476151	0.967534	-1.63141	3.09817
B24	CY D 11-18 T	ALK	26.9713			5.44768						CY D 11-18 T	HMBS	21.5237						CY D 11-29 U	BRCA1	-0.937775	1.91557	-1.09713	2.13928
C1	CY B 13-68 U	ALK	24.9945	24.8303	0.296085	3.9631	3.67867	0.243824	-4.94729			CY B 13-68 U	HMBS	21.0314	21.1516	0.301137				CY D 11-18 U	BRCA1	0.549724	0.683151	-2.01793	4.05003
C2	CY B 13-68 U	ALK	24.4885			3.55933						CY B 13-68 U	HMBS	20.9292						CY B 13-68 U	BRCA1	0.835293	0.560469	0.299775	0.812379
C3	CY B 13-68 U	ALK	25.0079			3.51358						CY B 13-68 U	HMBS	21.4943						CY B 12-40 U	BRCA1	-1.72236	3.29976	-1.0864	2.12343
C4	CY B 13-68 T	ALK	31.8955	31.7968	0.393014	10.1683	10.0255	0.228084	1.39951			CY B 13-68 T	HMBS	21.7272	21.7713	0.0400839				CY A 11-16 U	BRCA1	0.438046	0.738134	0.151022	0.900612
C5	CY B 13-68 T	ALK	32.131			10.3255						CY B 13-68 T	HMBS	21.8055						CY A 11-14 U	BRCA1	0.25388	0.838638	-1.27453	2.4192
C6	CY B 13-68 T	ALK	31.3638			9.58264						CY B 13-68 T	HMBS	21.7812
C7	CY B 12-40 U	ALK	26.2102	25.7704	0.419374	3.61895	3.48815	0.329148	-5.13781			CY B 12-40 U	HMBS	22.5913	22.2823	0.386187
C8	CY B 12-40 U	ALK	25.375			3.52565						CY B 12-40 U	HMBS	21.8493
C9	CY B 12-40 U	ALK	25.7261			3.31985						CY B 12-40 U	HMBS	22.4063
C10	CY B 12-40 T	ALK	27.0594	26.6814	0.379821	5.24001	4.65236	0.257093	-3.9736			CY B 12-40 T	HMBS	21.8193	22.0291	0.232435
C11	CY B 12-40 T	ALK	26.6852			4.69631						CY B 12-40 T	HMBS	21.9889
C12	CY B 12-40 T	ALK	26.2997			4.02076						CY B 12-40 T	HMBS	22.279
C13	CY A 11-16 U	ALK	30.4085	30.3894	0.0386619	9.17734	9.41908	0.146758	0.793118			CY A 11-16 U	HMBS	21.2311	20.9703	0.251235
C14	CY A 11-16 U	ALK	30.3449			9.39497						CY A 11-16 U	HMBS	20.95
C15	CY A 11-16 U	ALK	30.4148			9.68493						CY A 11-16 U	HMBS	20.7299
C16	CY A 11-16 T	ALK	32.7481	33.4115	0.627605	11.3104	12.0741	0.386509	3.44813			CY A 11-16 T	HMBS	21.4377	21.3374	0.232978
C17	CY A 11-16 T	ALK	33.4905			11.987						CY A 11-16 T	HMBS	21.5034
C18	CY A 11-16 T	ALK	33.9959			12.9248						CY A 11-16 T	HMBS	21.0711
C19	CY A 11-14 U	ALK	28.1383	28.5698	0.653576	6.62267	7.15714	0.385882	-1.46883			CY A 11-14 U	HMBS	21.5156	21.4127	0.139833
C20	CY A 11-14 U	ALK	28.2494			6.78044						CY A 11-14 U	HMBS	21.4689
C21	CY A 11-14 U	ALK	29.3218			8.06829						CY A 11-14 U	HMBS	21.2535
C22	CY A 11-14 T	ALK	31.3917	32.1275	0.831321	9.89523	10.6907	0.481714	2.06474			CY A 11-14 T	HMBS	21.4964	21.4368	0.071066
C23	CY A 11-14 T	ALK	31.9616			10.6034						CY A 11-14 T	HMBS	21.3582
C24	CY A 11-14 T	ALK	33.0293			11.5735						CY A 11-14 T	HMBS	21.4558
D1	CY L 13-126 U	BRCA1	25.9003	25.5199	0.368351	4.80847	4.66584	0.329861	0
D2	CY L 13-126 U	BRCA1	25.1649			4.81494
D3	CY L 13-126 U	BRCA1	25.4944			4.37411
D4	CY L 13-126 T	BRCA1	23.9182	24.4779	0.498217	3.61302	4.20847	0.303714	-0.457372
D5	CY L 13-126 T	BRCA1	24.6428			4.55715
D6	CY L 13-126 T	BRCA1	24.8728			4.45524
D7	CY L 13-125 U	BRCA1	25.8105	25.5876	0.33523	4.95211	4.78385	0.203777	0.118006
D8	CY L 13-125 U	BRCA1	25.7503			5.0736
D9	CY L 13-125 U	BRCA1	25.2021			4.32583
D10	CY L 13-125 T	BRCA1	24.8676	24.9166	0.0523536	3.52278	3.51001	0.048295	-1.15583
D11	CY L 13-125 T	BRCA1	24.9718			3.57166
D12	CY L 13-125 T	BRCA1	24.9104			3.43559
D13	CY L 13-124 U	BRCA1	25.3777	25.5586	0.438595	4.77691	4.79915	0.271665	0.133308
D14	CY L 13-124 U	BRCA1	25.2394			4.29977
D15	CY L 13-124 U	BRCA1	26.0587			5.32077
D16	CY L 13-124 T	BRCA1	26.3298	26.5686	0.206987	5.44149	5.53583	0.223787	0.86999
D17	CY L 13-124 T	BRCA1	26.6956			5.28773
D18	CY L 13-124 T	BRCA1	26.6804			5.87827
D19	CY L 11-38 U	BRCA1	25.8706	26.0935	0.205778	4.82965	4.97786	0.163911	0.312023
D20	CY L 11-38 U	BRCA1	26.1337			4.79616
D21	CY L 11-38 U	BRCA1	26.2762			5.30778
D22	CY L 11-38 T	BRCA1	26.9574	27.1147	0.43591	5.85558	5.98015	0.264573	1.31431
D23	CY L 11-38 T	BRCA1	26.7794			5.48992
D24	CY L 11-38 T	BRCA1	27.6075			6.59496
E1	CY L 11-30 U	BRCA1	25.6831	25.6185	0.0966367	4.9709	4.37617	0.391647	-0.289675
E2	CY L 11-30 U	BRCA1	25.6649			4.64755
E3	CY L 11-30 U	BRCA1	25.5074			3.51005
E4	CY L 11-30 T	BRCA1	23.9648	23.8325	0.241511	3.82409	3.42873	0.406007	-1.23711
E5	CY L 11-30 T	BRCA1	23.9789			4.06356
E6	CY L 11-30 T	BRCA1	23.5537			2.39853
E7	CY D 13-55 U	BRCA1	25.2219	25.18	0.260083	4.72887	4.71346	0.151223	0.0476151
E8	CY D 13-55 U	BRCA1	24.9016			4.42732
E9	CY D 13-55 U	BRCA1	25.4166			4.98417
E10	CY D 13-55 T	BRCA1	23.963	24.0751	0.103193	2.98941	3.03443	0.107125	-1.63141
E11	CY D 13-55 T	BRCA1	24.0961			3.16474
E12	CY D 13-55 T	BRCA1	24.1661			2.94913
E13	CY D 11-29 U	BRCA1	25.2864	25.4182	0.274604	3.46678	3.72806	0.208544	-0.937775
E14	CY D 11-29 U	BRCA1	25.7339			3.90236
E15	CY D 11-29 U	BRCA1	25.2343			3.81505
E16	CY D 11-29 T	BRCA1	25.8052	26.3904	0.509313	2.93338	3.56871	0.300268	-1.09713
E17	CY D 11-29 T	BRCA1	26.633			3.74036
E18	CY D 11-29 T	BRCA1	26.7331			4.0324
E19	CY D 11-18 U	BRCA1	26.1738	26.1288	0.241904	5.22801	5.21556	0.151979	0.549724
E20	CY D 11-18 U	BRCA1	26.345			5.34818
E21	CY D 11-18 U	BRCA1	25.8675			5.07049
E22	CY D 11-18 T	BRCA1	24.1834	24.2444	0.0741083	2.69455	2.64791	0.100376	-2.01793
E23	CY D 11-18 T	BRCA1	24.2229			2.44596
E24	CY D 11-18 T	BRCA1	24.3269			2.80322
F1	CY B 13-68 U	BRCA1	26.9041	26.6528	0.420302	5.87264	5.50113	0.298517	0.835293
F2	CY B 13-68 U	BRCA1	26.8867			5.95753
F3	CY B 13-68 U	BRCA1	26.1676			4.67324
F4	CY B 13-68 T	BRCA1	26.7879	26.7369	0.0999161	5.06072	4.96562	0.0621556	0.299775
F5	CY B 13-68 T	BRCA1	26.6218			4.81627
F6	CY B 13-68 T	BRCA1	26.8011			5.01987
F7	CY B 12-40 U	BRCA1	25.3469	25.2258	0.195593	2.75566	2.94348	0.249931	-1.72236
F8	CY B 12-40 U	BRCA1	25.3303			3.48093
F9	CY B 12-40 U	BRCA1	25.0001			2.59385
F10	CY B 12-40 T	BRCA1	25.6619	25.6085	0.15302	3.84251	3.57944	0.160666	-1.0864
F11	CY B 12-40 T	BRCA1	25.436			3.44707
F12	CY B 12-40 T	BRCA1	25.7277			3.44874
F13	CY A 11-16 U	BRCA1	25.8634	26.0742	0.23746	4.63228	5.10389	0.199588	0.438046
F14	CY A 11-16 U	BRCA1	26.0278			5.07781
F15	CY A 11-16 U	BRCA1	26.3315			5.60157
F16	CY A 11-16 T	BRCA1	26.5955	26.1543	0.382131	5.15778	4.81686	0.258394	0.151022
F17	CY A 11-16 T	BRCA1	25.9298			4.42642
F18	CY A 11-16 T	BRCA1	25.9375			4.86639
F19	CY A 11-14 U	BRCA1	26.5069	26.3324	0.192656	4.99131	4.91972	0.13744	0.25388
F20	CY A 11-14 U	BRCA1	26.1257			4.65671
F21	CY A 11-14 U	BRCA1	26.3646			5.11115
F22	CY A 11-14 T	BRCA1	24.5478	24.8281	0.538605	3.0514	3.39131	0.313659	-1.27453
F23	CY A 11-14 T	BRCA1	24.4874			3.12926
F24	CY A 11-14 T	BRCA1	25.4491			3.99326
I24
J1	CY L 13-126 U	PDCD1	Undetermined
J2	CY L 13-126 U	PDCD1	Undetermined
J3	CY L 13-126 U	PDCD1	Undetermined
J4	CY L 13-126 T	PDCD1	31.1011	30.88	0.526434		10.6105	0.319186
J5	CY L 13-126 T	PDCD1	30.2791	30.88	0.526434		10.6105	0.319186
J6	CY L 13-126 T	PDCD1	31.2599	30.88	0.526434		10.6105	0.319186
J7	CY L 13-125 U	PDCD1	Undetermined
J8	CY L 13-125 U	PDCD1	Undetermined
J9	CY L 13-125 U	PDCD1	Undetermined
J10	CY L 13-125 T	PDCD1	Undetermined
J11	CY L 13-125 T	PDCD1	Undetermined
J12	CY L 13-125 T	PDCD1	Undetermined
J13	CY L 13-124 U	PDCD1	Undetermined	37.2934
J14	CY L 13-124 U	PDCD1	37.2934	37.2934			16.5339
J15	CY L 13-124 U	PDCD1	Undetermined	37.2934
J16	CY L 13-124 T	PDCD1	11.1478	8.78696	3.33878		-12.2458	2.36845
J17	CY L 13-124 T	PDCD1	Undetermined	8.78696	3.33878
J18	CY L 13-124 T	PDCD1	6.42608	8.78696	3.33878		-12.2458	2.36845
J19	CY L 11-38 U	PDCD1	Undetermined	7.92584
J20	CY L 11-38 U	PDCD1	Undetermined	7.92584
J21	CY L 11-38 U	PDCD1	7.92584	7.92584			-13.1898
J22	CY L 11-38 T	PDCD1	Undetermined	15.1648
J23	CY L 11-38 T	PDCD1	15.1648	15.1648			-5.96977
J24	CY L 11-38 T	PDCD1	Undetermined	15.1648
K1	CY L 11-30 U	PDCD1	Undetermined
K2	CY L 11-30 U	PDCD1	Undetermined
K3	CY L 11-30 U	PDCD1	Undetermined
K4	CY L 11-30 T	PDCD1	39.1622	25.3346	19.5552		4.93087	13.8329
K5	CY L 11-30 T	PDCD1	Undetermined	25.3346	19.5552
K6	CY L 11-30 T	PDCD1	11.507	25.3346	19.5552		4.93087	13.8329
K7	CY D 13-55 U	PDCD1	31.1173	31.4532	0.290864		10.9866	0.168883
K8	CY D 13-55 U	PDCD1	31.6205	31.4532	0.290864		10.9866	0.168883
K9	CY D 13-55 U	PDCD1	31.6217	31.4532	0.290864		10.9866	0.168883
K10	CY D 13-55 T	PDCD1	30.7048	30.7711	0.470219		9.73044	0.285706
K11	CY D 13-55 T	PDCD1	31.2709	30.7711	0.470219		9.73044	0.285706
K12	CY D 13-55 T	PDCD1	30.3375	30.7711	0.470219		9.73044	0.285706
K13	CY D 11-29 U	PDCD1	Undetermined
K14	CY D 11-29 U	PDCD1	Undetermined
K15	CY D 11-29 U	PDCD1	Undetermined
K16	CY D 11-29 T	PDCD1	Undetermined
K17	CY D 11-29 T	PDCD1	Undetermined
K18	CY D 11-29 T	PDCD1	Undetermined
K19	CY D 11-18 U	PDCD1	33.8016	33.9156	0.621707		13.0025	0.363911
K20	CY D 11-18 U	PDCD1	33.3589	33.9156	0.621707		13.0025	0.363911
K21	CY D 11-18 U	PDCD1	34.5865	33.9156	0.621707		13.0025	0.363911
K22	CY D 11-18 T	PDCD1	31.3218	31.114	0.264106		9.51751	0.177469
K23	CY D 11-18 T	PDCD1	30.8168	31.114	0.264106		9.51751	0.177469
K24	CY D 11-18 T	PDCD1	31.2034	31.114	0.264106		9.51751	0.177469
L1	CY B 13-68 U	PDCD1	34.1975	34.5475	0.337457		13.3958	0.261126
L2	CY B 13-68 U	PDCD1	34.8709	34.5475	0.337457		13.3958	0.261126
L3	CY B 13-68 U	PDCD1	34.5739	34.5475	0.337457		13.3958	0.261126
L4	CY B 13-68 T	PDCD1	Undetermined	26.9194	14.9056
L5	CY B 13-68 T	PDCD1	37.4592	26.9194	14.9056		5.14806	10.5399
L6	CY B 13-68 T	PDCD1	16.3795	26.9194	14.9056		5.14806	10.5399
L7	CY B 12-40 U	PDCD1	30.5565	31.2596	0.702522		8.97729	0.462845
L8	CY B 12-40 U	PDCD1	31.9615	31.2596	0.702522		8.97729	0.462845
L9	CY B 12-40 U	PDCD1	31.2607	31.2596	0.702522		8.97729	0.462845
L10	CY B 12-40 T	PDCD1	30.7227	30.7512	0.175391		8.72212	0.168115
L11	CY B 12-40 T	PDCD1	30.5918	30.7512	0.175391		8.72212	0.168115
L12	CY B 12-40 T	PDCD1	30.9391	30.7512	0.175391		8.72212	0.168115
L13	CY A 11-16 U	PDCD1	Undetermined
L14	CY A 11-16 U	PDCD1	Undetermined
L15	CY A 11-16 U	PDCD1	Undetermined
L16	CY A 11-16 T	PDCD1	Undetermined
L17	CY A 11-16 T	PDCD1	Undetermined
L18	CY A 11-16 T	PDCD1	Undetermined
L19	CY A 11-14 U	PDCD1	Undetermined	9.18264	4.0315
L20	CY A 11-14 U	PDCD1	12.0333	9.18264	4.0315		-12.23	2.85185
L21	CY A 11-14 U	PDCD1	6.33194	9.18264	4.0315		-12.23	2.85185
L22	CY A 11-14 T	PDCD1	12.777	12.777			-8.65983
L23	CY A 11-14 T	PDCD1	Undetermined	12.777
L24	CY A 11-14 T	PDCD1	Undetermined	12.777
P21	NTC	PDCD1	Undetermined
P22	NTC	BRCA1	Undetermined
P23	NTC	ALK	Undetermined
P24	NTC	HMBS	Undetermined

## Sheet: Melt Curve Raw Data
Block Type	384-Well Block
Calibration Background is expired	Yes
Calibration Background performed on	2016-02-12 13:07:10 PM PST
Calibration FAM is expired	Yes
Calibration FAM performed on	2016-02-12 14:10:50 PM PST
Calibration NED is expired	Yes
Calibration NED performed on	2014-11-24 13:16:28 PM PST
Calibration ROI is expired	Yes
Calibration ROI performed on	2016-02-12 12:57:08 PM PST
Calibration ROX is expired	Yes
Calibration ROX performed on	2016-02-12 14:26:17 PM PST
Calibration SYBR is expired	Yes
Calibration SYBR performed on	2016-02-12 14:49:42 PM PST
Calibration TAMRA is expired	Yes
Calibration TAMRA performed on	2016-02-12 14:38:45 PM PST
Calibration Uniformity is expired	Yes
Calibration Uniformity performed on	2016-02-12 13:16:49 PM PST
Calibration VIC is expired	Yes
Calibration VIC performed on	2016-02-12 14:01:38 PM PST
Chemistry	SYBR_GREEN
Experiment Barcode
Experiment Comments
Experiment File Name	D:\Documents and Settings\INSTR-USER\Viia7 Experiments\Kenney Lab\2016-11-21 101524 BALD ALK BRCA1 PDCD1 HMBS.eds
Experiment Name	2016-11-21 101524 BALD ALK BRCA1 PDCD1 HMBS
Experiment Run Start Time	2016-11-21 11:10:35 AM PST
Experiment Run Stop Time	2016-11-21 12:57:52 PM PST
Experiment Type	Comparative Cт (ΔΔCт)
Experiment User Name	SHARI
Instrument Name	278880281
Instrument Serial Number	278880281
Instrument Type	ViiA(TM) 7 System
Passive Reference	ROX
Quantification Cycle Method	Ct
Signal Smoothing On	true
Stage/ Cycle where Analysis is performed	Stage 2, Step 2
Well	Well Position	Reading	Temperature	Fluorescence	Derivative
1	A1	1	60.1876	7.18879	0.52949
1	A1	2	60.4557	7.20898	0.515249
1	A1	3	60.7238	7.1294	0.499556
1	A1	4	60.9918	7.06032	0.486887
1	A1	5	61.2599	7.05896	0.481384
1	A1	6	61.528	7.06145	0.484943
1	A1	7	61.7961	6.97406	0.496402
1	A1	8	62.0641	6.91671	0.512364
1	A1	9	62.3322	6.86346	0.529016
1	A1	10	62.6003	6.84138	0.543766
1	A1	11	62.8684	6.73955	0.555916
1	A1	12	63.1365	6.70663	0.566197
1	A1	13	63.4045	6.64931	0.575762
1	A1	14	63.6726	6.60355	0.585253
1	A1	15	63.9407	6.53102	0.594392
1	A1	16	64.2088	6.48592	0.602274
1	A1	17	64.4768	6.42905	0.608094
1	A1	18	64.7449	6.33748	0.611715
1	A1	19	65.013	6.27611	0.613714
1	A1	20	65.2811	6.26133	0.614838
1	A1	21	65.5492	6.19334	0.615483
1	A1	22	65.8172	6.09186	0.615477
1	A1	23	66.0853	6.05896	0.614245
1	A1	24	66.3534	5.98231	0.611059
1	A1	25	66.6215	5.9502	0.605195
1	A1	26	66.8895	5.8864	0.596176
1	A1	27	67.1576	5.78569	0.58412
1	A1	28	67.4257	5.74756	0.570013
1	A1	29	67.6938	5.70563	0.555594
1	A1	30	67.9619	5.66282	0.542861
1	A1	31	68.2299	5.58792	0.533516
1	A1	32	68.498	5.52868	0.528691
1	A1	33	68.7661	5.54053	0.528898
1	A1	34	69.0342	5.42073	0.534035
1	A1	35	69.3022	5.39992	0.543335
1	A1	36	69.5703	5.36298	0.555292
1	A1	37	69.8384	5.28286	0.567793
1	A1	38	70.1065	5.24191	0.578576
1	A1	39	70.3746	5.17716	0.585844
1	A1	40	70.6426	5.08878	0.588756
1	A1	41	70.9107	5.06783	0.587469
1	A1	42	71.1788	4.99307	0.582885
1	A1	43	71.4469	4.94841	0.57628
1	A1	44	71.715	4.85118	0.569052
1	A1	45	71.983	4.84478	0.562506
1	A1	46	72.2511	4.77321	0.557593
1	A1	47	72.5192	4.70488	0.554616
1	A1	48	72.7873	4.69441	0.553155
1	A1	49	73.0553	4.60146	0.55234
1	A1	50	73.3234	4.56077	0.551359
1	A1	51	73.5915	4.49508	0.549923
1	A1	52	73.8596	4.44952	0.548427
1	A1	53	74.1277	4.40915	0.547738
1	A1	54	74.3957	4.33078	0.548723
1	A1	55	74.6638	4.28607	0.551645
1	A1	56	74.9319	4.24024	0.555663
1	A1	57	75.2	4.20256	0.558784
1	A1	58	75.468	4.1214	0.558549
1	A1	59	75.7361	4.06435	0.553287
1	A1	60	76.0042	3.98593	0.543267
1	A1	61	76.2723	3.95421	0.530983
1	A1	62	76.5404	3.9116	0.520231
1	A1	63	76.8084	3.86497	0.514441
1	A1	64	77.0765	3.80647	0.51508
1	A1	65	77.3446	3.77521	0.520977
1	A1	66	77.6127	3.74527	0.528999
1	A1	67	77.8807	3.66929	0.535898
1	A1	68	78.1488	3.56954	0.540405
1	A1	69	78.4169	3.53697	0.544453
1	A1	70	78.685	3.50546	0.552761
1	A1	71	78.9531	3.45518	0.571235
1	A1	72	79.2211	3.40285	0.605378
1	A1	73	79.4892	3.35922	0.660014
1	A1	74	79.7573	3.28415	0.740507
1	A1	75	80.0254	3.21712	0.854528
1	A1	76	80.2934	3.14542	1.01258
1	A1	77	80.5615	3.02412	1.22568
1	A1	78	80.8296	2.98668	1.49972
1	A1	79	81.0977	2.84612	1.8278
1	A1	80	81.3658	2.69335	2.18394
1	A1	81	81.6338	2.45106	2.52216
1	A1	82	81.9019	2.14967	2.78378
1	A1	83	82.17	1.70873	2.9125
1	A1	84	82.4381	1.21511	2.87236
1	A1	85	82.7061	0.811201	2.66102
1	A1	86	82.9742	0.532298	2.31202
1	A1	87	83.2423	0.375173	1.88449
1	A1	88	83.5104	0.313001	1.44484
1	A1	89	83.7785	0.284616	1.04845
1	A1	90	84.0465	0.259935	0.72845
1	A1	91	84.3146	0.245347	0.494114
1	A1	92	84.5827	0.225852	0.336727
1	A1	93	84.8508	0.217101	0.23849
1	A1	94	85.1189	0.20295	0.180292
1	A1	95	85.3869	0.181012	0.146355
1	A1	96	85.655	0.18105	0.12576
1	A1	97	85.9231	0.165721	0.111971
1	A1	98	86.1912	0.156713	0.101564
1	A1	99	86.4592	0.143008	0.0929803
1	A1	100	86.7273	0.13843	0.0856114
1	A1	101	86.9954	0.127282	0.0792497
1	A1	102	87.2635	0.118469	0.0738003
1	A1	103	87.5316	0.120695	0.0691695
1	A1	104	87.7996	0.111477	0.0652648
1	A1	105	88.0677	0.0957539	0.0620567
1	A1	106	88.3358	0.102344	0.0596467
1	A1	107	88.6039	0.0963733	0.0582903
1	A1	108	88.8719	0.087523	0.0583424
1	A1	109	89.14	0.0772347	0.0601089
1	A1	110	89.4081	0.0818704	0.0636199
1	A1	111	89.6762	0.0775741	0.068417
1	A1	112	89.9443	0.0651659	0.0735236
1	A1	113	90.2123	0.047076	0.077717
1	A1	114	90.4804	0.0465711	0.0800106
1	A1	115	90.7485	0.0285652	0.0800611
1	A1	116	91.0166	0.0348928	0.0782339
1	A1	117	91.2846	0.0200661	0.0753032
1	A1	118	91.5527	0.00996698	0.0719979
1	A1	119	91.8208	0.0167188	0.0686638
1	A1	120	92.0889	-0.00126737	0.0651993
1	A1	121	92.357	-0.00252548	0.0612565
1	A1	122	92.625	-0.013386	0.0565687
1	A1	123	92.8931	-0.0179545	0.0511952
1	A1	124	93.1612	-0.0200963	0.0455161
1	A1	125	93.4293	-0.0171767	0.0399781
1	A1	126	93.6973	-0.0275538	0.0347826
1	A1	127	93.9654	-0.0254036	0.0297688
1	A1	128	94.2335	-0.033858	0.0245945
1	A1	129	94.5016	-0.0335883	0.0190748
1	A1	130	94.7697	-0.0374933	0.0134148
2	A2	1	60.1876	7.75043	0.586956
2	A2	2	60.4557	7.82744	0.56935
2	A2	3	60.7238	7.82291	0.559396
2	A2	4	60.9918	7.7586	0.560229
2	A2	5	61.2599	7.6939	0.571039
2	A2	6	61.528	7.70162	0.587751
2	A2	7	61.7961	7.581	0.605198
2	A2	8	62.0641	7.55313	0.619557
2	A2	9	62.3322	7.49065	0.629751
2	A2	10	62.6003	7.42736	0.637381
2	A2	11	62.8684	7.3777	0.645328
2	A2	12	63.1365	7.31719	0.655906
2	A2	13	63.4045	7.28155	0.669505
2	A2	14	63.6726	7.24563	0.684502
2	A2	15	63.9407	7.13958	0.698386
2	A2	16	64.2088	7.06397	0.709219
2	A2	17	64.4768	7.01376	0.716383
2	A2	18	64.7449	6.99042	0.720303
2	A2	19	65.013	6.88373	0.72164
2	A2	20	65.2811	6.85215	0.72089
2	A2	21	65.5492	6.74447	0.718423
2	A2	22	65.8172	6.71584	0.714694
2	A2	23	66.0853	6.63794	0.710037
2	A2	24	66.3534	6.59744	0.704334
2	A2	25	66.6215	6.52349	0.696951
2	A2	26	66.8895	6.44476	0.687332
2	A2	27	67.1576	6.42163	0.675953
2	A2	28	67.4257	6.31295	0.664869
2	A2	29	67.6938	6.28223	0.657217
2	A2	30	67.9619	6.21803	0.655647
2	A2	31	68.2299	6.19531	0.660593
2	A2	32	68.498	6.16269	0.669544
2	A2	33	68.7661	6.04217	0.678048
2	A2	34	69.0342	6.00315	0.681918
2	A2	35	69.3022	5.93219	0.679263
2	A2	36	69.5703	5.85532	0.671135
2	A2	37	69.8384	5.81095	0.660568
2	A2	38	70.1065	5.76863	0.650799
2	A2	39	70.3746	5.72694	0.643922
2	A2	40	70.6426	5.63058	0.640577
2	A2	41	70.9107	5.60762	0.640427
2	A2	42	71.1788	5.53417	0.642713
2	A2	43	71.4469	5.49318	0.646391
2	A2	44	71.715	5.41997	0.649959
2	A2	45	71.983	5.39307	0.651515
2	A2	46	72.2511	5.30777	0.649378
2	A2	47	72.5192	5.24703	0.643099
2	A2	48	72.7873	5.19601	0.634163
2	A2	49	73.0553	5.12523	0.625656
2	A2	50	73.3234	5.09044	0.620857
2	A2	51	73.5915	5.05451	0.62141
2	A2	52	73.8596	5.00436	0.626326
2	A2	53	74.1277	4.92436	0.632442
2	A2	54	74.3957	4.90008	0.636268
2	A2	55	74.6638	4.79006	0.636016
2	A2	56	74.9319	4.73736	0.632503
2	A2	57	75.2	4.71701	0.62837
2	A2	58	75.468	4.64817	0.626174
2	A2	59	75.7361	4.61103	0.626743
2	A2	60	76.0042	4.55864	0.628887
2	A2	61	76.2723	4.47683	0.630576
2	A2	62	76.5404	4.42976	0.630563
2	A2	63	76.8084	4.36915	0.62926
2	A2	64	77.0765	4.31463	0.628279
2	A2	65	77.3446	4.27431	0.629164
2	A2	66	77.6127	4.24505	0.632418
2	A2	67	77.8807	4.15421	0.637643
2	A2	68	78.1488	4.10016	0.644539
2	A2	69	78.4169	4.02509	0.653962
2	A2	70	78.685	4.00479	0.668225
2	A2	71	78.9531	3.95492	0.690836
2	A2	72	79.2211	3.85674	0.726341
2	A2	73	79.4892	3.82633	0.780852
2	A2	74	79.7573	3.76642	0.86307
2	A2	75	80.0254	3.65313	0.984762
2	A2	76	80.2934	3.6459	1.15951
2	A2	77	80.5615	3.51969	1.39885
2	A2	78	80.8296	3.4342	1.70584
2	A2	79	81.0977	3.30693	2.06754
2	A2	80	81.3658	3.15396	2.44981
2	A2	81	81.6338	2.93176	2.79853
2	A2	82	81.9019	2.57381	3.05001
2	A2	83	82.17	2.12766	3.14881
2	A2	84	82.4381	1.67718	3.06658
2	A2	85	82.7061	1.32003	2.81307
2	A2	86	82.9742	1.1022	2.43376
2	A2	87	83.2423	0.970363	1.99493
2	A2	88	83.5104	0.907295	1.56317
2	A2	89	83.7785	0.861008	1.18836
2	A2	90	84.0465	0.816746	0.895725
2	A2	91	84.3146	0.776027	0.687579
2	A2	92	84.5827	0.752263	0.550979
2	A2	93	84.8508	0.713195	0.466543
2	A2	94	85.1189	0.682061	0.415224
2	A2	95	85.3869	0.641222	0.382009
2	A2	96	85.655	0.613574	0.357061
2	A2	97	85.9231	0.577835	0.335259
2	A2	98	86.1912	0.553901	0.314889
2	A2	99	86.4592	0.521589	0.295988
2	A2	100	86.7273	0.501092	0.278811
2	A2	101	86.9954	0.482189	0.262887
2	A2	102	87.2635	0.440845	0.246974
2	A2	103	87.5316	0.428959	0.229761
2	A2	104	87.7996	0.409105	0.210766
2	A2	105	88.0677	0.395801	0.190759
2	A2	106	88.3358	0.379555	0.171429
2	A2	107	88.6039	0.374072	0.154529
2	A2	108	88.8719	0.370004	0.141041
2	A2	109	89.14	0.356963	0.130857
2	A2	110	89.4081	0.333698	0.123109
2	A2	111	89.6762	0.329515	0.116833
2	A2	112	89.9443	0.322659	0.111472
2	A2	113	90.2123	0.315687	0.106882
2	A2	114	90.4804	0.305903	0.102976
2	A2	115	90.7485	0.301857	0.0993888
2	A2	116	91.0166	0.281698	0.0955034
2	A2	117	91.2846	0.281775	0.0908027
2	A2	118	91.5527	0.267081	0.0852084
2	A2	119	91.8208	0.266913	0.0791216
2	A2	120	92.0889	0.265268	0.0731415
2	A2	121	92.357	0.250412	0.0676934
2	A2	122	92.625	0.254489	0.062834
2	A2	123	92.8931	0.241326	0.0583044
2	A2	124	93.1612	0.238762	0.05372
2	A2	125	93.4293	0.239639	0.0487397
2	A2	126	93.6973	0.229419	0.0431446
2	A2	127	93.9654	0.225099	0.0368659
2	A2	128	94.2335	0.229631	0.0300119
2	A2	129	94.5016	0.223121	0.0228962
2	A2	130	94.7697	0.21946	0.0160165
3	A3	1	60.1876	7.76752	0.568152
3	A3	2	60.4557	7.76794	0.568494
3	A3	3	60.7238	7.69473	0.561615
3	A3	4	60.9918	7.62766	0.546639
3	A3	5	61.2599	7.52523	0.526818
3	A3	6	61.528	7.49176	0.508984
3	A3	7	61.7961	7.46241	0.500368
3	A3	8	62.0641	7.43529	0.504651
3	A3	9	62.3322	7.46122	0.51997
3	A3	10	62.6003	7.37217	0.540437
3	A3	11	62.8684	7.19769	0.559974
3	A3	12	63.1365	7.19247	0.575568
3	A3	13	63.4045	7.16321	0.587704
3	A3	14	63.6726	7.11521	0.598301
3	A3	15	63.9407	7.03218	0.608324
3	A3	16	64.2088	6.97139	0.617018
3	A3	17	64.4768	6.91451	0.622944
3	A3	18	64.7449	6.83377	0.625455
3	A3	19	65.013	6.74707	0.625305
3	A3	20	65.2811	6.72627	0.624081
3	A3	21	65.5492	6.68006	0.623121
3	A3	22	65.8172	6.56842	0.622876
3	A3	23	66.0853	6.52743	0.622976
3	A3	24	66.3534	6.4626	0.622699
3	A3	25	66.6215	6.40139	0.621405
3	A3	26	66.8895	6.33913	0.618776
3	A3	27	67.1576	6.2643	0.614909
3	A3	28	67.4257	6.22356	0.610336
3	A3	29	67.6938	6.11688	0.60586
3	A3	30	67.9619	6.12322	0.602154
3	A3	31	68.2299	6.00451	0.599384
3	A3	32	68.498	5.99735	0.597152
3	A3	33	68.7661	5.89805	0.594894
3	A3	34	69.0342	5.8494	0.592402
3	A3	35	69.3022	5.76822	0.590059
3	A3	36	69.5703	5.74476	0.588503
3	A3	37	69.8384	5.66536	0.588065
3	A3	38	70.1065	5.62513	0.588422
3	A3	39	70.3746	5.5435	0.58875
3	A3	40	70.6426	5.4879	0.588244
3	A3	41	70.9107	5.43284	0.586571
3	A3	42	71.1788	5.37471	0.584067
3	A3	43	71.4469	5.30145	0.581546
3	A3	44	71.715	5.25716	0.579924
3	A3	45	71.983	5.19407	0.57974
3	A3	46	72.2511	5.14504	0.580738
3	A3	47	72.5192	5.07517	0.581772
3	A3	48	72.7873	5.04069	0.581202
3	A3	49	73.0553	4.95337	0.577744
3	A3	50	73.3234	4.8946	0.571364
3	A3	51	73.5915	4.82073	0.563565
3	A3	52	73.8596	4.79474	0.556786
3	A3	53	74.1277	4.73131	0.553119
3	A3	54	74.3957	4.68297	0.553186
3	A3	55	74.6638	4.63913	0.555834
3	A3	56	74.9319	4.56261	0.558873
3	A3	57	75.2	4.5025	0.56034
3	A3	58	75.468	4.43607	0.559474
3	A3	59	75.7361	4.39965	0.556892
3	A3	60	76.0042	4.32252	0.553982
3	A3	61	76.2723	4.29156	0.552024
3	A3	62	76.5404	4.2384	0.551592
3	A3	63	76.8084	4.1572	0.552496
3	A3	64	77.0765	4.11744	0.55411
3	A3	65	77.3446	4.07104	0.555842
3	A3	66	77.6127	3.99846	0.557522
3	A3	67	77.8807	3.94124	0.55963
3	A3	68	78.1488	3.89314	0.563374
3	A3	69	78.4169	3.83765	0.570649
3	A3	70	78.685	3.7662	0.583899
3	A3	71	78.9531	3.73153	0.606099
3	A3	72	79.2211	3.65922	0.641051
3	A3	73	79.4892	3.61338	0.69419
3	A3	74	79.7573	3.53493	0.773665
3	A3	75	80.0254	3.4503	0.89098
3	A3	76	80.2934	3.39785	1.06002
3	A3	77	80.5615	3.29476	1.29338
3	A3	78	80.8296	3.21041	1.59602
3	A3	79	81.0977	3.07332	1.95766
3	A3	80	81.3658	2.9119	2.34718
3	A3	81	81.6338	2.62603	2.71292
3	A3	82	81.9019	2.26847	2.99138
3	A3	83	82.17	1.79459	3.12335
3	A3	84	82.4381	1.25342	3.0725
3	A3	85	82.7061	0.813154	2.83853
3	A3	86	82.9742	0.499512	2.45872
3	A3	87	83.2423	0.339268	1.99657
3	A3	88	83.5104	0.265223	1.52263
3	A3	89	83.7785	0.232442	1.09551
3	A3	90	84.0465	0.212481	0.750364
3	A3	91	84.3146	0.194605	0.497266
3	A3	92	84.5827	0.18673	0.327267
3	A3	93	84.8508	0.177388	0.221562
3	A3	94	85.1189	0.162872	0.159604
3	A3	95	85.3869	0.146882	0.124114
3	A3	96	85.655	0.143213	0.10296
3	A3	97	85.9231	0.135831	0.0889239
3	A3	98	86.1912	0.120429	0.0784936
3	A3	99	86.4592	0.11428	0.0704449
3	A3	100	86.7273	0.11187	0.0645572
3	A3	101	86.9954	0.113389	0.0606584
3	A3	102	87.2635	0.0971259	0.0581369
3	A3	103	87.5316	0.0955951	0.0559808
3	A3	104	87.7996	0.0838429	0.0532022
3	A3	105	88.0677	0.0795433	0.0493204
3	A3	106	88.3358	0.080276	0.0445784
3	A3	107	88.6039	0.0676581	0.039761
3	A3	108	88.8719	0.0771751	0.0357371
3	A3	109	89.14	0.0710693	0.0329914
3	A3	110	89.4081	0.0696333	0.0314038
3	A3	111	89.6762	0.0591005	0.0303808
3	A3	112	89.9443	0.05982	0.0292455
3	A3	113	90.2123	0.0567585	0.0276457
3	A3	114	90.4804	0.0508352	0.025743
3	A3	115	90.7485	0.0516655	0.0240816
3	A3	116	91.0166	0.0547182	0.0232348
3	A3	117	91.2846	0.0512664	0.0234543
3	A3	118	91.5527	0.0488334	0.0245307
3	A3	119	91.8208	0.0388901	0.0259208
3	A3	120	92.0889	0.0419407	0.0270225
3	A3	121	92.357	0.0385302	0.027411
3	A3	122	92.625	0.0336168	0.0269288
3	A3	123	92.8931	0.0308905	0.0256393
3	A3	124	93.1612	0.0262643	0.0237227
3	A3	125	93.4293	0.0308565	0.0213739
3	A3	126	93.6973	0.0250563	0.0187368
3	A3	127	93.9654	0.0201605	0.0158933
3	A3	128	94.2335	0.0236912	0.0129034
3	A3	129	94.5016	0.0231335	0.00986656
3	A3	130	94.7697	0.0176064	0.00695236
4	A4	1	60.1876	7.69034	0.597124
4	A4	2	60.4557	7.70326	0.597315
4	A4	3	60.7238	7.62977	0.595814
4	A4	4	60.9918	7.5477	0.592186
4	A4	5	61.2599	7.50152	0.587136
4	A4	6	61.528	7.44289	0.582348
4	A4	7	61.7961	7.39211	0.579609
4	A4	8	62.0641	7.36237	0.579885
4	A4	9	62.3322	7.26829	0.583002
4	A4	10	62.6003	7.22366	0.588144
4	A4	11	62.8684	7.19405	0.594656
4	A4	12	63.1365	7.08926	0.602493
4	A4	13	63.4045	7.02285	0.6118
4	A4	14	63.6726	7.00497	0.622011
4	A4	15	63.9407	6.97109	0.631346
4	A4	16	64.2088	6.86951	0.63744
4	A4	17	64.4768	6.75592	0.638696
4	A4	18	64.7449	6.72947	0.63532
4	A4	19	65.013	6.68045	0.629063
4	A4	20	65.2811	6.59956	0.621998
4	A4	21	65.5492	6.56749	0.615504
4	A4	22	65.8172	6.50353	0.610259
4	A4	23	66.0853	6.40898	0.607004
4	A4	24	66.3534	6.34627	0.60693
4	A4	25	66.6215	6.31852	0.611093
4	A4	26	66.8895	6.29236	0.619211
4	A4	27	67.1576	6.18418	0.629107
4	A4	28	67.4257	6.15888	0.637396
4	A4	29	67.6938	6.03487	0.641024
4	A4	30	67.9619	5.99271	0.638563
4	A4	31	68.2299	5.94774	0.63059
4	A4	32	68.498	5.87003	0.619149
4	A4	33	68.7661	5.80272	0.606947
4	A4	34	69.0342	5.7515	0.596556
4	A4	35	69.3022	5.69664	0.589721
4	A4	36	69.5703	5.63904	0.58686
4	A4	37	69.8384	5.59466	0.586956
4	A4	38	70.1065	5.56169	0.588149
4	A4	39	70.3746	5.42554	0.588775
4	A4	40	70.6426	5.4103	0.588202
4	A4	41	70.9107	5.36186	0.586918
4	A4	42	71.1788	5.28506	0.585854
4	A4	43	71.4469	5.24002	0.585554
4	A4	44	71.715	5.18524	0.585807
4	A4	45	71.983	5.12696	0.585905
4	A4	46	72.2511	5.04581	0.585196
4	A4	47	72.5192	5.01231	0.583407
4	A4	48	72.7873	4.93977	0.580596
4	A4	49	73.0553	4.90415	0.576924
4	A4	50	73.3234	4.82877	0.572556
4	A4	51	73.5915	4.77226	0.567856
4	A4	52	73.8596	4.71846	0.563595
4	A4	53	74.1277	4.66546	0.560909
4	A4	54	74.3957	4.61162	0.560874
4	A4	55	74.6638	4.55612	0.563911
4	A4	56	74.9319	4.52068	0.569386
4	A4	57	75.2	4.43789	0.575659
4	A4	58	75.468	4.39082	0.580546
4	A4	59	75.7361	4.33059	0.582076
4	A4	60	76.0042	4.26473	0.579231
4	A4	61	76.2723	4.21538	0.572498
4	A4	62	76.5404	4.1453	0.563944
4	A4	63	76.8084	4.07606	0.556642
4	A4	64	77.0765	4.06666	0.55352
4	A4	65	77.3446	4.00476	0.556148
4	A4	66	77.6127	3.95623	0.564108
4	A4	67	77.8807	3.89269	0.575399
4	A4	68	78.1488	3.83537	0.587701
4	A4	69	78.4169	3.75635	0.599875
4	A4	70	78.685	3.72399	0.613132
4	A4	71	78.9531	3.64106	0.631597
4	A4	72	79.2211	3.57416	0.662287
4	A4	73	79.4892	3.54564	0.714708
4	A4	74	79.7573	3.46663	0.800255
4	A4	75	80.0254	3.41884	0.931356
4	A4	76	80.2934	3.33484	1.11993
4	A4	77	80.5615	3.23602	1.37425
4	A4	78	80.8296	3.11319	1.69369
4	A4	79	81.0977	2.99778	2.06225
4	A4	80	81.3658	2.80633	2.44391
4	A4	81	81.6338	2.52668	2.78406
4	A4	82	81.9019	2.14198	3.0197
4	A4	83	82.17	1.64926	3.09695
4	A4	84	82.4381	1.14231	2.9894
4	A4	85	82.7061	0.739554	2.70883
4	A4	86	82.9742	0.50317	2.30267
4	A4	87	83.2423	0.387026	1.83894
4	A4	88	83.5104	0.329812	1.38565
4	A4	89	83.7785	0.294207	0.993544
4	A4	90	84.0465	0.27187	0.688036
4	A4	91	84.3146	0.255554	0.47112
4	A4	92	84.5827	0.234547	0.3293
4	A4	93	84.8508	0.224642	0.242751
4	A4	94	85.1189	0.209466	0.192217
4	A4	95	85.3869	0.188798	0.162585
4	A4	96	85.655	0.176835	0.143738
4	A4	97	85.9231	0.162083	0.129842
4	A4	98	86.1912	0.152363	0.118065
4	A4	99	86.4592	0.142016	0.107347
4	A4	100	86.7273	0.128575	0.0974696
4	A4	101	86.9954	0.117128	0.0885031
4	A4	102	87.2635	0.113598	0.0805216
4	A4	103	87.5316	0.110045	0.0734856
4	A4	104	87.7996	0.101701	0.0672265
4	A4	105	88.0677	0.0920022	0.0615213
4	A4	106	88.3358	0.0890663	0.0562286
4	A4	107	88.6039	0.0854544	0.0513987
4	A4	108	88.8719	0.0803285	0.0472659
4	A4	109	89.14	0.0779449	0.0441099
4	A4	110	89.4081	0.0741378	0.0420583
4	A4	111	89.6762	0.0711514	0.0409511
4	A4	112	89.9443	0.0680906	0.040342
4	A4	113	90.2123	0.0589072	0.0396371
4	A4	114	90.4804	0.0560007	0.0383074
4	A4	115	90.7485	0.0574872	0.0360834
4	A4	116	91.0166	0.0463001	0.0330596
4	A4	117	91.2846	0.0458445	0.0296664
4	A4	118	91.5527	0.046472	0.0265065
4	A4	119	91.8208	0.0461136	0.0241047
4	A4	120	92.0889	0.0435541	0.0226832
4	A4	121	92.357	0.0394877	0.022085
4	A4	122	92.625	0.040767	0.0218939
4	A4	123	92.8931	0.0319569	0.021667
4	A4	124	93.1612	0.0330966	0.0211165
4	A4	125	93.4293	0.030858	0.020126
4	A4	126	93.6973	0.032663	0.0186377
4	A4	127	93.9654	0.0294712	0.0165594
4	A4	128	94.2335	0.0209933	0.0138134
4	A4	129	94.5016	0.0236964	0.010489
4	A4	130	94.7697	0.0239665	0.00693792
5	A5	1	60.1876	8.40528	0.665968
5	A5	2	60.4557	8.31269	0.672215
5	A5	3	60.7238	8.27773	0.677867
5	A5	4	60.9918	8.23602	0.680845
5	A5	5	61.2599	8.15152	0.679733
5	A5	6	61.528	8.05873	0.674529
5	A5	7	61.7961	8.05186	0.666873
5	A5	8	62.0641	7.92328	0.659546
5	A5	9	62.3322	7.91895	0.655331
5	A5	10	62.6003	7.84728	0.655782
5	A5	11	62.8684	7.79542	0.660649
5	A5	12	63.1365	7.73581	0.668182
5	A5	13	63.4045	7.65841	0.676132
5	A5	14	63.6726	7.58788	0.682756
5	A5	15	63.9407	7.5274	0.687221
5	A5	16	64.2088	7.50292	0.689541
5	A5	17	64.4768	7.38021	0.690194
5	A5	18	64.7449	7.34221	0.689818
5	A5	19	65.013	7.27476	0.68901
5	A5	20	65.2811	7.24121	0.688245
5	A5	21	65.5492	7.12492	0.687944
5	A5	22	65.8172	7.09619	0.688688
5	A5	23	66.0853	7.02269	0.691383
5	A5	24	66.3534	6.98181	0.69708
5	A5	25	66.6215	6.85056	0.706262
5	A5	26	66.8895	6.85131	0.717961
5	A5	27	67.1576	6.8088	0.729423
5	A5	28	67.4257	6.70186	0.736952
5	A5	29	67.6938	6.59133	0.737703
5	A5	30	67.9619	6.54789	0.731318
5	A5	31	68.2299	6.4843	0.72029
5	A5	32	68.498	6.41649	0.708751
5	A5	33	68.7661	6.34157	0.700452
5	A5	34	69.0342	6.31037	0.697084
5	A5	35	69.3022	6.25092	0.697761
5	A5	36	69.5703	6.15465	0.699634
5	A5	37	69.8384	6.08905	0.69922
5	A5	38	70.1065	6.04931	0.693727
5	A5	39	70.3746	5.96669	0.682024
5	A5	40	70.6426	5.8777	0.665103
5	A5	41	70.9107	5.84303	0.6459
5	A5	42	71.1788	5.77442	0.628409
5	A5	43	71.4469	5.71023	0.616275
5	A5	44	71.715	5.69255	0.611412
5	A5	45	71.983	5.6369	0.613304
5	A5	46	72.2511	5.55724	0.619453
5	A5	47	72.5192	5.51874	0.626687
5	A5	48	72.7873	5.43353	0.632643
5	A5	49	73.0553	5.38632	0.636584
5	A5	50	73.3234	5.32681	0.639253
5	A5	51	73.5915	5.26512	0.64196
5	A5	52	73.8596	5.20521	0.645502
5	A5	53	74.1277	5.15847	0.649556
5	A5	54	74.3957	5.10688	0.652896
5	A5	55	74.6638	5.01516	0.654261
5	A5	56	74.9319	4.93833	0.653202
5	A5	57	75.2	4.91495	0.650352
5	A5	58	75.468	4.83372	0.646921
5	A5	59	75.7361	4.79685	0.644022
5	A5	60	76.0042	4.72324	0.642258
5	A5	61	76.2723	4.64948	0.641782
5	A5	62	76.5404	4.60854	0.642433
5	A5	63	76.8084	4.55379	0.64376
5	A5	64	77.0765	4.49172	0.645054
5	A5	65	77.3446	4.43771	0.645709
5	A5	66	77.6127	4.35288	0.645866
5	A5	67	77.8807	4.29556	0.646855
5	A5	68	78.1488	4.25281	0.650934
5	A5	69	78.4169	4.1828	0.66051
5	A5	70	78.685	4.15958	0.67762
5	A5	71	78.9531	4.06107	0.704389
5	A5	72	79.2211	4.0015	0.74452
5	A5	73	79.4892	3.9242	0.80501
5	A5	74	79.7573	3.87621	0.89701
5	A5	75	80.0254	3.79805	1.03507
5	A5	76	80.2934	3.72925	1.23437
5	A5	77	80.5615	3.61854	1.50577
5	A5	78	80.8296	3.53359	1.84918
5	A5	79	81.0977	3.36684	2.24659
5	A5	80	81.3658	3.1773	2.65802
5	A5	81	81.6338	2.89459	3.02409
5	A5	82	81.9019	2.50685	3.27755
5	A5	83	82.17	1.99977	3.36183
5	A5	84	82.4381	1.48944	3.25007
5	A5	85	82.7061	1.08583	2.95592
5	A5	86	82.9742	0.843448	2.53051
5	A5	87	83.2423	0.710323	2.04628
5	A5	88	83.5104	0.654251	1.57511
5	A5	89	83.7785	0.609802	1.16999
5	A5	90	84.0465	0.570008	0.856756
5	A5	91	84.3146	0.54014	0.636309
5	A5	92	84.5827	0.507451	0.493339
5	A5	93	84.8508	0.475475	0.406224
5	A5	94	85.1189	0.446016	0.354345
5	A5	95	85.3869	0.421477	0.321737
5	A5	96	85.655	0.386809	0.29788
5	A5	97	85.9231	0.354828	0.276947
5	A5	98	86.1912	0.336991	0.256517
5	A5	99	86.4592	0.30786	0.236218
5	A5	100	86.7273	0.287976	0.216535
5	A5	101	86.9954	0.269582	0.197969
5	A5	102	87.2635	0.252329	0.180675
5	A5	103	87.5316	0.236968	0.164533
5	A5	104	87.7996	0.222456	0.14941
5	A5	105	88.0677	0.217661	0.135358
5	A5	106	88.3358	0.205708	0.122662
5	A5	107	88.6039	0.190337	0.111799
5	A5	108	88.8719	0.186044	0.103358
5	A5	109	89.14	0.180581	0.097887
5	A5	110	89.4081	0.174356	0.0956305
5	A5	111	89.6762	0.16477	0.0962452
5	A5	112	89.9443	0.16026	0.0987052
5	A5	113	90.2123	0.141061	0.101538
5	A5	114	90.4804	0.130969	0.103311
5	A5	115	90.7485	0.122398	0.103099
5	A5	116	91.0166	0.111737	0.100676
5	A5	117	91.2846	0.105761	0.0963698
5	A5	118	91.5527	0.0958132	0.0907471
5	A5	119	91.8208	0.0887984	0.0843446
5	A5	120	92.0889	0.0796867	0.0775834
5	A5	121	92.357	0.0759227	0.0708195
5	A5	122	92.625	0.0685576	0.0644004
5	A5	123	92.8931	0.0661258	0.0586233
5	A5	124	93.1612	0.0608732	0.0535978
5	A5	125	93.4293	0.0585997	0.049112
5	A5	126	93.6973	0.0516821	0.0446312
5	A5	127	93.9654	0.0488005	0.0394913
5	A5	128	94.2335	0.0422534	0.0332318
5	A5	129	94.5016	0.0406916	0.0258955
5	A5	130	94.7697	0.036173	0.0181065
6	A6	1	60.1876	9.86847	0.784057
6	A6	2	60.4557	9.74946	0.786013
6	A6	3	60.7238	9.77524	0.788519
6	A6	4	60.9918	9.72127	0.789546
6	A6	5	61.2599	9.55671	0.787165
6	A6	6	61.528	9.52831	0.781127
6	A6	7	61.7961	9.43505	0.773656
6	A6	8	62.0641	9.34235	0.768641
6	A6	9	62.3322	9.3366	0.769537
6	A6	10	62.6003	9.26241	0.777402
6	A6	11	62.8684	9.1671	0.790347
6	A6	12	63.1365	9.11284	0.804646
6	A6	13	63.4045	8.98357	0.816551
6	A6	14	63.6726	8.95585	0.823774
6	A6	15	63.9407	8.86463	0.825944
6	A6	16	64.2088	8.78116	0.824249
6	A6	17	64.4768	8.65772	0.820477
6	A6	18	64.7449	8.64857	0.816091
6	A6	19	65.013	8.59599	0.811699
6	A6	20	65.2811	8.43833	0.807491
6	A6	21	65.5492	8.41728	0.804128
6	A6	22	65.8172	8.31064	0.803337
6	A6	23	66.0853	8.23476	0.807279
6	A6	24	66.3534	8.19971	0.816991
6	A6	25	66.6215	8.12341	0.831077
6	A6	26	66.8895	8.05215	0.845908
6	A6	27	67.1576	7.94627	0.857345
6	A6	28	67.4257	7.81616	0.862767
6	A6	29	67.6938	7.79089	0.861966
6	A6	30	67.9619	7.70878	0.85645
6	A6	31	68.2299	7.60396	0.847875
6	A6	32	68.498	7.56212	0.836905
6	A6	33	68.7661	7.43446	0.823209
6	A6	34	69.0342	7.408	0.806438
6	A6	35	69.3022	7.29671	0.787522
6	A6	36	69.5703	7.22008	0.769332
6	A6	37	69.8384	7.14154	0.756029
6	A6	38	70.1065	7.08986	0.751183
6	A6	39	70.3746	7.0817	0.755655
6	A6	40	70.6426	6.96195	0.766617
6	A6	41	70.9107	6.90548	0.778619
6	A6	42	71.1788	6.82815	0.786187
6	A6	43	71.4469	6.70505	0.78644
6	A6	44	71.715	6.64723	0.780163
6	A6	45	71.983	6.59079	0.770818
6	A6	46	72.2511	6.50428	0.762361
6	A6	47	72.5192	6.49758	0.757344
6	A6	48	72.7873	6.36658	0.75618
6	A6	49	73.0553	6.2853	0.757581
6	A6	50	73.3234	6.26091	0.759457
6	A6	51	73.5915	6.19183	0.759812
6	A6	52	73.8596	6.07761	0.757394
6	A6	53	74.1277	6.01319	0.752135
6	A6	54	74.3957	5.94447	0.74511
6	A6	55	74.6638	5.87699	0.73797
6	A6	56	74.9319	5.8603	0.732205
6	A6	57	75.2	5.70487	0.728621
6	A6	58	75.468	5.67389	0.727328
6	A6	59	75.7361	5.63841	0.727973
6	A6	60	76.0042	5.54755	0.73008
6	A6	61	76.2723	5.46291	0.733365
6	A6	62	76.5404	5.40768	0.73795
6	A6	63	76.8084	5.35874	0.744307
6	A6	64	77.0765	5.25005	0.752797
6	A6	65	77.3446	5.20246	0.763025
6	A6	66	77.6127	5.1662	0.773631
6	A6	67	77.8807	5.06256	0.78298
6	A6	68	78.1488	4.96007	0.790544
6	A6	69	78.4169	4.8801	0.798173
6	A6	70	78.685	4.84438	0.810542
6	A6	71	78.9531	4.76721	0.834718
6	A6	72	79.2211	4.68531	0.879582
6	A6	73	79.4892	4.59763	0.95578
6	A6	74	79.7573	4.55017	1.07613
6	A6	75	80.0254	4.45268	1.25559
6	A6	76	80.2934	4.34557	1.50939
6	A6	77	80.5615	4.23069	1.8479
6	A6	78	80.8296	4.0788	2.26832
6	A6	79	81.0977	3.93339	2.74561
6	A6	80	81.3658	3.6777	3.22755
6	A6	81	81.6338	3.32634	3.63947
6	A6	82	81.9019	2.79423	3.90083
6	A6	83	82.17	2.17937	3.94942
6	A6	84	82.4381	1.60935	3.76354
6	A6	85	82.7061	1.1585	3.37132
6	A6	86	82.9742	0.920313	2.84238
6	A6	87	83.2423	0.790227	2.2654
6	A6	88	83.5104	0.724414	1.72183
6	A6	89	83.7785	0.677265	1.26677
6	A6	90	84.0465	0.642095	0.922611
6	A6	91	84.3146	0.599002	0.684398
6	A6	92	84.5827	0.554386	0.531225
6	A6	93	84.8508	0.533253	0.437474
6	A6	94	85.1189	0.499802	0.380315
6	A6	95	85.3869	0.465434	0.342923
6	A6	96	85.655	0.428925	0.314716
6	A6	97	85.9231	0.40486	0.290198
6	A6	98	86.1912	0.377274	0.267366
6	A6	99	86.4592	0.351027	0.246114
6	A6	100	86.7273	0.336353	0.226841
6	A6	101	86.9954	0.309236	0.20954
6	A6	102	87.2635	0.293773	0.193558
6	A6	103	87.5316	0.273811	0.177952
6	A6	104	87.7996	0.260536	0.162095
6	A6	105	88.0677	0.24662	0.146092
6	A6	106	88.3358	0.234887	0.13079
6	A6	107	88.6039	0.233639	0.117387
6	A6	108	88.8719	0.21834	0.106907
6	A6	109	89.14	0.217899	0.0997704
6	A6	110	89.4081	0.207573	0.095656
6	A6	111	89.6762	0.1928	0.093662
6	A6	112	89.9443	0.190062	0.0926473
6	A6	113	90.2123	0.177086	0.0915729
6	A6	114	90.4804	0.170748	0.0897122
6	A6	115	90.7485	0.16044	0.0867147
6	A6	116	91.0166	0.155297	0.0825901
6	A6	117	91.2846	0.14536	0.077666
6	A6	118	91.5527	0.135701	0.0725003
6	A6	119	91.8208	0.138915	0.067697
6	A6	120	92.0889	0.130874	0.0636578
6	A6	121	92.357	0.126567	0.0603974
6	A6	122	92.625	0.117762	0.0575537
6	A6	123	92.8931	0.112207	0.0545796
6	A6	124	93.1612	0.106798	0.0509697
6	A6	125	93.4293	0.105918	0.0463815
6	A6	126	93.6973	0.103306	0.0406583
6	A6	127	93.9654	0.0921496	0.0338565
6	A6	128	94.2335	0.0908694	0.0263206
6	A6	129	94.5016	0.0935546	0.0187077
6	A6	130	94.7697	0.095538	0.0118421
7	A7	1	60.1876	9.36291	0.713659
7	A7	2	60.4557	9.30493	0.720643
7	A7	3	60.7238	9.19619	0.725248
7	A7	4	60.9918	9.18564	0.725761
7	A7	5	61.2599	9.02632	0.722044
7	A7	6	61.528	9.02339	0.715313
7	A7	7	61.7961	8.91976	0.707334
7	A7	8	62.0641	8.87209	0.699606
7	A7	9	62.3322	8.81231	0.693226
7	A7	10	62.6003	8.68343	0.689166
7	A7	11	62.8684	8.6547	0.688454
7	A7	12	63.1365	8.60353	0.691919
7	A7	13	63.4045	8.53671	0.699558
7	A7	14	63.6726	8.43123	0.71005
7	A7	15	63.9407	8.36546	0.720719
7	A7	16	64.2088	8.34278	0.728202
7	A7	17	64.4768	8.25441	0.72974
7	A7	18	64.7449	8.10197	0.7246
7	A7	19	65.013	8.06732	0.714743
7	A7	20	65.2811	7.99823	0.704206
7	A7	21	65.5492	7.94534	0.697356
7	A7	22	65.8172	7.89089	0.697204
7	A7	23	66.0853	7.8014	0.704584
7	A7	24	66.3534	7.73553	0.718319
7	A7	25	66.6215	7.64856	0.735808
7	A7	26	66.8895	7.62719	0.753533
7	A7	27	67.1576	7.50392	0.767656
7	A7	28	67.4257	7.42963	0.774978
7	A7	29	67.6938	7.35587	0.774126
7	A7	30	67.9619	7.24287	0.766252
7	A7	31	68.2299	7.15938	0.754551
7	A7	32	68.498	7.14168	0.742753
7	A7	33	68.7661	7.04558	0.733425
7	A7	34	69.0342	6.97646	0.727278
7	A7	35	69.3022	6.91005	0.7237
7	A7	36	69.5703	6.80133	0.721978
7	A7	37	69.8384	6.76867	0.722031
7	A7	38	70.1065	6.64993	0.724118
7	A7	39	70.3746	6.65243	0.727851
7	A7	40	70.6426	6.5225	0.731491
7	A7	41	70.9107	6.49092	0.732345
7	A7	42	71.1788	6.36934	0.728183
7	A7	43	71.4469	6.30697	0.718688
7	A7	44	71.715	6.1964	0.705911
7	A7	45	71.983	6.18788	0.693282
7	A7	46	72.2511	6.09908	0.683776
7	A7	47	72.5192	6.03653	0.678461
7	A7	48	72.7873	5.98974	0.676259
7	A7	49	73.0553	5.89503	0.674975
7	A7	50	73.3234	5.82962	0.672756
7	A7	51	73.5915	5.73641	0.66901
7	A7	52	73.8596	5.7084	0.664417
7	A7	53	74.1277	5.64432	0.6603
7	A7	54	74.3957	5.54473	0.657896
7	A7	55	74.6638	5.49819	0.657895
7	A7	56	74.9319	5.42955	0.660222
7	A7	57	75.2	5.37546	0.66409
7	A7	58	75.468	5.3184	0.668311
7	A7	59	75.7361	5.21219	0.671898
7	A7	60	76.0042	5.14458	0.67453
7	A7	61	76.2723	5.1023	0.676546
7	A7	62	76.5404	5.0299	0.678415
7	A7	63	76.8084	4.96827	0.680169
7	A7	64	77.0765	4.8895	0.681336
7	A7	65	77.3446	4.80971	0.681423
7	A7	66	77.6127	4.75683	0.680588
7	A7	67	77.8807	4.68309	0.679972
7	A7	68	78.1488	4.60606	0.681637
7	A7	69	78.4169	4.55163	0.688293
7	A7	70	78.685	4.49115	0.703185
7	A7	71	78.9531	4.40459	0.730385
7	A7	72	79.2211	4.34502	0.775437
7	A7	73	79.4892	4.27401	0.846283
7	A7	74	79.7573	4.20474	0.954049
7	A7	75	80.0254	4.10983	1.1131
7	A7	76	80.2934	4.00066	1.33921
7	A7	77	80.5615	3.92255	1.64483
7	A7	78	80.8296	3.77563	2.03132
7	A7	79	81.0977	3.61318	2.48011
7	A7	80	81.3658	3.38293	2.94698
7	A7	81	81.6338	3.04388	3.3643
7	A7	82	81.9019	2.56447	3.65416
7	A7	83	82.17	1.95262	3.75002
7	A7	84	82.4381	1.31608	3.619
7	A7	85	82.7061	0.843447	3.27499
7	A7	86	82.9742	0.519606	2.7757
7	A7	87	83.2423	0.381936	2.20454
7	A7	88	83.5104	0.321513	1.64554
7	A7	89	83.7785	0.284297	1.16185
7	A7	90	84.0465	0.271635	0.785426
7	A7	91	84.3146	0.246739	0.518936
7	A7	92	84.5827	0.234944	0.345511
7	A7	93	84.8508	0.220665	0.240329
7	A7	94	85.1189	0.201859	0.179475
7	A7	95	85.3869	0.193165	0.144499
7	A7	96	85.655	0.180714	0.12333
7	A7	97	85.9231	0.169004	0.109145
7	A7	98	86.1912	0.157515	0.0985965
7	A7	99	86.4592	0.153131	0.0901968
7	A7	100	86.7273	0.142486	0.0832079
7	A7	101	86.9954	0.130766	0.0770691
7	A7	102	87.2635	0.126828	0.0712718
7	A7	103	87.5316	0.117145	0.0654793
7	A7	104	87.7996	0.110828	0.0596569
7	A7	105	88.0677	0.110192	0.0540573
7	A7	106	88.3358	0.105599	0.0490574
7	A7	107	88.6039	0.100744	0.0449586
7	A7	108	88.8719	0.0950966	0.0418687
7	A7	109	89.14	0.0946829	0.0396915
7	A7	110	89.4081	0.0900415	0.038188
7	A7	111	89.6762	0.0864678	0.0370647
7	A7	112	89.9443	0.0818946	0.0360689
7	A7	113	90.2123	0.0756122	0.0350579
7	A7	114	90.4804	0.0750337	0.0339982
7	A7	115	90.7485	0.0766185	0.0328826
7	A7	116	91.0166	0.0673058	0.0316375
7	A7	117	91.2846	0.0675391	0.0301204
7	A7	118	91.5527	0.0585606	0.0282277
7	A7	119	91.8208	0.0594546	0.0260167
7	A7	120	92.0889	0.0607747	0.0237152
7	A7	121	92.357	0.0548761	0.0215923
7	A7	122	92.625	0.0562321	0.0197893
7	A7	123	92.8931	0.0528341	0.0182366
7	A7	124	93.1612	0.0499209	0.0167089
7	A7	125	93.4293	0.0504088	0.0149658
7	A7	126	93.6973	0.0462859	0.0128856
7	A7	127	93.9654	0.0465312	0.0105238
7	A7	128	94.2335	0.0453083	0.00807843
7	A7	129	94.5016	0.0493696	0.00579511
7	A7	130	94.7697	0.0440213	0.00386839
8	A8	1	60.1876	8.18984	0.637861
8	A8	2	60.4557	8.07386	0.634902
8	A8	3	60.7238	7.99789	0.632864
8	A8	4	60.9918	8.02237	0.633385
8	A8	5	61.2599	7.96493	0.636859
8	A8	6	61.528	7.86228	0.641878
8	A8	7	61.7961	7.81208	0.645957
8	A8	8	62.0641	7.73546	0.647043
8	A8	9	62.3322	7.65825	0.64469
8	A8	10	62.6003	7.60622	0.640254
8	A8	11	62.8684	7.57671	0.636131
8	A8	12	63.1365	7.45568	0.634665
8	A8	13	63.4045	7.42752	0.637206
8	A8	14	63.6726	7.36886	0.643557
8	A8	15	63.9407	7.33397	0.651942
8	A8	16	64.2088	7.23647	0.659466
8	A8	17	64.4768	7.13274	0.662948
8	A8	18	64.7449	7.11819	0.659885
8	A8	19	65.013	7.07994	0.64942
8	A8	20	65.2811	6.91147	0.633149
8	A8	21	65.5492	6.91193	0.61522
8	A8	22	65.8172	6.80789	0.601346
8	A8	23	66.0853	6.81282	0.596683
8	A8	24	66.3534	6.76082	0.603671
8	A8	25	66.6215	6.70381	0.620959
8	A8	26	66.8895	6.62628	0.643956
8	A8	27	67.1576	6.53515	0.666481
8	A8	28	67.4257	6.52025	0.682696
8	A8	29	67.6938	6.42912	0.688791
8	A8	30	67.9619	6.32977	0.684156
8	A8	31	68.2299	6.23618	0.671577
8	A8	32	68.498	6.19105	0.656138
8	A8	33	68.7661	6.16198	0.643013
8	A8	34	69.0342	6.11091	0.635336
8	A8	35	69.3022	6.00903	0.633312
8	A8	36	69.5703	5.99287	0.634917
8	A8	37	69.8384	5.86968	0.637468
8	A8	38	70.1065	5.83828	0.638941
8	A8	39	70.3746	5.80571	0.638415
8	A8	40	70.6426	5.66942	0.635782
8	A8	41	70.9107	5.65536	0.631241
8	A8	42	71.1788	5.6009	0.625029
8	A8	43	71.4469	5.52419	0.617588
8	A8	44	71.715	5.42789	0.609868
8	A8	45	71.983	5.40828	0.603436
8	A8	46	72.2511	5.35886	0.600062
8	A8	47	72.5192	5.2647	0.600894
8	A8	48	72.7873	5.25264	0.605732
8	A8	49	73.0553	5.1764	0.612824
8	A8	50	73.3234	5.09754	0.619412
8	A8	51	73.5915	5.07315	0.62282
8	A8	52	73.8596	4.96439	0.621533
8	A8	53	74.1277	4.90403	0.615682
8	A8	54	74.3957	4.84263	0.606698
8	A8	55	74.6638	4.81754	0.596441
8	A8	56	74.9319	4.754	0.586421
8	A8	57	75.2	4.64932	0.577637
8	A8	58	75.468	4.62738	0.570861
8	A8	59	75.7361	4.58369	0.566926
8	A8	60	76.0042	4.51201	0.566672
8	A8	61	76.2723	4.46089	0.570595
8	A8	62	76.5404	4.41653	0.578458
8	A8	63	76.8084	4.35072	0.589107
8	A8	64	77.0765	4.29811	0.600577
8	A8	65	77.3446	4.24669	0.610571
8	A8	66	77.6127	4.16099	0.617283
8	A8	67	77.8807	4.10859	0.62028
8	A8	68	78.1488	4.03048	0.621089
8	A8	69	78.4169	3.98592	0.623166
8	A8	70	78.685	3.90625	0.631335
8	A8	71	78.9531	3.88756	0.651159
8	A8	72	79.2211	3.79945	0.688756
8	A8	73	79.4892	3.75133	0.751338
8	A8	74	79.7573	3.6718	0.848137
8	A8	75	80.0254	3.61278	0.990814
8	A8	76	80.2934	3.52014	1.19214
8	A8	77	80.5615	3.41979	1.46198
8	A8	78	80.8296	3.31756	1.80061
8	A8	79	81.0977	3.15727	2.19112
8	A8	80	81.3658	2.97044	2.59453
8	A8	81	81.6338	2.66911	2.95203
8	A8	82	81.9019	2.2536	3.19659
8	A8	83	82.17	1.72249	3.27179
8	A8	84	82.4381	1.20687	3.15103
8	A8	85	82.7061	0.775811	2.84831
8	A8	86	82.9742	0.526675	2.41499
8	A8	87	83.2423	0.411292	1.92355
8	A8	88	83.5104	0.351073	1.44578
8	A8	89	83.7785	0.320634	1.03464
8	A8	90	84.0465	0.29509	0.716029
8	A8	91	84.3146	0.274618	0.491007
8	A8	92	84.5827	0.25868	0.344481
8	A8	93	84.8508	0.23861	0.255073
8	A8	94	85.1189	0.225472	0.202457
8	A8	95	85.3869	0.204564	0.17101
8	A8	96	85.655	0.191356	0.150492
8	A8	97	85.9231	0.181939	0.135099
8	A8	98	86.1912	0.162709	0.122048
8	A8	99	86.4592	0.157435	0.110285
8	A8	100	86.7273	0.140832	0.0995586
8	A8	101	86.9954	0.136742	0.089854
8	A8	102	87.2635	0.126306	0.0811438
8	A8	103	87.5316	0.120875	0.0733657
8	A8	104	87.7996	0.111493	0.0664919
8	A8	105	88.0677	0.112103	0.0605604
8	A8	106	88.3358	0.104275	0.0556162
8	A8	107	88.6039	0.102306	0.0516036
8	A8	108	88.8719	0.091288	0.0483049
8	A8	109	89.14	0.0977837	0.0453792
8	A8	110	89.4081	0.0824557	0.0424857
8	A8	111	89.6762	0.0815843	0.0394211
8	A8	112	89.9443	0.0813099	0.0361965
8	A8	113	90.2123	0.0750309	0.0330174
8	A8	114	90.4804	0.0753421	0.030177
8	A8	115	90.7485	0.0696552	0.0279143
8	A8	116	91.0166	0.0714042	0.0263011
8	A8	117	91.2846	0.0697884	0.0252124
8	A8	118	91.5527	0.0635744	0.0243972
8	A8	119	91.8208	0.0595258	0.0236068
8	A8	120	92.0889	0.0608082	0.0226963
8	A8	121	92.357	0.0593644	0.0216386
8	A8	122	92.625	0.056539	0.020468
8	A8	123	92.8931	0.0543358	0.0192226
8	A8	124	93.1612	0.0489435	0.0179219
8	A8	125	93.4293	0.0511044	0.0165538
8	A8	126	93.6973	0.0546868	0.015045
8	A8	127	93.9654	0.0467789	0.0132527
8	A8	128	94.2335	0.0436916	0.0110364
8	A8	129	94.5016	0.0456577	0.00839515
8	A8	130	94.7697	0.0436703	0.00555711
9	A9	1	60.1876	8.07287	0.608616
9	A9	2	60.4557	7.96326	0.600467
9	A9	3	60.7238	7.93877	0.592568
9	A9	4	60.9918	7.90384	0.588807
9	A9	5	61.2599	7.84725	0.592683
9	A9	6	61.528	7.79953	0.605192
9	A9	7	61.7961	7.74473	0.623597
9	A9	8	62.0641	7.72022	0.642129
9	A9	9	62.3322	7.62853	0.654549
9	A9	10	62.6003	7.51966	0.657159
9	A9	11	62.8684	7.4392	0.650478
9	A9	12	63.1365	7.39797	0.638506
9	A9	13	63.4045	7.39762	0.62631
9	A9	14	63.6726	7.29157	0.617675
9	A9	15	63.9407	7.2499	0.614117
9	A9	16	64.2088	7.14151	0.615307
9	A9	17	64.4768	7.17666	0.619997
9	A9	18	64.7449	7.06807	0.626742
9	A9	19	65.013	6.9926	0.634182
9	A9	20	65.2811	6.96543	0.641094
9	A9	21	65.5492	6.85275	0.646406
9	A9	22	65.8172	6.87058	0.649404
9	A9	23	66.0853	6.75084	0.65015
9	A9	24	66.3534	6.6718	0.649885
9	A9	25	66.6215	6.62309	0.650844
9	A9	26	66.8895	6.5877	0.655164
9	A9	27	67.1576	6.51859	0.663382
9	A9	28	67.4257	6.45023	0.673564
9	A9	29	67.6938	6.42618	0.681914
9	A9	30	67.9619	6.30169	0.684623
9	A9	31	68.2299	6.21841	0.67983
9	A9	32	68.498	6.18022	0.668572
9	A9	33	68.7661	6.12563	0.654258
9	A9	34	69.0342	6.05125	0.641132
9	A9	35	69.3022	5.97973	0.632602
9	A9	36	69.5703	5.94943	0.630079
9	A9	37	69.8384	5.90662	0.632671
9	A9	38	70.1065	5.81835	0.637748
9	A9	39	70.3746	5.75905	0.642147
9	A9	40	70.6426	5.69629	0.643426
9	A9	41	70.9107	5.60825	0.640712
9	A9	42	71.1788	5.60775	0.634798
9	A9	43	71.4469	5.47798	0.627649
9	A9	44	71.715	5.43132	0.621564
9	A9	45	71.983	5.43417	0.618282
9	A9	46	72.2511	5.32079	0.618268
9	A9	47	72.5192	5.2724	0.620493
9	A9	48	72.7873	5.23439	0.622784
9	A9	49	73.0553	5.16261	0.622748
9	A9	50	73.3234	5.09996	0.618849
9	A9	51	73.5915	5.00115	0.611153
9	A9	52	73.8596	4.97876	0.601275
9	A9	53	74.1277	4.93803	0.59158
9	A9	54	74.3957	4.84438	0.584117
9	A9	55	74.6638	4.82176	0.579837
9	A9	56	74.9319	4.75833	0.578434
9	A9	57	75.2	4.70149	0.578722
9	A9	58	75.468	4.64493	0.579285
9	A9	59	75.7361	4.58812	0.579087
9	A9	60	76.0042	4.52921	0.577882
9	A9	61	76.2723	4.47903	0.576305
9	A9	62	76.5404	4.42251	0.575622
9	A9	63	76.8084	4.35555	0.577221
9	A9	64	77.0765	4.33328	0.582
9	A9	65	77.3446	4.26955	0.589966
9	A9	66	77.6127	4.20072	0.60019
9	A9	67	77.8807	4.14617	0.611159
9	A9	68	78.1488	4.09544	0.621517
9	A9	69	78.4169	4.03287	0.631113
9	A9	70	78.685	3.96165	0.642152
9	A9	71	78.9531	3.87841	0.660048
9	A9	72	79.2211	3.83362	0.69348
9	A9	73	79.4892	3.80011	0.753586
9	A9	74	79.7573	3.73412	0.852766
9	A9	75	80.0254	3.68036	1.00352
9	A9	76	80.2934	3.57083	1.21689
9	A9	77	80.5615	3.4601	1.49929
9	A9	78	80.8296	3.37567	1.84683
9	A9	79	81.0977	3.22146	2.23865
9	A9	80	81.3658	3.00738	2.63278
9	A9	81	81.6338	2.70559	2.9695
9	A9	82	81.9019	2.29423	3.18396
9	A9	83	82.17	1.77874	3.22523
9	A9	84	82.4381	1.28644	3.07436
9	A9	85	82.7061	0.908471	2.75267
9	A9	86	82.9742	0.702326	2.3159
9	A9	87	83.2423	0.597081	1.83654
9	A9	88	83.5104	0.544861	1.38241
9	A9	89	83.7785	0.515165	1.00045
9	A9	90	84.0465	0.481454	0.710808
9	A9	91	84.3146	0.455783	0.51072
9	A9	92	84.5827	0.435848	0.383609
9	A9	93	84.8508	0.415385	0.308346
9	A9	94	85.1189	0.388782	0.265619
9	A9	95	85.3869	0.369689	0.240829
9	A9	96	85.655	0.342951	0.224479
9	A9	97	85.9231	0.323374	0.211311
9	A9	98	86.1912	0.301109	0.199046
9	A9	99	86.4592	0.283759	0.187138
9	A9	100	86.7273	0.264281	0.175719
9	A9	101	86.9954	0.248101	0.164899
9	A9	102	87.2635	0.230816	0.154515
9	A9	103	87.5316	0.219852	0.144282
9	A9	104	87.7996	0.205293	0.134118
9	A9	105	88.0677	0.19302	0.12436
9	A9	106	88.3358	0.185147	0.11569
9	A9	107	88.6039	0.178768	0.108789
9	A9	108	88.8719	0.172838	0.103938
9	A9	109	89.14	0.159165	0.10081
9	A9	110	89.4081	0.148246	0.0985945
9	A9	111	89.6762	0.138214	0.0963581
9	A9	112	89.9443	0.129769	0.0934332
9	A9	113	90.2123	0.1196	0.0896229
9	A9	114	90.4804	0.113272	0.0851581
9	A9	115	90.7485	0.107815	0.0804919
9	A9	116	91.0166	0.0989458	0.076069
9	A9	117	91.2846	0.0938456	0.0721725
9	A9	118	91.5527	0.0863552	0.068872
9	A9	119	91.8208	0.0842683	0.0660497
9	A9	120	92.0889	0.0735814	0.0634689
9	A9	121	92.357	0.0682763	0.0608467
9	A9	122	92.625	0.0630327	0.0579059
9	A9	123	92.8931	0.061005	0.0543993
9	A9	124	93.1612	0.0533704	0.0501358
9	A9	125	93.4293	0.0454659	0.0450282
9	A9	126	93.6973	0.0441339	0.0391442
9	A9	127	93.9654	0.041849	0.0327052
9	A9	128	94.2335	0.0430114	0.0260266
9	A9	129	94.5016	0.0387472	0.0194525
9	A9	130	94.7697	0.0313183	0.0133359
10	A10	1	60.1876	7.91766	0.611288
10	A10	2	60.4557	7.79749	0.60825
10	A10	3	60.7238	7.73049	0.600758
10	A10	4	60.9918	7.70517	0.589983
10	A10	5	61.2599	7.67374	0.578046
10	A10	6	61.528	7.57944	0.5672
10	A10	7	61.7961	7.53605	0.559374
10	A10	8	62.0641	7.46739	0.556167
10	A10	9	62.3322	7.4283	0.558833
10	A10	10	62.6003	7.37054	0.567971
10	A10	11	62.8684	7.3286	0.583003
10	A10	12	63.1365	7.26497	0.601888
10	A10	13	63.4045	7.19426	0.621369
10	A10	14	63.6726	7.11995	0.637695
10	A10	15	63.9407	7.08366	0.647602
10	A10	16	64.2088	6.99597	0.649251
10	A10	17	64.4768	6.86911	0.642823
10	A10	18	64.7449	6.87712	0.63053
10	A10	19	65.013	6.79727	0.615844
10	A10	20	65.2811	6.68159	0.602309
10	A10	21	65.5492	6.69896	0.592355
10	A10	22	65.8172	6.61811	0.586866
10	A10	23	66.0853	6.5806	0.585542
10	A10	24	66.3534	6.44439	0.587746
10	A10	25	66.6215	6.45769	0.593065
10	A10	26	66.8895	6.36533	0.601206
10	A10	27	67.1576	6.35071	0.611552
10	A10	28	67.4257	6.24682	0.622917
10	A10	29	67.6938	6.17033	0.633807
10	A10	30	67.9619	6.1518	0.642837
10	A10	31	68.2299	6.02495	0.648896
10	A10	32	68.498	6.00437	0.651085
10	A10	33	68.7661	5.94811	0.64872
10	A10	34	69.0342	5.81876	0.641672
10	A10	35	69.3022	5.78591	0.630739
10	A10	36	69.5703	5.7092	0.61766
10	A10	37	69.8384	5.66686	0.604599
10	A10	38	70.1065	5.609	0.593372
10	A10	39	70.3746	5.51421	0.584893
10	A10	40	70.6426	5.50877	0.579137
10	A10	41	70.9107	5.41782	0.575545
10	A10	42	71.1788	5.36989	0.573605
10	A10	43	71.4469	5.30397	0.573283
10	A10	44	71.715	5.23843	0.574972
10	A10	45	71.983	5.19468	0.578953
10	A10	46	72.2511	5.15765	0.584691
10	A10	47	72.5192	5.06804	0.590498
10	A10	48	72.7873	5.0165	0.593895
10	A10	49	73.0553	4.95812	0.592672
10	A10	50	73.3234	4.88431	0.586048
10	A10	51	73.5915	4.81433	0.575324
10	A10	52	73.8596	4.73975	0.563478
10	A10	53	74.1277	4.72711	0.553799
10	A10	54	74.3957	4.6676	0.548329
10	A10	55	74.6638	4.62176	0.547014
10	A10	56	74.9319	4.53933	0.548104
10	A10	57	75.2	4.49279	0.549465
10	A10	58	75.468	4.44395	0.549931
10	A10	59	75.7361	4.35908	0.54988
10	A10	60	76.0042	4.31638	0.550764
10	A10	61	76.2723	4.28263	0.554025
10	A10	62	76.5404	4.22579	0.560075
10	A10	63	76.8084	4.15337	0.567959
10	A10	64	77.0765	4.0992	0.575809
10	A10	65	77.3446	4.0538	0.581788
10	A10	66	77.6127	3.95577	0.585024
10	A10	67	77.8807	3.93473	0.586123
10	A10	68	78.1488	3.83249	0.587127
10	A10	69	78.4169	3.80186	0.591086
10	A10	70	78.685	3.74914	0.601679
10	A10	71	78.9531	3.67924	0.623265
10	A10	72	79.2211	3.63159	0.661475
10	A10	73	79.4892	3.54081	0.724045
10	A10	74	79.7573	3.49308	0.821253
10	A10	75	80.0254	3.45108	0.965362
10	A10	76	80.2934	3.33618	1.16851
10	A10	77	80.5615	3.24033	1.43866
10	A10	78	80.8296	3.12988	1.77361
10	A10	79	81.0977	2.97177	2.15461
10	A10	80	81.3658	2.76026	2.54247
10	A10	81	81.6338	2.46266	2.88013
10	A10	82	81.9019	2.03749	3.10385
10	A10	83	82.17	1.51754	3.16093
10	A10	84	82.4381	0.989012	3.02771
10	A10	85	82.7061	0.584408	2.71944
10	A10	86	82.9742	0.33393	2.28681
10	A10	87	83.2423	0.215266	1.80042
10	A10	88	83.5104	0.172649	1.32974
10	A10	89	83.7785	0.15024	0.925868
10	A10	90	84.0465	0.135442	0.613583
10	A10	91	84.3146	0.122119	0.393609
10	A10	92	84.5827	0.112382	0.251091
10	A10	93	84.8508	0.10079	0.165213
10	A10	94	85.1189	0.0981561	0.116275
10	A10	95	85.3869	0.0906525	0.0891167
10	A10	96	85.655	0.0839103	0.073649
10	A10	97	85.9231	0.0715029	0.0639219
10	A10	98	86.1912	0.0730705	0.0568473
10	A10	99	86.4592	0.0633949	0.0510918
10	A10	100	86.7273	0.0560336	0.0462451
10	A10	101	86.9954	0.0585866	0.0422296
10	A10	102	87.2635	0.0512722	0.0389421
10	A10	103	87.5316	0.0486038	0.0361359
10	A10	104	87.7996	0.0421413	0.0335038
10	A10	105	88.0677	0.0407737	0.0308431
10	A10	106	88.3358	0.0386504	0.0281649
10	A10	107	88.6039	0.0369314	0.0256718
10	A10	108	88.8719	0.0316984	0.0236261
10	A10	109	89.14	0.0354423	0.0221908
10	A10	110	89.4081	0.0308142	0.0213316
10	A10	111	89.6762	0.0272133	0.0208233
10	A10	112	89.9443	0.0267767	0.0203563
10	A10	113	90.2123	0.0226669	0.0196863
10	A10	114	90.4804	0.0215043	0.0187482
10	A10	115	90.7485	0.0199434	0.0176704
10	A10	116	91.0166	0.0182153	0.0166792
10	A10	117	91.2846	0.0175191	0.0159446
10	A10	118	91.5527	0.02059	0.0154609
10	A10	119	91.8208	0.00999696	0.0150413
10	A10	120	92.0889	0.0149949	0.0144364
10	A10	121	92.357	0.00854574	0.0134958
10	A10	122	92.625	0.00834567	0.0122568
10	A10	123	92.8931	0.0117244	0.0108936
10	A10	124	93.1612	0.00722883	0.00957004
10	A10	125	93.4293	0.00674091	0.00831455
10	A10	126	93.6973	0.0121263	0.0070181
10	A10	127	93.9654	-0.00112631	0.00555721
10	A10	128	94.2335	0.00618525	0.00393889
10	A10	129	94.5016	0.00503613	0.00234467
10	A10	130	94.7697	0.00833031	0.0010352
11	A11	1	60.1876	8.15039	0.622927
11	A11	2	60.4557	8.144	0.624316
11	A11	3	60.7238	8.05969	0.625219
11	A11	4	60.9918	8.02887	0.624973
11	A11	5	61.2599	7.92655	0.623466
11	A11	6	61.528	7.88701	0.621213
11	A11	7	61.7961	7.84434	0.619043
11	A11	8	62.0641	7.77317	0.617734
11	A11	9	62.3322	7.6972	0.617748
11	A11	10	62.6003	7.64364	0.619175
11	A11	11	62.8684	7.60745	0.621859
11	A11	12	63.1365	7.54952	0.625695
11	A11	13	63.4045	7.43491	0.630947
11	A11	14	63.6726	7.40523	0.638286
11	A11	15	63.9407	7.38189	0.648249
11	A11	16	64.2088	7.24616	0.660415
11	A11	17	64.4768	7.25015	0.672855
11	A11	18	64.7449	7.17027	0.682635
11	A11	19	65.013	7.10135	0.687283
11	A11	20	65.2811	6.97271	0.68633
11	A11	21	65.5492	6.92871	0.68175
11	A11	22	65.8172	6.88333	0.676893
11	A11	23	66.0853	6.85657	0.674608
11	A11	24	66.3534	6.72441	0.675848
11	A11	25	66.6215	6.69768	0.679489
11	A11	26	66.8895	6.63661	0.683268
11	A11	27	67.1576	6.53856	0.685014
11	A11	28	67.4257	6.50371	0.683452
11	A11	29	67.6938	6.39564	0.67836
11	A11	30	67.9619	6.32894	0.670152
11	A11	31	68.2299	6.3341	0.659485
11	A11	32	68.498	6.21703	0.647165
11	A11	33	68.7661	6.13672	0.63437
11	A11	34	69.0342	6.07485	0.622672
11	A11	35	69.3022	6.07111	0.613546
11	A11	36	69.5703	5.98097	0.607669
11	A11	37	69.8384	5.91387	0.604623
11	A11	38	70.1065	5.89343	0.603372
11	A11	39	70.3746	5.77501	0.603127
11	A11	40	70.6426	5.7641	0.603861
11	A11	41	70.9107	5.66506	0.606083
11	A11	42	71.1788	5.66131	0.610096
11	A11	43	71.4469	5.56689	0.615392
11	A11	44	71.715	5.51593	0.620665
11	A11	45	71.983	5.44732	0.624373
11	A11	46	72.2511	5.38824	0.625499
11	A11	47	72.5192	5.32571	0.624038
11	A11	48	72.7873	5.2667	0.620978
11	A11	49	73.0553	5.19332	0.617798
11	A11	50	73.3234	5.14739	0.615681
11	A11	51	73.5915	5.08938	0.614872
11	A11	52	73.8596	5.05354	0.614569
11	A11	53	74.1277	4.95065	0.613527
11	A11	54	74.3957	4.90084	0.610961
11	A11	55	74.6638	4.84187	0.607111
11	A11	56	74.9319	4.7727	0.603032
11	A11	57	75.2	4.74647	0.599903
11	A11	58	75.468	4.67376	0.598397
11	A11	59	75.7361	4.60995	0.598631
11	A11	60	76.0042	4.54111	0.600532
11	A11	61	76.2723	4.50907	0.604191
11	A11	62	76.5404	4.43498	0.609806
11	A11	63	76.8084	4.3859	0.61729
11	A11	64	77.0765	4.31688	0.62586
11	A11	65	77.3446	4.26522	0.634042
11	A11	66	77.6127	4.21122	0.640239
11	A11	67	77.8807	4.12686	0.643674
11	A11	68	78.1488	4.04973	0.645219
11	A11	69	78.4169	3.98518	0.647669
11	A11	70	78.685	3.96973	0.655449
11	A11	71	78.9531	3.8767	0.67424
11	A11	72	79.2211	3.81713	0.711083
11	A11	73	79.4892	3.75867	0.774974
11	A11	74	79.7573	3.68967	0.87735
11	A11	75	80.0254	3.62884	1.03148
11	A11	76	80.2934	3.53788	1.24991
11	A11	77	80.5615	3.45241	1.53963
11	A11	78	80.8296	3.31511	1.89559
11	A11	79	81.0977	3.17156	2.29445
11	A11	80	81.3658	2.91929	2.692
11	A11	81	81.6338	2.62236	3.0275
11	A11	82	81.9019	2.19929	3.23659
11	A11	83	82.17	1.65876	3.26977
11	A11	84	82.4381	1.15904	3.1096
11	A11	85	82.7061	0.779865	2.77852
11	A11	86	82.9742	0.56091	2.33299
11	A11	87	83.2423	0.448417	1.84598
11	A11	88	83.5104	0.402116	1.38569
11	A11	89	83.7785	0.370123	0.999318
11	A11	90	84.0465	0.344249	0.706922
11	A11	91	84.3146	0.317004	0.505217
11	A11	92	84.5827	0.295228	0.376782
11	A11	93	84.8508	0.26487	0.299666
11	A11	94	85.1189	0.253359	0.254082
11	A11	95	85.3869	0.222837	0.22543
11	A11	96	85.655	0.201423	0.204547
11	A11	97	85.9231	0.186416	0.186598
11	A11	98	86.1912	0.167227	0.169623
11	A11	99	86.4592	0.152531	0.153276
11	A11	100	86.7273	0.133475	0.137905
11	A11	101	86.9954	0.126901	0.123962
11	A11	102	87.2635	0.111323	0.111709
11	A11	103	87.5316	0.112035	0.101156
11	A11	104	87.7996	0.0940365	0.0921167
11	A11	105	88.0677	0.0893254	0.0842944
11	A11	106	88.3358	0.0868807	0.0773376
11	A11	107	88.6039	0.0797348	0.0709
11	A11	108	88.8719	0.0651774	0.0647421
11	A11	109	89.14	0.0650225	0.0588492
11	A11	110	89.4081	0.0608469	0.0534592
11	A11	111	89.6762	0.0549686	0.0489247
11	A11	112	89.9443	0.0583333	0.0454675
11	A11	113	90.2123	0.0487221	0.043
11	A11	114	90.4804	0.0435476	0.0411438
11	A11	115	90.7485	0.0406945	0.0394221
11	A11	116	91.0166	0.0359877	0.0374738
11	A11	117	91.2846	0.0378612	0.0351614
11	A11	118	91.5527	0.0293437	0.0325562
11	A11	119	91.8208	0.023958	0.0298636
11	A11	120	92.0889	0.0308275	0.0273418
11	A11	121	92.357	0.0220548	0.0252191
11	A11	122	92.625	0.021252	0.0236061
11	A11	123	92.8931	0.0222163	0.0224266
11	A11	124	93.1612	0.0171559	0.0214111
11	A11	125	93.4293	0.0163956	0.0201816
11	A11	126	93.6973	0.0126696	0.0184043
11	A11	127	93.9654	0.00814707	0.0159406
11	A11	128	94.2335	0.0116437	0.0129153
11	A11	129	94.5016	0.0105317	0.00966264
11	A11	130	94.7697	0.00812609	0.00658672
12	A12	1	60.1876	7.81646	0.63496
12	A12	2	60.4557	7.75453	0.630226
12	A12	3	60.7238	7.69201	0.622773
12	A12	4	60.9918	7.62031	0.614478
12	A12	5	61.2599	7.58662	0.607944
12	A12	6	61.528	7.60594	0.605364
12	A12	7	61.7961	7.4323	0.60789
12	A12	8	62.0641	7.43995	0.615581
12	A12	9	62.3322	7.38359	0.627562
12	A12	10	62.6003	7.2905	0.641898
12	A12	11	62.8684	7.28697	0.655488
12	A12	12	63.1365	7.2051	0.664678
12	A12	13	63.4045	7.12006	0.666821
12	A12	14	63.6726	7.03159	0.661861
12	A12	15	63.9407	6.98726	0.652749
12	A12	16	64.2088	6.89263	0.644069
12	A12	17	64.4768	6.94573	0.639802
12	A12	18	64.7449	6.81146	0.641629
12	A12	19	65.013	6.76999	0.648678
12	A12	20	65.2811	6.67898	0.658352
12	A12	21	65.5492	6.65847	0.667422
12	A12	22	65.8172	6.59834	0.673007
12	A12	23	66.0853	6.51571	0.673534
12	A12	24	66.3534	6.41868	0.669578
12	A12	25	66.6215	6.3667	0.663866
12	A12	26	66.8895	6.31874	0.660022
12	A12	27	67.1576	6.27026	0.660484
12	A12	28	67.4257	6.24444	0.664946
12	A12	29	67.6938	6.12851	0.670453
12	A12	30	67.9619	6.07795	0.673097
12	A12	31	68.2299	6.01005	0.670296
12	A12	32	68.498	5.94498	0.662243
12	A12	33	68.7661	5.88086	0.651864
12	A12	34	69.0342	5.79062	0.643301
12	A12	35	69.3022	5.79008	0.63977
12	A12	36	69.5703	5.7266	0.641937
12	A12	37	69.8384	5.66656	0.647734
12	A12	38	70.1065	5.59568	0.653704
12	A12	39	70.3746	5.50083	0.65693
12	A12	40	70.6426	5.47523	0.656325
12	A12	41	70.9107	5.3857	0.65259
12	A12	42	71.1788	5.34913	0.64715
12	A12	43	71.4469	5.29442	0.641025
12	A12	44	71.715	5.19655	0.634393
12	A12	45	71.983	5.18574	0.627002
12	A12	46	72.2511	5.098	0.618915
12	A12	47	72.5192	5.02602	0.610942
12	A12	48	72.7873	4.99004	0.604414
12	A12	49	73.0553	4.93961	0.60042
12	A12	50	73.3234	4.89527	0.599122
12	A12	51	73.5915	4.82785	0.59963
12	A12	52	73.8596	4.75529	0.600519
12	A12	53	74.1277	4.7141	0.600568
12	A12	54	74.3957	4.65469	0.599301
12	A12	55	74.6638	4.60327	0.597109
12	A12	56	74.9319	4.53734	0.5951
12	A12	57	75.2	4.46351	0.594664
12	A12	58	75.468	4.45257	0.596882
12	A12	59	75.7361	4.37748	0.601967
12	A12	60	76.0042	4.33442	0.60902
12	A12	61	76.2723	4.24512	0.616381
12	A12	62	76.5404	4.23073	0.622332
12	A12	63	76.8084	4.12545	0.625786
12	A12	64	77.0765	4.09064	0.626592
12	A12	65	77.3446	4.02687	0.625365
12	A12	66	77.6127	3.96343	0.623135
12	A12	67	77.8807	3.91981	0.621115
12	A12	68	78.1488	3.8524	0.620842
12	A12	69	78.4169	3.79615	0.624636
12	A12	70	78.685	3.7249	0.636058
12	A12	71	78.9531	3.68684	0.660091
12	A12	72	79.2211	3.63044	0.703098
12	A12	73	79.4892	3.57076	0.772802
12	A12	74	79.7573	3.52064	0.878493
12	A12	75	80.0254	3.41439	1.03093
12	A12	76	80.2934	3.35034	1.24082
12	A12	77	80.5615	3.25872	1.51489
12	A12	78	80.8296	3.14076	1.84944
12	A12	79	81.0977	2.96797	2.22359
12	A12	80	81.3658	2.79905	2.59584
12	A12	81	81.6338	2.48342	2.90807
12	A12	82	81.9019	2.10318	3.09832
12	A12	83	82.17	1.5907	3.11943
12	A12	84	82.4381	1.14612	2.95606
12	A12	85	82.7061	0.794312	2.63196
12	A12	86	82.9742	0.605374	2.20331
12	A12	87	83.2423	0.528056	1.74087
12	A12	88	83.5104	0.475572	1.30909
12	A12	89	83.7785	0.440842	0.950916
12	A12	90	84.0465	0.411856	0.682921
12	A12	91	84.3146	0.394561	0.499836
12	A12	92	84.5827	0.361761	0.383817
12	A12	93	84.8508	0.335172	0.313607
12	A12	94	85.1189	0.315917	0.270686
12	A12	95	85.3869	0.29115	0.241916
12	A12	96	85.655	0.262477	0.219611
12	A12	97	85.9231	0.248039	0.200249
12	A12	98	86.1912	0.232811	0.182776
12	A12	99	86.4592	0.219564	0.167085
12	A12	100	86.7273	0.203543	0.153052
12	A12	101	86.9954	0.182082	0.140236
12	A12	102	87.2635	0.169304	0.128099
12	A12	103	87.5316	0.166152	0.116366
12	A12	104	87.7996	0.156849	0.105185
12	A12	105	88.0677	0.145663	0.0949984
12	A12	106	88.3358	0.141517	0.086273
12	A12	107	88.6039	0.134018	0.0792861
12	A12	108	88.8719	0.128472	0.0740391
12	A12	109	89.14	0.122626	0.0702744
12	A12	110	89.4081	0.11755	0.0675424
12	A12	111	89.6762	0.108507	0.0653129
12	A12	112	89.9443	0.101668	0.0631178
12	A12	113	90.2123	0.0988795	0.0606781
12	A12	114	90.4804	0.091049	0.0579563
12	A12	115	90.7485	0.0894492	0.0551037
12	A12	116	91.0166	0.0798958	0.0523316
12	A12	117	91.2846	0.081554	0.049772
12	A12	118	91.5527	0.076702	0.0473948
12	A12	119	91.8208	0.0671073	0.0450262
12	A12	120	92.0889	0.0672417	0.0424612
12	A12	121	92.357	0.0628437	0.0396084
12	A12	122	92.625	0.0570193	0.0365659
12	A12	123	92.8931	0.0553905	0.0335625
12	A12	124	93.1612	0.0557537	0.0307848
12	A12	125	93.4293	0.0552671	0.0282107
12	A12	126	93.6973	0.0460458	0.0255837
12	A12	127	93.9654	0.0433253	0.0225634
12	A12	128	94.2335	0.0459644	0.0189549
12	A12	129	94.5016	0.0439033	0.0148568
12	A12	130	94.7697	0.0393697	0.0106391
13	A13	1	60.1876	7.59987	0.549009
13	A13	2	60.4557	7.54134	0.552824
13	A13	3	60.7238	7.48954	0.562639
13	A13	4	60.9918	7.51118	0.576512
13	A13	5	61.2599	7.44723	0.589411
13	A13	6	61.528	7.36061	0.595322
13	A13	7	61.7961	7.24985	0.59072
13	A13	8	62.0641	7.20185	0.577081
13	A13	9	62.3322	7.11694	0.560488
13	A13	10	62.6003	7.11656	0.548381
13	A13	11	62.8684	7.11355	0.545547
13	A13	12	63.1365	7.00685	0.552024
13	A13	13	63.4045	6.98102	0.563925
13	A13	14	63.6726	6.89361	0.576193
13	A13	15	63.9407	6.84503	0.585325
13	A13	16	64.2088	6.75701	0.590493
13	A13	17	64.4768	6.74554	0.592912
13	A13	18	64.7449	6.66681	0.594275
13	A13	19	65.013	6.5873	0.595495
13	A13	20	65.2811	6.5818	0.596374
13	A13	21	65.5492	6.50292	0.59626
13	A13	22	65.8172	6.40089	0.59501
13	A13	23	66.0853	6.36266	0.593445
13	A13	24	66.3534	6.32698	0.592844
13	A13	25	66.6215	6.2434	0.593933
13	A13	26	66.8895	6.23564	0.596224
13	A13	27	67.1576	6.13143	0.598275
13	A13	28	67.4257	6.05599	0.598631
13	A13	29	67.6938	6.03552	0.596726
13	A13	30	67.9619	5.94569	0.593076
13	A13	31	68.2299	5.90941	0.588797
13	A13	32	68.498	5.85172	0.584899
13	A13	33	68.7661	5.76448	0.581934
13	A13	34	69.0342	5.75948	0.580002
13	A13	35	69.3022	5.6795	0.579125
13	A13	36	69.5703	5.57901	0.579442
13	A13	37	69.8384	5.5709	0.581053
13	A13	38	70.1065	5.51687	0.583643
13	A13	39	70.3746	5.45876	0.586341
13	A13	40	70.6426	5.37847	0.58811
13	A13	41	70.9107	5.32197	0.588403
13	A13	42	71.1788	5.25764	0.587439
13	A13	43	71.4469	5.21411	0.585785
13	A13	44	71.715	5.15836	0.583593
13	A13	45	71.983	5.11588	0.580276
13	A13	46	72.2511	5.02386	0.575021
13	A13	47	72.5192	4.9706	0.567696
13	A13	48	72.7873	4.92588	0.559368
13	A13	49	73.0553	4.85319	0.551867
13	A13	50	73.3234	4.83094	0.546767
13	A13	51	73.5915	4.77636	0.544463
13	A13	52	73.8596	4.72054	0.544106
13	A13	53	74.1277	4.64351	0.544208
13	A13	54	74.3957	4.59858	0.543425
13	A13	55	74.6638	4.55051	0.541028
13	A13	56	74.9319	4.51509	0.537006
13	A13	57	75.2	4.4209	0.53209
13	A13	58	75.468	4.38038	0.527687
13	A13	59	75.7361	4.33196	0.525604
13	A13	60	76.0042	4.30446	0.527417
13	A13	61	76.2723	4.2355	0.533742
13	A13	62	76.5404	4.19452	0.543833
13	A13	63	76.8084	4.13694	0.555732
13	A13	64	77.0765	4.07543	0.566932
13	A13	65	77.3446	4.02454	0.575259
13	A13	66	77.6127	3.97261	0.579662
13	A13	67	77.8807	3.87152	0.58067
13	A13	68	78.1488	3.84318	0.580328
13	A13	69	78.4169	3.79039	0.58178
13	A13	70	78.685	3.73772	0.588904
13	A13	71	78.9531	3.67698	0.606421
13	A13	72	79.2211	3.60734	0.640528
13	A13	73	79.4892	3.55775	0.699565
13	A13	74	79.7573	3.51133	0.794149
13	A13	75	80.0254	3.45232	0.936297
13	A13	76	80.2934	3.35303	1.13722
13	A13	77	80.5615	3.28231	1.40342
13	A13	78	80.8296	3.15325	1.73126
13	A13	79	81.0977	3.00971	2.10109
13	A13	80	81.3658	2.79973	2.474
13	A13	81	81.6338	2.52304	2.7946
13	A13	82	81.9019	2.13288	3.0021
13	A13	83	82.17	1.62589	3.04748
13	A13	84	82.4381	1.14303	2.91055
13	A13	85	82.7061	0.765778	2.60885
13	A13	86	82.9742	0.549395	2.1934
13	A13	87	83.2423	0.453122	1.73278
13	A13	88	83.5104	0.402828	1.29277
13	A13	89	83.7785	0.37514	0.920023
13	A13	90	84.0465	0.357868	0.635483
13	A13	91	84.3146	0.337031	0.437381
13	A13	92	84.5827	0.316462	0.309877
13	A13	93	84.8508	0.303445	0.232364
13	A13	94	85.1189	0.284677	0.186141
13	A13	95	85.3869	0.265276	0.157504
13	A13	96	85.655	0.258238	0.138048
13	A13	97	85.9231	0.242255	0.123463
13	A13	98	86.1912	0.236993	0.111959
13	A13	99	86.4592	0.22364	0.102895
13	A13	100	86.7273	0.21296	0.0958556
13	A13	101	86.9954	0.207784	0.0902099
13	A13	102	87.2635	0.19494	0.0850906
13	A13	103	87.5316	0.187074	0.0796701
13	A13	104	87.7996	0.174795	0.0735125
13	A13	105	88.0677	0.173267	0.0667566
13	A13	106	88.3358	0.16922	0.0600029
13	A13	107	88.6039	0.166396	0.053977
13	A13	108	88.8719	0.159311	0.0491828
13	A13	109	89.14	0.15718	0.0457264
13	A13	110	89.4081	0.151117	0.0433447
13	A13	111	89.6762	0.151794	0.0415634
13	A13	112	89.9443	0.14221	0.0398857
13	A13	113	90.2123	0.138918	0.037955
13	A13	114	90.4804	0.136328	0.0356577
13	A13	115	90.7485	0.131733	0.0331387
13	A13	116	91.0166	0.133534	0.0307248
13	A13	117	91.2846	0.127645	0.0287891
13	A13	118	91.5527	0.125533	0.0276053
13	A13	119	91.8208	0.123554	0.0272235
13	A13	120	92.0889	0.125005	0.0274048
13	A13	121	92.357	0.12048	0.0276564
13	A13	122	92.625	0.111992	0.0273946
13	A13	123	92.8931	0.108934	0.0261784
13	A13	124	93.1612	0.11077	0.0238861
13	A13	125	93.4293	0.108222	0.0207283
13	A13	126	93.6973	0.102528	0.0171085
13	A13	127	93.9654	0.106588	0.0134419
13	A13	128	94.2335	0.104997	0.0100395
13	A13	129	94.5016	0.102073	0.00708646
13	A13	130	94.7697	0.104523	0.00467384
14	A14	1	60.1876	8.40379	0.696813
14	A14	2	60.4557	8.30424	0.698313
14	A14	3	60.7238	8.25721	0.699199
14	A14	4	60.9918	8.21699	0.698632
14	A14	5	61.2599	8.20642	0.695938
14	A14	6	61.528	8.05706	0.69129
14	A14	7	61.7961	7.99642	0.686322
14	A14	8	62.0641	7.96783	0.683898
14	A14	9	62.3322	7.92563	0.686796
14	A14	10	62.6003	7.85666	0.695958
14	A14	11	62.8684	7.77183	0.709469
14	A14	12	63.1365	7.75325	0.723103
14	A14	13	63.4045	7.68962	0.732394
14	A14	14	63.6726	7.53551	0.735085
14	A14	15	63.9407	7.52733	0.732444
14	A14	16	64.2088	7.41531	0.728504
14	A14	17	64.4768	7.42328	0.72747
14	A14	18	64.7449	7.32915	0.730899
14	A14	19	65.013	7.28716	0.736486
14	A14	20	65.2811	7.21718	0.73922
14	A14	21	65.5492	7.11681	0.734244
14	A14	22	65.8172	7.04901	0.719652
14	A14	23	66.0853	6.97433	0.697738
14	A14	24	66.3534	6.91994	0.674227
14	A14	25	66.6215	6.88355	0.656046
14	A14	26	66.8895	6.81483	0.648819
14	A14	27	67.1576	6.77373	0.655042
14	A14	28	67.4257	6.73053	0.673393
14	A14	29	67.6938	6.67527	0.699121
14	A14	30	67.9619	6.58672	0.725414
14	A14	31	68.2299	6.54266	0.745352
14	A14	32	68.498	6.44813	0.754039
14	A14	33	68.7661	6.38818	0.750176
14	A14	34	69.0342	6.26875	0.736296
14	A14	35	69.3022	6.22203	0.717386
14	A14	36	69.5703	6.2001	0.698457
14	A14	37	69.8384	6.14401	0.682533
14	A14	38	70.1065	6.05788	0.670216
14	A14	39	70.3746	5.98966	0.660854
14	A14	40	70.6426	5.94841	0.654154
14	A14	41	70.9107	5.87927	0.650814
14	A14	42	71.1788	5.82835	0.651767
14	A14	43	71.4469	5.78365	0.656759
14	A14	44	71.715	5.72916	0.663595
14	A14	45	71.983	5.68008	0.668907
14	A14	46	72.2511	5.58114	0.670043
14	A14	47	72.5192	5.50806	0.666809
14	A14	48	72.7873	5.44657	0.661693
14	A14	49	73.0553	5.45545	0.658407
14	A14	50	73.3234	5.33391	0.659706
14	A14	51	73.5915	5.32119	0.666026
14	A14	52	73.8596	5.26537	0.675608
14	A14	53	74.1277	5.15888	0.685711
14	A14	54	74.3957	5.12184	0.693813
14	A14	55	74.6638	5.03562	0.698118
14	A14	56	74.9319	5.02759	0.69748
14	A14	57	75.2	4.90416	0.691405
14	A14	58	75.468	4.86023	0.680462
14	A14	59	75.7361	4.78685	0.666729
14	A14	60	76.0042	4.7195	0.653581
14	A14	61	76.2723	4.71084	0.644647
14	A14	62	76.5404	4.63201	0.6424
14	A14	63	76.8084	4.58658	0.64728
14	A14	64	77.0765	4.51754	0.657691
14	A14	65	77.3446	4.46573	0.670856
14	A14	66	77.6127	4.42762	0.683996
14	A14	67	77.8807	4.33024	0.695468
14	A14	68	78.1488	4.25279	0.705425
14	A14	69	78.4169	4.20642	0.715883
14	A14	70	78.685	4.1763	0.73039
14	A14	71	78.9531	4.06716	0.753805
14	A14	72	79.2211	4.02368	0.792649
14	A14	73	79.4892	3.95068	0.855886
14	A14	74	79.7573	3.87838	0.955479
14	A14	75	80.0254	3.8225	1.10579
14	A14	76	80.2934	3.74352	1.32094
14	A14	77	80.5615	3.61719	1.60965
14	A14	78	80.8296	3.52317	1.96801
14	A14	79	81.0977	3.38779	2.37233
14	A14	80	81.3658	3.1643	2.77615
14	A14	81	81.6338	2.86619	3.1154
14	A14	82	81.9019	2.44387	3.32304
14	A14	83	82.17	1.93721	3.3493
14	A14	84	82.4381	1.48855	3.17939
14	A14	85	82.7061	1.13116	2.8402
14	A14	86	82.9742	0.93661	2.39236
14	A14	87	83.2423	0.847805	1.91085
14	A14	88	83.5104	0.789131	1.46316
14	A14	89	83.7785	0.747763	1.09367
14	A14	90	84.0465	0.714446	0.818997
14	A14	91	84.3146	0.670374	0.632924
14	A14	92	84.5827	0.641879	0.51632
14	A14	93	84.8508	0.603925	0.446733
14	A14	94	85.1189	0.560615	0.404793
14	A14	95	85.3869	0.532677	0.376879
14	A14	96	85.655	0.500349	0.355079
14	A14	97	85.9231	0.462589	0.335794
14	A14	98	86.1912	0.443439	0.317985
14	A14	99	86.4592	0.411674	0.30163
14	A14	100	86.7273	0.380003	0.286691
14	A14	101	86.9954	0.355387	0.272686
14	A14	102	87.2635	0.32355	0.258841
14	A14	103	87.5316	0.309727	0.244526
14	A14	104	87.7996	0.287473	0.229633
14	A14	105	88.0677	0.271762	0.214661
14	A14	106	88.3358	0.251085	0.200497
14	A14	107	88.6039	0.238199	0.188047
14	A14	108	88.8719	0.225491	0.177871
14	A14	109	89.14	0.216459	0.169944
14	A14	110	89.4081	0.192078	0.163638
14	A14	111	89.6762	0.183873	0.157956
14	A14	112	89.9443	0.165332	0.151958
14	A14	113	90.2123	0.151458	0.145151
14	A14	114	90.4804	0.140969	0.137644
14	A14	115	90.7485	0.130543	0.129957
14	A14	116	91.0166	0.126292	0.122626
14	A14	117	91.2846	0.11391	0.115871
14	A14	118	91.5527	0.0982575	0.109534
14	A14	119	91.8208	0.0943149	0.103278
14	A14	120	92.0889	0.0833208	0.0968488
14	A14	121	92.357	0.0767491	0.0902195
14	A14	122	92.625	0.0703693	0.083526
14	A14	123	92.8931	0.0636582	0.0769075
14	A14	124	93.1612	0.0572944	0.0703701
14	A14	125	93.4293	0.0511493	0.0637446
14	A14	126	93.6973	0.0456854	0.0567299
14	A14	127	93.9654	0.0440353	0.0490045
14	A14	128	94.2335	0.0379861	0.0403956
14	A14	129	94.5016	0.0345037	0.0310674
14	A14	130	94.7697	0.026763	0.0216192
15	A15	1	60.1876	8.0425	0.667585
15	A15	2	60.4557	7.94751	0.675502
15	A15	3	60.7238	7.91494	0.680457
15	A15	4	60.9918	7.81536	0.680368
15	A15	5	61.2599	7.76208	0.674706
15	A15	6	61.528	7.72434	0.664681
15	A15	7	61.7961	7.64064	0.65284
15	A15	8	62.0641	7.57815	0.642369
15	A15	9	62.3322	7.507	0.636094
15	A15	10	62.6003	7.45582	0.635482
15	A15	11	62.8684	7.49105	0.640114
15	A15	12	63.1365	7.32832	0.648154
15	A15	13	63.4045	7.2899	0.6574
15	A15	14	63.6726	7.19106	0.666126
15	A15	15	63.9407	7.1967	0.673112
15	A15	16	64.2088	7.13813	0.677357
15	A15	17	64.4768	7.03414	0.67823
15	A15	18	64.7449	6.93673	0.676128
15	A15	19	65.013	6.91375	0.672811
15	A15	20	65.2811	6.84074	0.670681
15	A15	21	65.5492	6.81355	0.671416
15	A15	22	65.8172	6.74133	0.675007
15	A15	23	66.0853	6.63938	0.679933
15	A15	24	66.3534	6.61413	0.684172
15	A15	25	66.6215	6.52742	0.68626
15	A15	26	66.8895	6.48128	0.685707
15	A15	27	67.1576	6.38016	0.682779
15	A15	28	67.4257	6.33543	0.67793
15	A15	29	67.6938	6.29336	0.671485
15	A15	30	67.9619	6.23887	0.663794
15	A15	31	68.2299	6.11488	0.655687
15	A15	32	68.498	6.07271	0.648577
15	A15	33	68.7661	6.05033	0.643931
15	A15	34	69.0342	5.98409	0.642391
15	A15	35	69.3022	5.92722	0.643332
15	A15	36	69.5703	5.83657	0.645294
15	A15	37	69.8384	5.79005	0.646928
15	A15	38	70.1065	5.74243	0.647665
15	A15	39	70.3746	5.65933	0.647716
15	A15	40	70.6426	5.61761	0.647539
15	A15	41	70.9107	5.53954	0.647341
15	A15	42	71.1788	5.51142	0.646953
15	A15	43	71.4469	5.41837	0.646107
15	A15	44	71.715	5.35405	0.644791
15	A15	45	71.983	5.31396	0.643388
15	A15	46	72.2511	5.24933	0.642441
15	A15	47	72.5192	5.19475	0.642243
15	A15	48	72.7873	5.11694	0.642493
15	A15	49	73.0553	5.07196	0.642279
15	A15	50	73.3234	5.03212	0.640425
15	A15	51	73.5915	4.92039	0.636132
15	A15	52	73.8596	4.89519	0.629542
15	A15	53	74.1277	4.80945	0.621886
15	A15	54	74.3957	4.77141	0.615019
15	A15	55	74.6638	4.71247	0.61058
15	A15	56	74.9319	4.67841	0.609331
15	A15	57	75.2	4.58188	0.610954
15	A15	58	75.468	4.54645	0.6144
15	A15	59	75.7361	4.49509	0.618396
15	A15	60	76.0042	4.43056	0.6219
15	A15	61	76.2723	4.35093	0.624298
15	A15	62	76.5404	4.33445	0.625419
15	A15	63	76.8084	4.22645	0.625371
15	A15	64	77.0765	4.21029	0.62435
15	A15	65	77.3446	4.12714	0.622589
15	A15	66	77.6127	4.09093	0.620574
15	A15	67	77.8807	4.00298	0.619437
15	A15	68	78.1488	3.95351	0.621304
15	A15	69	78.4169	3.91621	0.629455
15	A15	70	78.685	3.84859	0.648357
15	A15	71	78.9531	3.78921	0.683763
15	A15	72	79.2211	3.73462	0.742926
15	A15	73	79.4892	3.66748	0.834797
15	A15	74	79.7573	3.625	0.969842
15	A15	75	80.0254	3.52324	1.15894
15	A15	76	80.2934	3.43777	1.41067
15	A15	77	80.5615	3.31558	1.72637
15	A15	78	80.8296	3.18729	2.09373
15	A15	79	81.0977	2.99603	2.48129
15	A15	80	81.3658	2.75815	2.83803
15	A15	81	81.6338	2.41334	3.10141
15	A15	82	81.9019	1.94296	3.2138
15	A15	83	82.17	1.43137	3.14168
15	A15	84	82.4381	1.01339	2.88909
15	A15	85	82.7061	0.749322	2.49821
15	A15	86	82.9742	0.615375	2.03606
15	A15	87	83.2423	0.544266	1.57363
15	A15	88	83.5104	0.50408	1.16664
15	A15	89	83.7785	0.467338	0.84539
15	A15	90	84.0465	0.438849	0.61508
15	A15	91	84.3146	0.413806	0.463511
15	A15	92	84.5827	0.384368	0.370669
15	A15	93	84.8508	0.360602	0.316314
15	A15	94	85.1189	0.338245	0.284079
15	A15	95	85.3869	0.308702	0.262642
15	A15	96	85.655	0.283846	0.245242
15	A15	97	85.9231	0.257899	0.228607
15	A15	98	86.1912	0.242878	0.211769
15	A15	99	86.4592	0.219053	0.194966
15	A15	100	86.7273	0.203927	0.178744
15	A15	101	86.9954	0.185544	0.163425
15	A15	102	87.2635	0.171065	0.148989
15	A15	103	87.5316	0.158133	0.135287
15	A15	104	87.7996	0.153767	0.122314
15	A15	105	88.0677	0.138572	0.110343
15	A15	106	88.3358	0.130422	0.0998072
15	A15	107	88.6039	0.127893	0.0910494
15	A15	108	88.8719	0.122578	0.0840672
15	A15	109	89.14	0.113354	0.0784558
15	A15	110	89.4081	0.102057	0.0735934
15	A15	111	89.6762	0.0955811	0.0689656
15	A15	112	89.9443	0.0916923	0.0644019
15	A15	113	90.2123	0.0897996	0.0600624
15	A15	114	90.4804	0.0822094	0.0562118
15	A15	115	90.7485	0.0800475	0.0529739
15	A15	116	91.0166	0.0732166	0.0502402
15	A15	117	91.2846	0.0680193	0.0477492
15	A15	118	91.5527	0.064785	0.0452287
15	A15	119	91.8208	0.0652252	0.0425048
15	A15	120	92.0889	0.0549085	0.0395525
15	A15	121	92.357	0.0518402	0.0364974
15	A15	122	92.625	0.0507748	0.033557
15	A15	123	92.8931	0.0527614	0.0309111
15	A15	124	93.1612	0.047825	0.0285612
15	A15	125	93.4293	0.0413213	0.0262859
15	A15	126	93.6973	0.0427193	0.0237441
15	A15	127	93.9654	0.0359024	0.0206648
15	A15	128	94.2335	0.0410619	0.0169966
15	A15	129	94.5016	0.0345119	0.012943
15	A15	130	94.7697	0.0337352	0.00889002
16	A16	1	60.1876	8.58527	0.635742
16	A16	2	60.4557	8.55791	0.633381
16	A16	3	60.7238	8.46807	0.634192
16	A16	4	60.9918	8.46903	0.638372
16	A16	5	61.2599	8.42463	0.644708
16	A16	6	61.528	8.27616	0.651343
16	A16	7	61.7961	8.28384	0.657079
16	A16	8	62.0641	8.1239	0.661934
16	A16	9	62.3322	8.08643	0.66646
16	A16	10	62.6003	8.1236	0.670455
16	A16	11	62.8684	8.00326	0.672559
16	A16	12	63.1365	7.83362	0.671361
16	A16	13	63.4045	7.85838	0.66706
16	A16	14	63.6726	7.75079	0.662114
[truncated: 35,996 more rows]
