# Supplementary material for: Differential effects of cisplatin on cybrid cells with varying mitochondrial DNA haplogroups
Source: PeerJ. 2020 Oct 1;8:e9908. doi: 10.7717/peerj.9908 (PMC7533064; doi:10.7717/peerj.9908)
Supplement: Supplemental Information 15 — The raw and normalized data for the EGFR, ERB2, and housekeeper genes. Normalized data was input into GraphPad Prism for analysis afterward. [file peerj-08-9908-s015.xls]

## Sheet: Sample Setup
Block Type	384-Well Block
Calibration Background is expired	No
Calibration Background performed on	2016-02-12 13:07:10 PM PST
Calibration FAM is expired	Yes
Calibration FAM performed on	2016-02-12 14:10:50 PM PST
Calibration NED is expired	Yes
Calibration NED performed on	2014-11-24 13:16:28 PM PST
Calibration ROI is expired	No
Calibration ROI performed on	2016-02-12 12:57:08 PM PST
Calibration ROX is expired	Yes
Calibration ROX performed on	2016-02-12 14:26:17 PM PST
Calibration SYBR is expired	Yes
Calibration SYBR performed on	2016-02-12 14:49:42 PM PST
Calibration TAMRA is expired	Yes
Calibration TAMRA performed on	2016-02-12 14:38:45 PM PST
Calibration Uniformity is expired	No
Calibration Uniformity performed on	2016-02-12 13:16:49 PM PST
Calibration VIC is expired	Yes
Calibration VIC performed on	2016-02-12 14:01:38 PM PST
Chemistry	SYBR_GREEN
Experiment Barcode
Experiment Comments
Experiment File Name	F:\2016-11-28 102413 EGFR ERBB2 HPRT1 BALD.eds
Experiment Name	2016-11-28 102413 EGFR ERBB2 HPRT1 BALD
Experiment Run Start Time	2016-11-28 11:20:14 AM PST
Experiment Run Stop Time	2016-11-28 13:07:44 PM PST
Experiment Type	Comparative Cт (ΔΔCт)
Experiment User Name	SHARI
Instrument Name	278880281
Instrument Serial Number	278880281
Instrument Type	ViiA(TM) 7 System
Passive Reference	ROX
Quantification Cycle Method	Ct
Signal Smoothing On	true
Stage/ Cycle where Analysis is performed	Stage 2, Step 2
Well	Well Position	Sample Name	Sample Color	Biogroup Name	Biogroup Color	Target Name	Target Color	Task	Reporter	Quencher	Quantity	Comments
1	A1	CY L 13-126 U	RGB(176,23,31)			HPRT1	RGB(176,23,31)	UNKNOWN	SYBR	None
2	A2	CY L 11-30 U	RGB(0,245,255)			HPRT1	RGB(176,23,31)	UNKNOWN	SYBR	None
3	A3	CY L 13-126 T	RGB(0,0,255)			HPRT1	RGB(176,23,31)	UNKNOWN	SYBR	None
4	A4	CY L 11-30 T	RGB(238,220,130)			HPRT1	RGB(176,23,31)	UNKNOWN	SYBR	None
5	A5	CY L 13-125 U	RGB(0,139,69)			HPRT1	RGB(176,23,31)	UNKNOWN	SYBR	None
6	A6	CY D 13-55 U	RGB(238,238,0)			HPRT1	RGB(176,23,31)	UNKNOWN	SYBR	None
7	A7	CY L 13-125 T	RGB(255,127,0)			HPRT1	RGB(176,23,31)	UNKNOWN	SYBR	None
8	A8	CY D 13-55 T	RGB(142,142,56)			HPRT1	RGB(176,23,31)	UNKNOWN	SYBR	None
9	A9	CY L 13-124 U	RGB(139,137,112)			HPRT1	RGB(176,23,31)	UNKNOWN	SYBR	None
10	A10	CY D 11-29 U	RGB(238,44,44)			HPRT1	RGB(176,23,31)	UNKNOWN	SYBR	None
11	A11	CY L 13-124 T	RGB(238,121,66)			HPRT1	RGB(176,23,31)	UNKNOWN	SYBR	None
12	A12	CY D 11-29 T	RGB(51,161,201)			HPRT1	RGB(176,23,31)	UNKNOWN	SYBR	None
13	A13	CY L 11-38 U	RGB(142,56,142)			HPRT1	RGB(176,23,31)	UNKNOWN	SYBR	None
14	A14	CY D 11-18 U	RGB(238,18,137)			HPRT1	RGB(176,23,31)	UNKNOWN	SYBR	None
15	A15	CY L 11-38 T	RGB(198,113,113)			HPRT1	RGB(176,23,31)	UNKNOWN	SYBR	None
16	A16	CY D 11-18 T	RGB(176,23,31)			HPRT1	RGB(176,23,31)	UNKNOWN	SYBR	None
17	A17	CY B 13-68 U	RGB(0,0,255)			HPRT1	RGB(176,23,31)	UNKNOWN	SYBR	None
18	A18	CY A 11-16 U	RGB(238,121,66)			HPRT1	RGB(176,23,31)	UNKNOWN	SYBR	None
19	A19	CY B 13-68 T	RGB(0,139,69)			HPRT1	RGB(176,23,31)	UNKNOWN	SYBR	None
20	A20	CY A 11-16 T	RGB(142,56,142)			HPRT1	RGB(176,23,31)	UNKNOWN	SYBR	None
21	A21	CY B 12-40 U	RGB(255,127,0)			HPRT1	RGB(176,23,31)	UNKNOWN	SYBR	None
22	A22	CY A 11-14 U	RGB(198,113,113)			HPRT1	RGB(176,23,31)	UNKNOWN	SYBR	None
23	A23	CY B 12-40 T	RGB(139,137,112)			HPRT1	RGB(176,23,31)	UNKNOWN	SYBR	None
24	A24	CY A 11-14 T	RGB(0,245,255)			HPRT1	RGB(176,23,31)	UNKNOWN	SYBR	None
25	B1	CY L 13-126 U	RGB(176,23,31)			HPRT1	RGB(176,23,31)	UNKNOWN	SYBR	None
26	B2	CY L 11-30 U	RGB(0,245,255)			HPRT1	RGB(176,23,31)	UNKNOWN	SYBR	None
27	B3	CY L 13-126 T	RGB(0,0,255)			HPRT1	RGB(176,23,31)	UNKNOWN	SYBR	None
28	B4	CY L 11-30 T	RGB(238,220,130)			HPRT1	RGB(176,23,31)	UNKNOWN	SYBR	None
29	B5	CY L 13-125 U	RGB(0,139,69)			HPRT1	RGB(176,23,31)	UNKNOWN	SYBR	None
30	B6	CY D 13-55 U	RGB(238,238,0)			HPRT1	RGB(176,23,31)	UNKNOWN	SYBR	None
31	B7	CY L 13-125 T	RGB(255,127,0)			HPRT1	RGB(176,23,31)	UNKNOWN	SYBR	None
32	B8	CY D 13-55 T	RGB(142,142,56)			HPRT1	RGB(176,23,31)	UNKNOWN	SYBR	None
33	B9	CY L 13-124 U	RGB(139,137,112)			HPRT1	RGB(176,23,31)	UNKNOWN	SYBR	None
34	B10	CY D 11-29 U	RGB(238,44,44)			HPRT1	RGB(176,23,31)	UNKNOWN	SYBR	None
35	B11	CY L 13-124 T	RGB(238,121,66)			HPRT1	RGB(176,23,31)	UNKNOWN	SYBR	None
36	B12	CY D 11-29 T	RGB(51,161,201)			HPRT1	RGB(176,23,31)	UNKNOWN	SYBR	None
37	B13	CY L 11-38 U	RGB(142,56,142)			HPRT1	RGB(176,23,31)	UNKNOWN	SYBR	None
38	B14	CY D 11-18 U	RGB(238,18,137)			HPRT1	RGB(176,23,31)	UNKNOWN	SYBR	None
39	B15	CY L 11-38 T	RGB(198,113,113)			HPRT1	RGB(176,23,31)	UNKNOWN	SYBR	None
40	B16	CY D 11-18 T	RGB(176,23,31)			HPRT1	RGB(176,23,31)	UNKNOWN	SYBR	None
41	B17	CY B 13-68 U	RGB(0,0,255)			HPRT1	RGB(176,23,31)	UNKNOWN	SYBR	None
42	B18	CY A 11-16 U	RGB(238,121,66)			HPRT1	RGB(176,23,31)	UNKNOWN	SYBR	None
43	B19	CY B 13-68 T	RGB(0,139,69)			HPRT1	RGB(176,23,31)	UNKNOWN	SYBR	None
44	B20	CY A 11-16 T	RGB(142,56,142)			HPRT1	RGB(176,23,31)	UNKNOWN	SYBR	None
45	B21	CY B 12-40 U	RGB(255,127,0)			HPRT1	RGB(176,23,31)	UNKNOWN	SYBR	None
46	B22	CY A 11-14 U	RGB(198,113,113)			HPRT1	RGB(176,23,31)	UNKNOWN	SYBR	None
47	B23	CY B 12-40 T	RGB(139,137,112)			HPRT1	RGB(176,23,31)	UNKNOWN	SYBR	None
48	B24	CY A 11-14 T	RGB(0,245,255)			HPRT1	RGB(176,23,31)	UNKNOWN	SYBR	None
49	C1	CY L 13-126 U	RGB(176,23,31)			HPRT1	RGB(176,23,31)	UNKNOWN	SYBR	None
50	C2	CY L 11-30 U	RGB(0,245,255)			HPRT1	RGB(176,23,31)	UNKNOWN	SYBR	None
51	C3	CY L 13-126 T	RGB(0,0,255)			HPRT1	RGB(176,23,31)	UNKNOWN	SYBR	None
52	C4	CY L 11-30 T	RGB(238,220,130)			HPRT1	RGB(176,23,31)	UNKNOWN	SYBR	None
53	C5	CY L 13-125 U	RGB(0,139,69)			HPRT1	RGB(176,23,31)	UNKNOWN	SYBR	None
54	C6	CY D 13-55 U	RGB(238,238,0)			HPRT1	RGB(176,23,31)	UNKNOWN	SYBR	None
55	C7	CY L 13-125 T	RGB(255,127,0)			HPRT1	RGB(176,23,31)	UNKNOWN	SYBR	None
56	C8	CY D 13-55 T	RGB(142,142,56)			HPRT1	RGB(176,23,31)	UNKNOWN	SYBR	None
57	C9	CY L 13-124 U	RGB(139,137,112)			HPRT1	RGB(176,23,31)	UNKNOWN	SYBR	None
58	C10	CY D 11-29 U	RGB(238,44,44)			HPRT1	RGB(176,23,31)	UNKNOWN	SYBR	None
59	C11	CY L 13-124 T	RGB(238,121,66)			HPRT1	RGB(176,23,31)	UNKNOWN	SYBR	None
60	C12	CY D 11-29 T	RGB(51,161,201)			HPRT1	RGB(176,23,31)	UNKNOWN	SYBR	None
61	C13	CY L 11-38 U	RGB(142,56,142)			HPRT1	RGB(176,23,31)	UNKNOWN	SYBR	None
62	C14	CY D 11-18 U	RGB(238,18,137)			HPRT1	RGB(176,23,31)	UNKNOWN	SYBR	None
63	C15	CY L 11-38 T	RGB(198,113,113)			HPRT1	RGB(176,23,31)	UNKNOWN	SYBR	None
64	C16	CY D 11-18 T	RGB(176,23,31)			HPRT1	RGB(176,23,31)	UNKNOWN	SYBR	None
65	C17	CY B 13-68 U	RGB(0,0,255)			HPRT1	RGB(176,23,31)	UNKNOWN	SYBR	None
66	C18	CY A 11-16 U	RGB(238,121,66)			HPRT1	RGB(176,23,31)	UNKNOWN	SYBR	None
67	C19	CY B 13-68 T	RGB(0,139,69)			HPRT1	RGB(176,23,31)	UNKNOWN	SYBR	None
68	C20	CY A 11-16 T	RGB(142,56,142)			HPRT1	RGB(176,23,31)	UNKNOWN	SYBR	None
69	C21	CY B 12-40 U	RGB(255,127,0)			HPRT1	RGB(176,23,31)	UNKNOWN	SYBR	None
70	C22	CY A 11-14 U	RGB(198,113,113)			HPRT1	RGB(176,23,31)	UNKNOWN	SYBR	None
71	C23	CY B 12-40 T	RGB(139,137,112)			HPRT1	RGB(176,23,31)	UNKNOWN	SYBR	None
72	C24	CY A 11-14 T	RGB(0,245,255)			HPRT1	RGB(176,23,31)	UNKNOWN	SYBR	None
73	D1	CY L 13-126 U	RGB(176,23,31)			EGFR	RGB(0,0,255)	UNKNOWN	SYBR	None
74	D2	CY L 11-30 U	RGB(0,245,255)			EGFR	RGB(0,0,255)	UNKNOWN	SYBR	None
75	D3	CY L 13-126 T	RGB(0,0,255)			EGFR	RGB(0,0,255)	UNKNOWN	SYBR	None
76	D4	CY L 11-30 T	RGB(238,220,130)			EGFR	RGB(0,0,255)	UNKNOWN	SYBR	None
77	D5	CY L 13-125 U	RGB(0,139,69)			EGFR	RGB(0,0,255)	UNKNOWN	SYBR	None
78	D6	CY D 13-55 U	RGB(238,238,0)			EGFR	RGB(0,0,255)	UNKNOWN	SYBR	None
79	D7	CY L 13-125 T	RGB(255,127,0)			EGFR	RGB(0,0,255)	UNKNOWN	SYBR	None
80	D8	CY D 13-55 T	RGB(142,142,56)			EGFR	RGB(0,0,255)	UNKNOWN	SYBR	None
81	D9	CY L 13-124 U	RGB(139,137,112)			EGFR	RGB(0,0,255)	UNKNOWN	SYBR	None
82	D10	CY D 11-29 U	RGB(238,44,44)			EGFR	RGB(0,0,255)	UNKNOWN	SYBR	None
83	D11	CY L 13-124 T	RGB(238,121,66)			EGFR	RGB(0,0,255)	UNKNOWN	SYBR	None
84	D12	CY D 11-29 T	RGB(51,161,201)			EGFR	RGB(0,0,255)	UNKNOWN	SYBR	None
85	D13	CY L 11-38 U	RGB(142,56,142)			EGFR	RGB(0,0,255)	UNKNOWN	SYBR	None
86	D14	CY D 11-18 U	RGB(238,18,137)			EGFR	RGB(0,0,255)	UNKNOWN	SYBR	None
87	D15	CY L 11-38 T	RGB(198,113,113)			EGFR	RGB(0,0,255)	UNKNOWN	SYBR	None
88	D16	CY D 11-18 T	RGB(176,23,31)			EGFR	RGB(0,0,255)	UNKNOWN	SYBR	None
89	D17	CY B 13-68 U	RGB(0,0,255)			EGFR	RGB(0,0,255)	UNKNOWN	SYBR	None
90	D18	CY A 11-16 U	RGB(238,121,66)			EGFR	RGB(0,0,255)	UNKNOWN	SYBR	None
91	D19	CY B 13-68 T	RGB(0,139,69)			EGFR	RGB(0,0,255)	UNKNOWN	SYBR	None
92	D20	CY A 11-16 T	RGB(142,56,142)			EGFR	RGB(0,0,255)	UNKNOWN	SYBR	None
93	D21	CY B 12-40 U	RGB(255,127,0)			EGFR	RGB(0,0,255)	UNKNOWN	SYBR	None
94	D22	CY A 11-14 U	RGB(198,113,113)			EGFR	RGB(0,0,255)	UNKNOWN	SYBR	None
95	D23	CY B 12-40 T	RGB(139,137,112)			EGFR	RGB(0,0,255)	UNKNOWN	SYBR	None
96	D24	CY A 11-14 T	RGB(0,245,255)			EGFR	RGB(0,0,255)	UNKNOWN	SYBR	None
97	E1	CY L 13-126 U	RGB(176,23,31)			EGFR	RGB(0,0,255)	UNKNOWN	SYBR	None
98	E2	CY L 11-30 U	RGB(0,245,255)			EGFR	RGB(0,0,255)	UNKNOWN	SYBR	None
99	E3	CY L 13-126 T	RGB(0,0,255)			EGFR	RGB(0,0,255)	UNKNOWN	SYBR	None
100	E4	CY L 11-30 T	RGB(238,220,130)			EGFR	RGB(0,0,255)	UNKNOWN	SYBR	None
101	E5	CY L 13-125 U	RGB(0,139,69)			EGFR	RGB(0,0,255)	UNKNOWN	SYBR	None
102	E6	CY D 13-55 U	RGB(238,238,0)			EGFR	RGB(0,0,255)	UNKNOWN	SYBR	None
103	E7	CY L 13-125 T	RGB(255,127,0)			EGFR	RGB(0,0,255)	UNKNOWN	SYBR	None
104	E8	CY D 13-55 T	RGB(142,142,56)			EGFR	RGB(0,0,255)	UNKNOWN	SYBR	None
105	E9	CY L 13-124 U	RGB(139,137,112)			EGFR	RGB(0,0,255)	UNKNOWN	SYBR	None
106	E10	CY D 11-29 U	RGB(238,44,44)			EGFR	RGB(0,0,255)	UNKNOWN	SYBR	None
107	E11	CY L 13-124 T	RGB(238,121,66)			EGFR	RGB(0,0,255)	UNKNOWN	SYBR	None
108	E12	CY D 11-29 T	RGB(51,161,201)			EGFR	RGB(0,0,255)	UNKNOWN	SYBR	None
109	E13	CY L 11-38 U	RGB(142,56,142)			EGFR	RGB(0,0,255)	UNKNOWN	SYBR	None
110	E14	CY D 11-18 U	RGB(238,18,137)			EGFR	RGB(0,0,255)	UNKNOWN	SYBR	None
111	E15	CY L 11-38 T	RGB(198,113,113)			EGFR	RGB(0,0,255)	UNKNOWN	SYBR	None
112	E16	CY D 11-18 T	RGB(176,23,31)			EGFR	RGB(0,0,255)	UNKNOWN	SYBR	None
113	E17	CY B 13-68 U	RGB(0,0,255)			EGFR	RGB(0,0,255)	UNKNOWN	SYBR	None
114	E18	CY A 11-16 U	RGB(238,121,66)			EGFR	RGB(0,0,255)	UNKNOWN	SYBR	None
115	E19	CY B 13-68 T	RGB(0,139,69)			EGFR	RGB(0,0,255)	UNKNOWN	SYBR	None
116	E20	CY A 11-16 T	RGB(142,56,142)			EGFR	RGB(0,0,255)	UNKNOWN	SYBR	None
117	E21	CY B 12-40 U	RGB(255,127,0)			EGFR	RGB(0,0,255)	UNKNOWN	SYBR	None
118	E22	CY A 11-14 U	RGB(198,113,113)			EGFR	RGB(0,0,255)	UNKNOWN	SYBR	None
119	E23	CY B 12-40 T	RGB(139,137,112)			EGFR	RGB(0,0,255)	UNKNOWN	SYBR	None
120	E24	CY A 11-14 T	RGB(0,245,255)			EGFR	RGB(0,0,255)	UNKNOWN	SYBR	None
121	F1	CY L 13-126 U	RGB(176,23,31)			EGFR	RGB(0,0,255)	UNKNOWN	SYBR	None
122	F2	CY L 11-30 U	RGB(0,245,255)			EGFR	RGB(0,0,255)	UNKNOWN	SYBR	None
123	F3	CY L 13-126 T	RGB(0,0,255)			EGFR	RGB(0,0,255)	UNKNOWN	SYBR	None
124	F4	CY L 11-30 T	RGB(238,220,130)			EGFR	RGB(0,0,255)	UNKNOWN	SYBR	None
125	F5	CY L 13-125 U	RGB(0,139,69)			EGFR	RGB(0,0,255)	UNKNOWN	SYBR	None
126	F6	CY D 13-55 U	RGB(238,238,0)			EGFR	RGB(0,0,255)	UNKNOWN	SYBR	None
127	F7	CY L 13-125 T	RGB(255,127,0)			EGFR	RGB(0,0,255)	UNKNOWN	SYBR	None
128	F8	CY D 13-55 T	RGB(142,142,56)			EGFR	RGB(0,0,255)	UNKNOWN	SYBR	None
129	F9	CY L 13-124 U	RGB(139,137,112)			EGFR	RGB(0,0,255)	UNKNOWN	SYBR	None
130	F10	CY D 11-29 U	RGB(238,44,44)			EGFR	RGB(0,0,255)	UNKNOWN	SYBR	None
131	F11	CY L 13-124 T	RGB(238,121,66)			EGFR	RGB(0,0,255)	UNKNOWN	SYBR	None
132	F12	CY D 11-29 T	RGB(51,161,201)			EGFR	RGB(0,0,255)	UNKNOWN	SYBR	None
133	F13	CY L 11-38 U	RGB(142,56,142)			EGFR	RGB(0,0,255)	UNKNOWN	SYBR	None
134	F14	CY D 11-18 U	RGB(238,18,137)			EGFR	RGB(0,0,255)	UNKNOWN	SYBR	None
135	F15	CY L 11-38 T	RGB(198,113,113)			EGFR	RGB(0,0,255)	UNKNOWN	SYBR	None
136	F16	CY D 11-18 T	RGB(176,23,31)			EGFR	RGB(0,0,255)	UNKNOWN	SYBR	None
137	F17	CY B 13-68 U	RGB(0,0,255)			EGFR	RGB(0,0,255)	UNKNOWN	SYBR	None
138	F18	CY A 11-16 U	RGB(238,121,66)			EGFR	RGB(0,0,255)	UNKNOWN	SYBR	None
139	F19	CY B 13-68 T	RGB(0,139,69)			EGFR	RGB(0,0,255)	UNKNOWN	SYBR	None
140	F20	CY A 11-16 T	RGB(142,56,142)			EGFR	RGB(0,0,255)	UNKNOWN	SYBR	None
141	F21	CY B 12-40 U	RGB(255,127,0)			EGFR	RGB(0,0,255)	UNKNOWN	SYBR	None
142	F22	CY A 11-14 U	RGB(198,113,113)			EGFR	RGB(0,0,255)	UNKNOWN	SYBR	None
143	F23	CY B 12-40 T	RGB(139,137,112)			EGFR	RGB(0,0,255)	UNKNOWN	SYBR	None
144	F24	CY A 11-14 T	RGB(0,245,255)			EGFR	RGB(0,0,255)	UNKNOWN	SYBR	None
145	G1	CY L 13-126 U	RGB(176,23,31)			ERBB2	RGB(0,139,69)	UNKNOWN	SYBR	None
146	G2	CY L 11-30 U	RGB(0,245,255)			ERBB2	RGB(0,139,69)	UNKNOWN	SYBR	None
147	G3	CY L 13-126 T	RGB(0,0,255)			ERBB2	RGB(0,139,69)	UNKNOWN	SYBR	None
148	G4	CY L 11-30 T	RGB(238,220,130)			ERBB2	RGB(0,139,69)	UNKNOWN	SYBR	None
149	G5	CY L 13-125 U	RGB(0,139,69)			ERBB2	RGB(0,139,69)	UNKNOWN	SYBR	None
150	G6	CY D 13-55 U	RGB(238,238,0)			ERBB2	RGB(0,139,69)	UNKNOWN	SYBR	None
151	G7	CY L 13-125 T	RGB(255,127,0)			ERBB2	RGB(0,139,69)	UNKNOWN	SYBR	None
152	G8	CY D 13-55 T	RGB(142,142,56)			ERBB2	RGB(0,139,69)	UNKNOWN	SYBR	None
153	G9	CY L 13-124 U	RGB(139,137,112)			ERBB2	RGB(0,139,69)	UNKNOWN	SYBR	None
154	G10	CY D 11-29 U	RGB(238,44,44)			ERBB2	RGB(0,139,69)	UNKNOWN	SYBR	None
155	G11	CY L 13-124 T	RGB(238,121,66)			ERBB2	RGB(0,139,69)	UNKNOWN	SYBR	None
156	G12	CY D 11-29 T	RGB(51,161,201)			ERBB2	RGB(0,139,69)	UNKNOWN	SYBR	None
157	G13	CY L 11-38 U	RGB(142,56,142)			ERBB2	RGB(0,139,69)	UNKNOWN	SYBR	None
158	G14	CY D 11-18 U	RGB(238,18,137)			ERBB2	RGB(0,139,69)	UNKNOWN	SYBR	None
159	G15	CY L 11-38 T	RGB(198,113,113)			ERBB2	RGB(0,139,69)	UNKNOWN	SYBR	None
160	G16	CY D 11-18 T	RGB(176,23,31)			ERBB2	RGB(0,139,69)	UNKNOWN	SYBR	None
161	G17	CY B 13-68 U	RGB(0,0,255)			ERBB2	RGB(0,139,69)	UNKNOWN	SYBR	None
162	G18	CY A 11-16 U	RGB(238,121,66)			ERBB2	RGB(0,139,69)	UNKNOWN	SYBR	None
163	G19	CY B 13-68 T	RGB(0,139,69)			ERBB2	RGB(0,139,69)	UNKNOWN	SYBR	None
164	G20	CY A 11-16 T	RGB(142,56,142)			ERBB2	RGB(0,139,69)	UNKNOWN	SYBR	None
165	G21	CY B 12-40 U	RGB(255,127,0)			ERBB2	RGB(0,139,69)	UNKNOWN	SYBR	None
166	G22	CY A 11-14 U	RGB(198,113,113)			ERBB2	RGB(0,139,69)	UNKNOWN	SYBR	None
167	G23	CY B 12-40 T	RGB(139,137,112)			ERBB2	RGB(0,139,69)	UNKNOWN	SYBR	None
168	G24	CY A 11-14 T	RGB(0,245,255)			ERBB2	RGB(0,139,69)	UNKNOWN	SYBR	None
169	H1	CY L 13-126 U	RGB(176,23,31)			ERBB2	RGB(0,139,69)	UNKNOWN	SYBR	None
170	H2	CY L 11-30 U	RGB(0,245,255)			ERBB2	RGB(0,139,69)	UNKNOWN	SYBR	None
171	H3	CY L 13-126 T	RGB(0,0,255)			ERBB2	RGB(0,139,69)	UNKNOWN	SYBR	None
172	H4	CY L 11-30 T	RGB(238,220,130)			ERBB2	RGB(0,139,69)	UNKNOWN	SYBR	None
173	H5	CY L 13-125 U	RGB(0,139,69)			ERBB2	RGB(0,139,69)	UNKNOWN	SYBR	None
174	H6	CY D 13-55 U	RGB(238,238,0)			ERBB2	RGB(0,139,69)	UNKNOWN	SYBR	None
175	H7	CY L 13-125 T	RGB(255,127,0)			ERBB2	RGB(0,139,69)	UNKNOWN	SYBR	None
176	H8	CY D 13-55 T	RGB(142,142,56)			ERBB2	RGB(0,139,69)	UNKNOWN	SYBR	None
177	H9	CY L 13-124 U	RGB(139,137,112)			ERBB2	RGB(0,139,69)	UNKNOWN	SYBR	None
178	H10	CY D 11-29 U	RGB(238,44,44)			ERBB2	RGB(0,139,69)	UNKNOWN	SYBR	None
179	H11	CY L 13-124 T	RGB(238,121,66)			ERBB2	RGB(0,139,69)	UNKNOWN	SYBR	None
180	H12	CY D 11-29 T	RGB(51,161,201)			ERBB2	RGB(0,139,69)	UNKNOWN	SYBR	None
181	H13	CY L 11-38 U	RGB(142,56,142)			ERBB2	RGB(0,139,69)	UNKNOWN	SYBR	None
182	H14	CY D 11-18 U	RGB(238,18,137)			ERBB2	RGB(0,139,69)	UNKNOWN	SYBR	None
183	H15	CY L 11-38 T	RGB(198,113,113)			ERBB2	RGB(0,139,69)	UNKNOWN	SYBR	None
184	H16	CY D 11-18 T	RGB(176,23,31)			ERBB2	RGB(0,139,69)	UNKNOWN	SYBR	None
185	H17	CY B 13-68 U	RGB(0,0,255)			ERBB2	RGB(0,139,69)	UNKNOWN	SYBR	None
186	H18	CY A 11-16 U	RGB(238,121,66)			ERBB2	RGB(0,139,69)	UNKNOWN	SYBR	None
187	H19	CY B 13-68 T	RGB(0,139,69)			ERBB2	RGB(0,139,69)	UNKNOWN	SYBR	None
188	H20	CY A 11-16 T	RGB(142,56,142)			ERBB2	RGB(0,139,69)	UNKNOWN	SYBR	None
189	H21	CY B 12-40 U	RGB(255,127,0)			ERBB2	RGB(0,139,69)	UNKNOWN	SYBR	None
190	H22	CY A 11-14 U	RGB(198,113,113)			ERBB2	RGB(0,139,69)	UNKNOWN	SYBR	None
191	H23	CY B 12-40 T	RGB(139,137,112)			ERBB2	RGB(0,139,69)	UNKNOWN	SYBR	None
192	H24	CY A 11-14 T	RGB(0,245,255)			ERBB2	RGB(0,139,69)	UNKNOWN	SYBR	None
193	I1	CY L 13-126 U	RGB(176,23,31)			ERBB2	RGB(0,139,69)	UNKNOWN	SYBR	None
194	I2	CY L 11-30 U	RGB(0,245,255)			ERBB2	RGB(0,139,69)	UNKNOWN	SYBR	None
195	I3	CY L 13-126 T	RGB(0,0,255)			ERBB2	RGB(0,139,69)	UNKNOWN	SYBR	None
196	I4	CY L 11-30 T	RGB(238,220,130)			ERBB2	RGB(0,139,69)	UNKNOWN	SYBR	None
197	I5	CY L 13-125 U	RGB(0,139,69)			ERBB2	RGB(0,139,69)	UNKNOWN	SYBR	None
198	I6	CY D 13-55 U	RGB(238,238,0)			ERBB2	RGB(0,139,69)	UNKNOWN	SYBR	None
199	I7	CY L 13-125 T	RGB(255,127,0)			ERBB2	RGB(0,139,69)	UNKNOWN	SYBR	None
200	I8	CY D 13-55 T	RGB(142,142,56)			ERBB2	RGB(0,139,69)	UNKNOWN	SYBR	None
201	I9	CY L 13-124 U	RGB(139,137,112)			ERBB2	RGB(0,139,69)	UNKNOWN	SYBR	None
202	I10	CY D 11-29 U	RGB(238,44,44)			ERBB2	RGB(0,139,69)	UNKNOWN	SYBR	None
203	I11	CY L 13-124 T	RGB(238,121,66)			ERBB2	RGB(0,139,69)	UNKNOWN	SYBR	None
204	I12	CY D 11-29 T	RGB(51,161,201)			ERBB2	RGB(0,139,69)	UNKNOWN	SYBR	None
205	I13	CY L 11-38 U	RGB(142,56,142)			ERBB2	RGB(0,139,69)	UNKNOWN	SYBR	None
206	I14	CY D 11-18 U	RGB(238,18,137)			ERBB2	RGB(0,139,69)	UNKNOWN	SYBR	None
207	I15	CY L 11-38 T	RGB(198,113,113)			ERBB2	RGB(0,139,69)	UNKNOWN	SYBR	None
208	I16	CY D 11-18 T	RGB(176,23,31)			ERBB2	RGB(0,139,69)	UNKNOWN	SYBR	None
209	I17	CY B 13-68 U	RGB(0,0,255)			ERBB2	RGB(0,139,69)	UNKNOWN	SYBR	None
210	I18	CY A 11-16 U	RGB(238,121,66)			ERBB2	RGB(0,139,69)	UNKNOWN	SYBR	None
211	I19	CY B 13-68 T	RGB(0,139,69)			ERBB2	RGB(0,139,69)	UNKNOWN	SYBR	None
212	I20	CY A 11-16 T	RGB(142,56,142)			ERBB2	RGB(0,139,69)	UNKNOWN	SYBR	None
213	I21	CY B 12-40 U	RGB(255,127,0)			ERBB2	RGB(0,139,69)	UNKNOWN	SYBR	None
214	I22	CY A 11-14 U	RGB(198,113,113)			ERBB2	RGB(0,139,69)	UNKNOWN	SYBR	None
215	I23	CY B 12-40 T	RGB(139,137,112)			ERBB2	RGB(0,139,69)	UNKNOWN	SYBR	None
216	I24	CY A 11-14 T	RGB(0,245,255)			ERBB2	RGB(0,139,69)	UNKNOWN	SYBR	None
217	J1
218	J2
219	J3
220	J4
221	J5
222	J6
223	J7
224	J8
225	J9
226	J10
227	J11
228	J12
229	J13
230	J14
231	J15
232	J16
233	J17
234	J18
235	J19
236	J20
237	J21
238	J22
239	J23
240	J24
241	K1
242	K2
243	K3
244	K4
245	K5
246	K6
247	K7
248	K8
249	K9
250	K10
251	K11
252	K12
253	K13
254	K14
255	K15
256	K16
257	K17
258	K18
259	K19
260	K20
261	K21
262	K22
263	K23
264	K24
265	L1
266	L2
267	L3
268	L4
269	L5
270	L6
271	L7
272	L8
273	L9
274	L10
275	L11
276	L12
277	L13
278	L14
279	L15
280	L16
281	L17
282	L18
283	L19
284	L20
285	L21
286	L22
287	L23
288	L24
289	M1
290	M2
291	M3
292	M4
293	M5
294	M6
295	M7
296	M8
297	M9
298	M10
299	M11
300	M12
301	M13
302	M14
303	M15
304	M16
305	M17
306	M18
307	M19
308	M20
309	M21
310	M22
311	M23
312	M24
313	N1
314	N2
315	N3
316	N4
317	N5
318	N6
319	N7
320	N8
321	N9
322	N10
323	N11
324	N12
325	N13
326	N14
327	N15
328	N16
329	N17
330	N18
331	N19
332	N20
333	N21
334	N22
335	N23
336	N24
337	O1
338	O2
339	O3
340	O4
341	O5
342	O6
343	O7
344	O8
345	O9
346	O10
347	O11
348	O12
349	O13
350	O14
351	O15
352	O16
353	O17
354	O18
355	O19
356	O20
357	O21
358	O22
359	O23
360	O24
361	P1
362	P2
363	P3
364	P4
365	P5
366	P6
367	P7
368	P8
369	P9
370	P10
371	P11
372	P12
373	P13
374	P14
375	P15
376	P16
377	P17
378	P18
379	P19
380	P20
381	P21
382	P22					ERBB2	RGB(0,139,69)	NTC	SYBR	None
383	P23					EGFR	RGB(0,0,255)	NTC	SYBR	None
384	P24					HPRT1	RGB(176,23,31)	NTC	SYBR	None

## Sheet: Amplification Data
Block Type	384-Well Block
Calibration Background is expired	No
Calibration Background performed on	2016-02-12 13:07:10 PM PST
Calibration FAM is expired	Yes
Calibration FAM performed on	2016-02-12 14:10:50 PM PST
Calibration NED is expired	Yes
Calibration NED performed on	2014-11-24 13:16:28 PM PST
Calibration ROI is expired	No
Calibration ROI performed on	2016-02-12 12:57:08 PM PST
Calibration ROX is expired	Yes
Calibration ROX performed on	2016-02-12 14:26:17 PM PST
Calibration SYBR is expired	Yes
Calibration SYBR performed on	2016-02-12 14:49:42 PM PST
Calibration TAMRA is expired	Yes
Calibration TAMRA performed on	2016-02-12 14:38:45 PM PST
Calibration Uniformity is expired	No
Calibration Uniformity performed on	2016-02-12 13:16:49 PM PST
Calibration VIC is expired	Yes
Calibration VIC performed on	2016-02-12 14:01:38 PM PST
Chemistry	SYBR_GREEN
Experiment Barcode
Experiment Comments
Experiment File Name	F:\2016-11-28 102413 EGFR ERBB2 HPRT1 BALD.eds
Experiment Name	2016-11-28 102413 EGFR ERBB2 HPRT1 BALD
Experiment Run Start Time	2016-11-28 11:20:14 AM PST
Experiment Run Stop Time	2016-11-28 13:07:44 PM PST
Experiment Type	Comparative Cт (ΔΔCт)
Experiment User Name	SHARI
Instrument Name	278880281
Instrument Serial Number	278880281
Instrument Type	ViiA(TM) 7 System
Passive Reference	ROX
Quantification Cycle Method	Ct
Signal Smoothing On	true
Stage/ Cycle where Analysis is performed	Stage 2, Step 2
Well	Cycle	Target Name	Rn	Delta Rn
1	1	HPRT1	0.537961	-0.0319726
1	2	HPRT1	0.556661	-0.0251646
1	3	HPRT1	0.588674	-0.00504306
1	4	HPRT1	0.605527	-8.21772e-05
1	5	HPRT1	0.617482	-1.87727e-05
1	6	HPRT1	0.635429	0.00603663
1	7	HPRT1	0.64401	0.00272623
1	8	HPRT1	0.656988	0.00381317
1	9	HPRT1	0.669614	0.00454748
1	10	HPRT1	0.676877	-8.15508e-05
1	11	HPRT1	0.680884	-0.00796589
1	12	HPRT1	0.694759	-0.00598226
1	13	HPRT1	0.704535	-0.00809759
1	14	HPRT1	0.726334	0.00180976
1	15	HPRT1	0.740849	0.00443337
1	16	HPRT1	0.752212	0.00390466
1	17	HPRT1	0.768383	0.00818348
1	18	HPRT1	0.813152	0.0410616
1	19	HPRT1	0.879413	0.0954306
1	20	HPRT1	0.995933	0.20006
1	21	HPRT1	1.2019	0.394133
1	22	HPRT1	1.56892	0.749259
1	23	HPRT1	2.11734	1.2858
1	24	HPRT1	2.79845	1.95501
1	25	HPRT1	3.48762	2.63229
1	26	HPRT1	4.09369	3.22646
1	27	HPRT1	4.62392	3.74481
1	28	HPRT1	5.03493	4.14392
1	29	HPRT1	5.41396	4.51106
1	30	HPRT1	5.72071	4.80592
1	31	HPRT1	5.9518	5.02512
1	32	HPRT1	6.19004	5.25147
1	33	HPRT1	6.40035	5.44988
1	34	HPRT1	6.52397	5.56162
1	35	HPRT1	6.64059	5.66634
1	36	HPRT1	6.76132	5.77518
1	37	HPRT1	6.87687	5.87884
1	38	HPRT1	6.95471	5.94479
1	39	HPRT1	7.04505	6.02324
1	40	HPRT1	7.11961	6.0859
2	1	HPRT1	0.989194	-0.0428081
2	2	HPRT1	1.01943	-0.0471036
2	3	HPRT1	1.06899	-0.0320692
2	4	HPRT1	1.11545	-0.0201357
2	5	HPRT1	1.16486	-0.00524644
2	6	HPRT1	1.21317	0.00853396
2	7	HPRT1	1.2571	0.0179353
2	8	HPRT1	1.29588	0.0221852
2	9	HPRT1	1.32803	0.0198157
2	10	HPRT1	1.35463	0.0118836
2	11	HPRT1	1.39298	0.0157029
2	12	HPRT1	1.42206	0.0102585
2	13	HPRT1	1.44388	-0.00244142
2	14	HPRT1	1.47379	-0.00706359
2	15	HPRT1	1.49927	-0.0161081
2	16	HPRT1	1.52666	-0.0232507
2	17	HPRT1	1.56604	-0.0183935
2	18	HPRT1	1.62943	0.0104735
2	19	HPRT1	1.71186	0.0583746
2	20	HPRT1	1.85612	0.168108
2	21	HPRT1	2.11408	0.391533
2	22	HPRT1	2.54071	0.783644
2	23	HPRT1	3.12559	1.33399
2	24	HPRT1	3.72443	1.8983
2	25	HPRT1	4.27732	2.41667
2	26	HPRT1	4.77005	2.87488
2	27	HPRT1	5.21774	3.28804
2	28	HPRT1	5.60256	3.63833
2	29	HPRT1	5.90434	3.90558
2	30	HPRT1	6.16354	4.13026
2	31	HPRT1	6.36209	4.29428
2	32	HPRT1	6.5697	4.46736
2	33	HPRT1	6.73818	4.60132
2	34	HPRT1	6.86188	4.69048
2	35	HPRT1	6.99005	4.78413
2	36	HPRT1	7.08979	4.84934
2	37	HPRT1	7.18767	4.9127
2	38	HPRT1	7.2879	4.9784
2	39	HPRT1	7.38807	5.04404
2	40	HPRT1	7.48002	5.10147
3	1	HPRT1	0.725882	-0.00686145
3	2	HPRT1	0.739987	-0.00581665
3	3	HPRT1	0.757679	-0.00118407
3	4	HPRT1	0.772508	0.000585104
3	5	HPRT1	0.783127	-0.00185536
3	6	HPRT1	0.797283	-0.000759303
3	7	HPRT1	0.811185	8.28388e-05
3	8	HPRT1	0.828564	0.00440249
3	9	HPRT1	0.841107	0.00388511
3	10	HPRT1	0.849106	-0.00117557
3	11	HPRT1	0.864275	0.000934243
3	12	HPRT1	0.870986	-0.00541486
3	13	HPRT1	0.885715	-0.00374475
3	14	HPRT1	0.906764	0.00424411
3	15	HPRT1	0.921895	0.0063156
3	16	HPRT1	0.947749	0.0191101
3	17	HPRT1	0.976419	0.03472
3	18	HPRT1	1.02476	0.0700002
3	19	HPRT1	1.09979	0.131975
3	20	HPRT1	1.21787	0.236987
3	21	HPRT1	1.4373	0.443363
3	22	HPRT1	1.81438	0.807381
3	23	HPRT1	2.38113	1.36107
3	24	HPRT1	3.06589	2.03277
3	25	HPRT1	3.7688	2.72262
3	26	HPRT1	4.38245	3.32322
3	27	HPRT1	4.91163	3.83933
3	28	HPRT1	5.36741	4.28206
3	29	HPRT1	5.75665	4.65824
3	30	HPRT1	6.05957	4.94809
3	31	HPRT1	6.32899	5.20445
3	32	HPRT1	6.56292	5.42533
3	33	HPRT1	6.75684	5.60618
3	34	HPRT1	6.91131	5.7476
3	35	HPRT1	7.00883	5.83205
3	36	HPRT1	7.1376	5.94777
3	37	HPRT1	7.26294	6.06005
3	38	HPRT1	7.34985	6.1339
3	39	HPRT1	7.44838	6.21937
3	40	HPRT1	7.52742	6.28535
4	1	HPRT1	0.911644	-0.00155381
4	2	HPRT1	0.934209	0.0133315
4	3	HPRT1	0.937622	0.00906506
4	4	HPRT1	0.938027	0.00178972
4	5	HPRT1	0.943111	-0.000806126
4	6	HPRT1	0.950405	-0.00119153
4	7	HPRT1	0.951777	-0.00749961
4	8	HPRT1	0.953383	-0.0135735
4	9	HPRT1	0.968754	-0.0058814
4	10	HPRT1	0.990543	0.00822767
4	11	HPRT1	0.999865	0.00986972
4	12	HPRT1	1.03264	0.0349675
4	13	HPRT1	1.06277	0.0574197
4	14	HPRT1	1.09915	0.0861177
4	15	HPRT1	1.13303	0.112315
4	16	HPRT1	1.18521	0.156817
4	17	HPRT1	1.26697	0.230894
4	18	HPRT1	1.38389	0.340138
4	19	HPRT1	1.58326	0.531827
4	20	HPRT1	1.90559	0.84648
4	21	HPRT1	2.41648	1.34969
4	22	HPRT1	3.04049	1.96602
4	23	HPRT1	3.70599	2.62384
4	24	HPRT1	4.30958	3.21975
4	25	HPRT1	4.8735	3.77599
4	26	HPRT1	5.37158	4.26639
4	27	HPRT1	5.75662	4.64375
4	28	HPRT1	6.07882	4.95827
4	29	HPRT1	6.32844	5.20021
4	30	HPRT1	6.57217	5.43626
4	31	HPRT1	6.77439	5.6308
4	32	HPRT1	6.94226	5.79099
4	33	HPRT1	7.11871	5.95976
4	34	HPRT1	7.248	6.08137
4	35	HPRT1	7.32036	6.14605
4	36	HPRT1	7.44821	6.26623
4	37	HPRT1	7.52725	6.33758
4	38	HPRT1	7.56572	6.36837
4	39	HPRT1	7.65345	6.44842
4	40	HPRT1	7.72457	6.51186
5	1	HPRT1	1.07831	-0.0468285
5	2	HPRT1	1.10654	-0.039351
5	3	HPRT1	1.16134	-0.00530784
5	4	HPRT1	1.18599	-0.00141627
5	5	HPRT1	1.20221	-0.00595304
5	6	HPRT1	1.22988	0.000969661
5	7	HPRT1	1.25116	0.00148999
5	8	HPRT1	1.2764	0.00597522
5	9	HPRT1	1.30112	0.00994463
5	10	HPRT1	1.31877	0.00683563
5	11	HPRT1	1.33166	-0.00102409
5	12	HPRT1	1.34982	-0.00362633
5	13	HPRT1	1.37357	-0.000629788
5	14	HPRT1	1.39367	-0.00128093
5	15	HPRT1	1.40973	-0.00597684
5	16	HPRT1	1.43299	-0.00347001
5	17	HPRT1	1.47514	0.0179233
5	18	HPRT1	1.5332	0.0552247
5	19	HPRT1	1.62344	0.124718
5	20	HPRT1	1.78418	0.264696
5	21	HPRT1	2.07175	0.53151
5	22	HPRT1	2.53633	0.975334
5	23	HPRT1	3.17356	1.59182
5	24	HPRT1	3.87033	2.26783
5	25	HPRT1	4.51197	2.88871
5	26	HPRT1	5.08741	3.4434
5	27	HPRT1	5.58785	3.92309
5	28	HPRT1	5.97494	4.28942
5	29	HPRT1	6.31946	4.61319
5	30	HPRT1	6.59783	4.8708
5	31	HPRT1	6.82031	5.07253
5	32	HPRT1	7.02905	5.26051
5	33	HPRT1	7.23018	5.44088
5	34	HPRT1	7.39614	5.58609
5	35	HPRT1	7.51636	5.68556
5	36	HPRT1	7.62958	5.77803
5	37	HPRT1	7.70419	5.83188
5	38	HPRT1	7.83863	5.94556
5	39	HPRT1	7.92078	6.00695
5	40	HPRT1	7.96922	6.03464
6	1	HPRT1	0.9317	-0.0128066
6	2	HPRT1	0.956545	-0.00598955
6	3	HPRT1	0.979822	-0.000740506
6	4	HPRT1	1.0016	0.00300811
6	5	HPRT1	1.01771	0.00109531
6	6	HPRT1	1.02748	-0.00716254
6	7	HPRT1	1.05387	0.00119477
6	8	HPRT1	1.07184	0.0011427
6	9	HPRT1	1.08925	0.000522243
6	10	HPRT1	1.10552	-0.00123381
6	11	HPRT1	1.12861	0.00382451
6	12	HPRT1	1.14458	0.0017634
6	13	HPRT1	1.15845	-0.00238899
6	14	HPRT1	1.17784	-0.00102521
6	15	HPRT1	1.20239	0.00548972
6	16	HPRT1	1.2341	0.0191751
6	17	HPRT1	1.27793	0.0449812
6	18	HPRT1	1.34766	0.0966805
6	19	HPRT1	1.46543	0.196422
6	20	HPRT1	1.67422	0.387186
6	21	HPRT1	2.05673	0.751671
6	22	HPRT1	2.66392	1.34083
6	23	HPRT1	3.45589	2.11477
6	24	HPRT1	4.26424	2.90509
6	25	HPRT1	5.00131	3.62413
6	26	HPRT1	5.66742	4.27222
6	27	HPRT1	6.24036	4.82713
6	28	HPRT1	6.69305	5.26179
6	29	HPRT1	7.07944	5.63015
6	30	HPRT1	7.43956	5.97225
6	31	HPRT1	7.68547	6.20013
6	32	HPRT1	7.89969	6.39632
6	33	HPRT1	8.12137	6.59997
6	34	HPRT1	8.30307	6.76364
6	35	HPRT1	8.45457	6.89711
6	36	HPRT1	8.62467	7.04919
6	37	HPRT1	8.74602	7.15251
6	38	HPRT1	8.8636	7.25206
6	39	HPRT1	8.96905	7.33948
6	40	HPRT1	9.0208	7.37321
7	1	HPRT1	0.614562	-0.0317045
7	2	HPRT1	0.639954	-0.0245051
7	3	HPRT1	0.676309	-0.00634323
7	4	HPRT1	0.698976	-0.00186956
7	5	HPRT1	0.715932	-0.00310715
7	6	HPRT1	0.739339	0.00210687
7	7	HPRT1	0.760259	0.00483389
7	8	HPRT1	0.778627	0.00500888
7	9	HPRT1	0.794765	0.00295358
7	10	HPRT1	0.810354	0.000349911
7	11	HPRT1	0.82978	0.0015827
7	12	HPRT1	0.851374	0.00498325
7	13	HPRT1	0.865057	0.000473428
7	14	HPRT1	0.876139	-0.00663814
7	15	HPRT1	0.896636	-0.00433443
7	16	HPRT1	0.92225	0.00308639
7	17	HPRT1	0.951007	0.0136508
7	18	HPRT1	0.996206	0.0406558
7	19	HPRT1	1.07442	0.100681
7	20	HPRT1	1.21591	0.223977
7	21	HPRT1	1.45898	0.448851
7	22	HPRT1	1.88994	0.861617
7	23	HPRT1	2.54863	1.50211
7	24	HPRT1	3.40019	2.33548
7	25	HPRT1	4.27507	3.19217
7	26	HPRT1	5.06229	3.96119
7	27	HPRT1	5.72165	4.60237
7	28	HPRT1	6.29272	5.15524
7	29	HPRT1	6.76715	5.61147
7	30	HPRT1	7.12555	5.95169
7	31	HPRT1	7.45288	6.26082
7	32	HPRT1	7.70161	6.49136
7	33	HPRT1	7.91667	6.68823
7	34	HPRT1	8.14207	6.89543
7	35	HPRT1	8.34115	7.07632
7	36	HPRT1	8.51871	7.23568
7	37	HPRT1	8.61707	7.31585
7	38	HPRT1	8.75289	7.43348
7	39	HPRT1	8.86613	7.52853
7	40	HPRT1	8.93734	7.58154
8	1	HPRT1	0.998778	0.00556459
8	2	HPRT1	1.01316	0.00222616
8	3	HPRT1	1.02327	-0.00538771
8	4	HPRT1	1.04126	-0.0051135
8	5	HPRT1	1.06834	0.00424065
8	6	HPRT1	1.09256	0.0107421
8	7	HPRT1	1.10629	0.00674481
8	8	HPRT1	1.11314	-0.00412752
8	9	HPRT1	1.13354	-0.00144994
8	10	HPRT1	1.14785	-0.00486061
8	11	HPRT1	1.16356	-0.00687295
8	12	HPRT1	1.19323	0.00507483
8	13	HPRT1	1.20688	0.00100982
8	14	HPRT1	1.23063	0.00703242
8	15	HPRT1	1.25796	0.0166449
8	16	HPRT1	1.28524	0.026204
8	17	HPRT1	1.32951	0.0527546
8	18	HPRT1	1.41392	0.119442
8	19	HPRT1	1.54726	0.235054
8	20	HPRT1	1.78128	0.451358
8	21	HPRT1	2.17445	0.826807
8	22	HPRT1	2.73966	1.37429
8	23	HPRT1	3.3839	2.00081
8	24	HPRT1	4.01622	2.61541
8	25	HPRT1	4.5639	3.14537
8	26	HPRT1	5.0371	3.60084
8	27	HPRT1	5.45477	4.0008
8	28	HPRT1	5.83471	4.36301
8	29	HPRT1	6.11568	4.62626
8	30	HPRT1	6.36643	4.85928
8	31	HPRT1	6.55725	5.03239
8	32	HPRT1	6.76583	5.22325
8	33	HPRT1	6.94026	5.37995
8	34	HPRT1	7.1112	5.53317
8	35	HPRT1	7.18483	5.58908
8	36	HPRT1	7.26074	5.64727
8	37	HPRT1	7.37382	5.74263
8	38	HPRT1	7.45839	5.80948
8	39	HPRT1	7.58115	5.91451
8	40	HPRT1	7.65768	5.97332
9	1	HPRT1	1.11507	-0.0731968
9	2	HPRT1	1.14671	-0.0658154
9	3	HPRT1	1.19772	-0.0390673
9	4	HPRT1	1.2439	-0.0171498
9	5	HPRT1	1.29251	0.00720351
9	6	HPRT1	1.33407	0.0245014
9	7	HPRT1	1.35243	0.0186053
9	8	HPRT1	1.37359	0.0155009
9	9	HPRT1	1.39388	0.0115376
9	10	HPRT1	1.41555	0.00894395
9	11	HPRT1	1.43534	0.00447205
9	12	HPRT1	1.45499	-0.000130388
9	13	HPRT1	1.47305	-0.006335
9	14	HPRT1	1.49243	-0.0112133
9	15	HPRT1	1.51104	-0.0168689
9	16	HPRT1	1.54344	-0.00872515
9	17	HPRT1	1.59908	0.0226604
9	18	HPRT1	1.6893	0.0886184
9	19	HPRT1	1.8444	0.219454
9	20	HPRT1	2.11251	0.463307
9	21	HPRT1	2.53359	0.860126
9	22	HPRT1	3.13348	1.43576
9	23	HPRT1	3.803	2.08101
9	24	HPRT1	4.43754	2.6913
9	25	HPRT1	4.99534	3.22484
9	26	HPRT1	5.47146	3.6767
9	27	HPRT1	5.88133	4.0623
9	28	HPRT1	6.19004	4.34675
9	29	HPRT1	6.50314	4.6356
9	30	HPRT1	6.73911	4.8473
9	31	HPRT1	6.95782	5.04175
9	32	HPRT1	7.146	5.20568
9	33	HPRT1	7.29567	5.33109
9	34	HPRT1	7.40856	5.41972
9	35	HPRT1	7.53531	5.52221
9	36	HPRT1	7.65871	5.62134
9	37	HPRT1	7.74915	5.68753
9	38	HPRT1	7.78664	5.70076
9	39	HPRT1	7.85337	5.74323
9	40	HPRT1	7.89695	5.76254
10	1	HPRT1	0.487973	0.0831998
10	2	HPRT1	0.487002	0.0703145
10	3	HPRT1	0.465136	0.0365337
10	4	HPRT1	0.464561	0.0240448
10	5	HPRT1	0.455389	0.00295736
10	6	HPRT1	0.448775	-0.015571
10	7	HPRT1	0.448743	-0.0275172
10	8	HPRT1	0.460421	-0.0277544
10	9	HPRT1	0.483105	-0.0169842
10	10	HPRT1	0.495727	-0.0162776
10	11	HPRT1	0.514774	-0.00914497
10	12	HPRT1	0.539876	0.00404298
10	13	HPRT1	0.555287	0.00753897
10	14	HPRT1	0.574415	0.0147523
10	15	HPRT1	0.594957	0.0233793
10	16	HPRT1	0.618822	0.0353306
10	17	HPRT1	0.654926	0.05952
10	18	HPRT1	0.686152	0.0788313
10	19	HPRT1	0.735549	0.116314
10	20	HPRT1	0.821461	0.190311
10	21	HPRT1	0.989361	0.346296
10	22	HPRT1	1.26901	0.614032
10	23	HPRT1	1.73726	1.07036
10	24	HPRT1	2.41615	1.73734
10	25	HPRT1	3.20818	2.51746
10	26	HPRT1	3.96154	3.2589
10	27	HPRT1	4.61633	3.90178
10	28	HPRT1	5.16522	4.43875
10	29	HPRT1	5.64843	4.91005
10	30	HPRT1	6.03535	5.28506
10	31	HPRT1	6.33737	5.57516
10	32	HPRT1	6.60224	5.82811
10	33	HPRT1	6.79783	6.01179
10	34	HPRT1	6.92356	6.1256
10	35	HPRT1	7.06207	6.2522
10	36	HPRT1	7.18567	6.36388
10	37	HPRT1	7.31499	6.48129
10	38	HPRT1	7.39586	6.55025
10	39	HPRT1	7.51457	6.65704
10	40	HPRT1	7.59997	6.73052
11	1	HPRT1	1.05275	-0.00819757
11	2	HPRT1	1.07185	-0.00476988
11	3	HPRT1	1.09051	-0.00176681
11	4	HPRT1	1.109	0.00105125
11	5	HPRT1	1.1231	-0.000518553
11	6	HPRT1	1.14232	0.00304099
11	7	HPRT1	1.15948	0.00453582
11	8	HPRT1	1.16933	-0.00128117
11	9	HPRT1	1.1808	-0.00547953
11	10	HPRT1	1.19948	-0.0024618
11	11	HPRT1	1.21755	-6.52667e-05
11	12	HPRT1	1.23957	0.00629033
11	13	HPRT1	1.2488	-0.000143093
11	14	HPRT1	1.25526	-0.0093461
11	15	HPRT1	1.28277	0.00248883
11	16	HPRT1	1.2996	0.00365512
11	17	HPRT1	1.31783	0.00621747
11	18	HPRT1	1.36243	0.0351506
11	19	HPRT1	1.43483	0.0918892
11	20	HPRT1	1.55071	0.192101
11	21	HPRT1	1.77736	0.403089
11	22	HPRT1	2.15199	0.762053
11	23	HPRT1	2.72103	1.31542
11	24	HPRT1	3.45396	2.03268
11	25	HPRT1	4.19017	2.75323
11	26	HPRT1	4.8359	3.38329
11	27	HPRT1	5.37022	3.90195
11	28	HPRT1	5.85618	4.37224
11	29	HPRT1	6.26461	4.76501
11	30	HPRT1	6.56805	5.05278
11	31	HPRT1	6.82047	5.28953
11	32	HPRT1	7.05685	5.51025
11	33	HPRT1	7.26934	5.70707
11	34	HPRT1	7.45936	5.88143
11	35	HPRT1	7.57211	5.9785
11	36	HPRT1	7.66954	6.06028
11	37	HPRT1	7.80072	6.17579
11	38	HPRT1	7.87392	6.23332
11	39	HPRT1	7.9674	6.31113
11	40	HPRT1	8.06843	6.39649
12	1	HPRT1	1.05469	-0.0290555
12	2	HPRT1	1.07736	-0.0260051
12	3	HPRT1	1.11011	-0.0128777
12	4	HPRT1	1.13403	-0.00858359
12	5	HPRT1	1.163	0.000765832
12	6	HPRT1	1.18757	0.00571321
12	7	HPRT1	1.20538	0.00389784
12	8	HPRT1	1.22638	0.00527371
12	9	HPRT1	1.2497	0.00897476
12	10	HPRT1	1.26972	0.00937621
12	11	HPRT1	1.28497	0.00499927
12	12	HPRT1	1.30078	0.00118906
12	13	HPRT1	1.31601	-0.00320778
12	14	HPRT1	1.33025	-0.00858262
12	15	HPRT1	1.35859	0.000127483
12	16	HPRT1	1.37643	-0.00165117
12	17	HPRT1	1.39229	-0.00541453
12	18	HPRT1	1.42796	0.0106339
12	19	HPRT1	1.50266	0.0657077
12	20	HPRT1	1.62025	0.163681
12	21	HPRT1	1.83407	0.357881
12	22	HPRT1	2.19105	0.695234
12	23	HPRT1	2.73079	1.21535
12	24	HPRT1	3.39129	1.85623
12	25	HPRT1	4.03261	2.47792
12	26	HPRT1	4.61881	3.0445
12	27	HPRT1	5.14397	3.55004
12	28	HPRT1	5.58837	3.97481
12	29	HPRT1	5.95831	4.32514
12	30	HPRT1	6.27002	4.61723
12	31	HPRT1	6.52627	4.85385
12	32	HPRT1	6.73132	5.03928
12	33	HPRT1	6.92921	5.21755
12	34	HPRT1	7.06099	5.3297
12	35	HPRT1	7.20938	5.45847
12	36	HPRT1	7.35217	5.58163
12	37	HPRT1	7.47054	5.68038
12	38	HPRT1	7.59649	5.78671
12	39	HPRT1	7.66389	5.83449
12	40	HPRT1	7.71477	5.86574
13	1	HPRT1	0.966689	-0.0501462
13	2	HPRT1	0.997701	-0.038832
13	3	HPRT1	1.04341	-0.0128194
13	4	HPRT1	1.07042	-0.00550982
13	5	HPRT1	1.09369	-0.00193503
13	6	HPRT1	1.11686	0.00153199
13	7	HPRT1	1.13783	0.00280627
13	8	HPRT1	1.16647	0.0117485
13	9	HPRT1	1.18367	0.00925346
13	10	HPRT1	1.20244	0.00833025
13	11	HPRT1	1.22196	0.00815077
13	12	HPRT1	1.23111	-0.00239836
13	13	HPRT1	1.24962	-0.00358503
13	14	HPRT1	1.26791	-0.00499212
13	15	HPRT1	1.28692	-0.00568502
13	16	HPRT1	1.3074	-0.0048964
13	17	HPRT1	1.3375	0.00550145
13	18	HPRT1	1.37802	0.0263264
13	19	HPRT1	1.44334	0.071952
13	20	HPRT1	1.56161	0.170518
13	21	HPRT1	1.77314	0.362355
13	22	HPRT1	2.12922	0.698736
13	23	HPRT1	2.67058	1.2204
13	24	HPRT1	3.33064	1.86076
13	25	HPRT1	3.98304	2.49346
13	26	HPRT1	4.55634	3.04707
13	27	HPRT1	5.06973	3.54075
13	28	HPRT1	5.49496	3.94629
13	29	HPRT1	5.83864	4.27027
13	30	HPRT1	6.12003	4.53197
13	31	HPRT1	6.34331	4.73555
13	32	HPRT1	6.5826	4.95514
13	33	HPRT1	6.77778	5.13062
13	34	HPRT1	6.91901	5.25215
13	35	HPRT1	7.05666	5.37011
13	36	HPRT1	7.17593	5.46968
13	37	HPRT1	7.30826	5.58231
13	38	HPRT1	7.40264	5.657
13	39	HPRT1	7.45703	5.69168
13	40	HPRT1	7.49809	5.71305
14	1	HPRT1	1.47884	-0.0403233
14	2	HPRT1	1.51713	-0.0274322
14	3	HPRT1	1.56336	-0.00659795
14	4	HPRT1	1.5898	-0.00555588
14	5	HPRT1	1.62339	0.00264316
14	6	HPRT1	1.65156	0.00541663
14	7	HPRT1	1.67536	0.0038156
14	8	HPRT1	1.69207	-0.00486992
14	9	HPRT1	1.71983	-0.00251321
14	10	HPRT1	1.74712	-0.000620216
14	11	HPRT1	1.7837	0.0105711
14	12	HPRT1	1.81747	0.0189448
14	13	HPRT1	1.82336	-0.000570546
14	14	HPRT1	1.8382	-0.011124
14	15	HPRT1	1.86518	-0.0095396
14	16	HPRT1	1.89776	-0.00236206
14	17	HPRT1	1.94447	0.0189545
14	18	HPRT1	2.00991	0.0589941
14	19	HPRT1	2.10989	0.133584
14	20	HPRT1	2.28009	0.27838
14	21	HPRT1	2.59393	0.566828
14	22	HPRT1	3.06769	1.01519
14	23	HPRT1	3.6823	1.6044
14	24	HPRT1	4.30251	2.19921
14	25	HPRT1	4.87814	2.74945
14	26	HPRT1	5.38115	3.22706
14	27	HPRT1	5.83412	3.65464
14	28	HPRT1	6.22515	4.02026
14	29	HPRT1	6.54775	4.31747
14	30	HPRT1	6.80131	4.54563
14	31	HPRT1	7.04049	4.75942
14	32	HPRT1	7.24577	4.9393
14	33	HPRT1	7.41032	5.07845
14	34	HPRT1	7.54351	5.18625
14	35	HPRT1	7.67824	5.29558
14	36	HPRT1	7.789	5.38094
14	37	HPRT1	7.88613	5.45268
14	38	HPRT1	7.98784	5.52899
14	39	HPRT1	8.06625	5.582
14	40	HPRT1	8.12051	5.61086
15	1	HPRT1	1.0948	-0.0366752
15	2	HPRT1	1.11509	-0.0434857
15	3	HPRT1	1.158	-0.0276773
15	4	HPRT1	1.19412	-0.0186585
15	5	HPRT1	1.23412	-0.00576264
15	6	HPRT1	1.27867	0.0116896
15	7	HPRT1	1.31539	0.0213105
15	8	HPRT1	1.33616	0.0149801
15	9	HPRT1	1.36357	0.0152876
15	10	HPRT1	1.38762	0.0122362
15	11	HPRT1	1.40812	0.00563582
15	12	HPRT1	1.43472	0.00514147
15	13	HPRT1	1.46165	0.00496313
15	14	HPRT1	1.47858	-0.00520136
15	15	HPRT1	1.49579	-0.0150988
15	16	HPRT1	1.51914	-0.0188459
15	17	HPRT1	1.5542	-0.0108849
15	18	HPRT1	1.596	0.00380945
15	19	HPRT1	1.67369	0.0543999
15	20	HPRT1	1.80811	0.161716
15	21	HPRT1	2.0395	0.366013
15	22	HPRT1	2.4195	0.718913
15	23	HPRT1	2.98976	1.26207
15	24	HPRT1	3.67652	1.92173
15	25	HPRT1	4.3252	2.5433
15	26	HPRT1	4.91045	3.10145
15	27	HPRT1	5.43016	3.59407
15	28	HPRT1	5.87423	4.01103
15	29	HPRT1	6.20738	4.31709
15	30	HPRT1	6.51646	4.59907
15	31	HPRT1	6.80815	4.86365
15	32	HPRT1	7.04406	5.07246
15	33	HPRT1	7.20252	5.20383
15	34	HPRT1	7.33654	5.31074
15	35	HPRT1	7.4973	5.4444
15	36	HPRT1	7.63359	5.55359
15	37	HPRT1	7.73443	5.62733
15	38	HPRT1	7.83737	5.70317
15	39	HPRT1	7.92893	5.76763
15	40	HPRT1	8.02553	5.83713
16	1	HPRT1	0.686601	-0.036641
16	2	HPRT1	0.706145	-0.0297511
16	3	HPRT1	0.740268	-0.00828328
16	4	HPRT1	0.762357	0.00115116
16	5	HPRT1	0.774851	0.000989667
16	6	HPRT1	0.788823	0.00230709
16	7	HPRT1	0.80038	0.00120962
16	8	HPRT1	0.812947	0.00112127
16	9	HPRT1	0.826091	0.00161006
16	10	HPRT1	0.840717	0.00358147
16	11	HPRT1	0.853057	0.00326703
16	12	HPRT1	0.8651	0.00265481
16	13	HPRT1	0.872664	-0.00243563
16	14	HPRT1	0.882576	-0.00517866
16	15	HPRT1	0.898415	-0.0019946
16	16	HPRT1	0.916819	0.00375454
16	17	HPRT1	0.944493	0.0187732
16	18	HPRT1	1.00115	0.0627713
16	19	HPRT1	1.08294	0.131912
16	20	HPRT1	1.2372	0.273513
16	21	HPRT1	1.50642	0.530084
16	22	HPRT1	1.9675	0.978503
16	23	HPRT1	2.67086	1.66921
16	24	HPRT1	3.51034	2.49604
16	25	HPRT1	4.29709	3.27013
16	26	HPRT1	4.96763	3.92802
16	27	HPRT1	5.56289	4.51062
16	28	HPRT1	6.07194	5.00702
16	29	HPRT1	6.53444	5.45687
16	30	HPRT1	6.8752	5.78497
16	31	HPRT1	7.13646	6.03357
16	32	HPRT1	7.39154	6.276
16	33	HPRT1	7.61932	6.49112
16	34	HPRT1	7.77855	6.6377
16	35	HPRT1	7.91077	6.75727
16	36	HPRT1	8.05672	6.89056
16	37	HPRT1	8.17661	6.9978
16	38	HPRT1	8.28421	7.09274
16	39	HPRT1	8.38351	7.17938
16	40	HPRT1	8.45636	7.23958
17	1	HPRT1	0.807561	-0.00501775
17	2	HPRT1	0.825959	-0.00128594
17	3	HPRT1	0.845317	0.00340622
17	4	HPRT1	0.856464	-0.00011329
17	5	HPRT1	0.868937	-0.00230654
17	6	HPRT1	0.887075	0.00116498
17	7	HPRT1	0.903828	0.00325248
17	8	HPRT1	0.912476	-0.00276608
17	9	HPRT1	0.927605	-0.00230322
17	10	HPRT1	0.942547	-0.00202747
17	11	HPRT1	0.958337	-0.000903302
17	12	HPRT1	0.972198	-0.00170919
17	13	HPRT1	0.988326	-0.000246649
17	14	HPRT1	1.00272	-0.000514369
17	15	HPRT1	1.02297	0.00506644
17	16	HPRT1	1.03787	0.00529427
17	17	HPRT1	1.06512	0.0178853
17	18	HPRT1	1.11028	0.0483752
17	19	HPRT1	1.18904	0.112474
17	20	HPRT1	1.33578	0.244549
17	21	HPRT1	1.59317	0.487263
17	22	HPRT1	2.00491	0.884344
17	23	HPRT1	2.59267	1.45743
17	24	HPRT1	3.26975	2.11985
17	25	HPRT1	3.89945	2.73488
17	26	HPRT1	4.44118	3.26195
17	27	HPRT1	4.91292	3.71903
17	28	HPRT1	5.31572	4.10715
17	29	HPRT1	5.65052	4.42729
17	30	HPRT1	5.93298	4.69508
17	31	HPRT1	6.16957	4.917
17	32	HPRT1	6.35263	5.0854
17	33	HPRT1	6.54689	5.26499
17	34	HPRT1	6.67693	5.38037
17	35	HPRT1	6.81821	5.50698
17	36	HPRT1	6.93898	5.61309
17	37	HPRT1	7.05637	5.71581
17	38	HPRT1	7.20144	5.84622
17	39	HPRT1	7.28033	5.91043
17	40	HPRT1	7.34317	5.95861
18	1	HPRT1	1.27497	0.0811397
18	2	HPRT1	1.27897	0.0651876
18	3	HPRT1	1.29268	0.0589546
18	4	HPRT1	1.27748	0.0238086
18	5	HPRT1	1.2715	-0.00211841
18	6	HPRT1	1.27877	-0.0147894
18	7	HPRT1	1.28449	-0.0290136
18	8	HPRT1	1.29833	-0.0351179
18	9	HPRT1	1.30664	-0.0467569
18	10	HPRT1	1.34274	-0.030598
18	11	HPRT1	1.38195	-0.0113409
18	12	HPRT1	1.42646	0.0132276
18	13	HPRT1	1.46152	0.028341
18	14	HPRT1	1.49853	0.0454034
18	15	HPRT1	1.54143	0.0683682
18	16	HPRT1	1.59367	0.100654
18	17	HPRT1	1.64224	0.129287
18	18	HPRT1	1.71143	0.178529
18	19	HPRT1	1.81974	0.266889
18	20	HPRT1	2.00987	0.437073
18	21	HPRT1	2.31799	0.725254
18	22	HPRT1	2.77989	1.16721
18	23	HPRT1	3.36584	1.73321
18	24	HPRT1	3.95076	2.29818
18	25	HPRT1	4.51881	2.84629
18	26	HPRT1	4.97874	3.28627
18	27	HPRT1	5.38255	3.67014
18	28	HPRT1	5.69168	3.95933
18	29	HPRT1	5.99432	4.24202
18	30	HPRT1	6.23391	4.46167
18	31	HPRT1	6.44451	4.65232
18	32	HPRT1	6.63927	4.82714
18	33	HPRT1	6.80841	4.97634
18	34	HPRT1	6.93157	5.07955
18	35	HPRT1	7.04691	5.17494
18	36	HPRT1	7.14982	5.2579
18	37	HPRT1	7.26694	5.35508
18	38	HPRT1	7.34208	5.41027
18	39	HPRT1	7.42336	5.47161
18	40	HPRT1	7.48663	5.51493
19	1	HPRT1	0.79173	-0.0260903
19	2	HPRT1	0.809579	-0.0247917
19	3	HPRT1	0.84148	-0.00944206
19	4	HPRT1	0.871679	0.00420576
19	5	HPRT1	0.888421	0.00439688
19	6	HPRT1	0.902829	0.00225412
19	7	HPRT1	0.918003	0.000876919
19	8	HPRT1	0.936056	0.00237827
19	9	HPRT1	0.951386	0.00115729
19	10	HPRT1	0.963709	-0.0030705
19	11	HPRT1	0.980018	-0.00331288
19	12	HPRT1	0.999807	-7.48343e-05
19	13	HPRT1	1.01779	0.00136047
19	14	HPRT1	1.03127	-0.00171385
19	15	HPRT1	1.05052	0.00098442
19	16	HPRT1	1.06729	0.00120659
19	17	HPRT1	1.10391	0.0212694
19	18	HPRT1	1.1606	0.0614077
19	19	HPRT1	1.25931	0.14357
19	20	HPRT1	1.42741	0.295124
19	21	HPRT1	1.72377	0.574931
19	22	HPRT1	2.20543	1.04003
19	23	HPRT1	2.83372	1.65178
19	24	HPRT1	3.50059	2.30209
19	25	HPRT1	4.1267	2.91165
19	26	HPRT1	4.68727	3.45567
19	27	HPRT1	5.1763	3.92815
19	28	HPRT1	5.55038	4.28568
19	29	HPRT1	5.84666	4.56542
19	30	HPRT1	6.15347	4.85566
19	31	HPRT1	6.38582	5.07147
19	32	HPRT1	6.57249	5.24159
19	33	HPRT1	6.74765	5.4002
19	34	HPRT1	6.8984	5.5344
19	35	HPRT1	7.02662	5.64607
19	36	HPRT1	7.11322	5.71611
19	37	HPRT1	7.21657	5.80291
19	38	HPRT1	7.31764	5.88743
19	39	HPRT1	7.38068	5.93392
19	40	HPRT1	7.43095	5.96764
20	1	HPRT1	0.836668	-0.0483534
20	2	HPRT1	0.860385	-0.0499299
20	3	HPRT1	0.909096	-0.0265128
20	4	HPRT1	0.948226	-0.0126766
20	5	HPRT1	0.986145	-5.11742e-05
20	6	HPRT1	1.01493	0.00344439
20	7	HPRT1	1.04791	0.0111272
20	8	HPRT1	1.07987	0.0177941
20	9	HPRT1	1.10767	0.0203011
20	10	HPRT1	1.12409	0.0114292
20	11	HPRT1	1.14584	0.00788058
20	12	HPRT1	1.16715	0.00389933
20	13	HPRT1	1.18503	-0.00351585
20	14	HPRT1	1.20342	-0.0104203
20	15	HPRT1	1.22525	-0.0138873
20	16	HPRT1	1.25562	-0.00881176
20	17	HPRT1	1.29089	0.00117081
20	18	HPRT1	1.34313	0.0281197
20	19	HPRT1	1.43017	0.0898574
20	20	HPRT1	1.59139	0.225792
20	21	HPRT1	1.87546	0.48456
20	22	HPRT1	2.33161	0.915421
20	23	HPRT1	2.9634	1.52191
20	24	HPRT1	3.65926	2.19248
20	25	HPRT1	4.25822	2.76615
20	26	HPRT1	4.80458	3.28722
20	27	HPRT1	5.2719	3.72924
20	28	HPRT1	5.68699	4.11904
20	29	HPRT1	6.03056	4.43732
20	30	HPRT1	6.27872	4.66018
20	31	HPRT1	6.52752	4.88369
20	32	HPRT1	6.72743	5.0583
20	33	HPRT1	6.91545	5.22103
20	34	HPRT1	7.0913	5.37158
20	35	HPRT1	7.2121	5.46709
20	36	HPRT1	7.33997	5.56966
20	37	HPRT1	7.44847	5.65287
20	38	HPRT1	7.56104	5.74015
20	39	HPRT1	7.61796	5.77178
20	40	HPRT1	7.65392	5.78244
21	1	HPRT1	1.47737	-0.00922981
21	2	HPRT1	1.48885	-0.0145875
21	3	HPRT1	1.51266	-0.00761196
21	4	HPRT1	1.53782	0.000701317
21	5	HPRT1	1.54987	-0.00408902
21	6	HPRT1	1.56845	-0.00234489
21	7	HPRT1	1.59576	0.00812393
21	8	HPRT1	1.60882	0.00434509
21	9	HPRT1	1.62279	0.00147724
21	10	HPRT1	1.64171	0.00355682
21	11	HPRT1	1.65825	0.0032602
21	12	HPRT1	1.67855	0.00671951
21	13	HPRT1	1.68789	-0.000781996
21	14	HPRT1	1.69744	-0.00806678
21	15	HPRT1	1.71706	-0.00528947
21	16	HPRT1	1.74297	0.00378674
21	17	HPRT1	1.77679	0.0207652
21	18	HPRT1	1.8208	0.0479385
21	19	HPRT1	1.90257	0.112866
21	20	HPRT1	2.0501	0.24356
21	21	HPRT1	2.31013	0.486752
21	22	HPRT1	2.73261	0.892393
21	23	HPRT1	3.32014	1.46308
21	24	HPRT1	3.95959	2.08569
21	25	HPRT1	4.54465	2.65392
21	26	HPRT1	5.06899	3.16142
21	27	HPRT1	5.53784	3.61343
21	28	HPRT1	5.93938	3.99813
21	29	HPRT1	6.26571	4.30761
21	30	HPRT1	6.52682	4.55189
21	31	HPRT1	6.76856	4.77679
21	32	HPRT1	6.95254	4.94393
21	33	HPRT1	7.12447	5.09902
21	34	HPRT1	7.28374	5.24145
21	35	HPRT1	7.4208	5.36167
21	36	HPRT1	7.52712	5.45115
21	37	HPRT1	7.60866	5.51585
21	38	HPRT1	7.70483	5.59518
21	39	HPRT1	7.77813	5.65164
21	40	HPRT1	7.82649	5.68317
22	1	HPRT1	1.52979	-0.0714592
22	2	HPRT1	1.58205	-0.0455445
22	3	HPRT1	1.6445	-0.00942253
22	4	HPRT1	1.66466	-0.0156008
22	5	HPRT1	1.70218	-0.00442163
22	6	HPRT1	1.7434	0.0104596
22	7	HPRT1	1.77207	0.0127923
22	8	HPRT1	1.78761	0.00199617
22	9	HPRT1	1.81927	0.00731873
22	10	HPRT1	1.84991	0.0116281
22	11	HPRT1	1.8711	0.00647968
22	12	HPRT1	1.89294	0.00198464
22	13	HPRT1	1.91406	-0.00323032
22	14	HPRT1	1.93461	-0.00901724
22	15	HPRT1	1.959	-0.0109667
22	16	HPRT1	1.98548	-0.01082
22	17	HPRT1	2.02078	-0.00185951
22	18	HPRT1	2.0845	0.0355209
22	19	HPRT1	2.17833	0.103018
22	20	HPRT1	2.35821	0.256556
22	21	HPRT1	2.65714	0.529157
22	22	HPRT1	3.09326	0.938938
22	23	HPRT1	3.64323	1.46257
22	24	HPRT1	4.16811	1.96111
22	25	HPRT1	4.63943	2.4061
22	26	HPRT1	5.09616	2.83649
22	27	HPRT1	5.46437	3.17837
22	28	HPRT1	5.80279	3.49045
22	29	HPRT1	6.06252	3.72384
22	30	HPRT1	6.33642	3.97141
22	31	HPRT1	6.54384	4.15248
22	32	HPRT1	6.70887	4.29118
22	33	HPRT1	6.84001	4.39598
22	34	HPRT1	6.98081	4.51044
22	35	HPRT1	7.09243	4.59573
22	36	HPRT1	7.16994	4.6469
22	37	HPRT1	7.26671	4.71733
22	38	HPRT1	7.37202	4.79631
22	39	HPRT1	7.44012	4.83808
22	40	HPRT1	7.55304	4.92465
23	1	HPRT1	0.891563	-0.0199753
23	2	HPRT1	0.902478	-0.0292372
23	3	HPRT1	0.942411	-0.0094806
23	4	HPRT1	0.968453	-0.00361507
23	5	HPRT1	0.990703	-0.00154171
23	6	HPRT1	1.01494	0.00251518
23	7	HPRT1	1.03081	-0.00178737
23	8	HPRT1	1.0606	0.00782146
23	9	HPRT1	1.08061	0.00765452
23	10	HPRT1	1.10377	0.0106398
23	11	HPRT1	1.12397	0.010663
23	12	HPRT1	1.12982	-0.0036631
23	13	HPRT1	1.14421	-0.0094473
23	14	HPRT1	1.1678	-0.00603235
23	15	HPRT1	1.19028	-0.00372653
23	16	HPRT1	1.21337	-0.000817867
23	17	HPRT1	1.2467	0.012335
23	18	HPRT1	1.31065	0.0561062
23	19	HPRT1	1.41292	0.138198
23	20	HPRT1	1.5952	0.300303
23	21	HPRT1	1.88979	0.574721
23	22	HPRT1	2.357	1.02176
23	23	HPRT1	2.95515	1.59973
23	24	HPRT1	3.55894	2.18334
23	25	HPRT1	4.10566	2.70988
23	26	HPRT1	4.57649	3.16053
23	27	HPRT1	4.98575	3.54962
23	28	HPRT1	5.37748	3.92118
23	29	HPRT1	5.65973	4.18325
23	30	HPRT1	5.89288	4.39622
23	31	HPRT1	6.1009	4.58407
23	32	HPRT1	6.28684	4.74982
23	33	HPRT1	6.437	4.87981
23	34	HPRT1	6.57798	5.00062
23	35	HPRT1	6.6901	5.09256
23	36	HPRT1	6.79355	5.17583
23	37	HPRT1	6.89246	5.25457
23	38	HPRT1	6.96874	5.31067
23	39	HPRT1	7.02479	5.34654
23	40	HPRT1	7.11489	5.41646
24	1	HPRT1	0.61434	-0.0533326
24	2	HPRT1	0.645197	-0.0394301
24	3	HPRT1	0.685174	-0.0164084
24	4	HPRT1	0.71163	-0.00690712
24	5	HPRT1	0.736401	0.000908704
24	6	HPRT1	0.762118	0.0096707
24	7	HPRT1	0.780372	0.01097
24	8	HPRT1	0.79458	0.00822252
24	9	HPRT1	0.808307	0.00499486
24	10	HPRT1	0.826581	0.00631408
24	11	HPRT1	0.836959	-0.000263601
24	12	HPRT1	0.850324	-0.00385306
24	13	HPRT1	0.864464	-0.00666796
24	14	HPRT1	0.883935	-0.004152
24	15	HPRT1	0.902213	-0.00282873
24	16	HPRT1	0.919087	-0.00290962
24	17	HPRT1	0.955388	0.0164357
24	18	HPRT1	1.01955	0.0636459
24	19	HPRT1	1.11925	0.146391
24	20	HPRT1	1.30608	0.316263
24	21	HPRT1	1.61677	0.609999
24	22	HPRT1	2.09689	1.07316
24	23	HPRT1	2.69322	1.65254
24	24	HPRT1	3.29566	2.23803
24	25	HPRT1	3.82579	2.7512
24	26	HPRT1	4.28252	3.19097
24	27	HPRT1	4.69106	3.58255
24	28	HPRT1	5.03545	3.90999
24	29	HPRT1	5.33321	4.1908
24	30	HPRT1	5.57686	4.41749
24	31	HPRT1	5.76679	4.59047
24	32	HPRT1	5.94254	4.74926
24	33	HPRT1	6.09882	4.88859
24	34	HPRT1	6.24086	5.01367
24	35	HPRT1	6.3804	5.13626
24	36	HPRT1	6.48088	5.21979
24	37	HPRT1	6.5465	5.26844
24	38	HPRT1	6.63992	5.34491
24	39	HPRT1	6.73659	5.42462
24	40	HPRT1	6.81298	5.48407
25	1	HPRT1	1.0069	-0.0601261
25	2	HPRT1	1.04692	-0.0350172
25	3	HPRT1	1.08766	-0.00918106
25	4	HPRT1	1.11129	-0.000466226
25	5	HPRT1	1.12645	-0.000212985
25	6	HPRT1	1.14287	0.00129744
25	7	HPRT1	1.16403	0.00755012
25	8	HPRT1	1.17577	0.00437359
25	9	HPRT1	1.18675	0.000449859
25	10	HPRT1	1.20389	0.00267935
25	11	HPRT1	1.22066	0.00453238
25	12	HPRT1	1.22815	-0.00288788
25	13	HPRT1	1.24102	-0.00492417
25	14	HPRT1	1.25988	-0.000975446
25	15	HPRT1	1.27353	-0.00223497
25	16	HPRT1	1.28619	-0.0044775
25	17	HPRT1	1.3174	0.011818
25	18	HPRT1	1.35615	0.0356553
25	19	HPRT1	1.42588	0.0904741
25	20	HPRT1	1.55375	0.203435
25	21	HPRT1	1.79336	0.428141
25	22	HPRT1	2.19311	0.812976
25	23	HPRT1	2.82316	1.42812
25	24	HPRT1	3.6079	2.19795
25	25	HPRT1	4.39663	2.97177
25	26	HPRT1	5.05586	3.61609
25	27	HPRT1	5.62978	4.1751
25	28	HPRT1	6.12975	4.66016
25	29	HPRT1	6.52668	5.04218
25	30	HPRT1	6.83591	5.3365
25	31	HPRT1	7.12427	5.60995
25	32	HPRT1	7.40547	5.87624
25	33	HPRT1	7.61557	6.07143
25	34	HPRT1	7.73827	6.17922
25	35	HPRT1	7.88613	6.31218
25	36	HPRT1	8.04239	6.45352
25	37	HPRT1	8.15753	6.55376
25	38	HPRT1	8.24932	6.63063
25	39	HPRT1	8.35227	6.71868
25	40	HPRT1	8.43949	6.79098
26	1	HPRT1	0.86288	0.121222
26	2	HPRT1	0.868317	0.0624419
26	3	HPRT1	0.874933	0.00484205
26	4	HPRT1	0.893212	-0.0410953
26	5	HPRT1	0.940657	-0.0578674
26	6	HPRT1	0.998841	-0.0639
26	7	HPRT1	1.04492	-0.0820361
26	8	HPRT1	1.16067	-0.0305012
26	9	HPRT1	1.41355	0.158155
26	10	HPRT1	1.47186	0.152253
26	11	HPRT1	1.48936	0.105533
26	12	HPRT1	1.50241	0.0543745
26	13	HPRT1	1.53031	0.0180558
26	14	HPRT1	1.55125	-0.0252215
26	15	HPRT1	1.55927	-0.0814195
26	16	HPRT1	1.59373	-0.111173
26	17	HPRT1	1.63377	-0.135353
26	18	HPRT1	1.69499	-0.138347
26	19	HPRT1	1.80026	-0.0972984
26	20	HPRT1	1.984	0.0222305
26	21	HPRT1	2.28012	0.254129
26	22	HPRT1	2.738	0.64779
26	23	HPRT1	3.33449	1.18007
26	24	HPRT1	3.90225	1.68362
26	25	HPRT1	4.43136	2.14851
26	26	HPRT1	4.90962	2.56254
26	27	HPRT1	5.30263	2.89135
26	28	HPRT1	5.65008	3.17457
26	29	HPRT1	5.92637	3.38664
26	30	HPRT1	6.13498	3.53104
26	31	HPRT1	6.32629	3.65814
26	32	HPRT1	6.52442	3.79205
26	33	HPRT1	6.72634	3.92975
26	34	HPRT1	6.80311	3.94231
26	35	HPRT1	6.90807	3.98305
26	36	HPRT1	7.0446	4.05536
26	37	HPRT1	7.13976	4.08631
26	38	HPRT1	7.22681	4.10914
26	39	HPRT1	7.25883	4.07694
26	40	HPRT1	7.29979	4.05369
27	1	HPRT1	0.801978	0.0755287
27	2	HPRT1	0.797371	0.0594764
27	3	HPRT1	0.781327	0.0319865
27	4	HPRT1	0.768216	0.0074304
27	5	HPRT1	0.764889	-0.00734308
27	6	HPRT1	0.769706	-0.0139716
27	7	HPRT1	0.77903	-0.016093
27	8	HPRT1	0.786761	-0.0198076
27	9	HPRT1	0.809206	-0.00880854
27	10	HPRT1	0.826056	-0.00340418
27	11	HPRT1	0.839463	-0.00144265
27	12	HPRT1	0.866086	0.0137349
27	13	HPRT1	0.881516	0.0177188
27	14	HPRT1	0.909563	0.0343204
27	15	HPRT1	0.938884	0.0521958
27	16	HPRT1	0.9638	0.065666
27	17	HPRT1	1.00531	0.0957334
27	18	HPRT1	1.06552	0.144495
27	19	HPRT1	1.15115	0.21868
27	20	HPRT1	1.29096	0.347045
27	21	HPRT1	1.51372	0.55836
27	22	HPRT1	1.88757	0.920762
27	23	HPRT1	2.46726	1.48901
27	24	HPRT1	3.19022	2.20052
27	25	HPRT1	3.90434	2.90319
27	26	HPRT1	4.51979	3.5072
27	27	HPRT1	5.04583	4.02179
27	28	HPRT1	5.48702	4.45154
27	29	HPRT1	5.85861	4.81169
27	30	HPRT1	6.1501	5.09173
27	31	HPRT1	6.45405	5.38423
27	32	HPRT1	6.67203	5.59077
27	33	HPRT1	6.84938	5.75667
27	34	HPRT1	6.98795	5.8838
27	35	HPRT1	7.11594	6.00034
27	36	HPRT1	7.2543	6.12725
27	37	HPRT1	7.32017	6.18168
27	38	HPRT1	7.41586	6.26592
27	39	HPRT1	7.53138	6.37
27	40	HPRT1	7.59545	6.42262
28	1	HPRT1	0.92785	-0.0106473
28	2	HPRT1	0.939309	-0.0370461
28	3	HPRT1	0.95904	-0.0551727
28	4	HPRT1	0.975042	-0.0770282
28	5	HPRT1	1.04963	-0.0402995
28	6	HPRT1	1.20633	0.0785451
28	7	HPRT1	1.23921	0.073569
28	8	HPRT1	1.25927	0.0557722
28	9	HPRT1	1.28102	0.0396665
28	10	HPRT1	1.30835	0.0291392
28	11	HPRT1	1.32668	0.0096086
28	12	HPRT1	1.33624	-0.0186853
28	13	HPRT1	1.34834	-0.0444447
28	14	HPRT1	1.37997	-0.0506702
28	15	HPRT1	1.40757	-0.0609308
28	16	HPRT1	1.44677	-0.0595887
28	17	HPRT1	1.51742	-0.0267951
28	18	HPRT1	1.61907	0.036999
28	19	HPRT1	1.79642	0.176488
28	20	HPRT1	2.09957	0.441783
28	21	HPRT1	2.59653	0.900882
28	22	HPRT1	3.24574	1.51223
28	23	HPRT1	3.9054	2.13404
28	24	HPRT1	4.51554	2.70632
28	25	HPRT1	5.0456	3.19852
28	26	HPRT1	5.53672	3.65179
28	27	HPRT1	5.90839	3.9856
28	28	HPRT1	6.2408	4.28015
28	29	HPRT1	6.53005	4.53154
28	30	HPRT1	6.73991	4.70355
28	31	HPRT1	6.96924	4.89502
28	32	HPRT1	7.17028	5.0582
28	33	HPRT1	7.3115	5.16156
28	34	HPRT1	7.42852	5.24072
28	35	HPRT1	7.52836	5.30271
28	36	HPRT1	7.65549	5.39198
28	37	HPRT1	7.75204	5.45067
28	38	HPRT1	7.84467	5.50545
28	39	HPRT1	7.91518	5.53809
28	40	HPRT1	7.93268	5.51774
29	1	HPRT1	1.36709	-0.0179932
29	2	HPRT1	1.38792	-0.0201155
29	3	HPRT1	1.42823	-0.00275082
29	4	HPRT1	1.45306	-0.000872497
29	5	HPRT1	1.46784	-0.00903839
29	6	HPRT1	1.49328	-0.00654805
29	7	HPRT1	1.52368	0.000908782
29	8	HPRT1	1.56022	0.0145001
29	9	HPRT1	1.58083	0.0121592
29	10	HPRT1	1.59572	0.00410484
29	11	HPRT1	1.61304	-0.00152393
29	12	HPRT1	1.63831	0.000794868
29	13	HPRT1	1.6586	-0.00186332
29	14	HPRT1	1.68052	-0.00288882
29	15	HPRT1	1.69938	-0.00698193
29	16	HPRT1	1.72924	-6.79768e-05
29	17	HPRT1	1.77237	0.0201204
29	18	HPRT1	1.83072	0.0555162
29	19	HPRT1	1.93941	0.141257
29	20	HPRT1	2.12223	0.301132
29	21	HPRT1	2.45351	0.609461
29	22	HPRT1	3.00097	1.13397
29	23	HPRT1	3.73267	1.84272
29	24	HPRT1	4.56432	2.65143
29	25	HPRT1	5.33861	3.40278
29	26	HPRT1	6.02762	4.06884
29	27	HPRT1	6.62768	4.64594
29	28	HPRT1	7.0777	5.07301
29	29	HPRT1	7.49689	5.46926
29	30	HPRT1	7.87364	5.82306
29	31	HPRT1	8.17387	6.10034
29	32	HPRT1	8.38641	6.28993
29	33	HPRT1	8.57738	6.45796
29	34	HPRT1	8.76335	6.62098
29	35	HPRT1	8.93765	6.77233
29	36	HPRT1	9.11487	6.92661
29	37	HPRT1	9.18065	6.96943
29	38	HPRT1	9.31896	7.0848
29	39	HPRT1	9.42424	7.16712
29	40	HPRT1	9.49528	7.21522
30	1	HPRT1	1.18185	-0.0346815
30	2	HPRT1	1.20722	-0.0275221
30	3	HPRT1	1.24065	-0.0123043
30	4	HPRT1	1.2744	0.00323983
30	5	HPRT1	1.29717	0.00779587
30	6	HPRT1	1.30766	8.21764e-05
30	7	HPRT1	1.3272	0.00141074
30	8	HPRT1	1.34549	0.00148904
30	9	HPRT1	1.36244	0.000230769
30	10	HPRT1	1.38521	0.00478347
30	11	HPRT1	1.40062	0.00199181
30	12	HPRT1	1.41262	-0.00422426
30	13	HPRT1	1.43056	-0.00449513
30	14	HPRT1	1.45646	0.00319957
30	15	HPRT1	1.48867	0.0171927
30	16	HPRT1	1.51627	0.026583
30	17	HPRT1	1.56609	0.0582002
30	18	HPRT1	1.6433	0.117193
30	19	HPRT1	1.78268	0.238363
30	20	HPRT1	2.03497	0.472446
30	21	HPRT1	2.47037	0.889631
30	22	HPRT1	3.12701	1.52807
30	23	HPRT1	3.94082	2.32367
30	24	HPRT1	4.76987	3.13451
30	25	HPRT1	5.51086	3.85729
30	26	HPRT1	6.14939	4.4776
30	27	HPRT1	6.68145	4.99145
30	28	HPRT1	7.14274	5.43454
30	29	HPRT1	7.52438	5.79797
30	30	HPRT1	7.84095	6.09633
30	31	HPRT1	8.11313	6.3503
30	32	HPRT1	8.37845	6.5974
30	33	HPRT1	8.54676	6.7475
30	34	HPRT1	8.6457	6.82823
30	35	HPRT1	8.80383	6.96815
30	36	HPRT1	8.96848	7.11459
30	37	HPRT1	9.06165	7.18955
30	38	HPRT1	9.16191	7.2716
30	39	HPRT1	9.2483	7.33978
30	40	HPRT1	9.31804	7.39131
31	1	HPRT1	0.80058	-0.0115064
31	2	HPRT1	0.81652	-0.00995973
31	3	HPRT1	0.838883	-0.00198992
31	4	HPRT1	0.854689	-0.000576326
31	5	HPRT1	0.874731	0.00507284
31	6	HPRT1	0.884135	8.3344e-05
31	7	HPRT1	0.894825	-0.00361946
31	8	HPRT1	0.911113	-0.00172527
31	9	HPRT1	0.930655	0.00342434
31	10	HPRT1	0.939222	-0.00240188
31	11	HPRT1	0.953309	-0.00270812
31	12	HPRT1	0.975289	0.00487897
31	13	HPRT1	0.989894	0.00509046
31	14	HPRT1	0.996447	-0.0027492
31	15	HPRT1	1.01081	-0.00277977
31	16	HPRT1	1.03473	0.00674542
31	17	HPRT1	1.07268	0.0302999
31	18	HPRT1	1.12682	0.0700476
31	19	HPRT1	1.21324	0.142074
31	20	HPRT1	1.36779	0.282239
31	21	HPRT1	1.64017	0.540219
31	22	HPRT1	2.09762	0.983275
31	23	HPRT1	2.80753	1.67879
31	24	HPRT1	3.66297	2.51984
31	25	HPRT1	4.48748	3.32996
31	26	HPRT1	5.22776	4.05585
31	27	HPRT1	5.86328	4.67697
31	28	HPRT1	6.39515	5.19445
31	29	HPRT1	6.85111	5.63602
31	30	HPRT1	7.21588	5.98639
31	31	HPRT1	7.52737	6.28349
31	32	HPRT1	7.77526	6.51699
31	33	HPRT1	8.0131	6.74043
31	34	HPRT1	8.20611	6.91906
31	35	HPRT1	8.30138	6.99993
31	36	HPRT1	8.47513	7.15928
31	37	HPRT1	8.61139	7.28115
31	38	HPRT1	8.73094	7.38631
31	39	HPRT1	8.84979	7.49076
31	40	HPRT1	8.8893	7.51588
32	1	HPRT1	1.05067	0.000945049
32	2	HPRT1	1.05577	-0.0126354
32	3	HPRT1	1.09408	0.00700096
32	4	HPRT1	1.11766	0.0119023
32	5	HPRT1	1.11201	-0.0124179
32	6	HPRT1	1.12631	-0.0167976
32	7	HPRT1	1.16751	0.00573141
32	8	HPRT1	1.18445	0.00398747
32	9	HPRT1	1.19243	-0.00670896
32	10	HPRT1	1.22132	0.00350892
32	11	HPRT1	1.23919	0.00270495
32	12	HPRT1	1.2557	0.000536036
32	13	HPRT1	1.27098	-0.00286229
32	14	HPRT1	1.29518	0.00266245
32	15	HPRT1	1.31195	0.000752215
32	16	HPRT1	1.33569	0.00582157
32	17	HPRT1	1.37292	0.0243718
32	18	HPRT1	1.44994	0.0827195
32	19	HPRT1	1.57673	0.190831
32	20	HPRT1	1.80325	0.398676
32	21	HPRT1	2.18072	0.757465
32	22	HPRT1	2.75189	1.30997
32	23	HPRT1	3.40399	1.94338
32	24	HPRT1	3.99199	2.51271
32	25	HPRT1	4.52764	3.02968
32	26	HPRT1	5.01066	3.49403
32	27	HPRT1	5.45859	3.92328
32	28	HPRT1	5.74331	4.18932
32	29	HPRT1	6.00791	4.43525
32	30	HPRT1	6.26856	4.67722
32	31	HPRT1	6.50348	4.89347
32	32	HPRT1	6.67425	5.04556
32	33	HPRT1	6.84209	5.19472
32	34	HPRT1	6.93087	5.26483
32	35	HPRT1	7.05081	5.36609
32	36	HPRT1	7.15246	5.44906
32	37	HPRT1	7.25713	5.53505
32	38	HPRT1	7.33015	5.5894
32	39	HPRT1	7.37868	5.61925
32	40	HPRT1	7.42378	5.64568
33	1	HPRT1	1.16173	-0.03788
33	2	HPRT1	1.19514	-0.0229996
33	3	HPRT1	1.22919	-0.00747955
33	4	HPRT1	1.25181	-0.00338106
33	5	HPRT1	1.27147	-0.00225313
33	6	HPRT1	1.29278	0.000530604
33	7	HPRT1	1.31693	0.0061526
33	8	HPRT1	1.33467	0.00537078
33	9	HPRT1	1.35789	0.0100591
33	10	HPRT1	1.36915	0.00279949
33	11	HPRT1	1.38768	0.00280028
33	12	HPRT1	1.4005	-0.00290404
33	13	HPRT1	1.41467	-0.00726022
33	14	HPRT1	1.43602	-0.00443488
33	15	HPRT1	1.45809	-0.000896188
33	16	HPRT1	1.49269	0.0151763
33	17	HPRT1	1.54555	0.0495061
33	18	HPRT1	1.62861	0.114042
33	19	HPRT1	1.77308	0.239982
33	20	HPRT1	2.02139	0.469771
33	21	HPRT1	2.43217	0.862024
33	22	HPRT1	3.01355	1.42487
33	23	HPRT1	3.65315	2.04595
33	24	HPRT1	4.2655	2.63977
33	25	HPRT1	4.80076	3.1565
33	26	HPRT1	5.28056	3.61778
33	27	HPRT1	5.7022	4.02089
33	28	HPRT1	6.00879	4.30895
33	29	HPRT1	6.3012	4.58284
33	30	HPRT1	6.5309	4.79401
33	31	HPRT1	6.72682	4.97141
33	32	HPRT1	6.8933	5.11936
33	33	HPRT1	7.06278	5.27032
33	34	HPRT1	7.19564	5.38464
33	35	HPRT1	7.27959	5.45007
33	36	HPRT1	7.40226	5.55421
33	37	HPRT1	7.4692	5.60263
33	38	HPRT1	7.55341	5.66831
33	39	HPRT1	7.63985	5.73623
33	40	HPRT1	7.7046	5.78245
34	1	HPRT1	0.495383	-0.0163709
34	2	HPRT1	0.506602	-0.0170363
34	3	HPRT1	0.527488	-0.00803562
34	4	HPRT1	0.544663	-0.00274479
34	5	HPRT1	0.560833	0.00154034
34	6	HPRT1	0.574707	0.00352985
34	7	HPRT1	0.581333	-0.0017291
34	8	HPRT1	0.589599	-0.00534791
34	9	HPRT1	0.614272	0.00744077
34	10	HPRT1	0.625194	0.0064777
34	11	HPRT1	0.634612	0.00401063
34	12	HPRT1	0.649432	0.00694672
34	13	HPRT1	0.659615	0.00524486
34	14	HPRT1	0.664438	-0.00181725
34	15	HPRT1	0.670752	-0.00738817
34	16	HPRT1	0.681897	-0.00812802
34	17	HPRT1	0.700192	-0.00171781
34	18	HPRT1	0.734034	0.02024
34	19	HPRT1	0.785756	0.0600767
34	20	HPRT1	0.872362	0.134798
34	21	HPRT1	1.0336	0.284147
34	22	HPRT1	1.31636	0.555028
34	23	HPRT1	1.79417	1.02095
34	24	HPRT1	2.48008	1.69498
34	25	HPRT1	3.25743	2.46044
34	26	HPRT1	3.95079	3.14192
34	27	HPRT1	4.5698	3.74904
34	28	HPRT1	5.08549	4.25285
34	29	HPRT1	5.53651	4.69198
34	30	HPRT1	5.8841	5.02769
34	31	HPRT1	6.21974	5.35145
34	32	HPRT1	6.45302	5.57284
34	33	HPRT1	6.63211	5.74004
34	34	HPRT1	6.81606	5.91211
34	35	HPRT1	6.95999	6.04415
34	36	HPRT1	7.10494	6.17722
34	37	HPRT1	7.2255	6.2859
34	38	HPRT1	7.33312	6.38163
34	39	HPRT1	7.42038	6.45701
34	40	HPRT1	7.48584	6.51059
35	1	HPRT1	0.99497	0.0632891
35	2	HPRT1	0.992623	0.0364102
35	3	HPRT1	1.0073	0.02656
35	4	HPRT1	1.01089	0.00561026
35	5	HPRT1	1.01186	-0.0179536
35	6	HPRT1	1.03236	-0.0219774
35	7	HPRT1	1.06788	-0.0109913
35	8	HPRT1	1.09307	-0.0103387
35	9	HPRT1	1.13144	0.0035073
35	10	HPRT1	1.16484	0.0123707
35	11	HPRT1	1.18771	0.0107118
35	12	HPRT1	1.20832	0.00678335
35	13	HPRT1	1.22793	0.00186618
35	14	HPRT1	1.25324	0.00264269
35	15	HPRT1	1.27107	-0.00405951
35	16	HPRT1	1.29493	-0.00473175
35	17	HPRT1	1.31706	-0.00713217
35	18	HPRT1	1.3615	0.0127734
35	19	HPRT1	1.42682	0.0535625
35	20	HPRT1	1.5497	0.151914
35	21	HPRT1	1.777	0.354675
35	22	HPRT1	2.14826	0.701406
35	23	HPRT1	2.71989	1.2485
35	24	HPRT1	3.40795	1.91204
35	25	HPRT1	4.06067	2.54022
35	26	HPRT1	4.65736	3.11238
35	27	HPRT1	5.15675	3.58723
35	28	HPRT1	5.56243	3.96838
35	29	HPRT1	5.93215	4.31357
35	30	HPRT1	6.25836	4.61524
35	31	HPRT1	6.54516	4.87751
35	32	HPRT1	6.75007	5.05789
35	33	HPRT1	6.91435	5.19765
35	34	HPRT1	7.07563	5.33439
35	35	HPRT1	7.21406	5.44829
35	36	HPRT1	7.33062	5.54032
35	37	HPRT1	7.39714	5.5823
35	38	HPRT1	7.51043	5.67106
35	39	HPRT1	7.57788	5.71398
35	40	HPRT1	7.6583	5.76987
36	1	HPRT1	1.13063	-0.103454
36	2	HPRT1	1.13543	-0.123699
36	3	HPRT1	1.19945	-0.084731
36	4	HPRT1	1.32197	0.0127344
36	5	HPRT1	1.35463	0.0203429
36	6	HPRT1	1.38632	0.0269769
36	7	HPRT1	1.40474	0.0203474
36	8	HPRT1	1.42472	0.015269
36	9	HPRT1	1.44656	0.0120617
36	10	HPRT1	1.47147	0.0119213
36	11	HPRT1	1.49149	0.00687898
36	12	HPRT1	1.5078	-0.00185965
36	13	HPRT1	1.53201	-0.00270221
36	14	HPRT1	1.55268	-0.00708397
36	15	HPRT1	1.57405	-0.0107711
36	16	HPRT1	1.59048	-0.0193847
36	17	HPRT1	1.62023	-0.0146891
36	18	HPRT1	1.67055	0.0105743
36	19	HPRT1	1.75308	0.0680574
36	20	HPRT1	1.88647	0.176389
36	21	HPRT1	2.12152	0.386384
36	22	HPRT1	2.50576	0.745573
36	23	HPRT1	3.08632	1.30108
36	24	HPRT1	3.75635	1.94607
36	25	HPRT1	4.41011	2.57477
36	26	HPRT1	4.97611	3.11571
36	27	HPRT1	5.45944	3.574
36	28	HPRT1	5.86631	3.95581
36	29	HPRT1	6.20828	4.27273
36	30	HPRT1	6.46079	4.50019
36	31	HPRT1	6.72787	4.74221
36	32	HPRT1	6.95641	4.9457
36	33	HPRT1	7.18547	5.14971
36	34	HPRT1	7.3349	5.27409
36	35	HPRT1	7.43398	5.34812
36	36	HPRT1	7.58438	5.47346
36	37	HPRT1	7.66255	5.52658
36	38	HPRT1	7.74403	5.583
36	39	HPRT1	7.87132	5.68525
36	40	HPRT1	7.92148	5.71035
37	1	HPRT1	0.936747	-0.0259518
37	2	HPRT1	0.966681	-0.0139164
37	3	HPRT1	1.00012	0.00162511
37	4	HPRT1	1.01551	-0.000880029
37	5	HPRT1	1.03462	0.000323195
37	6	HPRT1	1.05107	-0.00112444
37	7	HPRT1	1.06999	-0.000103007
37	8	HPRT1	1.08959	0.001604
37	9	HPRT1	1.10721	0.00132235
37	10	HPRT1	1.12441	0.000630742
37	11	HPRT1	1.14364	0.00195914
37	12	HPRT1	1.15878	-0.000797295
37	13	HPRT1	1.1681	-0.00937352
37	14	HPRT1	1.18938	-0.00599187
37	15	HPRT1	1.21895	0.00567519
37	16	HPRT1	1.2363	0.00513045
37	17	HPRT1	1.25999	0.0109142
37	18	HPRT1	1.2991	0.0321273
37	19	HPRT1	1.37543	0.0905593
37	20	HPRT1	1.50218	0.199412
37	21	HPRT1	1.71462	0.393954
37	22	HPRT1	2.08648	0.74792
37	23	HPRT1	2.65053	1.29407
37	24	HPRT1	3.33406	1.9597
37	25	HPRT1	3.98839	2.59613
37	26	HPRT1	4.58197	3.17182
37	27	HPRT1	5.11352	3.68547
37	28	HPRT1	5.56135	4.1154
37	29	HPRT1	5.92058	4.45673
37	30	HPRT1	6.20791	4.72616
37	31	HPRT1	6.43311	4.93346
37	32	HPRT1	6.65033	5.13279
37	33	HPRT1	6.86455	5.32911
37	34	HPRT1	7.03112	5.47778
37	35	HPRT1	7.14554	5.5743
37	36	HPRT1	7.26083	5.67169
37	37	HPRT1	7.37383	5.7668
37	38	HPRT1	7.45102	5.82609
37	39	HPRT1	7.5447	5.90187
37	40	HPRT1	7.64951	5.98878
38	1	HPRT1	1.43515	0.00117232
38	2	HPRT1	1.45508	-0.00718715
38	3	HPRT1	1.49684	0.00627583
38	4	HPRT1	1.52182	0.00296821
38	5	HPRT1	1.53717	-0.00997796
38	6	HPRT1	1.56076	-0.0146859
38	7	HPRT1	1.60441	0.000677369
38	8	HPRT1	1.6416	0.00957297
38	9	HPRT1	1.66511	0.00479085
38	10	HPRT1	1.69248	0.00386551
38	11	HPRT1	1.72194	0.00504075
38	12	HPRT1	1.7409	-0.00429588
38	13	HPRT1	1.77033	-0.00316188
38	14	HPRT1	1.80432	0.00253867
38	15	HPRT1	1.82646	-0.00360851
38	16	HPRT1	1.85471	-0.00365719
38	17	HPRT1	1.89652	0.00986146
38	18	HPRT1	1.9698	0.0548504
38	19	HPRT1	2.0819	0.138657
38	20	HPRT1	2.27274	0.301201
38	21	HPRT1	2.58525	0.585424
38	22	HPRT1	3.04403	1.01591
38	23	HPRT1	3.63866	1.58225
38	24	HPRT1	4.2478	2.1631
38	25	HPRT1	4.79011	2.67711
38	26	HPRT1	5.26302	3.12173
38	27	HPRT1	5.68012	3.51053
38	28	HPRT1	6.04658	3.84871
38	29	HPRT1	6.36445	4.13828
38	30	HPRT1	6.61832	4.36386
38	31	HPRT1	6.82694	4.54419
38	32	HPRT1	7.0113	4.70026
38	33	HPRT1	7.17648	4.83714
38	34	HPRT1	7.31129	4.94366
38	35	HPRT1	7.44523	5.04931
38	36	HPRT1	7.54692	5.1227
38	37	HPRT1	7.63078	5.17827
38	38	HPRT1	7.73316	5.25236
38	39	HPRT1	7.80943	5.30034
38	40	HPRT1	7.85872	5.32133
39	1	HPRT1	1.2689	-0.0363046
39	2	HPRT1	1.29911	-0.0291252
39	3	HPRT1	1.33714	-0.0141314
39	4	HPRT1	1.36345	-0.010859
39	5	HPRT1	1.39379	-0.00355893
39	6	HPRT1	1.42676	0.00637672
39	7	HPRT1	1.46263	0.0192099
39	8	HPRT1	1.47687	0.0104208
39	9	HPRT1	1.49325	0.00376123
39	10	HPRT1	1.51463	0.00210568
39	11	HPRT1	1.53503	-0.000534188
39	12	HPRT1	1.55868	8.38199e-05
39	13	HPRT1	1.58295	0.00131778
39	14	HPRT1	1.60356	-0.00111132
39	15	HPRT1	1.62249	-0.00521603
39	16	HPRT1	1.64288	-0.00786507
39	17	HPRT1	1.67984	0.0060567
39	18	HPRT1	1.73611	0.0392974
39	19	HPRT1	1.81952	0.0996656
39	20	HPRT1	1.95744	0.214546
39	21	HPRT1	2.19863	0.432702
39	22	HPRT1	2.59872	0.809762
39	23	HPRT1	3.16773	1.35574
39	24	HPRT1	3.80203	1.96699
39	25	HPRT1	4.38433	2.52626
39	26	HPRT1	4.90101	3.0199
39	27	HPRT1	5.35749	3.45335
39	28	HPRT1	5.76303	3.83585
39	29	HPRT1	6.09982	4.14961
39	30	HPRT1	6.35481	4.38155
39	31	HPRT1	6.56903	4.57274
39	32	HPRT1	6.74374	4.72441
39	33	HPRT1	6.93402	4.89166
39	34	HPRT1	7.08708	5.02168
39	35	HPRT1	7.19615	5.10772
39	36	HPRT1	7.31553	5.20406
39	37	HPRT1	7.45215	5.31764
39	38	HPRT1	7.55996	5.40241
39	39	HPRT1	7.64053	5.45995
39	40	HPRT1	7.72032	5.51671
40	1	HPRT1	0.684287	-0.0266027
40	2	HPRT1	0.704482	-0.0196128
40	3	HPRT1	0.723144	-0.0141553
40	4	HPRT1	0.735554	-0.0149502
40	5	HPRT1	0.752256	-0.0114535
40	6	HPRT1	0.793395	0.016481
40	7	HPRT1	0.810017	0.019898
40	8	HPRT1	0.815354	0.0120303
40	9	HPRT1	0.821635	0.00510659
40	10	HPRT1	0.836092	0.00635927
40	11	HPRT1	0.849645	0.00670708
40	12	HPRT1	0.853555	-0.00258705
40	13	HPRT1	0.861066	-0.00828112
40	14	HPRT1	0.874737	-0.00781498
40	15	HPRT1	0.888416	-0.00734009
40	16	HPRT1	0.905232	-0.00372886
40	17	HPRT1	0.92802	0.00585386
40	18	HPRT1	0.982153	0.0467827
40	19	HPRT1	1.06146	0.112885
40	20	HPRT1	1.19881	0.237029
40	21	HPRT1	1.43834	0.463354
40	22	HPRT1	1.86113	0.872941
40	23	HPRT1	2.50117	1.49978
40	24	HPRT1	3.26632	2.25172
40	25	HPRT1	3.98583	2.95803
40	26	HPRT1	4.61469	3.57368
40	27	HPRT1	5.18889	4.13468
40	28	HPRT1	5.66317	4.59576
40	29	HPRT1	6.06605	4.98542
40	30	HPRT1	6.41241	5.31858
40	31	HPRT1	6.71518	5.60815
40	32	HPRT1	6.95708	5.83685
40	33	HPRT1	7.1367	6.00325
40	34	HPRT1	7.31682	6.17017
40	35	HPRT1	7.45531	6.29546
40	36	HPRT1	7.55453	6.38147
40	37	HPRT1	7.69667	6.51041
40	38	HPRT1	7.82709	6.62762
40	39	HPRT1	7.90637	6.6937
40	40	HPRT1	7.92266	6.69679
41	1	HPRT1	0.632666	-0.0131874
41	2	HPRT1	0.648334	-0.00981521
41	3	HPRT1	0.664929	-0.00551618
41	4	HPRT1	0.67999	-0.00275119
41	5	HPRT1	0.693656	-0.00138112
41	6	HPRT1	0.708109	0.00077578
41	7	HPRT1	0.722367	0.002737
41	8	HPRT1	0.736323	0.00439728
41	9	HPRT1	0.74698	0.0027582
41	10	HPRT1	0.761645	0.0051267
41	11	HPRT1	0.772432	0.00361816
41	12	HPRT1	0.781365	0.000254598
41	13	HPRT1	0.790841	-0.00256531
41	14	HPRT1	0.802479	-0.00322359
41	15	HPRT1	0.815313	-0.00268585
41	16	HPRT1	0.82875	-0.00154449
41	17	HPRT1	0.844598	0.00200764
41	18	HPRT1	0.88567	0.030783
41	19	HPRT1	0.944274	0.0770916
41	20	HPRT1	1.04115	0.161676
41	21	HPRT1	1.22752	0.335747
41	22	HPRT1	1.53948	0.635414
41	23	HPRT1	2.0285	1.11214
41	24	HPRT1	2.66002	1.73136
41	25	HPRT1	3.30889	2.36793
41	26	HPRT1	3.8887	2.93545
41	27	HPRT1	4.40243	3.43688
41	28	HPRT1	4.84288	3.86503
41	29	HPRT1	5.20812	4.21798
41	30	HPRT1	5.50901	4.50657
41	31	HPRT1	5.77842	4.76368
41	32	HPRT1	5.9941	4.96707
41	33	HPRT1	6.19211	5.15278
41	34	HPRT1	6.33998	5.28836
41	35	HPRT1	6.48199	5.41807
41	36	HPRT1	6.57122	5.49501
41	37	HPRT1	6.67556	5.58705
41	38	HPRT1	6.81782	5.71701
41	39	HPRT1	6.92369	5.81058
41	40	HPRT1	6.95189	5.82649
42	1	HPRT1	1.12061	-0.0249458
42	2	HPRT1	1.15084	-0.0177383
42	3	HPRT1	1.18788	-0.00371059
42	4	HPRT1	1.21177	-0.00283833
42	5	HPRT1	1.23817	0.000548055
42	6	HPRT1	1.26176	0.00112587
42	7	HPRT1	1.28675	0.00310272
42	8	HPRT1	1.30972	0.00305504
42	9	HPRT1	1.33193	0.00225373
42	10	HPRT1	1.35071	-0.00197736
42	11	HPRT1	1.37578	7.75717e-05
42	12	HPRT1	1.40018	0.0014579
42	13	HPRT1	1.42135	-0.000384471
42	14	HPRT1	1.44676	0.00201355
42	15	HPRT1	1.46741	-0.000359545
42	16	HPRT1	1.48642	-0.00436414
42	17	HPRT1	1.52127	0.00747347
42	18	HPRT1	1.57774	0.0409269
42	19	HPRT1	1.67155	0.111722
42	20	HPRT1	1.83626	0.253418
42	21	HPRT1	2.12019	0.514338
42	22	HPRT1	2.55784	0.928969
42	23	HPRT1	3.1254	1.47352
42	24	HPRT1	3.72663	2.05174
42	25	HPRT1	4.25459	2.55668
42	26	HPRT1	4.70515	2.98422
42	27	HPRT1	5.11661	3.37267
42	28	HPRT1	5.47804	3.71108
42	29	HPRT1	5.7847	3.99472
42	30	HPRT1	6.03887	4.22588
42	31	HPRT1	6.24186	4.40586
42	32	HPRT1	6.40512	4.54611
42	33	HPRT1	6.54936	4.66733
42	34	HPRT1	6.68505	4.78001
42	35	HPRT1	6.78382	4.85576
42	36	HPRT1	6.91075	4.95967
42	37	HPRT1	7.00681	5.03273
42	38	HPRT1	7.10882	5.11172
42	39	HPRT1	7.17391	5.15379
42	40	HPRT1	7.24774	5.20461
43	1	HPRT1	1.06134	-0.00787331
43	2	HPRT1	1.0732	-0.00997089
43	3	HPRT1	1.09569	-0.00143977
43	4	HPRT1	1.11244	0.00134236
43	5	HPRT1	1.12577	0.00071141
43	6	HPRT1	1.14183	0.00281524
43	7	HPRT1	1.15479	0.00181331
43	8	HPRT1	1.16327	-0.0036654
43	9	HPRT1	1.17737	-0.00353103
43	10	HPRT1	1.19274	-0.00211718
43	11	HPRT1	1.20917	0.000343925
43	12	HPRT1	1.22818	0.00539485
43	13	HPRT1	1.23577	-0.000978173
43	14	HPRT1	1.24809	-0.00262049
43	15	HPRT1	1.2666	0.00193094
43	16	HPRT1	1.28063	0.00199868
43	17	HPRT1	1.30777	0.0151754
43	18	HPRT1	1.35711	0.0505564
43	19	HPRT1	1.45243	0.131918
43	20	HPRT1	1.6045	0.270028
43	21	HPRT1	1.86847	0.520039
43	22	HPRT1	2.28375	0.921356
43	23	HPRT1	2.83355	1.45719
43	24	HPRT1	3.41875	2.02843
43	25	HPRT1	3.9395	2.53522
43	26	HPRT1	4.39593	2.97769
43	27	HPRT1	4.80449	3.37229
43	28	HPRT1	5.15023	3.70406
43	29	HPRT1	5.44751	3.98738
43	30	HPRT1	5.68841	4.21433
43	31	HPRT1	5.88571	4.39766
43	32	HPRT1	6.05823	4.55622
43	33	HPRT1	6.17454	4.65857
43	34	HPRT1	6.2884	4.75846
43	35	HPRT1	6.41634	4.87245
43	36	HPRT1	6.50654	4.94869
43	37	HPRT1	6.59555	5.02373
43	38	HPRT1	6.67708	5.09131
43	39	HPRT1	6.73305	5.13331
43	40	HPRT1	6.76532	5.15162
44	1	HPRT1	0.861019	-0.0507586
44	2	HPRT1	0.8784	-0.0343426
44	3	HPRT1	0.899301	-0.0144056
44	4	HPRT1	0.90844	-0.00623051
44	5	HPRT1	0.927014	0.0113792
44	6	HPRT1	0.922657	0.00605802
44	7	HPRT1	0.924397	0.0068339
44	8	HPRT1	0.92687	0.00834214
44	9	HPRT1	0.922768	0.00327617
44	10	HPRT1	0.916591	-0.00386572
44	11	HPRT1	0.915277	-0.00614338
44	12	HPRT1	0.917141	-0.00524424
44	13	HPRT1	0.92799	0.00464054
44	14	HPRT1	0.947653	0.0233392
44	15	HPRT1	0.966922	0.0416439
44	16	HPRT1	0.983021	0.0567794
44	17	HPRT1	1.015	0.087792
44	18	HPRT1	1.11724	0.189071
44	19	HPRT1	1.2907	0.361563
44	20	HPRT1	1.45048	0.520379
44	21	HPRT1	1.71446	0.783397
44	22	HPRT1	2.15395	1.22192
44	23	HPRT1	2.75607	1.82308
44	24	HPRT1	3.41229	2.47833
44	25	HPRT1	4.02869	3.09377
44	26	HPRT1	4.56767	3.63179
44	27	HPRT1	5.02941	4.09256
44	28	HPRT1	5.45158	4.51377
44	29	HPRT1	5.80947	4.87069
44	30	HPRT1	6.08026	5.14052
44	31	HPRT1	6.34173	5.40102
44	32	HPRT1	6.51805	5.57638
44	33	HPRT1	6.67977	5.73714
44	34	HPRT1	6.81467	5.87107
44	35	HPRT1	6.98402	6.03946
44	36	HPRT1	7.1388	6.19327
44	37	HPRT1	7.24971	6.30322
44	38	HPRT1	7.29046	6.34301
44	39	HPRT1	7.35185	6.40343
44	40	HPRT1	7.43991	6.49052
45	1	HPRT1	0.997787	-0.0790912
45	2	HPRT1	1.05463	-0.0415917
45	3	HPRT1	1.10829	-0.00726162
45	4	HPRT1	1.1314	-0.0034993
45	5	HPRT1	1.15923	0.00500028
45	6	HPRT1	1.18343	0.00985742
45	7	HPRT1	1.19263	-0.000280545
45	8	HPRT1	1.2176	0.00535026
45	9	HPRT1	1.2301	-0.0014887
45	10	HPRT1	1.2499	-0.00102288
45	11	HPRT1	1.26825	-0.00202166
45	12	HPRT1	1.28444	-0.00516383
45	13	HPRT1	1.30582	-0.00312921
45	14	HPRT1	1.32387	-0.00441218
45	15	HPRT1	1.35569	0.00807196
45	16	HPRT1	1.37219	0.00522448
45	17	HPRT1	1.40998	0.0236807
45	18	HPRT1	1.47385	0.068206
45	19	HPRT1	1.56886	0.143884
45	20	HPRT1	1.74904	0.304725
45	21	HPRT1	2.07256	0.608907
45	22	HPRT1	2.5874	1.1044
45	23	HPRT1	3.29646	1.79412
45	24	HPRT1	4.11364	2.59197
45	25	HPRT1	4.82875	3.28774
45	26	HPRT1	5.49664	3.93629
45	27	HPRT1	6.04849	4.46881
45	28	HPRT1	6.53397	4.93494
45	29	HPRT1	6.96461	5.34624
45	30	HPRT1	7.30146	5.66376
45	31	HPRT1	7.56499	5.90795
45	32	HPRT1	7.81672	6.14033
45	33	HPRT1	7.9987	6.30297
45	34	HPRT1	8.22476	6.5097
45	35	HPRT1	8.38719	6.65279
45	36	HPRT1	8.53135	6.77761
45	37	HPRT1	8.70105	6.92797
45	38	HPRT1	8.7944	7.00199
45	39	HPRT1	8.93669	7.12493
45	40	HPRT1	8.96608	7.13498
46	1	HPRT1	1.6396	-0.132922
46	2	HPRT1	1.68057	-0.123097
46	3	HPRT1	1.74661	-0.0881935
46	4	HPRT1	1.86962	0.00367809
46	5	HPRT1	1.91985	0.022767
46	6	HPRT1	1.95456	0.0263299
46	7	HPRT1	1.98282	0.023448
46	8	HPRT1	2.01406	0.0235509
46	9	HPRT1	2.03657	0.0149169
46	10	HPRT1	2.06498	0.0121842
46	11	HPRT1	2.09538	0.0114469
46	12	HPRT1	2.11629	0.00120644
46	13	HPRT1	2.13795	-0.00827395
46	14	HPRT1	2.17208	-0.00527788
46	15	HPRT1	2.1935	-0.0150041
46	16	HPRT1	2.21687	-0.022779
46	17	HPRT1	2.26068	-0.0101108
46	18	HPRT1	2.33628	0.0343527
46	19	HPRT1	2.45043	0.117357
46	20	HPRT1	2.64322	0.27901
46	21	HPRT1	2.98223	0.586879
46	22	HPRT1	3.50072	1.07423
46	23	HPRT1	4.13013	1.67249
46	24	HPRT1	4.77956	2.29078
46	25	HPRT1	5.36362	2.8437
46	26	HPRT1	5.86383	3.31277
46	27	HPRT1	6.30784	3.72564
46	28	HPRT1	6.7223	4.10895
46	29	HPRT1	7.02581	4.38133
46	30	HPRT1	7.33398	4.65835
46	31	HPRT1	7.57726	4.87048
46	32	HPRT1	7.80114	5.06323
46	33	HPRT1	7.92297	5.15392
46	34	HPRT1	8.09725	5.29706
46	35	HPRT1	8.26709	5.43575
46	36	HPRT1	8.3879	5.52542
46	37	HPRT1	8.46067	5.56705
46	38	HPRT1	8.57859	5.65382
46	39	HPRT1	8.69999	5.74409
46	40	HPRT1	8.75567	5.76863
47	1	HPRT1	0.947043	-0.0486815
47	2	HPRT1	0.976968	-0.0366994
47	3	HPRT1	1.01978	-0.0118271
47	4	HPRT1	1.04418	-0.00537266
47	5	HPRT1	1.06447	-0.00302888
47	6	HPRT1	1.09166	0.00621485
47	7	HPRT1	1.11297	0.00958527
47	8	HPRT1	1.12748	0.00615193
47	9	HPRT1	1.14522	0.00594654
47	10	HPRT1	1.16388	0.00666573
47	11	HPRT1	1.17588	0.000719103
47	12	HPRT1	1.18994	-0.00315674
47	13	HPRT1	1.20905	-0.00199599
47	14	HPRT1	1.2262	-0.00278765
47	15	HPRT1	1.23982	-0.00711435
47	16	HPRT1	1.2659	0.00102825
47	17	HPRT1	1.3042	0.021381
47	18	HPRT1	1.35576	0.0549972
47	19	HPRT1	1.44808	0.129371
47	20	HPRT1	1.61683	0.28018
47	21	HPRT1	1.90716	0.552572
47	22	HPRT1	2.35934	0.986807
47	23	HPRT1	2.93927	1.54879
47	24	HPRT1	3.51659	2.10817
47	25	HPRT1	4.02791	2.60155
47	26	HPRT1	4.49476	3.05045
47	27	HPRT1	4.91644	3.45419
47	28	HPRT1	5.26798	3.78779
47	29	HPRT1	5.52508	4.02694
47	30	HPRT1	5.76538	4.24929
47	31	HPRT1	5.99412	4.4601
47	32	HPRT1	6.18515	4.63319
47	33	HPRT1	6.33493	4.76502
47	34	HPRT1	6.45635	4.86849
47	35	HPRT1	6.56084	4.95504
47	36	HPRT1	6.6475	5.02376
47	37	HPRT1	6.72993	5.08825
47	38	HPRT1	6.8267	5.16707
47	39	HPRT1	6.88097	5.2034
47	40	HPRT1	6.98517	5.28965
48	1	HPRT1	0.774699	-0.0379027
48	2	HPRT1	0.806181	-0.0232976
48	3	HPRT1	0.840324	-0.00603055
48	4	HPRT1	0.866794	0.00356312
48	5	HPRT1	0.879275	-0.000831758
48	6	HPRT1	0.899822	0.00283865
48	7	HPRT1	0.915155	0.00129567
48	8	HPRT1	0.928177	-0.00255901
48	9	HPRT1	0.947024	-0.000587995
48	10	HPRT1	0.966379	0.00189079
48	11	HPRT1	0.985731	0.00436607
48	12	HPRT1	1.00136	0.00311432
48	13	HPRT1	1.01293	-0.00218411
48	14	HPRT1	1.02712	-0.00487519
48	15	HPRT1	1.04993	0.00105709
48	16	HPRT1	1.07537	0.00962021
48	17	HPRT1	1.10782	0.0252001
48	18	HPRT1	1.164	0.0644979
48	19	HPRT1	1.26581	0.149432
48	20	HPRT1	1.44278	0.309529
48	21	HPRT1	1.73955	0.589421
48	22	HPRT1	2.20916	1.04215
48	23	HPRT1	2.79505	1.61117
48	24	HPRT1	3.3756	2.17485
48	25	HPRT1	3.88827	2.67063
48	26	HPRT1	4.33044	3.09593
48	27	HPRT1	4.7409	3.48951
48	28	HPRT1	5.10675	3.83849
48	29	HPRT1	5.38639	4.10126
48	30	HPRT1	5.61338	4.31136
48	31	HPRT1	5.81488	4.49599
48	32	HPRT1	6.02036	4.68459
48	33	HPRT1	6.17608	4.82344
48	34	HPRT1	6.29403	4.92451
48	35	HPRT1	6.38964	5.00325
48	36	HPRT1	6.49952	5.09625
48	37	HPRT1	6.60067	5.18052
48	38	HPRT1	6.68767	5.25064
48	39	HPRT1	6.74913	5.29523
48	40	HPRT1	6.79816	5.32738
49	1	HPRT1	0.527841	0.00335136
49	2	HPRT1	0.544327	-0.00698735
49	3	HPRT1	0.570101	-0.00803756
49	4	HPRT1	0.602452	-0.00251041
49	5	HPRT1	0.627612	-0.00417509
49	6	HPRT1	0.646562	-0.0120491
49	7	HPRT1	0.668176	-0.0172594
49	8	HPRT1	0.697049	-0.0152111
49	9	HPRT1	0.740578	0.00149326
49	10	HPRT1	0.816245	0.0503361
49	11	HPRT1	0.829818	0.0370844
49	12	HPRT1	0.845122	0.0255642
49	13	HPRT1	0.854849	0.00846678
49	14	HPRT1	0.860346	-0.0128606
49	15	HPRT1	0.878257	-0.0217733
49	16	HPRT1	0.897787	-0.0290681
49	17	HPRT1	0.916451	-0.0372281
49	18	HPRT1	0.958114	-0.0223894
49	19	HPRT1	1.02507	0.017744
49	20	HPRT1	1.13536	0.101203
49	21	HPRT1	1.33912	0.278147
49	22	HPRT1	1.70638	0.618575
49	23	HPRT1	2.25556	1.14093
49	24	HPRT1	2.90592	1.76447
49	25	HPRT1	3.55437	2.38609
49	26	HPRT1	4.11573	2.92064
49	27	HPRT1	4.58574	3.36382
49	28	HPRT1	4.98595	3.7372
49	29	HPRT1	5.33851	4.06294
49	30	HPRT1	5.59498	4.29258
49	31	HPRT1	5.8312	4.50198
49	32	HPRT1	6.01957	4.66352
49	33	HPRT1	6.20424	4.82137
49	34	HPRT1	6.33676	4.92707
49	35	HPRT1	6.47027	5.03375
49	36	HPRT1	6.58901	5.12566
49	37	HPRT1	6.66973	5.17956
49	38	HPRT1	6.76179	5.2448
49	39	HPRT1	6.83842	5.2946
49	40	HPRT1	6.85325	5.28262
50	1	HPRT1	1.77573	-0.0905815
50	2	HPRT1	1.81412	-0.0727354
50	3	HPRT1	1.87763	-0.0297814
50	4	HPRT1	1.92946	0.00150496
[truncated: 13,396 more rows]

## Sheet: Results
Well	Sample Name	Target	CT	Ct Mean	Ct SD	ΔCt	Δ Ct Mean	ΔCt SE	ΔΔ Ct	Fold 2^(-ddCT)		Well	Sample Name	Target	CT	Ct Mean	Ct SD
D1	CY L 13-126 U	EGFR	20.2716	20.363	0.0923651	-1.28908	-1.26663	0.146451	0	1		A1	CY L 13-126 U	HPRT1	21.5607	21.6297	0.236246
E1	CY L 13-126 U	EGFR	20.4563	20.363	0.0923651	-0.979317						B1	CY L 13-126 U	HPRT1	21.4356
F1	CY L 13-126 U	EGFR	20.3612	20.363	0.0923651	-1.5315						C1	CY L 13-126 U	HPRT1	21.8927
D3	CY L 13-126 T	EGFR	20.3782	20.8714	0.478088	-1.02538	-0.370293	0.293677	0.896339	0.537248		A3	CY L 13-126 T	HPRT1	21.4036	21.2417	0.173696
E3	CY L 13-126 T	EGFR	20.903	20.8714	0.478088	-0.155216						B3	CY L 13-126 T	HPRT1	21.0582
F3	CY L 13-126 T	EGFR	21.3329	20.8714	0.478088	0.0697212						C3	CY L 13-126 T	HPRT1	21.2631
D5	CY L 13-125 U	EGFR	20.3564	20.5258	0.327658	-0.72736	-0.539505	0.206719	0.727127	0.604106		A5	CY L 13-125 U	HPRT1	21.0837	21.0653	0.144356
E5	CY L 13-125 U	EGFR	20.3176	20.5258	0.327658	-0.595068						B5	CY L 13-125 U	HPRT1	20.9126
F5	CY L 13-125 U	EGFR	20.9035	20.5258	0.327658	-0.296087						C5	CY L 13-125 U	HPRT1	21.1996
D7	CY L 13-125 T	EGFR	21.3119	21.2182	0.386956	-0.0426559	-0.0378971	0.239292	1.22873	0.426691		A7	CY L 13-125 T	HPRT1	21.3546	21.2561	0.148481
E7	CY L 13-125 T	EGFR	21.5497	21.2182	0.386956	0.464401						B7	CY L 13-125 T	HPRT1	21.0853
F7	CY L 13-125 T	EGFR	20.793	21.2182	0.386956	-0.535437						C7	CY L 13-125 T	HPRT1	21.3285
D9	CY L 13-124 U	EGFR	20.1996	20.4037	0.184867	-0.106287	0.190524	0.133857	1.45716	0.36421		A9	CY L 13-124 U	HPRT1	20.3059	20.2132	0.13992
E9	CY L 13-124 U	EGFR	20.4518	20.4037	0.184867	0.170273						B9	CY L 13-124 U	HPRT1	20.2815
F9	CY L 13-124 U	EGFR	20.5599	20.4037	0.184867	0.507587						C9	CY L 13-124 U	HPRT1	20.0523
D11	CY L 13-124 T	EGFR	20.953	21.0692	0.174825	-0.590971	-0.43859	0.149883	0.828042	0.563293		A11	CY L 13-124 T	HPRT1	21.544	21.5078	0.191914
E11	CY L 13-124 T	EGFR	20.9844	21.0692	0.174825	-0.694674						B11	CY L 13-124 T	HPRT1	21.6791
F11	CY L 13-124 T	EGFR	21.2703	21.0692	0.174825	-0.0301247						C11	CY L 13-124 T	HPRT1	21.3004
D13	CY L 11-38 U	EGFR	19.3724	19.4336	0.124252	-2.30672	-2.03566	0.168782	-0.769029	1.70412		A13	CY L 11-38 U	HPRT1	21.6791	21.4693	0.26462
E13	CY L 11-38 U	EGFR	19.3518	19.4336	0.124252	-2.20485						B13	CY L 11-38 U	HPRT1	21.5567
F13	CY L 11-38 U	EGFR	19.5766	19.4336	0.124252	-1.59541						C13	CY L 11-38 U	HPRT1	21.172
D15	CY L 11-38 T	EGFR	19.3009	19.7367	0.381609	-2.3374	-1.59276	0.299602	-0.326132	1.25365		A15	CY L 11-38 T	HPRT1	21.6383	21.3295	0.351651
E15	CY L 11-38 T	EGFR	19.8985	19.7367	0.381609	-1.50498						B15	CY L 11-38 T	HPRT1	21.4034
F15	CY L 11-38 T	EGFR	20.0108	19.7367	0.381609	-0.935909						C15	CY L 11-38 T	HPRT1	20.9467
D2	CY L 11-30 U	EGFR	19.8329	19.9346	0.159863	-1.64926	-1.70155	0.13507	-0.434918	1.35183		A2	CY L 11-30 U	HPRT1	21.4822	21.6361	0.170807
E2	CY L 11-30 U	EGFR	19.852	19.9346	0.159863	-1.96791						B2	CY L 11-30 U	HPRT1	21.8199
F2	CY L 11-30 U	EGFR	20.1189	19.9346	0.159863	-1.48749						C2	CY L 11-30 U	HPRT1	21.6063
D4	CY L 11-30 T	EGFR	19.9293	20.1075	0.156246	0.755991	0.297126	0.342909	1.56376	0.338269		A4	CY L 11-30 T	HPRT1	19.1733	19.8103	0.573016
E4	CY L 11-30 T	EGFR	20.2214	20.1075	0.156246	-0.0624924						B4	CY L 11-30 T	HPRT1	20.2838
F4	CY L 11-30 T	EGFR	20.1717	20.1075	0.156246	0.19788						C4	CY L 11-30 T	HPRT1	19.9738
D6	CY D 13-55 U	EGFR	19.9383	20.2377	0.265805	-0.636885	-0.198657	0.17566	1.06797	0.476988		A6	CY D 13-55 U	HPRT1	20.5752	20.4363	0.148042
E6	CY D 13-55 U	EGFR	20.4459	20.2377	0.265805	0.165375						B6	CY D 13-55 U	HPRT1	20.2806
F6	CY D 13-55 U	EGFR	20.3288	20.2377	0.265805	-0.124462						C6	CY D 13-55 U	HPRT1	20.4533
D8	CY D 13-55 T	EGFR	20.953	21.188	0.23108	0.597973	0.587138	0.214108	1.85377	0.276668		A8	CY D 13-55 T	HPRT1	20.355	20.6009	0.29005
E8	CY D 13-55 T	EGFR	21.4149	21.188	0.23108	0.887985						B8	CY D 13-55 T	HPRT1	20.5269
F8	CY D 13-55 T	EGFR	21.1962	21.188	0.23108	0.275455						C8	CY D 13-55 T	HPRT1	20.9208
D10	CY D 11-29 U	EGFR	20.1058	20.2642	0.261984	-1.79985	-1.64674	0.162909	-0.380103	1.30144		A10	CY D 11-29 U	HPRT1	21.9057	21.9109	0.104795
E10	CY D 11-29 U	EGFR	20.1201	20.2642	0.261984	-1.8981						B10	CY D 11-29 U	HPRT1	22.0182
F10	CY D 11-29 U	EGFR	20.5666	20.2642	0.261984	-1.24226						C10	CY D 11-29 U	HPRT1	21.8089
D12	CY D 11-29 T	EGFR	22.2983	22.6422	0.309015	0.60733	1.20855	0.265773	2.47518	0.179844		A12	CY D 11-29 T	HPRT1	21.691	21.4337	0.341197
E12	CY D 11-29 T	EGFR	22.7318	22.6422	0.309015	1.1684						B12	CY D 11-29 T	HPRT1	21.5634
F12	CY D 11-29 T	EGFR	22.8966	22.6422	0.309015	1.84992						C12	CY D 11-29 T	HPRT1	21.0467
D14	CY D 11-18 U	EGFR	21.7146	21.0509	0.61609	0.729736	0.215187	0.378579	1.48182	0.358037		A14	CY D 11-18 U	HPRT1	20.9849	20.8357	0.224499
E14	CY D 11-18 U	EGFR	20.4973	21.0509	0.61609	-0.447453						B14	CY D 11-18 U	HPRT1	20.9447
F14	CY D 11-18 U	EGFR	20.9408	21.0509	0.61609	0.363277						C14	CY D 11-18 U	HPRT1	20.5775
D16	CY D 11-18 T	EGFR	21.168	21.2254	0.0871388	0.0642872	0.10463	0.110097	1.37126	0.386553		A16	CY D 11-18 T	HPRT1	21.1037	21.1208	0.16962
E16	CY D 11-18 T	EGFR	21.1825	21.2254	0.0871388	-0.115746						B16	CY D 11-18 T	HPRT1	21.2983
F16	CY D 11-18 T	EGFR	21.3257	21.2254	0.0871388	0.365349						C16	CY D 11-18 T	HPRT1	20.9603
D17	CY B 13-68 U	EGFR	18.9279	18.4987	0.385625	-2.3172	-2.91736	0.308888	-1.65073	3.13993		A17	CY B 13-68 U	HPRT1	21.2451	21.4161	0.37085
E17	CY B 13-68 U	EGFR	18.1813	18.4987	0.385625	-3.66027						B17	CY B 13-68 U	HPRT1	21.8416
F17	CY B 13-68 U	EGFR	18.3869	18.4987	0.385625	-2.77462						C17	CY B 13-68 U	HPRT1	21.1616
D19	CY B 13-68 T	EGFR	19.1467	20.8046	2.54156	-1.80408	-0.204084	1.4686	1.06255	0.478786		A19	CY B 13-68 T	HPRT1	20.9508	21.0087	0.103931
E19	CY B 13-68 T	EGFR	19.5364	20.8046	2.54156	-1.59224						B19	CY B 13-68 T	HPRT1	21.1287
F19	CY B 13-68 T	EGFR	23.7307	20.8046	2.54156	2.78407						C19	CY B 13-68 T	HPRT1	20.9467
D21	CY B 12-40 U	EGFR	18.0294	18.878	1.02218	-3.19505	-2.18622	0.596447	-0.919584	1.89157		A21	CY B 12-40 U	HPRT1	21.2245	21.0643	0.149676
E21	CY B 12-40 U	EGFR	18.5919	18.878	1.02218	-2.33607						B21	CY B 12-40 U	HPRT1	20.928
F21	CY B 12-40 U	EGFR	20.0128	18.878	1.02218	-1.02753						C21	CY B 12-40 U	HPRT1	21.0403
D23	CY B 12-40 T	EGFR	21.1672	20.1745	1.14914	0.216877	-0.966622	0.68214	0.30001	0.812247		A23	CY B 12-40 T	HPRT1	20.9503	21.1411	0.274648
E23	CY B 12-40 T	EGFR	20.4407	20.1745	1.14914	-0.576475						B23	CY B 12-40 T	HPRT1	21.0171
F23	CY B 12-40 T	EGFR	18.9156	20.1745	1.14914	-2.54027						C23	CY B 12-40 T	HPRT1	21.4559
D18	CY A 11-16 U	EGFR	19.7973	19.9881	0.179242	-0.750162	-0.778426	0.215073	0.488206	0.712911		A18	CY A 11-16 U	HPRT1	20.5474	20.7665	0.32656
E18	CY A 11-16 U	EGFR	20.1529	19.9881	0.179242	-0.988937						B18	CY A 11-16 U	HPRT1	21.1418
F18	CY A 11-16 U	EGFR	20.0141	19.9881	0.179242	-0.596178						C18	CY A 11-16 U	HPRT1	20.6103
D20	CY A 11-16 T	EGFR	20.0421	20.0638	0.0928426	-1.17612	-0.738146	0.280599	0.528486	0.693282		A20	CY A 11-16 T	HPRT1	21.2182	20.8019	0.477062
E20	CY A 11-16 T	EGFR	20.1655	20.0638	0.0928426	-0.115814						B20	CY A 11-16 T	HPRT1	20.2814
F20	CY A 11-16 T	EGFR	19.9837	20.0638	0.0928426	-0.922503						C20	CY A 11-16 T	HPRT1	20.9062
D22	CY A 11-14 U	EGFR	20.4336	19.792	0.951914	-0.663937	-1.26188	0.551187	0.00475629	0.996709		A22	CY A 11-14 U	HPRT1	21.0975	21.0539	0.0726735
E22	CY A 11-14 U	EGFR	18.6983	19.792	0.951914	-2.27171						B22	CY A 11-14 U	HPRT1	20.97
F22	CY A 11-14 U	EGFR	20.2442	19.792	0.951914	-0.849985						C22	CY A 11-14 U	HPRT1	21.0942
D24	CY A 11-14 T	EGFR	22.0437	20.6308	1.62348	1.13682	-0.325167	0.937719	0.941465	0.520704		A24	CY A 11-14 T	HPRT1	20.9069	20.956	0.0475224
E24	CY A 11-14 T	EGFR	18.8574	20.6308	1.62348	-2.1019						B24	CY A 11-14 T	HPRT1	20.9593
F24	CY A 11-14 T	EGFR	20.9913	20.6308	1.62348	-0.0104198						C24	CY A 11-14 T	HPRT1	21.0018
G1	CY L 13-126 U	ERBB2	21.8479	21.7495	0.10314	0.287233	0.119867	0.148829	0	1
H1	CY L 13-126 U	ERBB2	21.7585	21.7495	0.10314	0.322893
I1	CY L 13-126 U	ERBB2	21.6422	21.7495	0.10314	-0.250526
G3	CY L 13-126 T	ERBB2	21.6568	21.9151	0.240262	0.253191	0.673435	0.171169	0.553568	0.681333
H3	CY L 13-126 T	ERBB2	22.132	21.9151	0.240262	1.07373									0	1
I3	CY L 13-126 T	ERBB2	21.9565	21.9151	0.240262	0.693386
G5	CY L 13-125 U	ERBB2	21.724	21.7607	0.0968132	0.640278	0.695398	0.100352	0.575531	0.671039
H5	CY L 13-125 U	ERBB2	21.8705	21.7607	0.0968132	0.957876									0.553568	0.681333				Sample	Target	Δ Δ Ct untreated	FOLD	Δ Δ Ct Cisplatin	FOLD
I5	CY L 13-125 U	ERBB2	21.6876	21.7607	0.0968132	0.488039														CY L 13-126	EGFR	0	1	0.896339	0.537248
G7	CY L 13-125 T	ERBB2	21.8923	21.8349	0.170505	0.537699	0.578818	0.130536	0.458951	0.727515										CY L 13-125		0.727127	0.604106	1.22873	0.426691
H7	CY L 13-125 T	ERBB2	21.6432	21.8349	0.170505	0.557825									0.575531	0.671039				CY L 13-124		1.45716	0.36421	0.828042	0.563293
I7	CY L 13-125 T	ERBB2	21.9694	21.8349	0.170505	0.64093														CY L 11-38		-0.769029	1.70412	-0.326132	1.25365
G9	CY L 13-124 U	ERBB2	21.6065	21.5918	0.0281509	1.30064	1.3786	0.0824013	1.25874	0.417909										CY L 11-30		-0.434918	1.35183	1.56376	0.338269
H9	CY L 13-124 U	ERBB2	21.5594	21.5918	0.0281509	1.27787									0.458951	0.727515				CY D 13-55		1.06797	0.476988	1.85377	0.276668
I9	CY L 13-124 U	ERBB2	21.6096	21.5918	0.0281509	1.55731														CY D 11-29		-0.380103	1.30144	2.47518	0.179844
G11	CY L 13-124 T	ERBB2	20.9122	21.751	0.733559	-0.631758	0.243189	0.437775	0.123323	0.918071										CY D 11-18		1.48182	0.358037	1.37126	0.386553
H11	CY L 13-124 T	ERBB2	22.0684	21.751	0.733559	0.389317									1.25874	0.417909				CY B 13-68		-1.65073	3.13993	1.06255	0.478786
I11	CY L 13-124 T	ERBB2	22.2724	21.751	0.733559	0.97201														CY B 12-40		-0.919584	1.89157	0.30001	0.812247
G13	CY L 11-38 U	ERBB2	21.0779	21.1485	0.0625925	-0.601171	-0.320809	0.156994	-0.440676	1.35724										CY A 11-16		0.488206	0.712911	0.528486	0.693282
H13	CY L 11-38 U	ERBB2	21.17	21.1485	0.0625925	-0.386686														CY A 11-14		0.00475629	0.996709	0.941465	0.520704
I13	CY L 11-38 U	ERBB2	21.1974	21.1485	0.0625925	0.0254307
G15	CY L 11-38 T	ERBB2	21.1282	21.2366	0.156933	-0.510126	-0.0928904	0.222326	-0.212757	1.1589										CY L 13-126	ERBB2	0	1	0.553568	0.681333
H15	CY L 11-38 T	ERBB2	21.1651	21.2366	0.156933	-0.238354														CY L 13-125		0.575531	0.671039	0.458951	0.727515
I15	CY L 11-38 T	ERBB2	21.4165	21.2366	0.156933	0.469809														CY L 13-124		1.25874	0.417909	0.123323	0.918071
G2	CY L 11-30 U	ERBB2	21.6282	21.7606	0.33254	0.146021	0.124416	0.215838	0.00454966	0.996851										CY L 11-38		-0.440676	1.35724	-0.212757	1.1589
H2	CY L 11-30 U	ERBB2	21.5146	21.7606	0.33254	-0.305321														CY L 11-30		0.00454966	0.996851	0.0958284	0.935735
I2	CY L 11-30 U	ERBB2	22.1389	21.7606	0.33254	0.532549														CY D 13-55		1.46582	0.362031	1.31234	0.402668
G4	CY L 11-30 T	ERBB2	19.5401	20.026	0.997056	0.366789	0.215695	0.663945	0.0958284	0.935735										CY D 11-29		0.246333	0.843037	-2.43864	5.42132
H4	CY L 11-30 T	ERBB2	19.3651	20.026	0.997056	-0.918776														CY D 11-18		1.41212	0.375758	1.00585	0.497976
I4	CY L 11-30 T	ERBB2	21.1729	20.026	0.997056	1.19907														CY B 13-68		-0.0668348	1.04742	0.0317682	0.978221
G6	CY D 13-55 U	ERBB2	21.9235	22.022	0.207006	1.34837	1.58568	0.146933	1.46582	0.362031										CY B 12-40		-0.153625	1.11236	-0.682558	1.60498
H6	CY D 13-55 U	ERBB2	21.8826	22.022	0.207006	1.60208														CY A 11-16 U		0.473838	0.720046	0.561	0.677832
I6	CY D 13-55 U	ERBB2	22.2599	22.022	0.207006	1.8066														CY A 11-14 U		1.15973	0.447596	0.977938	0.507705
G8	CY D 13-55 T	ERBB2	22.318	22.0331	0.260904	1.96303	1.4322	0.225241	1.31234	0.402668
H8	CY D 13-55 T	ERBB2	21.9754	22.0331	0.260904	1.44848
I8	CY D 13-55 T	ERBB2	21.8059	22.0331	0.260904	0.885101
G10	CY D 11-29 U	ERBB2	21.8983	22.2771	0.328272	-0.00740623	0.366199	0.198951	0.246333	0.843037
H10	CY D 11-29 U	ERBB2	22.4555	22.2771	0.328272	0.4373
I10	CY D 11-29 U	ERBB2	22.4776	22.2771	0.328272	0.668705
G12	CY D 11-29 T	ERBB2	13.7928	23.8635			2.55851		-2.43864	5.42132
H12	CY D 11-29 T	ERBB2	23.8071			2.24372
I12	CY D 11-29 T	ERBB2	23.92			2.8733
G14	CY D 11-18 U	ERBB2	22.164	22.3677	0.188877	1.17912	1.53199	0.169385	1.41212	0.375758
H14	CY D 11-18 U	ERBB2	22.4021	22.3677	0.188877	1.45733
I14	CY D 11-18 U	ERBB2	22.537	22.3677	0.188877	1.95952
G16	CY D 11-18 T	ERBB2	22.108	22.2465	0.226562	1.00422	1.12572	0.163403	1.00585	0.497976
H16	CY D 11-18 T	ERBB2	22.1236	22.2465	0.226562	0.825306
I16	CY D 11-18 T	ERBB2	22.508	22.2465	0.226562	1.54762
G17	CY B 13-68 U	ERBB2	21.3736	21.4691	0.105505	0.128511	0.0530319	0.222607	-0.0668348	1.04742
H17	CY B 13-68 U	ERBB2	21.5823	21.4691	0.105505	-0.259224
I17	CY B 13-68 U	ERBB2	21.4514	21.4691	0.105505	0.289808
G19	CY B 13-68 T	ERBB2	20.9674	21.1603	0.172677	0.0166054	0.151635	0.11636	0.0317682	0.978221
H19	CY B 13-68 T	ERBB2	21.2133	21.1603	0.172677	0.0846481
I19	CY B 13-68 T	ERBB2	21.3003	21.1603	0.172677	0.353651
G21	CY B 12-40 U	ERBB2	20.9838	21.0305	0.0838273	-0.240629	-0.0337588	0.0990454	-0.153625	1.11236
H21	CY B 12-40 U	ERBB2	20.9804	21.0305	0.0838273	0.0523968
I21	CY B 12-40 U	ERBB2	21.1273	21.0305	0.0838273	0.086956
G23	CY B 12-40 T	ERBB2	21.2835	20.5784	1.53783	0.333202	-0.562691	0.901915	-0.682558	1.60498
H23	CY B 12-40 T	ERBB2	21.6373	20.5784	1.53783	0.620142
I23	CY B 12-40 T	ERBB2	18.8145	20.5784	1.53783	-2.64142
G18	CY A 11-16 U	ERBB2	21.2535	21.3602	0.0927846	0.706036	0.593705	0.196002	0.473838	0.720046
H18	CY A 11-16 U	ERBB2	21.4214	21.3602	0.0927846	0.279566
I18	CY A 11-16 U	ERBB2	21.4058	21.3602	0.0927846	0.795513
G20	CY A 11-16 T	ERBB2	21.4729	21.4828	0.154751	0.254652	0.680867	0.28956	0.561	0.677832
H20	CY A 11-16 T	ERBB2	21.3332	21.4828	0.154751	1.05188
I20	CY A 11-16 T	ERBB2	21.6423	21.4828	0.154751	0.736069
G22	CY A 11-14 U	ERBB2	22.1519	22.3335	0.19002	1.05439	1.2796	0.117458	1.15973	0.447596
H22	CY A 11-14 U	ERBB2	22.3176	22.3335	0.19002	1.34763
I22	CY A 11-14 U	ERBB2	22.531	22.3335	0.19002	1.43677
G24	CY A 11-14 T	ERBB2	21.762	22.0538	0.415908	0.855062	1.0978	0.241687	0.977938	0.507705
H24	CY A 11-14 T	ERBB2	21.8694	22.0538	0.415908	0.910109
I24	CY A 11-14 T	ERBB2	22.53	22.0538	0.415908	1.52824
P22		ERBB2	Undetermined
P23		EGFR	Undetermined
P24		HPRT1	35.5044
Singleplex
HPRT1
95.0
CY L 13-126 U

## Sheet: Results-recalc
Well	Sample Name	Target	CT	Ct Mean	Ct SD	ΔCt	Δ Ct Mean	ΔCt SE	ΔΔ Ct	Fold 2^(-ddCT)		Well	Sample Name	Target	CT	Ct Mean	Ct SD
D1	CY L 13-126 U	EGFR	20.2716	20.363	0.0923651	-1.28908	-1.26663	0.146451	0	1		A1	CY L 13-126 U	HPRT1	21.5607	21.6297	0.236246
E1	CY L 13-126 U	EGFR	20.4563			-0.979317						B1	CY L 13-126 U	HPRT1	21.4356
F1	CY L 13-126 U	EGFR	20.3612			-1.5315						C1	CY L 13-126 U	HPRT1	21.8927
D3	CY L 13-126 T	EGFR	20.3782	20.8714	0.478088	-1.02538	-0.370293	0.293677	0.896339	0.537248		A3	CY L 13-126 T	HPRT1	21.4036	21.2417	0.173696
E3	CY L 13-126 T	EGFR	20.903			-0.155216						B3	CY L 13-126 T	HPRT1	21.0582
F3	CY L 13-126 T	EGFR	21.3329			0.0697212						C3	CY L 13-126 T	HPRT1	21.2631
D5	CY L 13-125 U	EGFR	20.3564	20.5258	0.327658	-0.72736	-0.539505	0.206719	0.727127	0.604106		A5	CY L 13-125 U	HPRT1	21.0837	21.0653	0.144356
E5	CY L 13-125 U	EGFR	20.3176			-0.595068						B5	CY L 13-125 U	HPRT1	20.9126
F5	CY L 13-125 U	EGFR	20.9035			-0.296087						C5	CY L 13-125 U	HPRT1	21.1996
D7	CY L 13-125 T	EGFR	21.3119	21.2182	0.386956	-0.0426559	-0.0378971	0.239292	1.22873	0.426691		A7	CY L 13-125 T	HPRT1	21.3546	21.2561	0.148481
E7	CY L 13-125 T	EGFR	21.5497			0.464401						B7	CY L 13-125 T	HPRT1	21.0853
F7	CY L 13-125 T	EGFR	20.793			-0.535437						C7	CY L 13-125 T	HPRT1	21.3285
D9	CY L 13-124 U	EGFR	20.1996	20.4037	0.184867	-0.106287	0.190524	0.133857	1.45716	0.36421		A9	CY L 13-124 U	HPRT1	20.3059	20.2132	0.13992
E9	CY L 13-124 U	EGFR	20.4518			0.170273						B9	CY L 13-124 U	HPRT1	20.2815
F9	CY L 13-124 U	EGFR	20.5599			0.507587						C9	CY L 13-124 U	HPRT1	20.0523
D11	CY L 13-124 T	EGFR	20.953	21.0692	0.174825	-0.590971	-0.43859	0.149883	0.828042	0.563293		A11	CY L 13-124 T	HPRT1	21.544	21.5078	0.191914
E11	CY L 13-124 T	EGFR	20.9844			-0.694674						B11	CY L 13-124 T	HPRT1	21.6791
F11	CY L 13-124 T	EGFR	21.2703			-0.0301247						C11	CY L 13-124 T	HPRT1	21.3004
D13	CY L 11-38 U	EGFR	19.3724	19.4336	0.124252	-2.30672	-2.03566	0.168782	-0.769029	1.70412		A13	CY L 11-38 U	HPRT1	21.6791	21.4693	0.26462
E13	CY L 11-38 U	EGFR	19.3518			-2.20485						B13	CY L 11-38 U	HPRT1	21.5567
F13	CY L 11-38 U	EGFR	19.5766			-1.59541						C13	CY L 11-38 U	HPRT1	21.172
D15	CY L 11-38 T	EGFR	19.3009	19.7367	0.381609	-2.3374	-1.59276	0.299602	-0.326132	1.25365		A15	CY L 11-38 T	HPRT1	21.6383	21.3295	0.351651
E15	CY L 11-38 T	EGFR	19.8985			-1.50498						B15	CY L 11-38 T	HPRT1	21.4034
F15	CY L 11-38 T	EGFR	20.0108			-0.935909						C15	CY L 11-38 T	HPRT1	20.9467
D2	CY L 11-30 U	EGFR	19.8329	19.9346	0.159863	-1.64926	-1.70155	0.13507	-0.434918	1.35183		A2	CY L 11-30 U	HPRT1	21.4822	21.6361	0.170807
E2	CY L 11-30 U	EGFR	19.852			-1.96791						B2	CY L 11-30 U	HPRT1	21.8199
F2	CY L 11-30 U	EGFR	20.1189			-1.48749						C2	CY L 11-30 U	HPRT1	21.6063
D4	CY L 11-30 T	EGFR	19.9293	20.1075	0.156246	0.755991	0.297126	0.342909	1.56376	0.338269		A4	CY L 11-30 T	HPRT1	19.1733	19.8103	0.573016
E4	CY L 11-30 T	EGFR	20.2214			-0.0624924						B4	CY L 11-30 T	HPRT1	20.2838
F4	CY L 11-30 T	EGFR	20.1717			0.19788						C4	CY L 11-30 T	HPRT1	19.9738
D6	CY D 13-55 U	EGFR	19.9383	20.2377	0.265805	-0.636885	-0.198657	0.17566	1.06797	0.476988		A6	CY D 13-55 U	HPRT1	20.5752	20.4363	0.148042
E6	CY D 13-55 U	EGFR	20.4459			0.165375						B6	CY D 13-55 U	HPRT1	20.2806
F6	CY D 13-55 U	EGFR	20.3288			-0.124462						C6	CY D 13-55 U	HPRT1	20.4533
D8	CY D 13-55 T	EGFR	20.953	21.188	0.23108	0.597973	0.587138	0.214108	1.85377	0.276668		A8	CY D 13-55 T	HPRT1	20.355	20.6009	0.29005
E8	CY D 13-55 T	EGFR	21.4149			0.887985						B8	CY D 13-55 T	HPRT1	20.5269
F8	CY D 13-55 T	EGFR	21.1962			0.275455						C8	CY D 13-55 T	HPRT1	20.9208
D10	CY D 11-29 U	EGFR	20.1058	20.2642	0.261984	-1.79985	-1.64674	0.162909	-0.380103	1.30144		A10	CY D 11-29 U	HPRT1	21.9057	21.9109	0.104795
E10	CY D 11-29 U	EGFR	20.1201			-1.8981						B10	CY D 11-29 U	HPRT1	22.0182
F10	CY D 11-29 U	EGFR	20.5666			-1.24226						C10	CY D 11-29 U	HPRT1	21.8089
D12	CY D 11-29 T	EGFR	22.2983	22.6422	0.309015	0.60733	1.20855	0.265773	2.47518	0.179844		A12	CY D 11-29 T	HPRT1	21.691	21.4337	0.341197
E12	CY D 11-29 T	EGFR	22.7318			1.1684						B12	CY D 11-29 T	HPRT1	21.5634
F12	CY D 11-29 T	EGFR	22.8966			1.84992						C12	CY D 11-29 T	HPRT1	21.0467
D14	CY D 11-18 U	EGFR	21.7146	21.0509	0.61609	0.729736	0.215187	0.378579	1.48182	0.358037		A14	CY D 11-18 U	HPRT1	20.9849	20.8357	0.224499
E14	CY D 11-18 U	EGFR	20.4973			-0.447453						B14	CY D 11-18 U	HPRT1	20.9447
F14	CY D 11-18 U	EGFR	20.9408			0.363277						C14	CY D 11-18 U	HPRT1	20.5775
D16	CY D 11-18 T	EGFR	21.168	21.2254	0.0871388	0.0642872	0.10463	0.110097	1.37126	0.386553		A16	CY D 11-18 T	HPRT1	21.1037	21.1208	0.16962
E16	CY D 11-18 T	EGFR	21.1825			-0.115746						B16	CY D 11-18 T	HPRT1	21.2983
F16	CY D 11-18 T	EGFR	21.3257			0.365349						C16	CY D 11-18 T	HPRT1	20.9603
D17	CY B 13-68 U	EGFR	18.9279	18.4987	0.385625	-2.3172	-2.91736	0.308888	-1.65073	3.13993		A17	CY B 13-68 U	HPRT1	21.2451	21.4161	0.37085
E17	CY B 13-68 U	EGFR	18.1813			-3.66027						B17	CY B 13-68 U	HPRT1	21.8416
F17	CY B 13-68 U	EGFR	18.3869			-2.77462						C17	CY B 13-68 U	HPRT1	21.1616
D19	CY B 13-68 T	EGFR	19.1467	19.3416	0.19488	-1.80408	-1.69816	0.105919	0.431528	1.34866		A19	CY B 13-68 T	HPRT1	20.9508	21.0087	0.103931
E19	CY B 13-68 T	EGFR	19.5364			-1.59224						B19	CY B 13-68 T	HPRT1	21.1287
F19	CY B 13-68 T	EGFR	23.7307									C19	CY B 13-68 T	HPRT1	20.9467
D21	CY B 12-40 U	EGFR	18.0294	18.3107	0.281255	-3.19505	-2.76556	0.429488	1.49893	2.82632		A21	CY B 12-40 U	HPRT1	21.2245	21.0643	0.149676
E21	CY B 12-40 U	EGFR	18.5919			-2.33607						B21	CY B 12-40 U	HPRT1	20.928
F21	CY B 12-40 U	EGFR	20.0128									C21	CY B 12-40 U	HPRT1	21.0403
D23	CY B 12-40 T	EGFR	21.1672	20.8039	0.363256	0.216877	-0.179799	0.396676	-1.08683	0.470794		A23	CY B 12-40 T	HPRT1	20.9503	21.1411	0.274648
E23	CY B 12-40 T	EGFR	20.4407			-0.576475						B23	CY B 12-40 T	HPRT1	21.0171
F23	CY B 12-40 T	EGFR	18.9156									C23	CY B 12-40 T	HPRT1	21.4559
D18	CY A 11-16 U	EGFR	19.7973	19.9881	0.179242	-0.750162	-0.778426	0.215073	0.488206	0.712911		A18	CY A 11-16 U	HPRT1	20.5474	20.7665	0.32656
E18	CY A 11-16 U	EGFR	20.1529		0.179242	-0.988937						B18	CY A 11-16 U	HPRT1	21.1418
F18	CY A 11-16 U	EGFR	20.0141		0.179242	-0.596178						C18	CY A 11-16 U	HPRT1	20.6103
D20	CY A 11-16 T	EGFR	20.0421	20.0638	0.0928426	-1.17612	-0.738146	0.280599	0.528486	0.693282		A20	CY A 11-16 T	HPRT1	21.2182	20.8019	0.477062
E20	CY A 11-16 T	EGFR	20.1655		0.0928426	-0.115814						B20	CY A 11-16 T	HPRT1	20.2814
F20	CY A 11-16 T	EGFR	19.9837		0.0928426	-0.922503						C20	CY A 11-16 T	HPRT1	20.9062
D22	CY A 11-14 U	EGFR	20.4336	20.3389	0.0946913	-0.663937	-0.756961	0.0930243	-0.509671	0.702382		A22	CY A 11-14 U	HPRT1	21.0975	21.0539	0.0726735
E22	CY A 11-14 U	EGFR	18.6983									B22	CY A 11-14 U	HPRT1	20.97
F22	CY A 11-14 U	EGFR	20.2442			-0.849985						C22	CY A 11-14 U	HPRT1	21.0942
D24	CY A 11-14 T	EGFR	22.0437	21.5175	0.526184	1.13682	0.563201	0.573621	-1.82983	0.281297		A24	CY A 11-14 T	HPRT1	20.9069	20.956	0.0475224
E24	CY A 11-14 T	EGFR	18.8574									B24	CY A 11-14 T	HPRT1	20.9593
F24	CY A 11-14 T	EGFR	20.9913			-0.0104198						C24	CY A 11-14 T	HPRT1	21.0018
G1	CY L 13-126 U	ERBB2	21.8479	21.7495	0.10314	0.287233	0.119867	0.148829	0	1
H1	CY L 13-126 U	ERBB2	21.7585			0.322893
I1	CY L 13-126 U	ERBB2	21.6422			-0.250526
G3	CY L 13-126 T	ERBB2	21.6568	21.9151	0.240262	0.253191	0.673435	0.171169	0.553568	0.681333
H3	CY L 13-126 T	ERBB2	22.132			1.07373
I3	CY L 13-126 T	ERBB2	21.9565			0.693386
G5	CY L 13-125 U	ERBB2	21.724	21.7607	0.0968132	0.640278	0.695398	0.100352	0.575531	0.671039
H5	CY L 13-125 U	ERBB2	21.8705			0.957876
I5	CY L 13-125 U	ERBB2	21.6876			0.488039
G7	CY L 13-125 T	ERBB2	21.8923	21.8349	0.170505	0.537699	0.578818	0.130536	0.458951	0.727515
H7	CY L 13-125 T	ERBB2	21.6432			0.557825
I7	CY L 13-125 T	ERBB2	21.9694			0.64093
G9	CY L 13-124 U	ERBB2	21.6065	21.5918	0.0281509	1.30064	1.3786	0.0824013	1.25874	0.417909
H9	CY L 13-124 U	ERBB2	21.5594			1.27787
I9	CY L 13-124 U	ERBB2	21.6096			1.55731
G11	CY L 13-124 T	ERBB2	20.9122	21.751	0.733559	-0.631758	0.243189	0.437775	0.123323	0.918071
H11	CY L 13-124 T	ERBB2	22.0684			0.389317
I11	CY L 13-124 T	ERBB2	22.2724			0.97201
G13	CY L 11-38 U	ERBB2	21.0779	21.1485	0.0625925	-0.601171	-0.320809	0.156994	-0.440676	1.35724
H13	CY L 11-38 U	ERBB2	21.17			-0.386686
I13	CY L 11-38 U	ERBB2	21.1974			0.0254307
G15	CY L 11-38 T	ERBB2	21.1282	21.2366	0.156933	-0.510126	-0.0928904	0.222326	-0.212757	1.1589
H15	CY L 11-38 T	ERBB2	21.1651			-0.238354
I15	CY L 11-38 T	ERBB2	21.4165			0.469809
G2	CY L 11-30 U	ERBB2	21.6282	21.7606	0.33254	0.146021	0.124416	0.215838	0.00454966	0.996851
H2	CY L 11-30 U	ERBB2	21.5146			-0.305321
I2	CY L 11-30 U	ERBB2	22.1389			0.532549
G4	CY L 11-30 T	ERBB2	19.5401	19.4526	0.087532	0.366789	-0.275993	0.909031	-0.990639	0.503255
H4	CY L 11-30 T	ERBB2	19.3651			-0.918776
I4	CY L 11-30 T	ERBB2	21.1729
G6	CY D 13-55 U	ERBB2	21.9235	22.022	0.207006	1.34837	1.58568	0.146933	1.46582	0.362031
H6	CY D 13-55 U	ERBB2	21.8826			1.60208
I6	CY D 13-55 U	ERBB2	22.2599			1.8066
G8	CY D 13-55 T	ERBB2	22.318	22.0331	0.260904	1.96303	1.4322	0.225241	1.31234	0.402668
H8	CY D 13-55 T	ERBB2	21.9754			1.44848
I8	CY D 13-55 T	ERBB2	21.8059			0.885101
G10	CY D 11-29 U	ERBB2	21.8983	22.2771	0.328272	-0.00740623	0.366199	0.198951	0.246333	0.843037
H10	CY D 11-29 U	ERBB2	22.4555			0.4373
I10	CY D 11-29 U	ERBB2	22.4776			0.668705
G12	CY D 11-29 T	ERBB2	13.7928	23.8635			2.55851		-2.43864	5.42132
H12	CY D 11-29 T	ERBB2	23.8071			2.24372
I12	CY D 11-29 T	ERBB2	23.92			2.8733
G14	CY D 11-18 U	ERBB2	22.164	22.3677	0.188877	1.17912	1.53199	0.169385	1.41212	0.375758
H14	CY D 11-18 U	ERBB2	22.4021			1.45733
I14	CY D 11-18 U	ERBB2	22.537			1.95952
G16	CY D 11-18 T	ERBB2	22.108	22.2465	0.226562	1.00422	1.12572	0.163403	1.00585	0.497976
H16	CY D 11-18 T	ERBB2	22.1236			0.825306
I16	CY D 11-18 T	ERBB2	22.508			1.54762
G17	CY B 13-68 U	ERBB2	21.3736	21.4691	0.105505	0.128511	0.0530319	0.222607	-0.0668348	1.04742
H17	CY B 13-68 U	ERBB2	21.5823			-0.259224
I17	CY B 13-68 U	ERBB2	21.4514			0.289808
G19	CY B 13-68 T	ERBB2	20.9674	21.1603	0.172677	0.0166054	0.151635	0.11636	0.0317682	0.978221
H19	CY B 13-68 T	ERBB2	21.2133			0.0846481
I19	CY B 13-68 T	ERBB2	21.3003			0.353651
G21	CY B 12-40 U	ERBB2	20.9838	21.0305	0.0838273	-0.240629	-0.0337588	0.0990454	-0.153625	1.11236
H21	CY B 12-40 U	ERBB2	20.9804			0.0523968
I21	CY B 12-40 U	ERBB2	21.1273			0.086956
G23	CY B 12-40 T	ERBB2	21.2835	21.4604	0.250161	0.333202	0.476672	0.202897	-1.7433	0.298685
H23	CY B 12-40 T	ERBB2	21.6373			0.620142
I23	CY B 12-40 T	ERBB2	18.8145
G18	CY A 11-16 U	ERBB2	21.2535	21.3602	0.0927846	0.706036	0.593705	0.196002	0.473838	0.720046
H18	CY A 11-16 U	ERBB2	21.4214	21.3602	0.0927846	0.279566
I18	CY A 11-16 U	ERBB2	21.4058	21.3602	0.0927846	0.795513
G20	CY A 11-16 T	ERBB2	21.4729	21.4828	0.154751	0.254652	0.680867	0.28956	0.561	0.677832
H20	CY A 11-16 T	ERBB2	21.3332	21.4828	0.154751	1.05188
I20	CY A 11-16 T	ERBB2	21.6423	21.4828	0.154751	0.736069
G22	CY A 11-14 U	ERBB2	22.1519	22.3335	0.19002	1.05439	1.2796	0.117458	1.15973	0.447596
H22	CY A 11-14 U	ERBB2	22.3176	22.3335	0.19002	1.34763
I22	CY A 11-14 U	ERBB2	22.531	22.3335	0.19002	1.43677
G24	CY A 11-14 T	ERBB2	21.762	22.0538	0.415908	0.855062	1.0978	0.241687	0.977938	0.507705
H24	CY A 11-14 T	ERBB2	21.8694	22.0538	0.415908	0.910109
I24	CY A 11-14 T	ERBB2	22.53	22.0538	0.415908	1.52824
P22		ERBB2	Undetermined
P23		EGFR	Undetermined
P24		HPRT1	35.5044
Singleplex
HPRT1
95.0
CY L 13-126 U
	indicates removed triplicate due to high SD, recalculation of subsequent means, errors, and fold (2^(ddCT) no negative

## Sheet: Sheet2
Sample Name	Target	Δ Ct Mean	Δ Δ Ct untreated	Fold 2^(-ddCT)	Δ Ct Mean	Δ Δ Ct Cisplatin	Fold 2^(-ddCT)
CY L 13-126	EGFR	-1.26663	0	1	-0.370293	0.896339	0.537248
CY L 13-125	EGFR	-0.539505	0.727127	0.604106	-0.0378971	1.22873	0.426691
CY L 13-124	EGFR	0.190524	1.45716	0.36421	-0.43859	0.828042	0.563293
CY L 11-38	EGFR	-2.03566	-0.769029	1.70412	-1.59276	-0.326132	1.25365
CY L 11-30	EGFR	-1.70155	-0.434918	1.35183	0.297126	1.56376	0.338269
CY D 13-55	EGFR	-0.198657	1.06797	0.476988	0.587138	1.85377	0.276668
CY D 11-29	EGFR	-1.64674	-0.380103	1.30144	1.20855	2.47518	0.179844
CY D 11-18	EGFR	0.215187	1.48182	0.358037	0.10463	1.37126	0.386553
CY B 13-68	EGFR	-2.91736	-1.65073	3.13993	-1.69816	0.431528	1.34866
CY B 12-40	EGFR	-2.76556	1.49893	2.82632	-0.179799	-1.08683	0.470794
CY A 11-16	EGFR	-0.778426	0.488206	0.712911	-0.738146	0.528486	0.693282
CY A 11-14	EGFR	-0.756961	-0.509671	0.702382	0.563201	-1.82983	0.281297
Sample Name	Target	Δ Ct Mean	Δ Δ Ct untreated	Fold 2^(-ddCT)	Δ Ct Mean	Δ Δ Ct Cisplatin	Fold 2^(-ddCT)
CY L 13-126	ERBB2	0.119867	0	1	0.673435	0.553568	0.681333
CY L 13-125	ERBB2	0.695398	0.575531	0.671039	0.578818	0.458951	0.727515
CY L 13-124	ERBB2	1.3786	1.25874	0.417909	0.243189	0.123323	0.918071
CY L 11-38	ERBB2	-0.320809	-0.440676	1.35724	-0.0928904	-0.212757	1.1589
CY L 11-30	ERBB2	0.124416	0.00454966	0.996851	-0.275993	-0.990639	0.503255
CY D 13-55	ERBB2	1.58568	1.46582	0.362031	1.4322	1.31234	0.402668
CY D 11-29	ERBB2	0.366199	0.246333	0.843037	2.55851	-2.43864	5.42132
CY D 11-18	ERBB2	1.53199	1.41212	0.375758	1.12572	1.00585	0.497976
CY B 13-68	ERBB2	0.0530319	-0.0668348	1.04742	0.151635	0.0317682	0.978221
CY B 12-40	ERBB2	-0.0337588	-0.153625	1.11236	0.476672	-1.7433	0.298685
CY A 11-16	ERBB2	0.593705	0.473838	0.720046	0.680867	0.561	0.677832
CY A 11-14	ERBB2	1.2796	1.15973	0.447596	1.0978	0.977938	0.507705

## Sheet: Melt Curve Raw Data
Block Type	384-Well Block
Calibration Background is expired	No
Calibration Background performed on	2016-02-12 13:07:10 PM PST
Calibration FAM is expired	Yes
Calibration FAM performed on	2016-02-12 14:10:50 PM PST
Calibration NED is expired	Yes
Calibration NED performed on	2014-11-24 13:16:28 PM PST
Calibration ROI is expired	No
Calibration ROI performed on	2016-02-12 12:57:08 PM PST
Calibration ROX is expired	Yes
Calibration ROX performed on	2016-02-12 14:26:17 PM PST
Calibration SYBR is expired	Yes
Calibration SYBR performed on	2016-02-12 14:49:42 PM PST
Calibration TAMRA is expired	Yes
Calibration TAMRA performed on	2016-02-12 14:38:45 PM PST
Calibration Uniformity is expired	No
Calibration Uniformity performed on	2016-02-12 13:16:49 PM PST
Calibration VIC is expired	Yes
Calibration VIC performed on	2016-02-12 14:01:38 PM PST
Chemistry	SYBR_GREEN
Experiment Barcode
Experiment Comments
Experiment File Name	F:\2016-11-28 102413 EGFR ERBB2 HPRT1 BALD.eds
Experiment Name	2016-11-28 102413 EGFR ERBB2 HPRT1 BALD
Experiment Run Start Time	2016-11-28 11:20:14 AM PST
Experiment Run Stop Time	2016-11-28 13:07:44 PM PST
Experiment Type	Comparative Cт (ΔΔCт)
Experiment User Name	SHARI
Instrument Name	278880281
Instrument Serial Number	278880281
Instrument Type	ViiA(TM) 7 System
Passive Reference	ROX
Quantification Cycle Method	Ct
Signal Smoothing On	true
Stage/ Cycle where Analysis is performed	Stage 2, Step 2
Well	Well Position	Reading	Temperature	Fluorescence	Derivative
1	A1	1	60.1871	6.76131	0.487437
1	A1	2	60.4557	6.75769	0.48693
1	A1	3	60.7243	6.70729	0.488825
1	A1	4	60.993	6.66285	0.493187
1	A1	5	61.2616	6.62499	0.499007
1	A1	6	61.5302	6.54996	0.504314
1	A1	7	61.7988	6.53851	0.506948
1	A1	8	62.0674	6.43934	0.505623
1	A1	9	62.3361	6.37677	0.500807
1	A1	10	62.6047	6.3649	0.494733
1	A1	11	62.8733	6.2758	0.490523
1	A1	12	63.1419	6.26017	0.490742
1	A1	13	63.4105	6.21305	0.496262
1	A1	14	63.6791	6.16525	0.506002
1	A1	15	63.9478	6.10981	0.517584
1	A1	16	64.2164	6.03574	0.52849
1	A1	17	64.485	5.97787	0.537011
1	A1	18	64.7536	5.99152	0.542687
1	A1	19	65.0222	5.81503	0.546087
1	A1	20	65.2909	5.83594	0.548202
1	A1	21	65.5595	5.78669	0.549833
1	A1	22	65.8281	5.71649	0.551242
1	A1	23	66.0967	5.63199	0.552348
1	A1	24	66.3653	5.59898	0.553124
1	A1	25	66.634	5.54651	0.553938
1	A1	26	66.9026	5.48775	0.555505
1	A1	27	67.1712	5.39502	0.558521
1	A1	28	67.4398	5.39753	0.563135
1	A1	29	67.7084	5.31729	0.568603
1	A1	30	67.9771	5.25649	0.573326
1	A1	31	68.2457	5.17467	0.575272
1	A1	32	68.5143	5.15614	0.572756
1	A1	33	68.7829	5.07964	0.565275
1	A1	34	69.0515	4.9698	0.554072
1	A1	35	69.3202	4.96989	0.542059
1	A1	36	69.5888	4.89757	0.532934
1	A1	37	69.8574	4.84385	0.529709
1	A1	38	70.126	4.80371	0.53333
1	A1	39	70.3946	4.77927	0.542093
1	A1	40	70.6633	4.70303	0.552335
1	A1	41	70.9319	4.62012	0.560028
1	A1	42	71.2005	4.56389	0.562467
1	A1	43	71.4691	4.50994	0.559233
1	A1	44	71.7377	4.44783	0.552118
1	A1	45	72.0063	4.4028	0.544271
1	A1	46	72.275	4.33423	0.539088
1	A1	47	72.5436	4.27804	0.539101
1	A1	48	72.8122	4.26465	0.545173
1	A1	49	73.0808	4.19552	0.556182
1	A1	50	73.3494	4.13027	0.569464
1	A1	51	73.6181	4.06156	0.581812
1	A1	52	73.8867	4.01716	0.590659
1	A1	53	74.1553	3.92364	0.594767
1	A1	54	74.4239	3.87511	0.594207
1	A1	55	74.6925	3.81744	0.589848
1	A1	56	74.9612	3.75786	0.582837
1	A1	57	75.2298	3.70204	0.574415
1	A1	58	75.4984	3.6062	0.565954
1	A1	59	75.767	3.58674	0.558848
1	A1	60	76.0356	3.51654	0.554109
1	A1	61	76.3043	3.50205	0.551994
1	A1	62	76.5729	3.40139	0.552173
1	A1	63	76.8415	3.35603	0.554668
1	A1	64	77.1101	3.29431	0.561124
1	A1	65	77.3787	3.23977	0.575804
1	A1	66	77.6474	3.20713	0.605855
1	A1	67	77.916	3.11669	0.660885
1	A1	68	78.1846	3.09474	0.751999
1	A1	69	78.4532	3.02699	0.890301
1	A1	70	78.7218	2.95056	1.08455
1	A1	71	78.9904	2.8538	1.3376
1	A1	72	79.2591	2.73241	1.64181
1	A1	73	79.5277	2.58359	1.97497
1	A1	74	79.7963	2.36747	2.29906
1	A1	75	80.0649	2.06113	2.56466
1	A1	76	80.3335	1.65198	2.72154
1	A1	77	80.6022	1.21623	2.73274
1	A1	78	80.8708	0.80794	2.5868
1	A1	79	81.1394	0.493161	2.30271
1	A1	80	81.408	0.303863	1.92498
1	A1	81	81.6766	0.192452	1.51074
1	A1	82	81.9453	0.139882	1.11429
1	A1	83	82.2139	0.120101	0.77501
1	A1	84	82.4825	0.119003	0.512034
1	A1	85	82.7511	0.112108	0.325971
1	A1	86	83.0197	0.103795	0.205083
1	A1	87	83.2884	0.0898345	0.132543
1	A1	88	83.557	0.0857598	0.0921084
1	A1	89	83.8256	0.087419	0.0710949
1	A1	90	84.0942	0.0792869	0.0609457
1	A1	91	84.3628	0.0755688	0.0564313
1	A1	92	84.6315	0.0630197	0.0545099
1	A1	93	84.9001	0.0668358	0.053441
1	A1	94	85.1687	0.0582206	0.0522933
1	A1	95	85.4373	0.0451639	0.0507175
1	A1	96	85.7059	0.0466041	0.0487964
1	A1	97	85.9745	0.0370825	0.0468442
1	A1	98	86.2432	0.0452745	0.0451505
1	A1	99	86.5118	0.0243432	0.0437635
1	A1	100	86.7804	0.0314249	0.0424387
1	A1	101	87.049	0.0174273	0.0407919
1	A1	102	87.3176	0.0133837	0.038564
1	A1	103	87.5863	0.0127418	0.0358177
1	A1	104	87.8549	0.0111457	0.0329313
1	A1	105	88.1235	0.00919515	0.0304012
1	A1	106	88.3921	0.00468134	0.0285993
1	A1	107	88.6607	0.00271922	0.0276435
1	A1	108	88.9294	0.00264968	0.0274327
1	A1	109	89.198	-0.00480877	0.0277745
1	A1	110	89.4666	-0.00379577	0.0284872
1	A1	111	89.7352	-0.0137067	0.0294261
1	A1	112	90.0038	-0.000615382	0.0304691
1	A1	113	90.2725	-0.0220376	0.0315241
1	A1	114	90.5411	-0.0192585	0.0325574
1	A1	115	90.8097	-0.0233467	0.0335736
1	A1	116	91.0783	-0.0176685	0.0345126
1	A1	117	91.3469	-0.0321622	0.0351447
1	A1	118	91.6156	-0.0325931	0.0351035
1	A1	119	91.8842	-0.0408172	0.0340876
1	A1	120	92.1528	-0.0456039	0.0320903
1	A1	121	92.4214	-0.0351951	0.0294615
1	A1	122	92.69	-0.0519426	0.0267436
1	A1	123	92.9586	-0.0455639	0.0243922
1	A1	124	93.2273	-0.0528128	0.0225546
1	A1	125	93.4959	-0.0446198	0.0210176
1	A1	126	93.7645	-0.0580431	0.0193409
1	A1	127	94.0331	-0.0580022	0.0171127
1	A1	128	94.3018	-0.0620115	0.0141983
1	A1	129	94.5704	-0.0567669	0.0108346
1	A1	130	94.839	-0.0576048	0.00750714
2	A2	1	60.1871	7.17042	0.53793
2	A2	2	60.4557	7.11953	0.529132
2	A2	3	60.7243	7.11457	0.522171
2	A2	4	60.993	7.06298	0.519205
2	A2	5	61.2616	7.01998	0.521149
2	A2	6	61.5302	6.99663	0.527638
2	A2	7	61.7988	6.91132	0.537683
2	A2	8	62.0674	6.81718	0.550251
2	A2	9	62.3361	6.84178	0.564211
2	A2	10	62.6047	6.77844	0.577825
2	A2	11	62.8733	6.726	0.588683
2	A2	12	63.1419	6.59608	0.594479
2	A2	13	63.4105	6.59188	0.594192
2	A2	14	63.6791	6.52617	0.58884
2	A2	15	63.9478	6.45489	0.581203
2	A2	16	64.2164	6.38927	0.574763
2	A2	17	64.485	6.38893	0.57228
2	A2	18	64.7536	6.27611	0.574684
2	A2	19	65.0222	6.28716	0.580756
2	A2	20	65.2909	6.20038	0.587894
2	A2	21	65.5595	6.1437	0.593677
2	A2	22	65.8281	6.06399	0.597302
2	A2	23	66.0967	5.99602	0.599813
2	A2	24	66.3653	5.97339	0.602932
2	A2	25	66.634	5.91487	0.60729
2	A2	26	66.9026	5.88148	0.611496
2	A2	27	67.1712	5.78301	0.612902
2	A2	28	67.4398	5.69947	0.609441
2	A2	29	67.7084	5.67209	0.601165
2	A2	30	67.9771	5.59458	0.590361
2	A2	31	68.2457	5.55647	0.580313
2	A2	32	68.5143	5.49086	0.573671
2	A2	33	68.7829	5.4809	0.571514
2	A2	34	69.0515	5.39566	0.573509
2	A2	35	69.3202	5.30977	0.578704
2	A2	36	69.5888	5.30296	0.586184
2	A2	37	69.8574	5.22786	0.595155
2	A2	38	70.126	5.17322	0.604682
2	A2	39	70.3946	5.13216	0.613551
2	A2	40	70.6633	5.01534	0.620478
2	A2	41	70.9319	5.02394	0.624573
2	A2	42	71.2005	4.92655	0.625647
2	A2	43	71.4691	4.83185	0.624204
2	A2	44	71.7377	4.824	0.621098
2	A2	45	72.0063	4.77019	0.617168
2	A2	46	72.275	4.66655	0.612994
2	A2	47	72.5436	4.62953	0.608929
2	A2	48	72.8122	4.57806	0.605258
2	A2	49	73.0808	4.52539	0.602434
2	A2	50	73.3494	4.44586	0.601207
2	A2	51	73.6181	4.3981	0.602583
2	A2	52	73.8867	4.34944	0.60746
2	A2	53	74.1553	4.28363	0.615952
2	A2	54	74.4239	4.24273	0.626751
2	A2	55	74.6925	4.16457	0.637027
2	A2	56	74.9612	4.12711	0.643213
2	A2	57	75.2298	4.02034	0.642408
2	A2	58	75.4984	3.94255	0.633683
2	A2	59	75.767	3.90781	0.618578
2	A2	60	76.0356	3.86179	0.600677
2	A2	61	76.3043	3.78609	0.584674
2	A2	62	76.5729	3.74021	0.575504
2	A2	63	76.8415	3.68162	0.577791
2	A2	64	77.1101	3.65906	0.595685
2	A2	65	77.3787	3.61071	0.633231
2	A2	66	77.6474	3.54063	0.695345
2	A2	67	77.916	3.47381	0.789065
2	A2	68	78.1846	3.40441	0.924048
2	A2	69	78.4532	3.33553	1.11098
2	A2	70	78.7218	3.24852	1.35723
2	A2	71	78.9904	3.14641	1.66044
2	A2	72	79.2591	3.00819	2.00244
2	A2	73	79.5277	2.80878	2.34678
2	A2	74	79.7963	2.52149	2.64256
2	A2	75	80.0649	2.12871	2.83535
2	A2	76	80.3335	1.72246	2.88209
2	A2	77	80.6022	1.29714	2.7648
2	A2	78	80.8708	0.969151	2.49723
2	A2	79	81.1394	0.748502	2.12145
2	A2	80	81.408	0.626358	1.69548
2	A2	81	81.6766	0.576951	1.27742
2	A2	82	81.9453	0.539586	0.911752
2	A2	83	82.2139	0.523995	0.622566
2	A2	84	82.4825	0.520064	0.414127
2	A2	85	82.7511	0.508194	0.276651
2	A2	86	83.0197	0.49318	0.193698
2	A2	87	83.2884	0.4918	0.148282
2	A2	88	83.557	0.472577	0.126364
2	A2	89	83.8256	0.47071	0.117849
2	A2	90	84.0942	0.457606	0.116048
2	A2	91	84.3628	0.450245	0.116651
2	A2	92	84.6315	0.435618	0.11692
2	A2	93	84.9001	0.410229	0.115278
2	A2	94	85.1687	0.409605	0.111123
2	A2	95	85.4373	0.39564	0.104627
2	A2	96	85.7059	0.391447	0.0964697
2	A2	97	85.9745	0.375369	0.087562
2	A2	98	86.2432	0.36846	0.0788475
2	A2	99	86.5118	0.365696	0.0711412
2	A2	100	86.7804	0.359134	0.0649551
2	A2	101	87.049	0.353973	0.0603551
2	A2	102	87.3176	0.346314	0.0569552
2	A2	103	87.5863	0.343164	0.0541146
2	A2	104	87.8549	0.333459	0.0512608
2	A2	105	88.1235	0.334661	0.0481757
2	A2	106	88.3921	0.32704	0.0451022
2	A2	107	88.6607	0.319483	0.0426314
2	A2	108	88.9294	0.327322	0.0414268
2	A2	109	89.198	0.320347	0.0419052
2	A2	110	89.4666	0.31651	0.0440218
2	A2	111	89.7352	0.307034	0.0472561
2	A2	112	90.0038	0.307523	0.0507899
2	A2	113	90.2725	0.300601	0.0537709
2	A2	114	90.5411	0.284717	0.0555286
2	A2	115	90.8097	0.294551	0.0556854
2	A2	116	91.0783	0.277576	0.0541887
2	A2	117	91.3469	0.275334	0.0512981
2	A2	118	91.6156	0.268046	0.0475284
2	A2	119	91.8842	0.267952	0.043529
2	A2	120	92.1528	0.272109	0.0399165
2	A2	121	92.4214	0.25628	0.0371309
2	A2	122	92.69	0.256175	0.0353667
2	A2	123	92.9586	0.259976	0.0345552
2	A2	124	93.2273	0.252698	0.0343574
2	A2	125	93.4959	0.253985	0.0341808
2	A2	126	93.7645	0.239241	0.0332982
2	A2	127	94.0331	0.237796	0.031085
2	A2	128	94.3018	0.244792	0.0272824
2	A2	129	94.5704	0.230597	0.0221329
2	A2	130	94.839	0.232039	0.0163083
3	A3	1	60.1871	7.31636	0.524703
3	A3	2	60.4557	7.28566	0.514111
3	A3	3	60.7243	7.24104	0.503654
3	A3	4	60.993	7.17711	0.497332
3	A3	5	61.2616	7.14642	0.498429
3	A3	6	61.5302	7.14063	0.507625
3	A3	7	61.7988	7.07106	0.5223
3	A3	8	62.0674	7.01768	0.537759
3	A3	9	62.3361	6.94096	0.549637
3	A3	10	62.6047	6.84524	0.555996
3	A3	11	62.8733	6.83324	0.557763
3	A3	12	63.1419	6.76422	0.557531
3	A3	13	63.4105	6.70938	0.557729
3	A3	14	63.6791	6.66575	0.559466
3	A3	15	63.9478	6.60488	0.562478
3	A3	16	64.2164	6.50573	0.565892
3	A3	17	64.485	6.52874	0.568948
3	A3	18	64.7536	6.36361	0.571309
3	A3	19	65.0222	6.40619	0.572987
3	A3	20	65.2909	6.29148	0.574202
3	A3	21	65.5595	6.25383	0.57545
3	A3	22	65.8281	6.15116	0.577522
3	A3	23	66.0967	6.14986	0.581283
3	A3	24	66.3653	6.05727	0.587143
3	A3	25	66.634	6.03237	0.594527
3	A3	26	66.9026	5.9237	0.601713
3	A3	27	67.1712	5.90066	0.606293
3	A3	28	67.4398	5.82266	0.606132
3	A3	29	67.7084	5.74015	0.600532
3	A3	30	67.9771	5.69471	0.591
3	A3	31	68.2457	5.59812	0.581038
3	A3	32	68.5143	5.56707	0.57471
3	A3	33	68.7829	5.52242	0.5746
3	A3	34	69.0515	5.50423	0.580363
3	A3	35	69.3202	5.40664	0.588932
3	A3	36	69.5888	5.32774	0.596293
3	A3	37	69.8574	5.26499	0.599664
3	A3	38	70.126	5.20885	0.598684
3	A3	39	70.3946	5.14163	0.595016
3	A3	40	70.6633	5.08338	0.590938
3	A3	41	70.9319	5.05417	0.588057
3	A3	42	71.2005	4.97575	0.586824
3	A3	43	71.4691	4.8705	0.586849
3	A3	44	71.7377	4.87561	0.587435
3	A3	45	72.0063	4.79132	0.587949
3	A3	46	72.275	4.72517	0.587978
3	A3	47	72.5436	4.66915	0.58745
3	A3	48	72.8122	4.61155	0.586753
3	A3	49	73.0808	4.5284	0.586596
3	A3	50	73.3494	4.49465	0.58761
3	A3	51	73.6181	4.44571	0.589892
3	A3	52	73.8867	4.36513	0.59289
3	A3	53	74.1553	4.30147	0.5958
3	A3	54	74.4239	4.24754	0.598097
3	A3	55	74.6925	4.161	0.59978
3	A3	56	74.9612	4.13132	0.601124
3	A3	57	75.2298	4.07229	0.602224
3	A3	58	75.4984	3.98147	0.6028
3	A3	59	75.767	3.91847	0.602389
3	A3	60	76.0356	3.89216	0.600823
3	A3	61	76.3043	3.7945	0.598631
3	A3	62	76.5729	3.74505	0.597272
3	A3	63	76.8415	3.67854	0.59916
3	A3	64	77.1101	3.6405	0.607781
3	A3	65	77.3787	3.58323	0.62806
3	A3	66	77.6474	3.48639	0.666976
3	A3	67	77.916	3.45937	0.734024
3	A3	68	78.1846	3.38642	0.840922
3	A3	69	78.4532	3.31735	0.999927
3	A3	70	78.7218	3.24185	1.22044
3	A3	71	78.9904	3.14091	1.50413
3	A3	72	79.2591	2.98651	1.83956
3	A3	73	79.5277	2.8341	2.19843
3	A3	74	79.7963	2.56461	2.53605
3	A3	75	80.0649	2.19561	2.79814
3	A3	76	80.3335	1.76804	2.93334
3	A3	77	80.6022	1.29935	2.90802
3	A3	78	80.8708	0.874335	2.71759
3	A3	79	81.1394	0.566803	2.38916
3	A3	80	81.408	0.375528	1.97414
3	A3	81	81.6766	0.279533	1.53351
3	A3	82	81.9453	0.238951	1.12181
3	A3	83	82.2139	0.210011	0.775785
3	A3	84	82.4825	0.203624	0.51075
3	A3	85	82.7511	0.191817	0.324043
3	A3	86	83.0197	0.183044	0.202217
3	A3	87	83.2884	0.174801	0.128353
3	A3	88	83.557	0.173062	0.087028
3	A3	89	83.8256	0.174081	0.066397
3	A3	90	84.0942	0.174507	0.0581499
3	A3	91	84.3628	0.160094	0.0565838
3	A3	92	84.6315	0.158256	0.0577347
3	A3	93	84.9001	0.154559	0.0589376
3	A3	94	85.1687	0.135164	0.0587061
3	A3	95	85.4373	0.128779	0.0566356
3	A3	96	85.7059	0.13245	0.0531197
3	A3	97	85.9745	0.122065	0.0488905
3	A3	98	86.2432	0.123009	0.0445729
3	A3	99	86.5118	0.116814	0.0404531
3	A3	100	86.7804	0.106183	0.0365349
3	A3	101	87.049	0.110268	0.0327743
3	A3	102	87.3176	0.102568	0.0293005
3	A3	103	87.5863	0.0945408	0.0264483
3	A3	104	87.8549	0.105476	0.0245679
3	A3	105	88.1235	0.104837	0.0237368
3	A3	106	88.3921	0.0958828	0.0236114
3	A3	107	88.6607	0.0876305	0.0235734
3	A3	108	88.9294	0.089703	0.0231049
3	A3	109	89.198	0.0894904	0.0221212
3	A3	110	89.4666	0.0822806	0.0210098
3	A3	111	89.7352	0.0856199	0.0203458
3	A3	112	90.0038	0.0885821	0.020494
3	A3	113	90.2725	0.0815048	0.0213773
3	A3	114	90.5411	0.0784666	0.022553
3	A3	115	90.8097	0.070001	0.0235162
3	A3	116	91.0783	0.0747005	0.0239881
3	A3	117	91.3469	0.0709046	0.0239821
3	A3	118	91.6156	0.064829	0.0236232
3	A3	119	91.8842	0.0712278	0.0228969
3	A3	120	92.1528	0.0614438	0.0215574
3	A3	121	92.4214	0.0570487	0.0192915
3	A3	122	92.69	0.0590083	0.0160251
3	A3	123	92.9586	0.0503164	0.012132
3	A3	124	93.2273	0.0627154	0.00835694
3	A3	125	93.4959	0.0585167	0.00546792
3	A3	126	93.7645	0.0599216	0.00385605
3	A3	127	94.0331	0.0597367	0.00334891
3	A3	128	94.3018	0.0583414	0.00335773
3	A3	129	94.5704	0.0507351	0.00324776
3	A3	130	94.839	0.0557824	0.00267961
4	A4	1	60.1871	7.46334	0.543243
4	A4	2	60.4557	7.43543	0.54252
4	A4	3	60.7243	7.36615	0.539088
4	A4	4	60.993	7.3328	0.5335
4	A4	5	61.2616	7.22477	0.527632
4	A4	6	61.5302	7.21413	0.523723
4	A4	7	61.7988	7.19902	0.523112
4	A4	8	62.0674	7.11996	0.525617
4	A4	9	62.3361	7.05682	0.53005
4	A4	10	62.6047	6.98	0.535236
4	A4	11	62.8733	6.96102	0.540756
4	A4	12	63.1419	6.90172	0.546887
4	A4	13	63.4105	6.84661	0.554122
4	A4	14	63.6791	6.76518	0.562719
4	A4	15	63.9478	6.74968	0.572458
4	A4	16	64.2164	6.64452	0.582534
4	A4	17	64.485	6.61925	0.591585
4	A4	18	64.7536	6.57989	0.59808
4	A4	19	65.0222	6.46723	0.60112
4	A4	20	65.2909	6.40503	0.601084
4	A4	21	65.5595	6.33869	0.599615
4	A4	22	65.8281	6.32402	0.598759
4	A4	23	66.0967	6.24672	0.599875
4	A4	24	66.3653	6.17819	0.603123
4	A4	25	66.634	6.11396	0.60768
4	A4	26	66.9026	6.05212	0.612314
4	A4	27	67.1712	5.99502	0.615856
4	A4	28	67.4398	5.94799	0.617371
4	A4	29	67.7084	5.85067	0.616288
4	A4	30	67.9771	5.7939	0.612519
4	A4	31	68.2457	5.73875	0.606538
4	A4	32	68.5143	5.69164	0.599296
4	A4	33	68.7829	5.60237	0.592031
4	A4	34	69.0515	5.56026	0.586047
4	A4	35	69.3202	5.49652	0.582492
4	A4	36	69.5888	5.44516	0.582124
4	A4	37	69.8574	5.38972	0.58507
4	A4	38	70.126	5.32238	0.590703
4	A4	39	70.3946	5.26574	0.597717
4	A4	40	70.6633	5.21514	0.604472
4	A4	41	70.9319	5.14666	0.609522
4	A4	42	71.2005	5.0592	0.612157
4	A4	43	71.4691	5.02145	0.61264
4	A4	44	71.7377	4.94083	0.611989
4	A4	45	72.0063	4.88499	0.611335
4	A4	46	72.275	4.85006	0.611306
4	A4	47	72.5436	4.75437	0.611797
4	A4	48	72.8122	4.71213	0.612273
4	A4	49	73.0808	4.64028	0.612365
4	A4	50	73.3494	4.57043	0.612307
4	A4	51	73.6181	4.51531	0.612886
4	A4	52	73.8867	4.45989	0.614861
4	A4	53	74.1553	4.38271	0.618284
4	A4	54	74.4239	4.35576	0.622183
4	A4	55	74.6925	4.2655	0.624943
4	A4	56	74.9612	4.18364	0.625184
4	A4	57	75.2298	4.13265	0.622512
4	A4	58	75.4984	4.0571	0.617641
4	A4	59	75.767	4.01603	0.611846
4	A4	60	76.0356	3.94823	0.606302
4	A4	61	76.3043	3.89632	0.601916
4	A4	62	76.5729	3.81541	0.599818
4	A4	63	76.8415	3.75018	0.602106
4	A4	64	77.1101	3.72159	0.612393
4	A4	65	77.3787	3.64996	0.63598
4	A4	66	77.6474	3.59174	0.679946
4	A4	67	77.916	3.54209	0.75333
4	A4	68	78.1846	3.45872	0.867078
4	A4	69	78.4532	3.38823	1.03294
4	A4	70	78.7218	3.31596	1.26039
4	A4	71	78.9904	3.19421	1.55144
4	A4	72	79.2591	3.08131	1.89457
4	A4	73	79.5277	2.8865	2.26042
4	A4	74	79.7963	2.63064	2.60251
4	A4	75	80.0649	2.24006	2.86484
4	A4	76	80.3335	1.79878	2.99541
4	A4	77	80.6022	1.33888	2.96148
4	A4	78	80.8708	0.919261	2.76055
4	A4	79	81.1394	0.605163	2.42225
4	A4	80	81.408	0.421163	2.00004
4	A4	81	81.6766	0.322085	1.55595
4	A4	82	81.9453	0.290191	1.14451
4	A4	83	82.2139	0.260882	0.801696
4	A4	84	82.4825	0.238614	0.541763
4	A4	85	82.7511	0.223577	0.36102
4	A4	86	83.0197	0.221227	0.245163
4	A4	87	83.2884	0.204623	0.176464
4	A4	88	83.557	0.198462	0.138654
4	A4	89	83.8256	0.186871	0.11914
4	A4	90	84.0942	0.177235	0.109301
4	A4	91	84.3628	0.16112	0.103838
4	A4	92	84.6315	0.152822	0.0998513
4	A4	93	84.9001	0.144053	0.0959843
4	A4	94	85.1687	0.133037	0.0917481
4	A4	95	85.4373	0.127123	0.0870872
4	A4	96	85.7059	0.116242	0.08216
4	A4	97	85.9745	0.100994	0.0772354
4	A4	98	86.2432	0.107158	0.0725887
4	A4	99	86.5118	0.09184	0.0683537
4	A4	100	86.7804	0.0878879	0.0644106
4	A4	101	87.049	0.0758117	0.0604214
4	A4	102	87.3176	0.0714454	0.0560274
4	A4	103	87.5863	0.0638936	0.0510897
4	A4	104	87.8549	0.0667918	0.0458108
4	A4	105	88.1235	0.058064	0.0406687
4	A4	106	88.3921	0.053964	0.036227
4	A4	107	88.6607	0.0584303	0.0329404
4	A4	108	88.9294	0.05149	0.0310315
4	A4	109	89.198	0.0489402	0.0304475
4	A4	110	89.4666	0.0481278	0.0308781
4	A4	111	89.7352	0.0452945	0.0318266
4	A4	112	90.0038	0.035056	0.032732
4	A4	113	90.2725	0.0376016	0.0331252
4	A4	114	90.5411	0.0322412	0.0327718
4	A4	115	90.8097	0.0244916	0.0317437
4	A4	116	91.0783	0.0254348	0.0303755
4	A4	117	91.3469	0.0259074	0.0290996
4	A4	118	91.6156	0.0182097	0.0282204
4	A4	119	91.8842	0.0205095	0.0277375
4	A4	120	92.1528	0.0155063	0.0273257
4	A4	121	92.4214	0.0115822	0.0265071
4	A4	122	92.69	0.00398792	0.0249319
4	A4	123	92.9586	0.00741339	0.0225999
4	A4	124	93.2273	0.00258031	0.0198719
4	A4	125	93.4959	0.00451466	0.017245
4	A4	126	93.7645	0.00448852	0.0150327
4	A4	127	94.0331	0.00414048	0.013173
4	A4	128	94.3018	-0.000501879	0.0113111
4	A4	129	94.5704	-0.00962908	0.00910076
4	A4	130	94.839	-0.00121114	0.00649617
5	A5	1	60.1871	7.87244	0.578291
5	A5	2	60.4557	7.84504	0.575174
5	A5	3	60.7243	7.73859	0.570885
5	A5	4	60.993	7.75152	0.566991
5	A5	5	61.2616	7.63204	0.565689
5	A5	6	61.5302	7.64718	0.56866
5	A5	7	61.7988	7.54856	0.576019
5	A5	8	62.0674	7.51271	0.585961
5	A5	9	62.3361	7.43855	0.595428
5	A5	10	62.6047	7.40814	0.601591
5	A5	11	62.8733	7.29941	0.603331
5	A5	12	63.1419	7.22747	0.601794
5	A5	13	63.4105	7.17567	0.599579
5	A5	14	63.6791	7.14111	0.599078
5	A5	15	63.9478	7.1341	0.601246
5	A5	16	64.2164	6.97965	0.605624
5	A5	17	64.485	6.94881	0.611389
5	A5	18	64.7536	6.88364	0.618247
5	A5	19	65.0222	6.83085	0.626297
5	A5	20	65.2909	6.79067	0.635205
5	A5	21	65.5595	6.70157	0.643593
5	A5	22	65.8281	6.63783	0.649409
5	A5	23	66.0967	6.5652	0.650976
5	A5	24	66.3653	6.48908	0.64797
5	A5	25	66.634	6.4294	0.641648
5	A5	26	66.9026	6.36931	0.634307
5	A5	27	67.1712	6.29326	0.628371
5	A5	28	67.4398	6.2712	0.625623
5	A5	29	67.7084	6.16065	0.626706
5	A5	30	67.9771	6.12957	0.630954
5	A5	31	68.2457	6.07225	0.636446
5	A5	32	68.5143	5.99298	0.64048
5	A5	33	68.7829	5.93398	0.640502
5	A5	34	69.0515	5.85596	0.635357
5	A5	35	69.3202	5.78815	0.626221
5	A5	36	69.5888	5.6938	0.616506
5	A5	37	69.8574	5.68452	0.610494
5	A5	38	70.126	5.61224	0.611253
5	A5	39	70.3946	5.58427	0.619037
5	A5	40	70.6633	5.49173	0.631102
5	A5	41	70.9319	5.44594	0.64312
5	A5	42	71.2005	5.35184	0.651257
5	A5	43	71.4691	5.26442	0.653816
5	A5	44	71.7377	5.23638	0.651636
5	A5	45	72.0063	5.14136	0.647296
5	A5	46	72.275	5.10187	0.643783
5	A5	47	72.5436	5.04031	0.643263
5	A5	48	72.8122	4.93847	0.646376
5	A5	49	73.0808	4.94355	0.65219
5	A5	50	73.3494	4.83038	0.658697
5	A5	51	73.6181	4.76785	0.663716
5	A5	52	73.8867	4.69061	0.665784
5	A5	53	74.1553	4.63116	0.664611
5	A5	54	74.4239	4.55763	0.660906
5	A5	55	74.6925	4.49435	0.655772
5	A5	56	74.9612	4.43706	0.650103
5	A5	57	75.2298	4.35559	0.644351
5	A5	58	75.4984	4.29953	0.638697
5	A5	59	75.767	4.23669	0.633401
5	A5	60	76.0356	4.16843	0.629033
5	A5	61	76.3043	4.10006	0.626561
5	A5	62	76.5729	4.05751	0.627367
5	A5	63	76.8415	4.00154	0.633512
5	A5	64	77.1101	3.91178	0.648253
5	A5	65	77.3787	3.86009	0.676724
5	A5	66	77.6474	3.80027	0.726402
5	A5	67	77.916	3.75044	0.807172
5	A5	68	78.1846	3.67561	0.930802
5	A5	69	78.4532	3.58065	1.10943
5	A5	70	78.7218	3.49707	1.35243
5	A5	71	78.9904	3.3889	1.6613
5	A5	72	79.2591	3.23849	2.02342
5	A5	73	79.5277	3.0569	2.40743
5	A5	74	79.7963	2.77198	2.76377
5	A5	75	80.0649	2.37963	3.03283
5	A5	76	80.3335	1.89633	3.15974
5	A5	77	80.6022	1.39778	3.11093
5	A5	78	80.8708	0.979992	2.88578
5	A5	79	81.1394	0.669022	2.51801
5	A5	80	81.408	0.478609	2.06594
5	A5	81	81.6766	0.386332	1.59582
5	A5	82	81.9453	0.347748	1.16478
5	A5	83	82.2139	0.319568	0.809684
5	A5	84	82.4825	0.31312	0.544198
5	A5	85	82.7511	0.298332	0.363106
5	A5	86	83.0197	0.287928	0.250144
5	A5	87	83.2884	0.270061	0.185741
5	A5	88	83.557	0.26399	0.152318
5	A5	89	83.8256	0.247369	0.13666
5	A5	90	84.0942	0.240031	0.130039
5	A5	91	84.3628	0.219145	0.127235
5	A5	92	84.6315	0.212952	0.125339
5	A5	93	84.9001	0.195176	0.122816
5	A5	94	85.1687	0.18348	0.118939
5	A5	95	85.4373	0.170064	0.113512
5	A5	96	85.7059	0.159526	0.106744
5	A5	97	85.9745	0.148387	0.0991507
5	A5	98	86.2432	0.137392	0.0914082
5	A5	99	86.5118	0.134392	0.0841549
5	A5	100	86.7804	0.122372	0.0778018
5	A5	101	87.049	0.112292	0.0724328
5	A5	102	87.3176	0.10915	0.0678432
5	A5	103	87.5863	0.103757	0.0636867
5	A5	104	87.8549	0.0944527	0.0596513
5	A5	105	88.1235	0.0895268	0.0555825
5	A5	106	88.3921	0.086655	0.051516
5	A5	107	88.6607	0.0804843	0.047625
5	A5	108	88.9294	0.0780281	0.0441211
5	A5	109	89.198	0.0755877	0.0411522
5	A5	110	89.4666	0.0661064	0.0387321
5	A5	111	89.7352	0.0719639	0.0367299
5	A5	112	90.0038	0.0625575	0.0349237
5	A5	113	90.2725	0.0571475	0.0330989
5	A5	114	90.5411	0.0577543	0.0311403
5	A5	115	90.8097	0.0538395	0.0290639
5	A5	116	91.0783	0.0508398	0.0269789
5	A5	117	91.3469	0.0507632	0.0250225
5	A5	118	91.6156	0.0467522	0.0233272
5	A5	119	91.8842	0.0426818	0.0220265
5	A5	120	92.1528	0.0421958	0.0212451
5	A5	121	92.4214	0.0458874	0.0210287
5	A5	122	92.69	0.0398891	0.0212431
5	A5	123	92.9586	0.0338705	0.0215375
5	A5	124	93.2273	0.0365807	0.0214411
5	A5	125	93.4959	0.0310417	0.0205562
5	A5	126	93.7645	0.0249797	0.0187293
5	A5	127	94.0331	0.0294382	0.0160972
5	A5	128	94.3018	0.0288845	0.0129964
5	A5	129	94.5704	0.0253348	0.00981357
5	A5	130	94.839	0.0239254	0.00687133
6	A6	1	60.1871	8.92233	0.684683
6	A6	2	60.4557	8.80609	0.683935
6	A6	3	60.7243	8.82571	0.680671
6	A6	4	60.993	8.70508	0.674703
6	A6	5	61.2616	8.65149	0.666794
6	A6	6	61.5302	8.59186	0.658594
6	A6	7	61.7988	8.49442	0.652337
6	A6	8	62.0674	8.48207	0.650388
6	A6	9	62.3361	8.40959	0.654706
6	A6	10	62.6047	8.28917	0.666055
6	A6	11	62.8733	8.26161	0.683228
6	A6	12	63.1419	8.26342	0.702806
6	A6	13	63.4105	8.13433	0.720087
6	A6	14	63.6791	8.00141	0.730987
6	A6	15	63.9478	7.97697	0.733846
6	A6	16	64.2164	7.8531	0.729908
6	A6	17	64.485	7.83815	0.72221
6	A6	18	64.7536	7.75937	0.713788
6	A6	19	65.0222	7.64703	0.706437
6	A6	20	65.2909	7.60749	0.700505
6	A6	21	65.5595	7.55273	0.695554
6	A6	22	65.8281	7.45085	0.691289
6	A6	23	66.0967	7.37947	0.688219
6	A6	24	66.3653	7.32081	0.687678
6	A6	25	66.634	7.27164	0.691228
6	A6	26	66.9026	7.1595	0.699585
6	A6	27	67.1712	7.13206	0.711777
6	A6	28	67.4398	7.08971	0.725118
6	A6	29	67.7084	6.95006	0.736221
6	A6	30	67.9771	6.87826	0.742457
6	A6	31	68.2457	6.80897	0.742943
6	A6	32	68.5143	6.7353	0.738499
6	A6	33	68.7829	6.65882	0.730866
6	A6	34	69.0515	6.61555	0.721985
6	A6	35	69.3202	6.48167	0.713757
6	A6	36	69.5888	6.45182	0.708054
6	A6	37	69.8574	6.35888	0.706468
6	A6	38	70.126	6.31817	0.709624
6	A6	39	70.3946	6.25323	0.716556
6	A6	40	70.6633	6.15709	0.724824
6	A6	41	70.9319	6.10716	0.731527
6	A6	42	71.2005	5.99258	0.734653
6	A6	43	71.4691	5.90915	0.733999
6	A6	44	71.7377	5.87746	0.731156
6	A6	45	72.0063	5.77925	0.728694
6	A6	46	72.275	5.71538	0.729062
6	A6	47	72.5436	5.63155	0.733574
6	A6	48	72.8122	5.57796	0.741832
6	A6	49	73.0808	5.51506	0.751762
6	A6	50	73.3494	5.41989	0.760419
6	A6	51	73.6181	5.32994	0.765318
6	A6	52	73.8867	5.23995	0.765612
6	A6	53	74.1553	5.16215	0.762396
6	A6	54	74.4239	5.12299	0.757819
6	A6	55	74.6925	4.98917	0.753622
6	A6	56	74.9612	4.98027	0.750129
6	A6	57	75.2298	4.88568	0.746399
6	A6	58	75.4984	4.77125	0.741374
6	A6	59	75.767	4.69127	0.73509
6	A6	60	76.0356	4.64621	0.729028
6	A6	61	76.3043	4.58957	0.725547
6	A6	62	76.5729	4.50632	0.727178
6	A6	63	76.8415	4.42805	0.736669
6	A6	64	77.1101	4.35798	0.758021
6	A6	65	77.3787	4.28108	0.797828
6	A6	66	77.6474	4.21179	0.866088
6	A6	67	77.916	4.15234	0.975921
6	A6	68	78.1846	4.05416	1.14198
6	A6	69	78.4532	3.96941	1.37733
6	A6	70	78.7218	3.851	1.68862
6	A6	71	78.9904	3.70867	2.06981
6	A6	72	79.2591	3.51236	2.49625
6	A6	73	79.5277	3.25853	2.92227
6	A6	74	79.7963	2.88003	3.28557
6	A6	75	80.0649	2.38969	3.5198
6	A6	76	80.3335	1.81878	3.57245
6	A6	77	80.6022	1.28586	3.42165
6	A6	78	80.8708	0.856338	3.08467
6	A6	79	81.1394	0.559675	2.6139
6	A6	80	81.408	0.414744	2.08163
6	A6	81	81.6766	0.33992	1.56015
6	A6	82	81.9453	0.307777	1.10472
6	A6	83	82.2139	0.289259	0.744984
6	A6	84	82.4825	0.275129	0.48588
6	A6	85	82.7511	0.26687	0.314828
6	A6	86	83.0197	0.260562	0.210986
6	A6	87	83.2884	0.246189	0.152843
6	A6	88	83.557	0.236399	0.122644
6	A6	89	83.8256	0.229223	0.107829
6	A6	90	84.0942	0.214189	0.100564
6	A6	91	84.3628	0.206837	0.0964733
6	A6	92	84.6315	0.199153	0.093339
6	A6	93	84.9001	0.188141	0.0901482
6	A6	94	85.1687	0.176887	0.0865368
6	A6	95	85.4373	0.16768	0.0825175
6	A6	96	85.7059	0.164398	0.0783177
6	A6	97	85.9745	0.150863	0.0742192
6	A6	98	86.2432	0.151884	0.0703868
6	A6	99	86.5118	0.140375	0.0667514
6	A6	100	86.7804	0.130683	0.0630174
6	A6	101	87.049	0.124158	0.0588048
6	A6	102	87.3176	0.117543	0.0538653
6	A6	103	87.5863	0.113053	0.0482641
6	A6	104	87.8549	0.10959	0.042427
6	A6	105	88.1235	0.108537	0.0370197
6	A6	106	88.3921	0.106856	0.0327089
6	A6	107	88.6607	0.102733	0.0299112
6	A6	108	88.9294	0.1014	0.0286337
6	A6	109	89.198	0.103486	0.0284684
6	A6	110	89.4666	0.0919797	0.0287504
6	A6	111	89.7352	0.0915567	0.028824
6	A6	112	90.0038	0.0856419	0.0283012
6	A6	113	90.2725	0.0876958	0.027179
6	A6	114	90.5411	0.0807113	0.0257517
6	A6	115	90.8097	0.0842624	0.0243766
6	A6	116	91.0783	0.0787236	0.0232436
6	A6	117	91.3469	0.0789768	0.0222858
6	A6	118	91.6156	0.0725986	0.021273
6	A6	119	91.8842	0.0716423	0.0200087
6	A6	120	92.1528	0.0707887	0.0184968
6	A6	121	92.4214	0.0653229	0.0169631
6	A6	122	92.69	0.0736522	0.0157153
6	A6	123	92.9586	0.0635075	0.0149286
6	A6	124	93.2273	0.0686545	0.0145013
6	A6	125	93.4959	0.0648483	0.0140833
6	A6	126	93.7645	0.0570372	0.0132659
6	A6	127	94.0331	0.0612066	0.0118119
6	A6	128	94.3018	0.0581071	0.00977879
6	A6	129	94.5704	0.061436	0.00746659
6	A6	130	94.839	0.0578726	0.00524778
7	A7	1	60.1871	8.82531	0.655174
7	A7	2	60.4557	8.78592	0.655067
7	A7	3	60.7243	8.70059	0.65256
7	A7	4	60.993	8.60213	0.648425
7	A7	5	61.2616	8.58175	0.644367
7	A7	6	61.5302	8.5437	0.641905
7	A7	7	61.7988	8.4423	0.641404
7	A7	8	62.0674	8.35534	0.641932
7	A7	9	62.3361	8.33185	0.642064
7	A7	10	62.6047	8.27484	0.641135
7	A7	11	62.8733	8.12956	0.640104
7	A7	12	63.1419	8.11247	0.641344
7	A7	13	63.4105	8.04059	0.647248
7	A7	14	63.6791	7.99396	0.658388
7	A7	15	63.9478	7.94251	0.672421
7	A7	16	64.2164	7.8703	0.684836
7	A7	17	64.485	7.74112	0.691208
7	A7	18	64.7536	7.69655	0.689749
7	A7	19	65.0222	7.60516	0.682393
7	A7	20	65.2909	7.50554	0.673782
7	A7	21	65.5595	7.52122	0.668734
7	A7	22	65.8281	7.4094	0.669801
7	A7	23	66.0967	7.3657	0.676323
7	A7	24	66.3653	7.29048	0.685389
7	A7	25	66.634	7.20867	0.693838
7	A7	26	66.9026	7.10092	0.699956
7	A7	27	67.1712	7.05055	0.703812
7	A7	28	67.4398	6.98871	0.706408
7	A7	29	67.7084	6.95523	0.708473
7	A7	30	67.9771	6.78115	0.709838
7	A7	31	68.2457	6.78814	0.709619
7	A7	32	68.5143	6.67364	0.706895
7	A7	33	68.7829	6.65098	0.701511
7	A7	34	69.0515	6.51708	0.694544
7	A7	35	69.3202	6.43516	0.688142
7	A7	36	69.5888	6.40063	0.684509
7	A7	37	69.8574	6.3503	0.68463
7	A7	38	70.126	6.29496	0.687609
7	A7	39	70.3946	6.18042	0.69128
7	A7	40	70.6633	6.0808	0.693612
7	A7	41	70.9319	6.04356	0.693864
7	A7	42	71.2005	5.98644	0.692664
7	A7	43	71.4691	5.89714	0.691322
7	A7	44	71.7377	5.81601	0.691018
7	A7	45	72.0063	5.73752	0.692382
7	A7	46	72.275	5.71863	0.695404
7	A7	47	72.5436	5.59887	0.699512
7	A7	48	72.8122	5.5492	0.703773
7	A7	49	73.0808	5.44734	0.707232
7	A7	50	73.3494	5.41529	0.709392
7	A7	51	73.6181	5.31037	0.71061
7	A7	52	73.8867	5.21609	0.712062
7	A7	53	74.1553	5.17445	0.715187
7	A7	54	74.4239	5.10816	0.720742
7	A7	55	74.6925	5.02407	0.727963
7	A7	56	74.9612	4.9388	0.73451
7	A7	57	75.2298	4.89172	0.737364
7	A7	58	75.4984	4.76404	0.734348
7	A7	59	75.767	4.67621	0.725432
7	A7	60	76.0356	4.63562	0.713074
7	A7	61	76.3043	4.5528	0.701531
7	A7	62	76.5729	4.48044	0.695677
7	A7	63	76.8415	4.44053	0.700118
7	A7	64	77.1101	4.34973	0.719202
7	A7	65	77.3787	4.29739	0.757955
7	A7	66	77.6474	4.20079	0.823387
7	A7	67	77.916	4.15548	0.925514
7	A7	68	78.1846	4.0448	1.07724
7	A7	69	78.4532	3.96644	1.29228
7	A7	70	78.7218	3.84674	1.58057
7	A7	71	78.9904	3.72043	1.94151
7	A7	72	79.2591	3.55011	2.35678
7	A7	73	79.5277	3.29811	2.78615
7	A7	74	79.7963	2.961	3.1701
7	A7	75	80.0649	2.47525	3.44101
7	A7	76	80.3335	1.90199	3.54081
7	A7	77	80.6022	1.34238	3.43908
7	A7	78	80.8708	0.887712	3.14388
7	A7	79	81.1394	0.549705	2.70043
7	A7	80	81.408	0.370395	2.17794
7	A7	81	81.6766	0.28168	1.65002
7	A7	82	81.9453	0.24666	1.1766
7	A7	83	82.2139	0.226842	0.793342
7	A7	84	82.4825	0.20978	0.510558
7	A7	85	82.7511	0.207177	0.319276
7	A7	86	83.0197	0.205225	0.200243
7	A7	87	83.2884	0.193305	0.13198
7	A7	88	83.557	0.185889	0.0958867
7	A7	89	83.8256	0.18228	0.0782739
7	A7	90	84.0942	0.175079	0.0702535
7	A7	91	84.3628	0.164545	0.066611
7	A7	92	84.6315	0.163204	0.0645181
7	A7	93	84.9001	0.152076	0.0625247
7	A7	94	85.1687	0.146484	0.0599463
7	A7	95	85.4373	0.139457	0.0565648
7	A7	96	85.7059	0.133075	0.0524903
7	A7	97	85.9745	0.127541	0.0480508
7	A7	98	86.2432	0.125629	0.0436564
7	A7	99	86.5118	0.121041	0.0396616
7	A7	100	86.7804	0.116761	0.0362859
7	A7	101	87.049	0.11062	0.0336123
7	A7	102	87.3176	0.108559	0.0316248
7	A7	103	87.5863	0.109276	0.03022
7	A7	104	87.8549	0.105281	0.0291837
7	A7	105	88.1235	0.101712	0.028195
7	A7	106	88.3921	0.0965522	0.0269219
7	A7	107	88.6607	0.09117	0.0251833
7	A7	108	88.9294	0.0950236	0.0230644
7	A7	109	89.198	0.0905612	0.0208848
7	A7	110	89.4666	0.0893853	0.0190295
7	A7	111	89.7352	0.0901852	0.0177617
7	A7	112	90.0038	0.0869612	0.0171368
7	A7	113	90.2725	0.0829817	0.017047
7	A7	114	90.5411	0.0843812	0.0173265
7	A7	115	90.8097	0.0812306	0.0178267
7	A7	116	91.0783	0.079952	0.0184238
7	A7	117	91.3469	0.077483	0.0189899
7	A7	118	91.6156	0.0749436	0.0193807
7	A7	119	91.8842	0.0715634	0.0194584
7	A7	120	92.1528	0.0722238	0.0191324
7	A7	121	92.4214	0.0677911	0.0183861
7	A7	122	92.69	0.0663199	0.0172758
7	A7	123	92.9586	0.0636703	0.0159006
7	A7	124	93.2273	0.0665443	0.0143585
7	A7	125	93.4959	0.0618733	0.0127074
7	A7	126	93.7645	0.0596892	0.010956
7	A7	127	94.0331	0.0634477	0.00909577
7	A7	128	94.3018	0.0567993	0.00715382
7	A7	129	94.5704	0.0606736	0.00522771
7	A7	130	94.839	0.0593376	0.0034702
8	A8	1	60.1871	7.54924	0.570165
8	A8	2	60.4557	7.59816	0.570396
8	A8	3	60.7243	7.4662	0.569819
8	A8	4	60.993	7.48275	0.567163
8	A8	5	61.2616	7.37183	0.561784
8	A8	6	61.5302	7.35	0.554579
8	A8	7	61.7988	7.20713	0.548092
8	A8	8	62.0674	7.22888	0.545468
8	A8	9	62.3361	7.21986	0.548846
8	A8	10	62.6047	7.08901	0.558123
8	A8	11	62.8733	7.05069	0.571088
8	A8	12	63.1419	7.04514	0.584758
8	A8	13	63.4105	6.92865	0.597106
8	A8	14	63.6791	6.82963	0.607886
8	A8	15	63.9478	6.80903	0.618057
8	A8	16	64.2164	6.78328	0.628275
8	A8	17	64.485	6.70325	0.637715
8	A8	18	64.7536	6.60913	0.644247
8	A8	19	65.0222	6.56021	0.645769
8	A8	20	65.2909	6.4533	0.641637
8	A8	21	65.5595	6.41643	0.633076
8	A8	22	65.8281	6.36108	0.62245
8	A8	23	66.0967	6.2688	0.612089
8	A8	24	66.3653	6.26106	0.603525
8	A8	25	66.634	6.14172	0.597435
8	A8	26	66.9026	6.11951	0.593936
8	A8	27	67.1712	6.02952	0.592771
8	A8	28	67.4398	6.01279	0.593199
8	A8	29	67.7084	5.93049	0.593873
8	A8	30	67.9771	5.86262	0.593016
8	A8	31	68.2457	5.81159	0.589086
8	A8	32	68.5143	5.74462	0.581669
8	A8	33	68.7829	5.68026	0.572182
8	A8	34	69.0515	5.6152	0.56388
8	A8	35	69.3202	5.56319	0.560903
8	A8	36	69.5888	5.53269	0.566493
8	A8	37	69.8574	5.45266	0.581149
8	A8	38	70.126	5.45122	0.601814
8	A8	39	70.3946	5.37716	0.622809
8	A8	40	70.6633	5.26034	0.638271
8	A8	41	70.9319	5.18315	0.644792
8	A8	42	71.2005	5.12668	0.642704
8	A8	43	71.4691	5.08285	0.635358
8	A8	44	71.7377	4.98353	0.627004
8	A8	45	72.0063	4.95027	0.620696
8	A8	46	72.275	4.92267	0.617377
8	A8	47	72.5436	4.81162	0.616372
8	A8	48	72.8122	4.74301	0.616568
8	A8	49	73.0808	4.69515	0.617296
8	A8	50	73.3494	4.63866	0.618464
8	A8	51	73.6181	4.59636	0.620208
8	A8	52	73.8867	4.4885	0.62259
8	A8	53	74.1553	4.44219	0.625583
8	A8	54	74.4239	4.37909	0.629077
8	A8	55	74.6925	4.32354	0.632722
8	A8	56	74.9612	4.25847	0.63569
8	A8	57	75.2298	4.17919	0.636708
8	A8	58	75.4984	4.11491	0.634533
8	A8	59	75.767	4.04637	0.628688
8	A8	60	76.0356	4.00159	0.620094
8	A8	61	76.3043	3.89449	0.611236
8	A8	62	76.5729	3.85576	0.605806
8	A8	63	76.8415	3.83177	0.608095
8	A8	64	77.1101	3.7527	0.622662
8	A8	65	77.3787	3.70041	0.654744
8	A8	66	77.6474	3.62116	0.711284
8	A8	67	77.916	3.57086	0.801866
8	A8	68	78.1846	3.50753	0.938463
8	A8	69	78.4532	3.41425	1.13318
8	A8	70	78.7218	3.34066	1.39369
8	A8	71	78.9904	3.21454	1.71705
8	A8	72	79.2591	3.05754	2.08372
8	A8	73	79.5277	2.84794	2.45495
8	A8	74	79.7963	2.55225	2.77642
8	A8	75	80.0649	2.09826	2.98941
8	A8	76	80.3335	1.61785	3.04685
8	A8	77	80.6022	1.15736	2.9284
8	A8	78	80.8708	0.788237	2.64806
8	A8	79	81.1394	0.533251	2.2506
8	A8	80	81.408	0.395595	1.7983
8	A8	81	81.6766	0.338932	1.35354
8	A8	82	81.9453	0.308109	0.964134
8	A8	83	82.2139	0.284835	0.655919
8	A8	84	82.4825	0.273347	0.43346
8	A8	85	82.7511	0.268976	0.286272
8	A8	86	83.0197	0.257765	0.196758
8	A8	87	83.2884	0.243493	0.14675
8	A8	88	83.557	0.233611	0.121288
8	A8	89	83.8256	0.225645	0.109758
8	A8	90	84.0942	0.218652	0.10536
8	A8	91	84.3628	0.20822	0.10398
8	A8	92	84.6315	0.19345	0.103169
8	A8	93	84.9001	0.175238	0.101507
8	A8	94	85.1687	0.176089	0.0982845
8	A8	95	85.4373	0.160294	0.0933389
8	A8	96	85.7059	0.152488	0.0869446
8	A8	97	85.9745	0.136569	0.0797049
8	A8	98	86.2432	0.134837	0.0723933
8	A8	99	86.5118	0.132939	0.0657286
8	A8	100	86.7804	0.121952	0.0601446
8	A8	101	87.049	0.116204	0.0556785
8	A8	102	87.3176	0.109793	0.052046
8	A8	103	87.5863	0.107616	0.0488417
8	A8	104	87.8549	0.100586	0.0457263
8	A8	105	88.1235	0.0985933	0.0425087
8	A8	106	88.3921	0.0954548	0.0391392
8	A8	107	88.6607	0.0877098	0.035689
8	A8	108	88.9294	0.0871519	0.0323468
8	A8	109	89.198	0.0839677	0.0293939
8	A8	110	89.4666	0.0872874	0.0271141
8	A8	111	89.7352	0.0764077	0.0256554
8	A8	112	90.0038	0.0807614	0.0249248
8	A8	113	90.2725	0.0773507	0.024592
8	A8	114	90.5411	0.0716595	0.0242181
8	A8	115	90.8097	0.0708618	0.0234492
8	A8	116	91.0783	0.0653242	0.0221684
8	A8	117	91.3469	0.0643825	0.0205184
8	A8	118	91.6156	0.0699731	0.0187827
8	A8	119	91.8842	0.0612463	0.0172156
8	A8	120	92.1528	0.0611991	0.0159499
8	A8	121	92.4214	0.0601625	0.0150324
8	A8	122	92.69	0.0582263	0.0145157
8	A8	123	92.9586	0.0547267	0.0144711
8	A8	124	93.2273	0.0604951	0.0148702
8	A8	125	93.4959	0.0577724	0.0154327
8	A8	126	93.7645	0.052181	0.0156239
8	A8	127	94.0331	0.0462673	0.0148804
8	A8	128	94.3018	0.045328	0.0129456
8	A8	129	94.5704	0.0459035	0.0100624
8	A8	130	94.839	0.0518018	0.00686437
9	A9	1	60.1871	7.84411	0.586373
9	A9	2	60.4557	7.8786	0.585166
9	A9	3	60.7243	7.76912	0.583134
9	A9	4	60.993	7.72759	0.580764
9	A9	5	61.2616	7.62545	0.579318
9	A9	6	61.5302	7.67762	0.580303
9	A9	7	61.7988	7.52704	0.584536
9	A9	8	62.0674	7.49375	0.591421
9	A9	9	62.3361	7.46035	0.59891
9	A9	10	62.6047	7.38854	0.604301
9	A9	11	62.8733	7.32049	0.605732
9	A9	12	63.1419	7.24304	0.603531
9	A9	13	63.4105	7.15222	0.600607
9	A9	14	63.6791	7.13752	0.601236
9	A9	15	63.9478	7.09618	0.608793
9	A9	16	64.2164	7.02468	0.62359
9	A9	17	64.485	6.96077	0.642248
9	A9	18	64.7536	6.91908	0.659005
9	A9	19	65.0222	6.83309	0.668355
9	A9	20	65.2909	6.71393	0.667616
9	A9	21	65.5595	6.65998	0.658029
9	A9	22	65.8281	6.59864	0.64387
9	A9	23	66.0967	6.55019	0.630203
9	A9	24	66.3653	6.50105	0.620749
9	A9	25	66.634	6.44406	0.616925
9	A9	26	66.9026	6.34195	0.618173
9	A9	27	67.1712	6.31811	0.622811
9	A9	28	67.4398	6.23259	0.628724
9	A9	29	67.7084	6.21548	0.633832
9	A9	30	67.9771	6.10972	0.636554
9	A9	31	68.2457	6.01868	0.636369
9	A9	32	68.5143	5.99322	0.634037
9	A9	33	68.7829	5.92929	0.631193
9	A9	34	69.0515	5.84536	0.629494
9	A9	35	69.3202	5.81204	0.629853
9	A9	36	69.5888	5.74039	0.632244
9	A9	37	69.8574	5.66174	0.636052
9	A9	38	70.126	5.60086	0.640607
9	A9	39	70.3946	5.56204	0.645551
9	A9	40	70.6633	5.4723	0.650895
9	A9	41	70.9319	5.39615	0.656724
9	A9	42	71.2005	5.36021	0.662792
9	A9	43	71.4691	5.28502	0.66825
9	A9	44	71.7377	5.21489	0.671778
9	A9	45	72.0063	5.13687	0.672116
9	A9	46	72.275	5.07339	0.668738
9	A9	47	72.5436	4.98686	0.662125
9	A9	48	72.8122	4.9444	0.653517
9	A9	49	73.0808	4.8825	0.6443
9	A9	50	73.3494	4.80131	0.635589
9	A9	51	73.6181	4.75168	0.628175
9	A9	52	73.8867	4.67527	0.622753
9	A9	53	74.1553	4.63485	0.620035
9	A9	54	74.4239	4.54498	0.620503
9	A9	55	74.6925	4.51232	0.623937
9	A9	56	74.9612	4.45159	0.629128
9	A9	57	75.2298	4.36964	0.634159
9	A9	58	75.4984	4.31163	0.637228
9	A9	59	75.767	4.23351	0.637613
9	A9	60	76.0356	4.16909	0.636242
9	A9	61	76.3043	4.10919	0.63555
9	A9	62	76.5729	4.07304	0.638847
9	A9	63	76.8415	3.97569	0.649683
9	A9	64	77.1101	3.94138	0.671745
9	A9	65	77.3787	3.86963	0.709466
9	A9	66	77.6474	3.82316	0.769199
9	A9	67	77.916	3.71175	0.860207
9	A9	68	78.1846	3.63981	0.994527
9	A9	69	78.4532	3.59221	1.18481
9	A9	70	78.7218	3.48479	1.43985
9	A9	71	78.9904	3.35575	1.75854
9	A9	72	79.2591	3.1909	2.12403
9	A9	73	79.5277	3.00084	2.50068
9	A9	74	79.7963	2.68708	2.8367
9	A9	75	80.0649	2.26683	3.07369
9	A9	76	80.3335	1.80233	3.1615
9	A9	77	80.6022	1.32073	3.07354
9	A9	78	80.8708	0.907254	2.81634
9	A9	79	81.1394	0.623617	2.42887
9	A9	80	81.408	0.464526	1.97144
9	A9	81	81.6766	0.385925	1.50871
9	A9	82	81.9453	0.349613	1.09361
9	A9	83	82.2139	0.325292	0.757799
9	A9	84	82.4825	0.310706	0.510486
9	A9	85	82.7511	0.29398	0.343788
9	A9	86	83.0197	0.28883	0.240736
9	A9	87	83.2884	0.270058	0.18237
9	A9	88	83.557	0.265553	0.152187
9	A9	89	83.8256	0.24863	0.137901
9	A9	90	84.0942	0.234324	0.131431
9	A9	91	84.3628	0.21902	0.128086
9	A9	92	84.6315	0.208949	0.125557
9	A9	93	84.9001	0.192239	0.122976
9	A9	94	85.1687	0.185881	0.120144
9	A9	95	85.4373	0.172357	0.116992
9	A9	96	85.7059	0.161438	0.113334
9	A9	97	85.9745	0.147368	0.108889
9	A9	98	86.2432	0.138653	0.103448
9	A9	99	86.5118	0.120607	0.0970229
9	A9	100	86.7804	0.115539	0.0898766
9	A9	101	87.049	0.104289	0.0824386
9	A9	102	87.3176	0.0977076	0.0751789
9	A9	103	87.5863	0.0907201	0.0684977
9	A9	104	87.8549	0.087533	0.0626387
9	A9	105	88.1235	0.0877313	0.0576332
9	A9	106	88.3921	0.0743686	0.0533226
9	A9	107	88.6607	0.0674273	0.0494849
9	A9	108	88.9294	0.0702559	0.0459977
9	A9	109	89.198	0.0621039	0.0429078
9	A9	110	89.4666	0.064946	0.040349
9	A9	111	89.7352	0.0549689	0.038388
9	A9	112	90.0038	0.0530535	0.0369364
9	A9	113	90.2725	0.0477318	0.0357882
9	A9	114	90.5411	0.0509268	0.0347318
9	A9	115	90.8097	0.0428254	0.0336525
9	A9	116	91.0783	0.0353995	0.0325712
9	A9	117	91.3469	0.0377269	0.0316007
9	A9	118	91.6156	0.0364553	0.0308285
9	A9	119	91.8842	0.0313623	0.0301864
9	A9	120	92.1528	0.0300124	0.0294134
9	A9	121	92.4214	0.0204292	0.0281801
9	A9	122	92.69	0.0209186	0.0263093
9	A9	123	92.9586	0.0164728	0.0239208
9	A9	124	93.2273	0.0215295	0.0213707
9	A9	125	93.4959	0.0167197	0.0190172
9	A9	126	93.7645	0.013547	0.016986
9	A9	127	94.0331	0.0134062	0.0151065
9	A9	128	94.3018	0.0151324	0.0130569
9	A9	129	94.5704	0.00390769	0.0106095
9	A9	130	94.839	0.00862963	0.00781003
10	A10	1	60.1871	7.55075	0.54552
10	A10	2	60.4557	7.56952	0.557561
10	A10	3	60.7243	7.46255	0.568302
10	A10	4	60.993	7.40443	0.573858
10	A10	5	61.2616	7.32459	0.571862
10	A10	6	61.5302	7.29411	0.562452
10	A10	7	61.7988	7.19399	0.54813
10	A10	8	62.0674	7.15903	0.532717
10	A10	9	62.3361	7.10796	0.520008
10	A10	10	62.6047	7.07008	0.512796
10	A10	11	62.8733	7.00266	0.512485
10	A10	12	63.1419	6.97408	0.519116
10	A10	13	63.4105	6.8712	0.531511
10	A10	14	63.6791	6.88509	0.547387
10	A10	15	63.9478	6.80577	0.563665
10	A10	16	64.2164	6.71176	0.577296
10	A10	17	64.485	6.69321	0.586414
10	A10	18	64.7536	6.57837	0.591146
10	A10	19	65.0222	6.51047	0.593397
10	A10	20	65.2909	6.49956	0.595583
10	A10	21	65.5595	6.42886	0.599142
10	A10	22	65.8281	6.37138	0.603768
10	A10	23	66.0967	6.27053	0.607802
10	A10	24	66.3653	6.22663	0.609308
10	A10	25	66.634	6.16525	0.607092
10	A10	26	66.9026	6.10174	0.601235
10	A10	27	67.1712	6.00034	0.59308
10	A10	28	67.4398	5.98791	0.584759
10	A10	29	67.7084	5.89338	0.578441
10	A10	30	67.9771	5.84864	0.575539
10	A10	31	68.2457	5.82898	0.576259
10	A10	32	68.5143	5.72258	0.579777
10	A10	33	68.7829	5.67699	0.584874
10	A10	34	69.0515	5.59877	0.590489
10	A10	35	69.3202	5.55676	0.595799
10	A10	36	69.5888	5.49031	0.599998
10	A10	37	69.8574	5.44442	0.602221
10	A10	38	70.126	5.33488	0.601872
10	A10	39	70.3946	5.29417	0.599115
10	A10	40	70.6633	5.21833	0.595065
10	A10	41	70.9319	5.1831	0.591414
10	A10	42	71.2005	5.1071	0.58981
10	A10	43	71.4691	5.0495	0.591291
10	A10	44	71.7377	4.98223	0.596063
10	A10	45	72.0063	4.92886	0.60346
10	A10	46	72.275	4.87973	0.612086
10	A10	47	72.5436	4.7972	0.62007
10	A10	48	72.8122	4.72598	0.625576
10	A10	49	73.0808	4.67038	0.627381
10	A10	50	73.3494	4.59375	0.625332
10	A10	51	73.6181	4.51686	0.62037
10	A10	52	73.8867	4.46321	0.614092
10	A10	53	74.1553	4.3975	0.607994
10	A10	54	74.4239	4.3619	0.602853
10	A10	55	74.6925	4.25873	0.598578
10	A10	56	74.9612	4.21583	0.594605
10	A10	57	75.2298	4.15879	0.590581
10	A10	58	75.4984	4.07147	0.586839
10	A10	59	75.767	4.02375	0.58442
10	A10	60	76.0356	3.97018	0.584606
10	A10	61	76.3043	3.91826	0.588418
10	A10	62	76.5729	3.85528	0.596565
10	A10	63	76.8415	3.78568	0.610133
10	A10	64	77.1101	3.72767	0.631752
10	A10	65	77.3787	3.64691	0.666755
10	A10	66	77.6474	3.60203	0.72374
10	A10	67	77.916	3.54408	0.814247
10	A10	68	78.1846	3.45176	0.951336
10	A10	69	78.4532	3.38968	1.14689
10	A10	70	78.7218	3.2834	1.40739
10	A10	71	78.9904	3.17848	1.72856
10	A10	72	79.2591	2.98329	2.09034
10	A10	73	79.5277	2.77916	2.45474
10	A10	74	79.7963	2.45647	2.76942
10	A10	75	80.0649	2.03069	2.97795
10	A10	76	80.3335	1.5185	3.03472
10	A10	77	80.6022	1.07151	2.91917
10	A10	78	80.8708	0.678517	2.64348
10	A10	79	81.1394	0.407011	2.24988
10	A10	80	81.408	0.263919	1.79863
10	A10	81	81.6766	0.205785	1.35132
10	A10	82	81.9453	0.164951	0.956294
10	A10	83	82.2139	0.15877	0.640702
10	A10	84	82.4825	0.147883	0.410528
10	A10	85	82.7511	0.133398	0.256352
10	A10	86	83.0197	0.13764	0.161133
10	A10	87	83.2884	0.128955	0.106811
10	A10	88	83.557	0.121523	0.0782283
10	A10	89	83.8256	0.116365	0.0644295
10	A10	90	84.0942	0.114404	0.0582906
10	A10	91	84.3628	0.107186	0.0555037
10	A10	92	84.6315	0.100095	0.0536182
10	A10	93	84.9001	0.0951782	0.0513986
10	A10	94	85.1687	0.0793954	0.0484458
10	A10	95	85.4373	0.0861146	0.0449148
10	A10	96	85.7059	0.0807639	0.0412343
10	A10	97	85.9745	0.0758761	0.0378495
10	A10	98	86.2432	0.0699221	0.0350516
10	A10	99	86.5118	0.0664031	0.0329125
10	A10	100	86.7804	0.069446	0.0312988
10	A10	101	87.049	0.0571349	0.0299404
10	A10	102	87.3176	0.0582878	0.0285428
10	A10	103	87.5863	0.0534552	0.0269125
10	A10	104	87.8549	0.0538329	0.0250345
10	A10	105	88.1235	0.0487776	0.0230612
10	A10	106	88.3921	0.0501252	0.0212221
10	A10	107	88.6607	0.0439942	0.0197095
10	A10	108	88.9294	0.0459478	0.0185908
10	A10	109	89.198	0.0465784	0.0177809
10	A10	110	89.4666	0.0389287	0.0170971
10	A10	111	89.7352	0.0378482	0.016376
10	A10	112	90.0038	0.0368098	0.0155834
10	A10	113	90.2725	0.0372465	0.0148316
10	A10	114	90.5411	0.03695	0.0142796
10	A10	115	90.8097	0.0345399	0.0139958
10	A10	116	91.0783	0.0314939	0.0138951
10	A10	117	91.3469	0.03151	0.0137959
10	A10	118	91.6156	0.0287757	0.0135377
10	A10	119	91.8842	0.0255961	0.0130609
10	A10	120	92.1528	0.029483	0.0123999
10	A10	121	92.4214	0.0266116	0.0116228
10	A10	122	92.69	0.0210031	0.0107867
10	A10	123	92.9586	0.0245813	0.00993706
10	A10	124	93.2273	0.0203909	0.00912056
10	A10	125	93.4959	0.0262814	0.00837223
10	A10	126	93.7645	0.0177812	0.00767765
10	A10	127	94.0331	0.0200356	0.00695611
10	A10	128	94.3018	0.0231316	0.00609872
10	A10	129	94.5704	0.0135489	0.0050439
10	A10	130	94.839	0.0199443	0.00383425
11	A11	1	60.1871	7.98828	0.603513
11	A11	2	60.4557	7.92902	0.60415
11	A11	3	60.7243	7.93122	0.60778
11	A11	4	60.993	7.84266	0.614067
11	A11	5	61.2616	7.77382	0.621689
11	A11	6	61.5302	7.74939	0.628871
11	A11	7	61.7988	7.65478	0.634197
11	A11	8	62.0674	7.54551	0.637195
11	A11	9	62.3361	7.56447	0.638182
11	A11	10	62.6047	7.41442	0.637578
11	A11	11	62.8733	7.4456	0.635347
11	A11	12	63.1419	7.31468	0.631172
11	A11	13	63.4105	7.26987	0.625298
11	A11	14	63.6791	7.15429	0.619181
11	A11	15	63.9478	7.15323	0.615201
11	A11	16	64.2164	7.10521	0.615388
11	A11	17	64.485	6.98668	0.620068
11	A11	18	64.7536	6.98925	0.627461
11	A11	19	65.0222	6.92756	0.6346
11	A11	20	65.2909	6.79189	0.638954
11	A11	21	65.5595	6.74112	0.639669
11	A11	22	65.8281	6.70635	0.637614
11	A11	23	66.0967	6.62511	0.634427
11	A11	24	66.3653	6.59072	0.631416
11	A11	25	66.634	6.47696	0.629079
11	A11	26	66.9026	6.44791	0.627352
11	A11	27	67.1712	6.37002	0.626164
11	A11	28	67.4398	6.32541	0.625774
11	A11	29	67.7084	6.23016	0.626739
11	A11	30	67.9771	6.19983	0.629624
11	A11	31	68.2457	6.11926	0.634625
11	A11	32	68.5143	6.07774	0.641247
11	A11	33	68.7829	5.97992	0.648255
11	A11	34	69.0515	5.94427	0.653857
11	A11	35	69.3202	5.86192	0.656273
11	A11	36	69.5888	5.79794	0.654454
11	A11	37	69.8574	5.69815	0.648632
11	A11	38	70.126	5.66021	0.640326
11	A11	39	70.3946	5.58393	0.631689
11	A11	40	70.6633	5.54618	0.624622
11	A11	41	70.9319	5.46948	0.620177
11	A11	42	71.2005	5.41752	0.618586
11	A11	43	71.4691	5.32303	0.61969
11	A11	44	71.7377	5.29588	0.623289
11	A11	45	72.0063	5.22422	0.629159
11	A11	46	72.275	5.16092	0.636922
11	A11	47	72.5436	5.10561	0.646032
11	A11	48	72.8122	5.02344	0.655934
11	A11	49	73.0808	4.94868	0.666143
11	A11	50	73.3494	4.90385	0.675978
11	A11	51	73.6181	4.82627	0.68417
11	A11	52	73.8867	4.76249	0.688875
11	A11	53	74.1553	4.68705	0.688327
11	A11	54	74.4239	4.58768	0.68191
11	A11	55	74.6925	4.50889	0.670791
11	A11	56	74.9612	4.47836	0.657651
11	A11	57	75.2298	4.41505	0.64559
11	A11	58	75.4984	4.32249	0.63696
11	A11	59	75.767	4.2731	0.632723
11	A11	60	76.0356	4.24712	0.632638
11	A11	61	76.3043	4.13648	0.636003
11	A11	62	76.5729	4.08636	0.642581
11	A11	63	76.8415	4.02134	0.653455
11	A11	64	77.1101	3.97743	0.671708
11	A11	65	77.3787	3.88136	0.703046
11	A11	66	77.6474	3.83972	0.756273
11	A11	67	77.916	3.74448	0.843275
11	A11	68	78.1846	3.7033	0.977915
11	A11	69	78.4532	3.61623	1.1733
11	A11	70	78.7218	3.51814	1.43734
11	A11	71	78.9904	3.42014	1.76719
11	A11	72	79.2591	3.22479	2.14407
11	A11	73	79.5277	3.00864	2.53082
11	A11	74	79.7963	2.71269	2.87479
11	A11	75	80.0649	2.29784	3.11724
11	A11	76	80.3335	1.78869	3.20796
11	A11	77	80.6022	1.30673	3.12032
11	A11	78	80.8708	0.898538	2.86066
11	A11	79	81.1394	0.606001	2.46779
11	A11	80	81.408	0.426177	2.00217
11	A11	81	81.6766	0.339621	1.52922
11	A11	82	81.9453	0.30772	1.10332
11	A11	83	82.2139	0.295928	0.75778
11	A11	84	82.4825	0.276615	0.503081
11	A11	85	82.7511	0.268184	0.331774
11	A11	86	83.0197	0.259128	0.226498
11	A11	87	83.2884	0.245498	0.167513
11	A11	88	83.557	0.230728	0.137628
11	A11	89	83.8256	0.230432	0.124202
11	A11	90	84.0942	0.209924	0.11905
11	A11	91	84.3628	0.198272	0.117381
11	A11	92	84.6315	0.187814	0.116597
11	A11	93	84.9001	0.17388	0.115341
11	A11	94	85.1687	0.163221	0.112897
11	A11	95	85.4373	0.155129	0.10892
11	A11	96	85.7059	0.135025	0.103409
11	A11	97	85.9745	0.127443	0.0967474
11	A11	98	86.2432	0.114906	0.089628
11	A11	99	86.5118	0.114283	0.082781
11	A11	100	86.7804	0.105135	0.076625
11	A11	101	87.049	0.0934149	0.0710926
11	A11	102	87.3176	0.0830198	0.0657716
11	A11	103	87.5863	0.0819621	0.0602624
11	A11	104	87.8549	0.0755836	0.0544855
11	A11	105	88.1235	0.0716016	0.0487337
11	A11	106	88.3921	0.0679375	0.0434823
11	A11	107	88.6607	0.0682803	0.0391394
11	A11	108	88.9294	0.0615589	0.035906
11	A11	109	89.198	0.0578853	0.0337788
11	A11	110	89.4666	0.0570095	0.0326108
11	A11	111	89.7352	0.0545198	0.0321392
11	A11	112	90.0038	0.0515852	0.0319875
11	A11	113	90.2725	0.0457775	0.0317149
11	A11	114	90.5411	0.0438535	0.0309498
11	A11	115	90.8097	0.0346493	0.0295394
11	A11	116	91.0783	0.0370811	0.0275864
11	A11	117	91.3469	0.0386431	0.0253242
11	A11	118	91.6156	0.033034	0.0229334
11	A11	119	91.8842	0.0298762	0.0204725
11	A11	120	92.1528	0.0256988	0.0179845
11	A11	121	92.4214	0.0260337	0.0156579
11	A11	122	92.69	0.0271476	0.0138488
11	A11	123	92.9586	0.0292639	0.0128985
11	A11	124	93.2273	0.0271303	0.0128776
11	A11	125	93.4959	0.0217595	0.0134646
11	A11	126	93.7645	0.0205019	0.0140519
11	A11	127	94.0331	0.0207796	0.0140067
11	A11	128	94.3018	0.0188482	0.0129319
11	A11	129	94.5704	0.0121761	0.0108085
11	A11	130	94.839	0.0139047	0.00798292
12	A12	1	60.1871	7.73088	0.618525
12	A12	2	60.4557	7.72235	0.621974
12	A12	3	60.7243	7.65049	0.626625
12	A12	4	60.993	7.57957	0.631424
12	A12	5	61.2616	7.53641	0.634946
12	A12	6	61.5302	7.44608	0.63566
12	A12	7	61.7988	7.45555	0.632614
12	A12	8	62.0674	7.30266	0.626348
12	A12	9	62.3361	7.23108	0.619279
12	A12	10	62.6047	7.21556	0.614954
12	A12	11	62.8733	7.18957	0.616312
12	A12	12	63.1419	7.07671	0.623949
12	A12	13	63.4105	7.07184	0.635586
12	A12	14	63.6791	6.95799	0.647025
12	A12	15	63.9478	6.90674	0.654083
12	A12	16	64.2164	6.8429	0.654467
12	A12	17	64.485	6.77348	0.648746
12	A12	18	64.7536	6.66028	0.639924
12	A12	19	65.0222	6.63121	0.631849
12	A12	20	65.2909	6.61994	0.627344
12	A12	21	65.5595	6.54766	0.627143
12	A12	22	65.8281	6.43336	0.630146
12	A12	23	66.0967	6.39198	0.634497
12	A12	24	66.3653	6.34362	0.638556
12	A12	25	66.634	6.26646	0.641249
12	A12	26	66.9026	6.2356	0.642094
12	A12	27	67.1712	6.10747	0.641286
12	A12	28	67.4398	6.08168	0.63978
12	A12	29	67.7084	6.00583	0.638941
12	A12	30	67.9771	5.96025	0.639679
12	A12	31	68.2457	5.89769	0.641636
12	A12	32	68.5143	5.84457	0.643167
12	A12	33	68.7829	5.75117	0.642364
12	A12	34	69.0515	5.69937	0.638503
12	A12	35	69.3202	5.61258	0.632832
12	A12	36	69.5888	5.55616	0.62809
12	A12	37	69.8574	5.51633	0.626949
12	A12	38	70.126	5.47161	0.630468
12	A12	39	70.3946	5.40537	0.63752
12	A12	40	70.6633	5.30462	0.645517
12	A12	41	70.9319	5.26744	0.651825
12	A12	42	71.2005	5.2037	0.654874
12	A12	43	71.4691	5.09253	0.654399
12	A12	44	71.7377	5.07553	0.650928
12	A12	45	72.0063	4.99917	0.645111
12	A12	46	72.275	4.92989	0.637516
12	A12	47	72.5436	4.88206	0.629016
12	A12	48	72.8122	4.78108	0.621281
12	A12	49	73.0808	4.73901	0.616679
12	A12	50	73.3494	4.69254	0.617354
12	A12	51	73.6181	4.64708	0.623965
12	A12	52	73.8867	4.58219	0.635058
12	A12	53	74.1553	4.51868	0.647532
12	A12	54	74.4239	4.41035	0.657925
12	A12	55	74.6925	4.37417	0.663653
12	A12	56	74.9612	4.30513	0.663638
12	A12	57	75.2298	4.24066	0.658368
12	A12	58	75.4984	4.14398	0.649695
12	A12	59	75.767	4.09314	0.640455
12	A12	60	76.0356	4.04109	0.633855
12	A12	61	76.3043	3.99344	0.632672
12	A12	62	76.5729	3.92819	0.638715
12	A12	63	76.8415	3.85978	0.653098
12	A12	64	77.1101	3.81518	0.677465
12	A12	65	77.3787	3.72552	0.715763
12	A12	66	77.6474	3.65649	0.775693
12	A12	67	77.916	3.60774	0.869038
12	A12	68	78.1846	3.52403	1.0102
12	A12	69	78.4532	3.44351	1.21267
12	A12	70	78.7218	3.36442	1.48363
12	A12	71	78.9904	3.24039	1.81758
12	A12	72	79.2591	3.0698	2.19125
12	A12	73	79.5277	2.83945	2.56231
12	A12	74	79.7963	2.50993	2.87457
12	A12	75	80.0649	2.0977	3.06999
12	A12	76	80.3335	1.58936	3.10451
12	A12	77	80.6022	1.15361	2.96198
12	A12	78	80.8708	0.805527	2.66042
12	A12	79	81.1394	0.555376	2.24738
12	A12	80	81.408	0.426359	1.78626
12	A12	81	81.6766	0.375394	1.33902
12	A12	82	81.9453	0.348634	0.952026
12	A12	83	82.2139	0.328798	0.649175
12	A12	84	82.4825	0.317787	0.433181
12	A12	85	82.7511	0.303975	0.292174
12	A12	86	83.0197	0.292658	0.207808
12	A12	87	83.2884	0.28261	0.161719
12	A12	88	83.557	0.266361	0.139031
12	A12	89	83.8256	0.266025	0.129232
12	A12	90	84.0942	0.24219	0.125574
12	A12	91	84.3628	0.238246	0.124048
12	A12	92	84.6315	0.214944	0.122507
12	A12	93	84.9001	0.204319	0.12003
12	A12	94	85.1687	0.195282	0.116398
12	A12	95	85.4373	0.187294	0.111656
12	A12	96	85.7059	0.174461	0.105851
12	A12	97	85.9745	0.161432	0.0990198
12	A12	98	86.2432	0.148271	0.0913459
12	A12	99	86.5118	0.141551	0.0832556
12	A12	100	86.7804	0.135613	0.0753161
12	A12	101	87.049	0.1315	0.0679941
12	A12	102	87.3176	0.117545	0.061475
12	A12	103	87.5863	0.118653	0.0556785
12	A12	104	87.8549	0.11217	0.0504181
12	A12	105	88.1235	0.109083	0.0455483
12	A12	106	88.3921	0.10418	0.0410124
12	A12	107	88.6607	0.104218	0.0368312
12	A12	108	88.9294	0.0964292	0.0331122
12	A12	109	89.198	0.0958829	0.0300776
12	A12	110	89.4666	0.0927723	0.0280303
12	A12	111	89.7352	0.0940409	0.0272056
12	A12	112	90.0038	0.0956377	0.0275794
12	A12	113	90.2725	0.0852974	0.0287819
12	A12	114	90.5411	0.081629	0.0302038
12	A12	115	90.8097	0.0796451	0.0312326
12	A12	116	91.0783	0.0785074	0.0314622
12	A12	117	91.3469	0.0711714	0.0307757
12	A12	118	91.6156	0.0700196	0.0293112
12	A12	119	91.8842	0.0675149	0.027381
12	A12	120	92.1528	0.0636876	0.0253748
12	A12	121	92.4214	0.0624243	0.0236399
12	A12	122	92.69	0.0665593	0.0223557
12	A12	123	92.9586	0.0599244	0.0214723
12	A12	124	93.2273	0.0537055	0.0207617
12	A12	125	93.4959	0.0518661	0.0199394
12	A12	126	93.7645	0.0589582	0.0187555
12	A12	127	94.0331	0.051289	0.0170137
12	A12	128	94.3018	0.0499013	0.0145837
12	A12	129	94.5704	0.0428382	0.0114797
12	A12	130	94.839	0.0457945	0.00795904
13	A13	1	60.1871	7.52099	0.532116
13	A13	2	60.4557	7.48953	0.531858
13	A13	3	60.7243	7.45138	0.531847
13	A13	4	60.993	7.39492	0.531939
13	A13	5	61.2616	7.35606	0.532283
13	A13	6	61.5302	7.27562	0.533423
13	A13	7	61.7988	7.21971	0.536009
13	A13	8	62.0674	7.18851	0.540234
13	A13	9	62.3361	7.17766	0.545473
13	A13	10	62.6047	7.05402	0.55037
13	A13	11	62.8733	6.98376	0.553478
13	A13	12	63.1419	6.98879	0.554024
13	A13	13	63.4105	6.92843	0.552496
13	A13	14	63.6791	6.80828	0.550763
13	A13	15	63.9478	6.79269	0.551487
13	A13	16	64.2164	6.71726	0.556866
13	A13	17	64.485	6.73668	0.567274
13	A13	18	64.7536	6.65614	0.580793
13	A13	19	65.0222	6.5588	0.59411
13	A13	20	65.2909	6.49946	0.604209
13	A13	21	65.5595	6.44895	0.609672
13	A13	22	65.8281	6.37643	0.610848
13	A13	23	66.0967	6.33209	0.609224
13	A13	24	66.3653	6.26299	0.606771
13	A13	25	66.634	6.20263	0.605578
13	A13	26	66.9026	6.11278	0.607488
13	A13	27	67.1712	6.07874	0.613319
13	A13	28	67.4398	6.05991	0.622026
13	A13	29	67.7084	5.98418	0.630572
13	A13	30	67.9771	5.85211	0.635098
13	A13	31	68.2457	5.85195	0.63282
13	A13	32	68.5143	5.74546	0.623565
13	A13	33	68.7829	5.6689	0.609906
13	A13	34	69.0515	5.64844	0.59582
13	A13	35	69.3202	5.57028	0.584768
13	A13	36	69.5888	5.54101	0.578335
13	A13	37	69.8574	5.47354	0.576171
13	A13	38	70.126	5.42812	0.577048
13	A13	39	70.3946	5.3089	0.580048
13	A13	40	70.6633	5.29969	0.584954
13	A13	41	70.9319	5.25994	0.591699
13	A13	42	71.2005	5.18261	0.599588
13	A13	43	71.4691	5.11702	0.607136
13	A13	44	71.7377	5.04995	0.612758
13	A13	45	72.0063	4.98057	0.615729
13	A13	46	72.275	4.94015	0.616608
13	A13	47	72.5436	4.85197	0.616827
13	A13	48	72.8122	4.79249	0.617785
13	A13	49	73.0808	4.78761	0.620074
13	A13	50	73.3494	4.66364	0.623329
13	A13	51	73.6181	4.61905	0.626624
13	A13	52	73.8867	4.53713	0.629033
13	A13	53	74.1553	4.52429	0.629929
13	A13	54	74.4239	4.41173	0.628989
13	A13	55	74.6925	4.35285	0.626113
13	A13	56	74.9612	4.30971	0.621382
13	A13	57	75.2298	4.23212	0.615076
13	A13	58	75.4984	4.16339	0.607639
13	A13	59	75.767	4.11413	0.599608
13	A13	60	76.0356	4.06618	0.59172
13	A13	61	76.3043	3.9904	0.585253
13	A13	62	76.5729	3.93027	0.58254
13	A13	63	76.8415	3.88106	0.587303
13	A13	64	77.1101	3.82963	0.60459
13	A13	65	77.3787	3.77893	0.64045
13	A13	66	77.6474	3.73236	0.701721
13	A13	67	77.916	3.66311	0.796224
13	A13	68	78.1846	3.58939	0.933
13	A13	69	78.4532	3.50292	1.12156
13	A13	70	78.7218	3.39884	1.36896
13	A13	71	78.9904	3.30454	1.67452
13	A13	72	79.2591	3.1531	2.02365
13	A13	73	79.5277	2.94204	2.3838
13	A13	74	79.7963	2.674	2.7062
13	A13	75	80.0649	2.26484	2.93481
13	A13	76	80.3335	1.80531	3.02096
13	A13	77	80.6022	1.36079	2.93847
13	A13	78	80.8708	0.961532	2.69313
13	A13	79	81.1394	0.688557	2.32207
13	A13	80	81.408	0.531132	1.88307
13	A13	81	81.6766	0.46255	1.4382
13	A13	82	81.9453	0.427135	1.03833
13	A13	83	82.2139	0.406478	0.713905
13	A13	84	82.4825	0.393932	0.47384
13	A13	85	82.7511	0.370553	0.310734
13	A13	86	83.0197	0.376663	0.208581
13	A13	87	83.2884	0.364999	0.149573
13	A13	88	83.557	0.353885	0.118275
13	A13	89	83.8256	0.344243	0.103187
13	A13	90	84.0942	0.337941	0.0966104
13	A13	91	84.3628	0.328357	0.09382
13	A13	92	84.6315	0.317444	0.0921632
13	A13	93	84.9001	0.304653	0.0903489
13	A13	94	85.1687	0.293084	0.0879101
13	A13	95	85.4373	0.294845	0.0847871
13	A13	96	85.7059	0.28163	0.0810327
13	A13	97	85.9745	0.271293	0.0766862
13	A13	98	86.2432	0.265163	0.0718126
13	A13	99	86.5118	0.256532	0.066595
13	A13	100	86.7804	0.247699	0.0613443
13	A13	101	87.049	0.246992	0.0563847
13	A13	102	87.3176	0.239891	0.0519095
13	A13	103	87.5863	0.235071	0.0479313
13	A13	104	87.8549	0.229032	0.0443629
13	A13	105	88.1235	0.22597	0.0411384
13	A13	106	88.3921	0.227903	0.0382666
13	A13	107	88.6607	0.218214	0.0357901
13	A13	108	88.9294	0.216936	0.0337181
13	A13	109	89.198	0.216986	0.0320033
13	A13	110	89.4666	0.206974	0.0305805
13	A13	111	89.7352	0.211346	0.0294274
13	A13	112	90.0038	0.206141	0.0285983
13	A13	113	90.2725	0.201207	0.0282019
13	A13	114	90.5411	0.201479	0.0283266
13	A13	115	90.8097	0.200978	0.0289444
13	A13	116	91.0783	0.19458	0.029855
13	A13	117	91.3469	0.191185	0.030722
13	A13	118	91.6156	0.18793	0.0312054
13	A13	119	91.8842	0.183445	0.0311203
13	A13	120	92.1528	0.181204	0.0305223
13	A13	121	92.4214	0.177577	0.0296573
13	A13	122	92.69	0.176955	0.0287968
13	A13	123	92.9586	0.17559	0.0280561
13	A13	124	93.2273	0.1699	0.0272999
13	A13	125	93.4959	0.165841	0.0261864
13	A13	126	93.7645	0.164759	0.0243237
13	A13	127	94.0331	0.164311	0.021461
13	A13	128	94.3018	0.157025	0.0176349
13	A13	129	94.5704	0.155678	0.0132082
13	A13	130	94.839	0.161405	0.00877385
14	A14	1	60.1871	8.14471	0.645811
14	A14	2	60.4557	8.06678	0.643585
14	A14	3	60.7243	8.05691	0.637275
14	A14	4	60.993	7.9851	0.627212
14	A14	5	61.2616	7.87315	0.615346
14	A14	6	61.5302	7.82918	0.604552
14	A14	7	61.7988	7.85174	0.59744
14	A14	8	62.0674	7.74046	0.595443
14	A14	9	62.3361	7.67619	0.598826
14	A14	10	62.6047	7.6148	0.60736
14	A14	11	62.8733	7.61147	0.620873
14	A14	12	63.1419	7.48931	0.638955
14	A14	13	63.4105	7.43031	0.660053
14	A14	14	63.6791	7.43513	0.680785
14	A14	15	63.9478	7.34176	0.69644
14	A14	16	64.2164	7.2314	0.70281
14	A14	17	64.485	7.11734	0.698432
14	A14	18	64.7536	7.13299	0.68573
14	A14	19	65.0222	7.01095	0.670243
14	A14	20	65.2909	6.93109	0.658177
14	A14	21	65.5595	6.94996	0.653678
14	A14	22	65.8281	6.86561	0.657318
14	A14	23	66.0967	6.80086	0.666512
14	A14	24	66.3653	6.71547	0.677467
14	A14	25	66.634	6.64973	0.687163
14	A14	26	66.9026	6.56819	0.694197
14	A14	27	67.1712	6.52819	0.698218
14	A14	28	67.4398	6.44665	0.698965
14	A14	29	67.7084	6.41112	0.696013
14	A14	30	67.9771	6.29476	0.689501
14	A14	31	68.2457	6.19165	0.680926
14	A14	32	68.5143	6.18471	0.672929
14	A14	33	68.7829	6.14198	0.667979
14	A14	34	69.0515	6.04113	0.666981
14	A14	35	69.3202	6.0029	0.668935
14	A14	36	69.5888	5.9165	0.671863
14	A14	37	69.8574	5.84813	0.674142
14	A14	38	70.126	5.7704	0.675248
14	A14	39	70.3946	5.73418	0.675652
14	A14	40	70.6633	5.67638	0.67625
14	A14	41	70.9319	5.56269	0.677962
14	A14	42	71.2005	5.53652	0.681548
14	A14	43	71.4691	5.44787	0.687381
14	A14	44	71.7377	5.40424	0.695062
14	A14	45	72.0063	5.33161	0.70322
14	A14	46	72.275	5.26955	0.709885
14	A14	47	72.5436	5.17945	0.713475
14	A14	48	72.8122	5.09141	0.713765
14	A14	49	73.0808	5.04207	0.71213
14	A14	50	73.3494	4.9813	0.710839
14	A14	51	73.6181	4.903	0.711866
14	A14	52	73.8867	4.84388	0.715936
14	A14	53	74.1553	4.776	0.722251
14	A14	54	74.4239	4.69336	0.728868
14	A14	55	74.6925	4.62319	0.733367
14	A14	56	74.9612	4.55905	0.733609
14	A14	57	75.2298	4.46781	0.728383
14	A14	58	75.4984	4.39906	0.717875
14	A14	59	75.767	4.31028	0.703741
14	A14	60	76.0356	4.27706	0.688749
14	A14	61	76.3043	4.19507	0.676146
14	A14	62	76.5729	4.13235	0.669199
14	A14	63	76.8415	4.09302	0.671289
14	A14	64	77.1101	4.01362	0.686673
14	A14	65	77.3787	3.95284	0.721545
14	A14	66	77.6474	3.88792	0.784778
14	A14	67	77.916	3.81949	0.88777
14	A14	68	78.1846	3.78065	1.04305
14	A14	69	78.4532	3.67785	1.26152
14	A14	70	78.7218	3.56593	1.54828
14	A14	71	78.9904	3.44293	1.89729
14	A14	72	79.2591	3.26624	2.28622
14	A14	73	79.5277	3.05174	2.67402
14	A14	74	79.7963	2.71975	3.00459
14	A14	75	80.0649	2.28846	3.21786
14	A14	76	80.3335	1.78209	3.26614
14	A14	77	80.6022	1.31109	3.12962
14	A14	78	80.8708	0.940773	2.82432
14	A14	79	81.1394	0.681515	2.39833
14	A14	80	81.408	0.552488	1.91779
14	A14	81	81.6766	0.485074	1.4486
14	A14	82	81.9453	0.446846	1.04087
14	A14	83	82.2139	0.433736	0.721216
14	A14	84	82.4825	0.422779	0.493517
14	A14	85	82.7511	0.402399	0.345679
14	A14	86	83.0197	0.385765	0.258188
14	A14	87	83.2884	0.367548	0.211214
14	A14	88	83.557	0.353243	0.188672
14	A14	89	83.8256	0.337955	0.179413
14	A14	90	84.0942	0.323535	0.17658
14	A14	91	84.3628	0.297001	0.176295
14	A14	92	84.6315	0.284486	0.176394
14	A14	93	84.9001	0.270356	0.175537
14	A14	94	85.1687	0.249493	0.172732
14	A14	95	85.4373	0.229699	0.167251
14	A14	96	85.7059	0.214727	0.158786
14	A14	97	85.9745	0.190495	0.147675
14	A14	98	86.2432	0.18187	0.13492
14	A14	99	86.5118	0.174082	0.121933
14	A14	100	86.7804	0.156933	0.110059
14	A14	101	87.049	0.151632	0.100145
14	A14	102	87.3176	0.145134	0.0923583
14	A14	103	87.5863	0.131539	0.0863101
14	A14	104	87.8549	0.127179	0.0813605
14	A14	105	88.1235	0.12028	0.0769215
14	A14	106	88.3921	0.111356	0.0726329
14	A14	107	88.6607	0.104964	0.0683955
14	A14	108	88.9294	0.101374	0.0643063
14	A14	109	89.198	0.0941268	0.0605379
14	A14	110	89.4666	0.0911242	0.0571974
14	A14	111	89.7352	0.0830441	0.0542248
14	A14	112	90.0038	0.0845676	0.0513975
14	A14	113	90.2725	0.069856	0.0484562
14	A14	114	90.5411	0.0710631	0.0452759
14	A14	115	90.8097	0.0654816	0.0419613
14	A14	116	91.0783	0.0655622	0.0388025
14	A14	117	91.3469	0.0602988	0.036134
14	A14	118	91.6156	0.0567138	0.0341946
14	A14	119	91.8842	0.0525162	0.0330457
14	A14	120	92.1528	0.0564264	0.0325478
14	A14	121	92.4214	0.048002	0.0323775
14	A14	122	92.69	0.0444709	0.0320946
14	A14	123	92.9586	0.0384168	0.0312596
14	A14	124	93.2273	0.0393145	0.0295628
14	A14	125	93.4959	0.0372046	0.026905
14	A14	126	93.7645	0.0311352	0.0234025
14	A14	127	94.0331	0.0271954	0.0193386
14	A14	128	94.3018	0.0355317	0.0150901
14	A14	129	94.5704	0.0274886	0.0110448
14	A14	130	94.839	0.0295296	0.00752184
15	A15	1	60.1871	8.022	0.616569
15	A15	2	60.4557	7.97973	0.622543
15	A15	3	60.7243	7.89539	0.629824
15	A15	4	60.993	7.8772	0.636686
15	A15	5	61.2616	7.79882	0.641083
15	A15	6	61.5302	7.73886	0.641377
15	A15	7	61.7988	7.65881	0.637183
15	A15	8	62.0674	7.56377	0.629744
15	A15	9	62.3361	7.55328	0.621373
15	A15	10	62.6047	7.46225	0.614354
15	A15	11	62.8733	7.43548	0.610034
15	A15	12	63.1419	7.3974	0.608847
15	A15	13	63.4105	7.2432	0.610963
15	A15	14	63.6791	7.23522	0.616701
15	A15	15	63.9478	7.19277	0.626173
15	A15	16	64.2164	7.16509	0.638507
15	A15	17	64.485	7.02912	0.651582
15	A15	18	64.7536	6.9892	0.66264
15	A15	19	65.0222	6.93967	0.669452
15	A15	20	65.2909	6.82512	0.671313
15	A15	21	65.5595	6.82688	0.669385
15	A15	22	65.8281	6.66278	0.666178
15	A15	23	66.0967	6.66537	0.664312
15	A15	24	66.3653	6.58019	0.665048
15	A15	25	66.634	6.56868	0.667506
15	A15	26	66.9026	6.45877	0.669238
15	A15	27	67.1712	6.39357	0.66801
15	A15	28	67.4398	6.26566	0.663508
15	A15	29	67.7084	6.27461	0.657704
15	A15	30	67.9771	6.1966	0.653621
15	A15	31	68.2457	6.12671	0.65341
15	A15	32	68.5143	6.08277	0.657114
15	A15	33	68.7829	6.01256	0.662802
15	A15	34	69.0515	5.93717	0.667746
15	A15	35	69.3202	5.86094	0.669788
15	A15	36	69.5888	5.78932	0.668154
15	A15	37	69.8574	5.74356	0.663525
15	A15	38	70.126	5.66272	0.657635
15	A15	39	70.3946	5.59873	0.652712
15	A15	40	70.6633	5.53793	0.650958
15	A15	41	70.9319	5.47657	0.653962
15	A15	42	71.2005	5.42496	0.66212
15	A15	43	71.4691	5.34326	0.674257
15	A15	44	71.7377	5.3213	0.687811
15	A15	45	72.0063	5.18835	0.699639
15	A15	46	72.275	5.14828	0.707141
15	A15	47	72.5436	5.06366	0.709143
15	A15	48	72.8122	5.00383	0.706178
15	A15	49	73.0808	4.90959	0.70007
15	A15	50	73.3494	4.8452	0.693048
15	A15	51	73.6181	4.81842	0.686888
15	A15	52	73.8867	4.71156	0.682438
15	A15	53	74.1553	4.65613	0.679729
15	A15	54	74.4239	4.60231	0.678512
15	A15	55	74.6925	4.50006	0.678769
15	A15	56	74.9612	4.45975	0.680795
15	A15	57	75.2298	4.39617	0.684841
15	A15	58	75.4984	4.31556	0.690547
15	A15	59	75.767	4.25289	0.696668
15	A15	60	76.0356	4.19512	0.7014
15	A15	61	76.3043	4.10167	0.703362
15	A15	62	76.5729	4.04756	0.702959
15	A15	63	76.8415	3.95195	0.703519
15	A15	64	77.1101	3.88578	0.71173
15	A15	65	77.3787	3.84723	0.737196
15	A15	66	77.6474	3.77989	0.791449
15	A15	67	77.916	3.72403	0.886935
15	A15	68	78.1846	3.64724	1.036
15	A15	69	78.4532	3.5489	1.24914
15	A15	70	78.7218	3.45591	1.53143
15	A15	71	78.9904	3.32232	1.87693
15	A15	72	79.2591	3.16699	2.26282
15	A15	73	79.5277	2.94149	2.64676
15	A15	74	79.7963	2.59777	2.97115
15	A15	75	80.0649	2.14557	3.17531
15	A15	76	80.3335	1.64608	3.21255
15	A15	77	80.6022	1.18721	3.06545
15	A15	78	80.8708	0.811813	2.75275
15	A15	79	81.1394	0.570548	2.32437
15	A15	80	81.408	0.43977	1.84675
15	A15	81	81.6766	0.386614	1.38458
15	A15	82	81.9453	0.351149	0.985865
15	A15	83	82.2139	0.336821	0.675034
15	A15	84	82.4825	0.326776	0.454369
15	A15	85	82.7511	0.304691	0.311024
15	A15	86	83.0197	0.300109	0.225493
15	A15	87	83.2884	0.278854	0.178383
15	A15	88	83.557	0.267882	0.154176
15	A15	89	83.8256	0.255494	0.142277
15	A15	90	84.0942	0.24149	0.136391
15	A15	91	84.3628	0.225107	0.133252
15	A15	92	84.6315	0.215634	0.131357
15	A15	93	84.9001	0.201402	0.129966
15	A15	94	85.1687	0.193861	0.128481
15	A15	95	85.4373	0.176877	0.126195
15	A15	96	85.7059	0.16384	0.12239
15	A15	97	85.9745	0.146916	0.116608
15	A15	98	86.2432	0.136911	0.108875
15	A15	99	86.5118	0.126175	0.0997003
15	A15	100	86.7804	0.114084	0.0898492
15	A15	101	87.049	0.111631	0.0800469
15	A15	102	87.3176	0.0999591	0.0708115
15	A15	103	87.5863	0.091907	0.0624729
15	A15	104	87.8549	0.0942259	0.0552651
15	A15	105	88.1235	0.0897798	0.0493421
15	A15	106	88.3921	0.0839703	0.0446909
15	A15	107	88.6607	0.0831047	0.0410629
15	A15	108	88.9294	0.0763254	0.0380474
15	A15	109	89.198	0.0726635	0.0352777
15	A15	110	89.4666	0.0681456	0.0326261
15	A15	111	89.7352	0.0690317	0.0302388
15	A15	112	90.0038	0.0674755	0.0283893
15	A15	113	90.2725	0.0630434	0.0272585
15	A15	114	90.5411	0.0625542	0.026788
15	A15	115	90.8097	0.0573807	0.0266848
15	A15	116	91.0783	0.0560227	0.0265564
15	A15	117	91.3469	0.0532573	0.0260923
15	A15	118	91.6156	0.0459585	0.0251973
15	A15	119	91.8842	0.0483097	0.0240108
15	A15	120	92.1528	0.045395	0.0228008
15	A15	121	92.4214	0.0465104	0.021792
15	A15	122	92.69	0.0417869	0.0210337
15	A15	123	92.9586	0.0385334	0.0203829
15	A15	124	93.2273	0.0350273	0.0195908
15	A15	125	93.4959	0.038797	0.0184147
15	A15	126	93.7645	0.0337977	0.016692
15	A15	127	94.0331	0.031007	0.0143811
15	A15	128	94.3018	0.0283517	0.0115921
15	A15	129	94.5704	0.0315602	0.0085914
15	A15	130	94.839	0.0310649	0.00574233
16	A16	1	60.1871	8.42686	0.618576
16	A16	2	60.4557	8.43019	0.621858
16	A16	3	60.7243	8.35503	0.622489
16	A16	4	60.993	8.2789	0.618954
16	A16	5	61.2616	8.16317	0.61145
16	A16	6	61.5302	8.19133	0.60211
16	A16	7	61.7988	8.05582	0.594196
16	A16	8	62.0674	8.05472	0.590676
16	A16	9	62.3361	7.93415	0.593035
16	A16	10	62.6047	7.9607	0.600804
16	A16	11	62.8733	7.85866	0.612042
16	A16	12	63.1419	7.76807	0.624366
16	A16	13	63.4105	7.72583	0.635854
16	A16	14	63.6791	7.63186	0.645348
[truncated: 26,506 more rows]
